# Supplementary material for: Transitioning the Molecular Tumor Board from Proof of Concept to Clinical Routine: A German Single-Center Analysis
Source: Cancers (Basel). 2021 Mar 8;13(5):1151. doi: 10.3390/cancers13051151 (PMC7962829; doi:10.3390/cancers13051151)
Supplement: Supplementary file 1 [file cancers-13-01151-s001.zip › Supplementary_Data_1.xlsx]

## Sheet: S_Data_1
Chr	Start	End	Ref	Alt	Type	Symbol	Exonic Function	AAChange	CChange	snp150	TSG	OG	HS	Condel	Cosmic84	OncoKB
chr1	115256529	115256529	T	A	exonic	NRAS	nonsynonymous SNV	p.Q61L	c.182A>T	rs11554290	0	1	Q61L	D	ID=COSM583;OCCURENCE=1(salivary_gland),19(NS),52(haematopoietic_and_lymphoid_tissue),1(soft_tissue),8(urinary_tract),1(pancreas),6(liver),1(autonomic_ganglia),142(skin),1(prostate),26(lung),1(meninges),11(thyroid),4(upper_aerodigestive_tract),25(large_intestine),3(eye),2(central_nervous_system),2(endometrium)	Melanoma,EL:3A:Binimetinib, Binimetinib + Ribociclib(16273091, 28284557, 22983396) ; Thyroid Cancer,EL:3A:Selumetinib + Radioiodine Uptake Therapy(22105174, 23406027) ; Colorectal Cancer,EL:R1:Panitumumab, Cetuximab(20619739, 24024844, 25110411, 24024839)
chr1	115256529	115256529	T	C	exonic	NRAS	nonsynonymous SNV	p.Q61R	c.182A>G	rs11554290	0	1	Q61R	D	ID=COSM584;OCCURENCE=5(ovary),1(bone),7(breast),110(NS),1(stomach),177(haematopoietic_and_lymphoid_tissue),1(kidney),5(soft_tissue),9(urinary_tract),3(pancreas),3(liver),1(genital_tract),7(adrenal_gland),578(skin),13(lung),1(cervix),11(meninges),449(thyroid),5(upper_aerodigestive_tract),3(testis),1(thymus),10(eye),61(large_intestine),6(central_nervous_system),1(small_intestine),7(biliary_tract),4…	Melanoma,EL:3A:Binimetinib, Binimetinib + Ribociclib(16273091, 28284557, 22983396) ; Thyroid Cancer,EL:3A:Selumetinib + Radioiodine Uptake Therapy(22105174, 23406027) ; Colorectal Cancer,EL:R1:Panitumumab, Cetuximab(20619739, 24024844, 25110411, 24024839)
chr1	115256530	115256530	G	T	exonic	NRAS	nonsynonymous SNV	p.Q61K	c.181C>A	rs121913254	0	1	Q61K	D	ID=COSM580;OCCURENCE=2(pleura),2(ovary),3(breast),4(bone),74(NS),2(stomach),180(haematopoietic_and_lymphoid_tissue),1(kidney),2(urinary_tract),33(soft_tissue),2(pancreas),1(peritoneum),4(liver),5(autonomic_ganglia),595(skin),1(prostate),21(lung),2(cervix),3(meninges),87(thyroid),1(thymus),6(eye),105(large_intestine),7(central_nervous_system),5(biliary_tract),2(endometrium)	Melanoma,EL:3A:Binimetinib, Binimetinib + Ribociclib(16273091, 28284557, 22983396) ; Thyroid Cancer,EL:3A:Selumetinib + Radioiodine Uptake Therapy(22105174, 23406027) ; Colorectal Cancer,EL:R1:Panitumumab, Cetuximab(20619739, 24024844, 25110411, 24024839)
chr1	115256533	115256533	C	T	exonic	NRAS	nonsynonymous SNV	p.G60R	c.178G>A		0	1	0	D		Melanoma,EL:3A:Binimetinib, Binimetinib + Ribociclib(16273091, 28284557, 22983396) ; Thyroid Cancer,EL:3A:Selumetinib + Radioiodine Uptake Therapy(22105174, 23406027) ; Colorectal Cancer,EL:R1:Panitumumab, Cetuximab(20619739, 24024844, 25110411, 24024839)
chr1	115256538	115256538	G	T	exonic	NRAS	nonsynonymous SNV	p.T58K	c.173C>A		0	1	0	D		Melanoma,EL:3A:Binimetinib, Binimetinib + Ribociclib(16273091, 28284557, 22983396) ; Thyroid Cancer,EL:3A:Selumetinib + Radioiodine Uptake Therapy(22105174, 23406027) ; Colorectal Cancer,EL:R1:Panitumumab, Cetuximab(20619739, 24024844, 25110411, 24024839)
chr1	115256542	115256542	C	T	exonic	NRAS	nonsynonymous SNV	p.D57N	c.169G>A		0	1	0	D	ID=COSM6438073;OCCURENCE=1(large_intestine)	Melanoma,EL:3A:Binimetinib, Binimetinib + Ribociclib(16273091, 28284557, 22983396) ; Thyroid Cancer,EL:3A:Selumetinib + Radioiodine Uptake Therapy(22105174, 23406027) ; Colorectal Cancer,EL:R1:Panitumumab, Cetuximab(20619739, 24024844, 25110411, 24024839)
chr1	115256559	115256559	C	T	exonic	NRAS	nonsynonymous SNV	p.C51Y	c.152G>A		0	1	0	N
chr1	115256570	115256570	A	C	exonic	NRAS	nonsynonymous SNV	p.D47E	c.141T>G		0	1	0	D		Melanoma,EL:3A:Binimetinib, Binimetinib + Ribociclib(16273091, 28284557, 22983396) ; Thyroid Cancer,EL:3A:Selumetinib + Radioiodine Uptake Therapy(22105174, 23406027) ; Colorectal Cancer,EL:R1:Panitumumab, Cetuximab(20619739, 24024844, 25110411, 24024839)
chr1	115256572	115256572	C	T	exonic	NRAS	nonsynonymous SNV	p.D47N	c.139G>A		0	1	0	D		Melanoma,EL:3A:Binimetinib, Binimetinib + Ribociclib(16273091, 28284557, 22983396) ; Thyroid Cancer,EL:3A:Selumetinib + Radioiodine Uptake Therapy(22105174, 23406027) ; Colorectal Cancer,EL:R1:Panitumumab, Cetuximab(20619739, 24024844, 25110411, 24024839)
chr1	115256574	115256574	A	T	exonic	NRAS	nonsynonymous SNV	p.I46K	c.137T>A		0	1	0	D		Melanoma,EL:3A:Binimetinib, Binimetinib + Ribociclib(16273091, 28284557, 22983396) ; Thyroid Cancer,EL:3A:Selumetinib + Radioiodine Uptake Therapy(22105174, 23406027) ; Colorectal Cancer,EL:R1:Panitumumab, Cetuximab(20619739, 24024844, 25110411, 24024839)
chr1	115256583	115256583	T	A	exonic	NRAS	nonsynonymous SNV	p.Q43L	c.128A>T		0	1	0	D		Melanoma,EL:3A:Binimetinib, Binimetinib + Ribociclib(16273091, 28284557, 22983396) ; Thyroid Cancer,EL:3A:Selumetinib + Radioiodine Uptake Therapy(22105174, 23406027) ; Colorectal Cancer,EL:R1:Panitumumab, Cetuximab(20619739, 24024844, 25110411, 24024839)
chr1	115256589	115256589	C	T	exonic	NRAS	nonsynonymous SNV	p.R41K	c.122G>A		0	1	0	N
chr1	115256590	115256590	T	C	exonic	NRAS	nonsynonymous SNV	p.R41G	c.121A>G		0	1	0	D		Melanoma,EL:3A:Binimetinib, Binimetinib + Ribociclib(16273091, 28284557, 22983396) ; Thyroid Cancer,EL:3A:Selumetinib + Radioiodine Uptake Therapy(22105174, 23406027) ; Colorectal Cancer,EL:R1:Panitumumab, Cetuximab(20619739, 24024844, 25110411, 24024839)
chr1	115258730	115258730	C	T	exonic	NRAS	nonsynonymous SNV	p.A18T	c.52G>A	rs121913248	0	1	0	D	ID=COSM577;OCCURENCE=1(penis),13(skin)	Melanoma,EL:3A:Binimetinib, Binimetinib + Ribociclib(16273091, 28284557, 22983396) ; Thyroid Cancer,EL:3A:Selumetinib + Radioiodine Uptake Therapy(22105174, 23406027) ; Colorectal Cancer,EL:R1:Panitumumab, Cetuximab(20619739, 24024844, 25110411, 24024839)
chr1	115258739	115258739	C	T	exonic	NRAS	nonsynonymous SNV	p.G15R	c.43G>A		0	1	0	D		Melanoma,EL:3A:Binimetinib, Binimetinib + Ribociclib(16273091, 28284557, 22983396) ; Thyroid Cancer,EL:3A:Selumetinib + Radioiodine Uptake Therapy(22105174, 23406027) ; Colorectal Cancer,EL:R1:Panitumumab, Cetuximab(20619739, 24024844, 25110411, 24024839)
chr1	115258742	115258742	C	T	exonic	NRAS	nonsynonymous SNV	p.V14I	c.40G>A		0	1	0	D		Melanoma,EL:3A:Binimetinib, Binimetinib + Ribociclib(16273091, 28284557, 22983396) ; Thyroid Cancer,EL:3A:Selumetinib + Radioiodine Uptake Therapy(22105174, 23406027) ; Colorectal Cancer,EL:R1:Panitumumab, Cetuximab(20619739, 24024844, 25110411, 24024839)
chr1	115258745	115258745	C	G	exonic	NRAS	nonsynonymous SNV	p.G13R	c.37G>C	rs121434595	0	1	G13R	D	ID=COSM569;OCCURENCE=1(salivary_gland),1(pleura),1(breast),9(NS),4(stomach),77(haematopoietic_and_lymphoid_tissue),1(urinary_tract),3(soft_tissue),1(genital_tract),3(autonomic_ganglia),38(skin),1(thyroid),1(eye),15(large_intestine),5(biliary_tract),1(endometrium)	Melanoma,EL:3A:Binimetinib, Binimetinib + Ribociclib(16273091, 28284557, 22983396) ; Thyroid Cancer,EL:3A:Selumetinib + Radioiodine Uptake Therapy(22105174, 23406027) ; Colorectal Cancer,EL:R1:Panitumumab, Cetuximab(20619739, 24024844, 25110411, 24024839)
chr1	115258750	115258750	C	-	exonic	NRAS	frameshift deletion	p.A11Efs*9	c.32delC		0	1	0
chr1	115258751	115258751	C	T	exonic	NRAS	nonsynonymous SNV	p.A11T	c.31G>A		0	1	0	D	ID=COSM558;OCCURENCE=2(haematopoietic_and_lymphoid_tissue),1(skin)	Melanoma,EL:3A:Binimetinib, Binimetinib + Ribociclib(16273091, 28284557, 22983396) ; Thyroid Cancer,EL:3A:Selumetinib + Radioiodine Uptake Therapy(22105174, 23406027) ; Colorectal Cancer,EL:R1:Panitumumab, Cetuximab(20619739, 24024844, 25110411, 24024839)
chr10	43609082	43609082	C	T	exonic	RET	nonsynonymous SNV	p.P613L	c.1838C>T	rs761596036	0	1	0	D	ID=COSM4014166,COSM4014167;OCCURENCE=1(stomach)
chr10	43609106	43609106	A	T	exonic	RET	nonsynonymous SNV	p.E621V	c.1862A>T		0	1	0	D
chr10	43609109	43609109	C	T	exonic	RET	nonsynonymous SNV	p.P622L	c.1865C>T		0	1	0	D
chr10	43609120	43609120	C	T	exonic	RET	stopgain	p.Q626	c.1876_1878		0	1	0
chr10	43609941	43609941	C	G	exonic	RET	nonsynonymous SNV	p.D631E	c.1893C>G		0	1	0	D
chr10	43609957	43609957	G	A	exonic	RET	nonsynonymous SNV	p.V637M	c.1909G>A		0	1	0	D	ID=COSM1957214;OCCURENCE=1(NS)
chr10	43609969	43609969	G	A	exonic	RET	nonsynonymous SNV	p.A641T	c.1921G>A	rs377767411	0	1	0	D
chr10	43609990	43609990	G	A	exonic	RET	nonsynonymous SNV	p.V648I	c.1942G>A	rs77711105	0	1	0	D	ID=COSM1223553;OCCURENCE=1(NS),1(thyroid),1(large_intestine)
chr10	43610000	43610000	T	A	exonic	RET	nonsynonymous SNV	p.L651Q	c.1952T>A		0	1	0	D
chr10	43610008	43610008	G	A	exonic	RET	nonsynonymous SNV	p.A654T	c.1960G>A		0	1	0	N
chr10	43610024	43610024	G	A	exonic	RET	nonsynonymous SNV	p.C659Y	c.1976G>A		0	1	0	N
chr10	43613839	43613839	A	T	exonic	RET	nonsynonymous SNV	p.E768V	c.2303A>T		0	1	0	D
chr10	43613844	43613844	C	T	exonic	RET	stopgain	p.R770	c.2308_2310	rs775711017	0	1	0		ID=COSM3437788,COSM272178;OCCURENCE=1(skin),1(lung),1(large_intestine)
chr10	43613848	43613848	A	G	exonic	RET	nonsynonymous SNV	p.D771G	c.2312A>G		0	1	0	D
chr10	43613868	43613868	G	A	exonic	RET	nonsynonymous SNV	p.V778I	c.2332G>A	rs75686697	0	1	0	N	ID=COSM3807174,COSM3807173;OCCURENCE=1(breast)
chr10	43613893	43613893	A	G	exonic	RET	nonsynonymous SNV	p.H786R	c.2357A>G		0	1	0	N
chr10	43613898	43613898	A	T	exonic	RET	nonsynonymous SNV	p.I788F	c.2362A>T		0	1	0	D
chr10	43613919	43613919	A	T	exonic	RET	nonsynonymous SNV	p.S795C	c.2383A>T		0	1	0	D
chr10	43613925	43613925	G	T	exonic	RET	nonsynonymous SNV	p.D797Y	c.2389G>T		0	1	0	D
chr10	43615571	43615571	G	T	exonic	RET	stopgain	p.E884	c.2650_2652		0	1	0
chr10	43615593	43615593	C	T	exonic	RET	nonsynonymous SNV	p.S891L	c.2672C>T		0	1	0	D	ID=COSM1584950,COSM918124;OCCURENCE=4(skin),1(endometrium)
chr10	43615595	43615595	G	C	exonic	RET	nonsynonymous SNV	p.D892H	c.2674G>C		0	1	0	D
chr10	43615599	43615599	T	C	exonic	RET	nonsynonymous SNV	p.F893S	c.2678T>C		0	1	0	D
chr10	43615608	43615608	C	T	exonic	RET	nonsynonymous SNV	p.S896F	c.2687C>T		0	1	0	D
chr10	43615622	43615622	G	T	exonic	RET	stopgain	p.E901	c.2701_2703		0	1	0
chr10	43615626	43615626	A	G	exonic	RET	nonsynonymous SNV	p.E902G	c.2705A>G		0	1	0	N
chr10	43615650	43615650	A	T	exonic	RET	nonsynonymous SNV	p.Q910L	c.2729A>T		0	1	0	N
chr10	43617416	43617416	T	C	exonic	RET	nonsynonymous SNV	p.M918T	c.2753T>C	rs74799832	0	1	M918T	D	ID=COSM4770356,COSM965;OCCURENCE=1(breast),30(adrenal_gland),325(thyroid)
chr10	43617424	43617424	G	T	exonic	RET	stopgain	p.E921	c.2761_2763		0	1	0
chr10	43617430	43617430	C	T	exonic	RET	nonsynonymous SNV	p.L923F	c.2767C>T		0	1	0	D
chr10	43617435	43617435	T	-	exonic	RET	frameshift deletion	p.F924Lfs*22	c.2772delT		0	1	0
chr10	43617449	43617449	C	T	exonic	RET	nonsynonymous SNV	p.T929I	c.2786C>T		0	1	0	D
chr10	43617455	43617455	A	T	exonic	RET	nonsynonymous SNV	p.Q931L	c.2792A>T		0	1	0	N
chr10	89624259	89624259	A	C	exonic	PTEN	nonsynonymous SNV	p.R11S	c.33A>C		1	0	0	N
chr10	89624270	89624270	G	T	exonic	PTEN	nonsynonymous SNV	p.R15I	c.44G>T	rs398123324	1	0	0	D	ID=COSM5232;OCCURENCE=2(liver),1(central_nervous_system),3(endometrium)	Breast Cancer,EL:4:AZD6482 + Alpelisib(25409150) ; All Tumors,EL:4:GSK2636771, AZD8186(18594509, 22588880, 25398829, 16647110, 25544636)
chr10	89685305	89685305	T	C	exonic	PTEN	nonsynonymous SNV	p.I67T	c.200T>C		1	0	I67T	D	ID=COSM921071;OCCURENCE=1(endometrium)	Breast Cancer,EL:4:AZD6482 + Alpelisib(25409150) ; All Tumors,EL:4:GSK2636771, AZD8186(18594509, 22588880, 25398829, 16647110, 25544636)
chr10	89685307	89685307	T	A	exonic	PTEN	nonsynonymous SNV	p.Y68N	c.202T>A	rs398123317	1	0	Y68N	D	ID=COSM249839;OCCURENCE=1(breast),1(large_intestine),1(endometrium)	Breast Cancer,EL:4:AZD6482 + Alpelisib(25409150) ; All Tumors,EL:4:GSK2636771, AZD8186(18594509, 22588880, 25398829, 16647110, 25544636)
chr10	89711891	89711891	G	T	exonic	PTEN	nonsynonymous SNV	p.S170I	c.509G>T	rs876660507	1	0	S170I	D	ID=COSM5218;OCCURENCE=1(breast),3(central_nervous_system),1(endometrium)	Breast Cancer,EL:4:AZD6482 + Alpelisib(25409150) ; All Tumors,EL:4:GSK2636771, AZD8186(18594509, 22588880, 25398829, 16647110, 25544636)
chr10	89711935	89711935	C	T	exonic	PTEN	nonsynonymous SNV	p.H185Y	c.553C>T		1	0	0	D	ID=COSM6438109;OCCURENCE=2(large_intestine)	Breast Cancer,EL:4:AZD6482 + Alpelisib(25409150) ; All Tumors,EL:4:GSK2636771, AZD8186(18594509, 22588880, 25398829, 16647110, 25544636)
chr10	89711941	89711941	G	T	exonic	PTEN	nonsynonymous SNV	p.D187Y	c.559G>T		1	0	0	D	ID=COSM1577268;OCCURENCE=1(large_intestine)	Breast Cancer,EL:4:AZD6482 + Alpelisib(25409150) ; All Tumors,EL:4:GSK2636771, AZD8186(18594509, 22588880, 25398829, 16647110, 25544636)
chr10	89711957	89711957	C	T	exonic	PTEN	nonsynonymous SNV	p.A192V	c.575C>T		1	0	0	D		Breast Cancer,EL:4:AZD6482 + Alpelisib(25409150) ; All Tumors,EL:4:GSK2636771, AZD8186(18594509, 22588880, 25398829, 16647110, 25544636)
chr10	89711969	89711969	A	G	exonic	PTEN	nonsynonymous SNV	p.H196R	c.587A>G		1	0	0	N
chr10	89711971	89711971	A	T	exonic	PTEN	stopgain	p.K197	c.589_591		1	0	0
chr10	89712007	89712007	G	T	exonic	PTEN	stopgain	p.G209	c.625_627		1	0	0		ID=COSM308351;OCCURENCE=2(haematopoietic_and_lymphoid_tissue),1(central_nervous_system)
chr10	89712008	89712008	G	A	exonic	PTEN	nonsynonymous SNV	p.G209E	c.626G>A		1	0	0	D	ID=COSM5984395;OCCURENCE=1(upper_aerodigestive_tract)	Breast Cancer,EL:4:AZD6482 + Alpelisib(25409150) ; All Tumors,EL:4:GSK2636771, AZD8186(18594509, 22588880, 25398829, 16647110, 25544636)
chr10	89717613	89717613	C	T	exonic	PTEN	nonsynonymous SNV	p.P213L	c.638C>T		1	0	0	D	ID=COSM6438160;OCCURENCE=1(large_intestine)	Breast Cancer,EL:4:AZD6482 + Alpelisib(25409150) ; All Tumors,EL:4:GSK2636771, AZD8186(18594509, 22588880, 25398829, 16647110, 25544636)
chr10	89717624	89717624	G	T	exonic	PTEN	nonsynonymous SNV	p.V217F	c.649G>T		1	0	0	D		Breast Cancer,EL:4:AZD6482 + Alpelisib(25409150) ; All Tumors,EL:4:GSK2636771, AZD8186(18594509, 22588880, 25398829, 16647110, 25544636)
chr10	89717624	89717624	G	C	exonic	PTEN	nonsynonymous SNV	p.V217L	c.649G>C		1	0	0	D		Breast Cancer,EL:4:AZD6482 + Alpelisib(25409150) ; All Tumors,EL:4:GSK2636771, AZD8186(18594509, 22588880, 25398829, 16647110, 25544636)
chr10	89717625	89717625	T	A	exonic	PTEN	nonsynonymous SNV	p.V217D	c.650T>A		1	0	0	D	ID=COSM1159818;OCCURENCE=1(haematopoietic_and_lymphoid_tissue),1(endometrium)	Breast Cancer,EL:4:AZD6482 + Alpelisib(25409150) ; All Tumors,EL:4:GSK2636771, AZD8186(18594509, 22588880, 25398829, 16647110, 25544636)
chr10	89717628	89717628	G	T	exonic	PTEN	nonsynonymous SNV	p.C218F	c.653G>T		1	0	0	N
chr10	89717642	89717642	A	-	exonic	PTEN	frameshift deletion	p.K223	c.667_669		1	0	0		ID=COSM5858;OCCURENCE=1(upper_aerodigestive_tract),1(endometrium)
chr10	89717643	89717643	A	G	exonic	PTEN	nonsynonymous SNV	p.K223R	c.668A>G		1	0	0	D		Breast Cancer,EL:4:AZD6482 + Alpelisib(25409150) ; All Tumors,EL:4:GSK2636771, AZD8186(18594509, 22588880, 25398829, 16647110, 25544636)
chr10	89717699	89717699	G	A	exonic	PTEN	nonsynonymous SNV	p.E242K	c.724G>A		1	0	0	D	ID=COSM5087;OCCURENCE=1(endometrium)	Breast Cancer,EL:4:AZD6482 + Alpelisib(25409150) ; All Tumors,EL:4:GSK2636771, AZD8186(18594509, 22588880, 25398829, 16647110, 25544636)
chr10	89717702	89717702	T	C	exonic	PTEN	nonsynonymous SNV	p.F243L	c.727T>C		1	0	0	N
chr10	89717708	89717708	C	A	exonic	PTEN	nonsynonymous SNV	p.Q245K	c.733C>A		1	0	0	D		Breast Cancer,EL:4:AZD6482 + Alpelisib(25409150) ; All Tumors,EL:4:GSK2636771, AZD8186(18594509, 22588880, 25398829, 16647110, 25544636)
chr10	89717717	89717717	C	G	exonic	PTEN	nonsynonymous SNV	p.P248A	c.742C>G		1	0	0	D		Breast Cancer,EL:4:AZD6482 + Alpelisib(25409150) ; All Tumors,EL:4:GSK2636771, AZD8186(18594509, 22588880, 25398829, 16647110, 25544636)
chr10	89717736	89717736	A	G	exonic	PTEN	nonsynonymous SNV	p.K254R	c.761A>G		1	0	0	D		Breast Cancer,EL:4:AZD6482 + Alpelisib(25409150) ; All Tumors,EL:4:GSK2636771, AZD8186(18594509, 22588880, 25398829, 16647110, 25544636)
chr10	89717742	89717742	A	T	exonic	PTEN	nonsynonymous SNV	p.E256V	c.767A>T		1	0	0	D		Breast Cancer,EL:4:AZD6482 + Alpelisib(25409150) ; All Tumors,EL:4:GSK2636771, AZD8186(18594509, 22588880, 25398829, 16647110, 25544636)
chr10	89717744	89717760	AGAGTTCTTCCACAAAC	-	exonic	PTEN	frameshift deletion	p.F257	c.769_771		1	0	0
chr10	89717745	89717745	T	A	exonic	PTEN	nonsynonymous SNV	p.F257Y	c.770T>A		1	0	0	D		Breast Cancer,EL:4:AZD6482 + Alpelisib(25409150) ; All Tumors,EL:4:GSK2636771, AZD8186(18594509, 22588880, 25398829, 16647110, 25544636)
chr10	89717754	89717754	A	G	exonic	PTEN	nonsynonymous SNV	p.K260R	c.779A>G	rs1060500125	1	0	0	D		Breast Cancer,EL:4:AZD6482 + Alpelisib(25409150) ; All Tumors,EL:4:GSK2636771, AZD8186(18594509, 22588880, 25398829, 16647110, 25544636)
chr10	89717762	89717762	A	G	exonic	PTEN	nonsynonymous SNV	p.K263E	c.787A>G		1	0	0	D		Breast Cancer,EL:4:AZD6482 + Alpelisib(25409150) ; All Tumors,EL:4:GSK2636771, AZD8186(18594509, 22588880, 25398829, 16647110, 25544636)
chr10	89717767	89717767	G	C	exonic	PTEN	nonsynonymous SNV	p.M264I	c.792G>C		1	0	0	D		Breast Cancer,EL:4:AZD6482 + Alpelisib(25409150) ; All Tumors,EL:4:GSK2636771, AZD8186(18594509, 22588880, 25398829, 16647110, 25544636)
chr10	89717768	89717768	C	A	exonic	PTEN	nonsynonymous SNV	p.L265I	c.793C>A		1	0	0	N
chr10	89720735	89720735	T	C	exonic	PTEN	nonsynonymous SNV	p.C296R	c.886T>C	rs786202207	1	0	0	D		Breast Cancer,EL:4:AZD6482 + Alpelisib(25409150) ; All Tumors,EL:4:GSK2636771, AZD8186(18594509, 22588880, 25398829, 16647110, 25544636)
chr10	89720763	89720763	G	T	exonic	PTEN	nonsynonymous SNV	p.S305I	c.914G>T		1	0	0	D		Breast Cancer,EL:4:AZD6482 + Alpelisib(25409150) ; All Tumors,EL:4:GSK2636771, AZD8186(18594509, 22588880, 25398829, 16647110, 25544636)
chr10	89720771	89720771	C	T	exonic	PTEN	nonsynonymous SNV	p.R308C	c.922C>T	rs1064794436	1	0	0	D	ID=COSM6228;OCCURENCE=1(eye),1(central_nervous_system)	Breast Cancer,EL:4:AZD6482 + Alpelisib(25409150) ; All Tumors,EL:4:GSK2636771, AZD8186(18594509, 22588880, 25398829, 16647110, 25544636)
chr10	89720807	89720807	T	-	exonic	PTEN	stopgain	p.L320	c.958_960		1	0	0
chr10	89720814	89720814	A	G	exonic	PTEN	nonsynonymous SNV	p.K322R	c.965A>G		1	0	0	D		Breast Cancer,EL:4:AZD6482 + Alpelisib(25409150) ; All Tumors,EL:4:GSK2636771, AZD8186(18594509, 22588880, 25398829, 16647110, 25544636)
chr10	89720822	89720822	C	T	exonic	PTEN	nonsynonymous SNV	p.L325F	c.973C>T		1	0	0	D	ID=COSM1349616;OCCURENCE=1(lung),1(cervix)	Breast Cancer,EL:4:AZD6482 + Alpelisib(25409150) ; All Tumors,EL:4:GSK2636771, AZD8186(18594509, 22588880, 25398829, 16647110, 25544636)
chr10	89720835	89720835	A	T	exonic	PTEN	nonsynonymous SNV	p.N329I	c.986A>T		1	0	0	D		Breast Cancer,EL:4:AZD6482 + Alpelisib(25409150) ; All Tumors,EL:4:GSK2636771, AZD8186(18594509, 22588880, 25398829, 16647110, 25544636)
chr10	89720853	89720853	G	A	exonic	PTEN	nonsynonymous SNV	p.R335Q	c.1004G>A	rs1085308040	1	0	0	D		Breast Cancer,EL:4:AZD6482 + Alpelisib(25409150) ; All Tumors,EL:4:GSK2636771, AZD8186(18594509, 22588880, 25398829, 16647110, 25544636)
chr10	89720855	89720855	C	G	exonic	PTEN	nonsynonymous SNV	p.Y336	c.1006_1008		1	0	0
chr10	89720873	89720873	A	T	exonic	PTEN	stopgain	p.K342	c.1024_1026		1	0	0
chr10	123243247	123243247	C	T	exonic	FGFR2	nonsynonymous SNV	p.D528N	c.1582G>A		0	1	0	D
chr10	123247506	123247506	T	C	exonic	FGFR2	nonsynonymous SNV	p.N550S	c.1649A>G	rs962103382	0	1	0	N
chr10	123256064	123256064	G	T	exonic	FGFR2	synonymous SNV	p.E526	c.1576_1578	rs763592672	0	1	0
chr10	123258061	123258061	C	G	exonic	FGFR2	nonsynonymous SNV	p.M541I	c.1623G>C		0	1	0	N
chr10	123258113	123258113	G	C	exonic	FGFR2	nonsynonymous SNV	p.A524G	c.1571C>G		0	1	0	D
chr10	123263361	123263361	G	A	exonic	FGFR2	nonsynonymous SNV	p.A372V	c.1115C>T	rs376451171	0	1	0	D
chr10	123274794	123274794	T	C	exonic	FGFR2	nonsynonymous SNV	p.Y376C	c.1127A>G	rs121913478	0	1	Y375C	D	ID=COSM1152151,COSM36904,COSM915498,COSM4851879,COSM915499;OCCURENCE=1(salivary_gland),1(liver),2(skin),1(cervix),4(biliary_tract),6(endometrium)
chr10	123274813	123274813	T	C	exonic	FGFR2	nonsynonymous SNV	p.I370V	c.1108A>G		0	1	0	N
chr10	123274833	123274833	G	C	exonic	FGFR2	nonsynonymous SNV	p.A363G	c.1088C>G		0	1	0	D
chr10	123276854	123276854	C	T	exonic	FGFR2	nonsynonymous SNV	p.A266T	c.796G>A		0	1	0	D
chr10	123279545	123279545	T	C	exonic	FGFR2	nonsynonymous SNV	p.K296R	c.887A>G		0	1	0	N	ID=COSM5427240,COSM5427241,COSM5427238,COSM5427237,COSM5427239;OCCURENCE=1(haematopoietic_and_lymphoid_tissue)
chr10	123279565	123279565	C	T	exonic	FGFR2	synonymous SNV	p.Q289	c.865_867		0	1	0
chr10	123279575	123279575	G	A	exonic	FGFR2	nonsynonymous SNV	p.P286L	c.857C>T		0	1	0	D	ID=COSM5946057;OCCURENCE=1(skin)
chr10	123279581	123279581	G	A	exonic	FGFR2	nonsynonymous SNV	p.A284V	c.851C>T		0	1	0	D
chr10	123279603	123279603	C	A	exonic	FGFR2	nonsynonymous SNV	p.V277F	c.829G>T		0	1	0	D
chr10	123279614	123279614	T	C	exonic	FGFR2	nonsynonymous SNV	p.D273G	c.818A>G		0	1	0	D
chr10	123279626	123279626	A	T	exonic	FGFR2	nonsynonymous SNV	p.V269E	c.806T>A		0	1	0	D
chr11	533878	533878	C	T	exonic	HRAS	nonsynonymous SNV	p.G60S	c.178G>A		0	1	0	D	ID=COSM1354328,COSM1354327;OCCURENCE=1(large_intestine)	Head and Neck Squamous Cell Carcinoma,EL:3A:Tipifarnib(12497061, 24240680)
chr11	533895	533895	T	C	exonic	HRAS	nonsynonymous SNV	p.D54G	c.161A>G		0	1	0	D		Head and Neck Squamous Cell Carcinoma,EL:3A:Tipifarnib(12497061, 24240680)
chr11	533903	533903	C	A	exonic	HRAS	synonymous SNV	p.C51	c.151_153	rs759482455	0	1	0
chr11	533907	533907	G	A	exonic	HRAS	nonsynonymous SNV	p.T50M	c.149C>T		0	1	0	D		Head and Neck Squamous Cell Carcinoma,EL:3A:Tipifarnib(12497061, 24240680)
chr11	533913	533913	C	T	exonic	HRAS	nonsynonymous SNV	p.G48E	c.143G>A		0	1	0	D		Head and Neck Squamous Cell Carcinoma,EL:3A:Tipifarnib(12497061, 24240680)
chr11	533915	533915	A	C	exonic	HRAS	nonsynonymous SNV	p.D47E	c.141T>G		0	1	0	D		Head and Neck Squamous Cell Carcinoma,EL:3A:Tipifarnib(12497061, 24240680)
chr11	533919	533919	A	T	exonic	HRAS	nonsynonymous SNV	p.I46N	c.137T>A		0	1	0	D		Head and Neck Squamous Cell Carcinoma,EL:3A:Tipifarnib(12497061, 24240680)
chr11	533930	533930	A	T	exonic	HRAS	synonymous SNV	p.K42	c.124_126	rs775378080	0	1	0
chr11	533934	533934	C	T	exonic	HRAS	nonsynonymous SNV	p.R41Q	c.122G>A		0	1	0	D	ID=COSM5576070,COSM5576071;OCCURENCE=1(stomach)	Head and Neck Squamous Cell Carcinoma,EL:3A:Tipifarnib(12497061, 24240680)
chr11	534279	534279	C	T	exonic	HRAS	nonsynonymous SNV	p.G15D	c.44G>A		0	1	0	D	ID=COSM6503575;OCCURENCE=1(soft_tissue)	Head and Neck Squamous Cell Carcinoma,EL:3A:Tipifarnib(12497061, 24240680)
chr11	534283	534283	C	T	exonic	HRAS	nonsynonymous SNV	p.V14M	c.40G>A		0	1	0	D		Head and Neck Squamous Cell Carcinoma,EL:3A:Tipifarnib(12497061, 24240680)
chr11	534311	534311	T	A	exonic	HRAS	synonymous SNV	p.Y4	c.10_12		0	1	0
chr11	534316	534316	C	T	exonic	HRAS	nonsynonymous SNV	p.E3K	c.7G>A		0	1	0	N
chr11	108117846	108117846	T	A	exonic	ATM	nonsynonymous SNV	p.C353S	c.1057T>A		1	0	0	D
chr11	108119828	108119828	T	A	exonic	ATM	nonsynonymous SNV	p.W412R	c.1234T>A		1	0	0	N
chr11	108123558	108123558	T	A	exonic	ATM	nonsynonymous SNV	p.L606H	c.1817T>A		1	0	0	D	ID=COSM4664089,COSM4664088;OCCURENCE=2(large_intestine)
chr11	108123564	108123564	T	C	exonic	ATM	nonsynonymous SNV	p.L608P	c.1823T>C		1	0	0	D
chr11	108123566	108123566	G	-	exonic	ATM	frameshift deletion	p.E609Rfs*5	c.1825delG		1	0	0
chr11	108123567	108123567	A	T	exonic	ATM	nonsynonymous SNV	p.E609V	c.1826A>T		1	0	0	D
chr11	108123575	108123575	C	T	exonic	ATM	nonsynonymous SNV	p.L612F	c.1834C>T	rs747242300	1	0	0	D
chr11	108123584	108123584	C	T	exonic	ATM	nonsynonymous SNV	p.L615F	c.1843C>T		1	0	0	D
chr11	108123594	108123594	A	G	exonic	ATM	nonsynonymous SNV	p.K618R	c.1853A>G		1	0	0	D	ID=COSM6196814;OCCURENCE=1(large_intestine)
chr11	108123599	108123599	T	G	exonic	ATM	nonsynonymous SNV	p.C620G	c.1858T>G		1	0	0	D
chr11	108123609	108123609	C	T	exonic	ATM	nonsynonymous SNV	p.A623V	c.1868C>T		1	0	0	D
chr11	108123621	108123621	T	-	exonic	ATM	frameshift deletion	p.Q628Pfs*7	c.1880dupT		1	0	0
chr11	108123623	108123623	C	T	exonic	ATM	stopgain	p.Q628	c.1882_1884		1	0	0		ID=COSM6067448,COSM6067449;OCCURENCE=1(lung)
chr11	108123632	108123632	C	T	exonic	ATM	nonsynonymous SNV	p.P631S	c.1891C>T		1	0	0	N	ID=COSM922712,COSM1585359;OCCURENCE=1(endometrium)
chr11	108138053	108138053	G	C	exonic	ATM	nonsynonymous SNV	p.E874D	c.2622G>C		1	0	0	D
chr11	108138061	108138061	G	C	exonic	ATM	nonsynonymous SNV	p.S877T	c.2630G>C	rs370269552	1	0	0	N
chr11	108155135	108155135	C	T	exonic	ATM	stopgain	p.Q1310	c.3928_3930		1	0	0
chr11	108155139	108155139	A	T	exonic	ATM	nonsynonymous SNV	p.Q1311L	c.3932A>T		1	0	0	N
chr11	108155140	108155141	AG	-	exonic	ATM	frameshift deletion	p.E1313Dfs*7	c.3933_3934delAA		1	0	0
chr11	108155141	108155141	A	T	exonic	ATM	stopgain	p.R1312	c.3934_3936		1	0	0
chr11	108155154	108155154	C	T	exonic	ATM	nonsynonymous SNV	p.T1316I	c.3947C>T		1	0	0	N
chr11	108155154	108155154	C	G	exonic	ATM	nonsynonymous SNV	p.T1316S	c.3947C>G		1	0	0	N
chr11	108155171	108155171	C	T	exonic	ATM	nonsynonymous SNV	p.L1322F	c.3964C>T	rs144535256	1	0	0	N
chr11	108155177	108155177	A	-	exonic	ATM	frameshift deletion	p.S1324	c.3970_3972		1	0	0
chr11	108155200	108155200	G	T	exonic	ATM	nonsynonymous SNV	p.Q1331H	c.3993G>T		1	0	0	D	ID=COSM309331;OCCURENCE=1(lung)
chr11	108170506	108170506	A	T	exonic	ATM	nonsynonymous SNV	p.S1691C	c.5071A>T		1	0	0	N
chr11	108170508	108170508	T	G	exonic	ATM	nonsynonymous SNV	p.S1691R	c.5073T>G		1	0	0	N
chr11	108170525	108170525	C	T	exonic	ATM	nonsynonymous SNV	p.T1697I	c.5090C>T		1	0	0	N
chr11	108170553	108170553	A	C	exonic	ATM	nonsynonymous SNV	p.K1706N	c.5118A>C		1	0	0	N
chr11	108170561	108170561	A	T	exonic	ATM	nonsynonymous SNV	p.Q1709L	c.5126A>T		1	0	0	D
chr11	108170575	108170575	A	G	exonic	ATM	nonsynonymous SNV	p.M1714V	c.5140A>G		1	0	0	N
chr11	108172442	108172443	CT	-	exonic	ATM	frameshift deletion	p.F1749	c.5245_5247		1	0	0
chr11	108172472	108172472	C	A	exonic	ATM	nonsynonymous SNV	p.P1759T	c.5275C>A		1	0	0	D
chr11	108172481	108172481	G	-	exonic	ATM	frameshift deletion	p.A1762	c.5284_5286		1	0	0
chr11	108173650	108173650	C	T	exonic	ATM	nonsynonymous SNV	p.P1797L	c.5390C>T		1	0	0	D
chr11	108173662	108173662	A	G	exonic	ATM	nonsynonymous SNV	p.N1801S	c.5402A>G		1	0	0	N
chr11	108173664	108173664	C	T	exonic	ATM	nonsynonymous SNV	p.H1802Y	c.5404C>T		1	0	0	D
chr11	108173667	108173667	G	T	exonic	ATM	nonsynonymous SNV	p.D1803Y	c.5407G>T		1	0	0	D
chr11	108173675	108173675	G	T	exonic	ATM	nonsynonymous SNV	p.W1805C	c.5415G>T		1	0	0	D
chr11	108173679	108173679	A	G	exonic	ATM	nonsynonymous SNV	p.K1807E	c.5419A>G		1	0	0	D
chr11	108173680	108173680	A	G	exonic	ATM	nonsynonymous SNV	p.K1807R	c.5420A>G		1	0	0	D
chr11	108173701	108173701	T	-	exonic	ATM	frameshift deletion	p.L1814Wfs*14	c.5441delT		1	0	0
chr11	108173719	108173719	A	T	exonic	ATM	nonsynonymous SNV	p.K1820I	c.5459A>T	rs983664978	1	0	0	D
chr11	108173741	108173741	A	T	exonic	ATM	nonsynonymous SNV	p.L1827F	c.5481A>T		1	0	0	D
chr11	108173743	108173743	A	T	exonic	ATM	nonsynonymous SNV	p.K1828M	c.5483A>T		1	0	0	D
chr11	108173745	108173745	C	T	exonic	ATM	nonsynonymous SNV	p.P1829S	c.5485C>T		1	0	0	D	ID=COSM6196823;OCCURENCE=1(large_intestine)
chr11	108173749	108173749	T	A	exonic	ATM	nonsynonymous SNV	p.M1830K	c.5489T>A		1	0	0	N
chr11	108180958	108180958	C	T	exonic	ATM	nonsynonymous SNV	p.A1945V	c.5834C>T		1	0	0	D
chr11	108180961	108180961	A	T	exonic	ATM	nonsynonymous SNV	p.Q1946L	c.5837A>T		1	0	0	D
chr11	108180966	108180966	T	A	exonic	ATM	nonsynonymous SNV	p.C1948	c.5842_5844		1	0	0	D
chr11	108180969	108180969	G	T	exonic	ATM	nonsynonymous SNV	p.A1949S	c.5845G>T		1	0	0	N
chr11	108180996	108180996	G	T	exonic	ATM	nonsynonymous SNV	p.A1958S	c.5872G>T		1	0	0	N
chr11	108180997	108180997	C	T	exonic	ATM	nonsynonymous SNV	p.A1958V	c.5873C>T		1	0	0	N	ID=COSM1350911,COSM1350910;OCCURENCE=1(large_intestine)
chr11	108181024	108181024	T	C	exonic	ATM	nonsynonymous SNV	p.M1967T	c.5900T>C		1	0	0	N
chr11	108181029	108181029	G	T	exonic	ATM	nonsynonymous SNV	p.D1969Y	c.5905G>T		1	0	0	N
chr11	108181032	108181032	C	T	exonic	ATM	stopgain	p.Q1970	c.5908_5910	rs587781722	1	0	0		ID=COSM5563386,COSM5563385;OCCURENCE=1(prostate)
chr11	108181038	108181038	A	T	exonic	ATM	stopgain	p.K1972	c.5914_5916		1	0	0
chr11	108200961	108200961	G	T	exonic	ATM	nonsynonymous SNV	p.R2443L	c.7328G>T		1	0	0	D
chr11	108200963	108200963	G	T	exonic	ATM	stopgain	p.E2444	c.7330_7332		1	0	0
chr11	108200981	108200981	T	-	exonic	ATM	stopgain	p.L2450	c.7348_7350		1	0	0
chr11	108200985	108200985	C	T	exonic	ATM	nonsynonymous SNV	p.A2451V	c.7352C>T		1	0	0	D
chr11	108200990	108200990	C	T	exonic	ATM	nonsynonymous SNV	p.R2453C	c.7357C>T	rs755418571	1	0	0	D
chr11	108201017	108201017	T	C	exonic	ATM	nonsynonymous SNV	p.F2462L	c.7384T>C	rs878853543	1	0	0	D
chr11	108201023	108201023	T	A	exonic	ATM	nonsynonymous SNV	p.C2464	c.7390_7392		1	0	0	D
chr11	108201023	108201023	T	C	exonic	ATM	nonsynonymous SNV	p.C2464R	c.7390T>C	rs55801750	1	0	0	D	ID=COSM758329;OCCURENCE=1(haematopoietic_and_lymphoid_tissue),1(large_intestine)
chr11	108201038	108201038	A	G	exonic	ATM	nonsynonymous SNV	p.N2469D	c.7405A>G		1	0	0	D
chr11	108201059	108201059	A	G	exonic	ATM	nonsynonymous SNV	p.S2476G	c.7426A>G		1	0	0	D
chr11	108205786	108205786	A	-	exonic	ATM	stopgain	p.I2701	c.8101_8103		1	0	0
chr11	108205805	108205805	C	T	exonic	ATM	nonsynonymous SNV	p.S2707F	c.8120C>T		1	0	0	D	ID=COSM5731187,COSM5731188;OCCURENCE=1(small_intestine)
chr11	108205823	108205823	G	T	exonic	ATM	nonsynonymous SNV	p.R2713I	c.8138G>T		1	0	0	D
chr11	108206599	108206599	G	C	exonic	ATM	nonsynonymous SNV	p.V2727L	c.8179G>C		1	0	0	D
chr11	108206610	108206610	G	T	exonic	ATM	nonsynonymous SNV	p.Q2730H	c.8190G>T		1	0	0	D
chr11	108206618	108206618	C	-	exonic	ATM	frameshift deletion	p.Q2733Rfs*18	c.8198delA		1	0	0
chr11	108206627	108206627	A	G	exonic	ATM	nonsynonymous SNV	p.N2736S	c.8207A>G		1	0	0	D
chr11	108206657	108206657	G	T	exonic	ATM	nonsynonymous SNV	p.R2746M	c.8237G>T		1	0	0	D
chr11	108206672	108206672	C	A	exonic	ATM	nonsynonymous SNV	p.T2751N	c.8252C>A		1	0	0	N
chr11	108206688	108206688	G	C	exonic	ATM	nonsynonymous SNV	p.K2756N	c.8268G>C		1	0	0	D
chr11	108236098	108236098	A	T	exonic	ATM	stopgain	p.R3012	c.9034_9036		1	0	0
chr11	108236120	108236120	G	T	exonic	ATM	nonsynonymous SNV	p.G3019V	c.9056G>T	rs191796763	1	0	0	N
chr11	108236135	108236135	C	T	exonic	ATM	nonsynonymous SNV	p.T3024I	c.9071C>T	rs786203183	1	0	0	N
chr11	108236155	108236155	C	T	exonic	ATM	stopgain	p.Q3031	c.9091_9093		1	0	0
chr11	108236176	108236176	C	T	exonic	ATM	stopgain	p.Q3038	c.9112_9114		1	0	0
chr11	108236180	108236180	C	T	exonic	ATM	nonsynonymous SNV	p.A3039V	c.9116C>T		1	0	0	D
chr11	108236203	108236203	C	T	exonic	ATM	stopgain	p.R3047	c.9139_9141	rs121434219	1	0	0		ID=COSM21624,COSM1152251;OCCURENCE=4(haematopoietic_and_lymphoid_tissue),1(prostate),1(endometrium)
chr11	108236213	108236213	C	T	exonic	ATM	nonsynonymous SNV	p.P3050L	c.9149C>T	rs778267979	1	0	0	D	ID=COSM6196825;OCCURENCE=1(large_intestine)
chr11	108236215	108236215	G	A	exonic	ATM	nonsynonymous SNV	p.G3051R	c.9151G>A		1	0	0	D
chr12	25378562	25378562	C	T	exonic	KRAS	nonsynonymous SNV	p.A146T	c.436G>A	rs121913527	0	1	A146T	D	ID=COSM19404,COSM1165198;OCCURENCE=2(stomach),29(haematopoietic_and_lymphoid_tissue),1(urinary_tract),3(pancreas),1(peritoneum),1(genital_tract),1(skin),1(upper_aerodigestive_tract),128(large_intestine),2(small_intestine),3(biliary_tract),2(endometrium)	Colorectal Cancer,EL:R1:Panitumumab, Cetuximab(21228335, 20619739, 18316791, 20921465, 24024839) ; Non-Small Cell Lung Cancer,EL:4:Binimetinib, Trametinib(25801412, 23934108, 22805291, 24746704, 28783719) ; All Tumors,EL:4:LY3214996, KO-947, GDC-0994(22805291, 15483017, 28783719)
chr12	25378567	25378567	G	A	exonic	KRAS	nonsynonymous SNV	p.T144I	c.431C>T		0	1	0	D		Colorectal Cancer,EL:R1:Panitumumab, Cetuximab(21228335, 20619739, 18316791, 20921465, 24024839) ; Non-Small Cell Lung Cancer,EL:4:Binimetinib, Trametinib(25801412, 23934108, 22805291, 24746704, 28783719) ; All Tumors,EL:4:LY3214996, KO-947, GDC-0994(22805291, 15483017, 28783719)
chr12	25378567	25378567	G	T	exonic	KRAS	nonsynonymous SNV	p.T144K	c.431C>A		0	1	0	D		Colorectal Cancer,EL:R1:Panitumumab, Cetuximab(21228335, 20619739, 18316791, 20921465, 24024839) ; Non-Small Cell Lung Cancer,EL:4:Binimetinib, Trametinib(25801412, 23934108, 22805291, 24746704, 28783719) ; All Tumors,EL:4:LY3214996, KO-947, GDC-0994(22805291, 15483017, 28783719)
chr12	25378571	25378571	G	-	exonic	KRAS	frameshift deletion	p.E143Kfs*18	c.426_427insAA		0	1	0
chr12	25378577	25378577	A	G	exonic	KRAS	nonsynonymous SNV	p.F141L	c.421T>C		0	1	0	D		Colorectal Cancer,EL:R1:Panitumumab, Cetuximab(21228335, 20619739, 18316791, 20921465, 24024839) ; Non-Small Cell Lung Cancer,EL:4:Binimetinib, Trametinib(25801412, 23934108, 22805291, 24746704, 28783719) ; All Tumors,EL:4:LY3214996, KO-947, GDC-0994(22805291, 15483017, 28783719)
chr12	25378590	25378590	A	C	exonic	KRAS	nonsynonymous SNV	p.S136R	c.408T>G		0	1	0	N
chr12	25378591	25378591	C	T	exonic	KRAS	nonsynonymous SNV	p.S136N	c.407G>A	rs757816355	0	1	0	D	ID=COSM4169162,COSM4169163;OCCURENCE=1(haematopoietic_and_lymphoid_tissue),1(large_intestine)	Colorectal Cancer,EL:R1:Panitumumab, Cetuximab(21228335, 20619739, 18316791, 20921465, 24024839) ; Non-Small Cell Lung Cancer,EL:4:Binimetinib, Trametinib(25801412, 23934108, 22805291, 24746704, 28783719) ; All Tumors,EL:4:LY3214996, KO-947, GDC-0994(22805291, 15483017, 28783719)
chr12	25378610	25378610	C	T	exonic	KRAS	nonsynonymous SNV	p.A130T	c.388G>A		0	1	0	D		Colorectal Cancer,EL:R1:Panitumumab, Cetuximab(21228335, 20619739, 18316791, 20921465, 24024839) ; Non-Small Cell Lung Cancer,EL:4:Binimetinib, Trametinib(25801412, 23934108, 22805291, 24746704, 28783719) ; All Tumors,EL:4:LY3214996, KO-947, GDC-0994(22805291, 15483017, 28783719)
chr12	25378611	25378611	C	T	exonic	KRAS	synonymous SNV	p.Q129	c.385_387		0	1	0
chr12	25378645	25378645	C	T	exonic	KRAS	nonsynonymous SNV	p.C118Y	c.353G>A		0	1	0	D		Colorectal Cancer,EL:R1:Panitumumab, Cetuximab(21228335, 20619739, 18316791, 20921465, 24024839) ; Non-Small Cell Lung Cancer,EL:4:Binimetinib, Trametinib(25801412, 23934108, 22805291, 24746704, 28783719) ; All Tumors,EL:4:LY3214996, KO-947, GDC-0994(22805291, 15483017, 28783719)
chr12	25378647	25378647	T	G	exonic	KRAS	nonsynonymous SNV	p.K117N	c.351A>C	rs770248150	0	1	K117N	D	ID=COSM19940,COSM1256061;OCCURENCE=6(haematopoietic_and_lymphoid_tissue),1(oesophagus),1(skin),8(large_intestine),1(small_intestine)	Colorectal Cancer,EL:R1:Panitumumab, Cetuximab(21228335, 20619739, 18316791, 20921465, 24024839) ; Non-Small Cell Lung Cancer,EL:4:Binimetinib, Trametinib(25801412, 23934108, 22805291, 24746704, 28783719) ; All Tumors,EL:4:LY3214996, KO-947, GDC-0994(22805291, 15483017, 28783719)
chr12	25378648	25378648	T	C	exonic	KRAS	nonsynonymous SNV	p.K117R	c.350A>G		0	1	K117R	D	ID=COSM4696722,COSM4696721;OCCURENCE=2(large_intestine)	Colorectal Cancer,EL:R1:Panitumumab, Cetuximab(21228335, 20619739, 18316791, 20921465, 24024839) ; Non-Small Cell Lung Cancer,EL:4:Binimetinib, Trametinib(25801412, 23934108, 22805291, 24746704, 28783719) ; All Tumors,EL:4:LY3214996, KO-947, GDC-0994(22805291, 15483017, 28783719)
chr12	25378654	25378654	C	T	exonic	KRAS	nonsynonymous SNV	p.G115E	c.344G>A		0	1	0	D	ID=COSM6438035;OCCURENCE=1(large_intestine)	Colorectal Cancer,EL:R1:Panitumumab, Cetuximab(21228335, 20619739, 18316791, 20921465, 24024839) ; Non-Small Cell Lung Cancer,EL:4:Binimetinib, Trametinib(25801412, 23934108, 22805291, 24746704, 28783719) ; All Tumors,EL:4:LY3214996, KO-947, GDC-0994(22805291, 15483017, 28783719)
chr12	25378679	25378679	C	T	exonic	KRAS	nonsynonymous SNV	p.E107K	c.319G>A		0	1	0	N	ID=COSM6438037;OCCURENCE=1(large_intestine)
chr12	25380274	25380274	C	T	exonic	KRAS	nonsynonymous SNV	p.E62K	c.184G>A		0	1	0	D	ID=COSM3459506,COSM3459505;OCCURENCE=1(skin)	Colorectal Cancer,EL:R1:Panitumumab, Cetuximab(21228335, 20619739, 18316791, 20921465, 24024839) ; Non-Small Cell Lung Cancer,EL:4:Binimetinib, Trametinib(25801412, 23934108, 22805291, 24746704, 28783719) ; All Tumors,EL:4:LY3214996, KO-947, GDC-0994(22805291, 15483017, 28783719)
chr12	25380275	25380275	T	A	exonic	KRAS	nonsynonymous SNV	p.Q61H	c.183A>T	rs17851045	0	1	Q61H	D	ID=COSM555,COSM1146992;OCCURENCE=1(breast),1(stomach),8(haematopoietic_and_lymphoid_tissue),3(soft_tissue),14(pancreas),3(liver),23(lung),2(cervix),38(large_intestine),2(biliary_tract)	Colorectal Cancer,EL:R1:Panitumumab, Cetuximab(21228335, 20619739, 18316791, 20921465, 24024839) ; Non-Small Cell Lung Cancer,EL:4:Binimetinib, Trametinib(25801412, 23934108, 22805291, 24746704, 28783719) ; All Tumors,EL:4:LY3214996, KO-947, GDC-0994(22805291, 15483017, 28783719)
chr12	25380277	25380277	G	T	exonic	KRAS	nonsynonymous SNV	p.Q61K	c.181C>A	rs121913238	0	1	Q61K	D	ID=COSM1159597,COSM549;OCCURENCE=1(breast),1(NS),1(haematopoietic_and_lymphoid_tissue),2(stomach),1(kidney),2(urinary_tract),4(pancreas),1(skin),2(prostate),10(lung),4(thyroid),3(upper_aerodigestive_tract),17(large_intestine)	Colorectal Cancer,EL:R1:Panitumumab, Cetuximab(21228335, 20619739, 18316791, 20921465, 24024839) ; Non-Small Cell Lung Cancer,EL:4:Binimetinib, Trametinib(25801412, 23934108, 22805291, 24746704, 28783719) ; All Tumors,EL:4:LY3214996, KO-947, GDC-0994(22805291, 15483017, 28783719)
chr12	25380292	25380292	G	T	exonic	KRAS	nonsynonymous SNV	p.L56I	c.166C>A		0	1	0	D		Colorectal Cancer,EL:R1:Panitumumab, Cetuximab(21228335, 20619739, 18316791, 20921465, 24024839) ; Non-Small Cell Lung Cancer,EL:4:Binimetinib, Trametinib(25801412, 23934108, 22805291, 24746704, 28783719) ; All Tumors,EL:4:LY3214996, KO-947, GDC-0994(22805291, 15483017, 28783719)
chr12	25380296	25380296	A	C	exonic	KRAS	nonsynonymous SNV	p.D54E	c.162T>G		0	1	0	N
chr12	25380331	25380331	G	T	exonic	KRAS	nonsynonymous SNV	p.Q43K	c.127C>A		0	1	0	D		Colorectal Cancer,EL:R1:Panitumumab, Cetuximab(21228335, 20619739, 18316791, 20921465, 24024839) ; Non-Small Cell Lung Cancer,EL:4:Binimetinib, Trametinib(25801412, 23934108, 22805291, 24746704, 28783719) ; All Tumors,EL:4:LY3214996, KO-947, GDC-0994(22805291, 15483017, 28783719)
chr12	25398257	25398257	A	C	exonic	KRAS	nonsynonymous SNV	p.I21R	c.62T>G		0	1	0	D	ID=COSM4855091,COSM4855090;OCCURENCE=1(cervix)	Colorectal Cancer,EL:R1:Panitumumab, Cetuximab(21228335, 20619739, 18316791, 20921465, 24024839) ; Non-Small Cell Lung Cancer,EL:4:Binimetinib, Trametinib(25801412, 23934108, 22805291, 24746704, 28783719) ; All Tumors,EL:4:LY3214996, KO-947, GDC-0994(22805291, 15483017, 28783719)
chr12	25398275	25398275	C	T	exonic	KRAS	nonsynonymous SNV	p.G15D	c.44G>A		0	1	0	D	ID=COSM539,COSM4169139;OCCURENCE=1(haematopoietic_and_lymphoid_tissue),1(peritoneum)	Colorectal Cancer,EL:R1:Panitumumab, Cetuximab(21228335, 20619739, 18316791, 20921465, 24024839) ; Non-Small Cell Lung Cancer,EL:4:Binimetinib, Trametinib(25801412, 23934108, 22805291, 24746704, 28783719) ; All Tumors,EL:4:LY3214996, KO-947, GDC-0994(22805291, 15483017, 28783719)
chr12	25398279	25398279	C	T	exonic	KRAS	nonsynonymous SNV	p.V14I	c.40G>A	rs104894365	0	1	0	D	ID=COSM12722,COSM1360883;OCCURENCE=1(NS),1(stomach),3(haematopoietic_and_lymphoid_tissue),1(pancreas),1(peritoneum),2(skin),1(lung),13(large_intestine),1(small_intestine),1(endometrium)	Colorectal Cancer,EL:R1:Panitumumab, Cetuximab(21228335, 20619739, 18316791, 20921465, 24024839) ; Non-Small Cell Lung Cancer,EL:4:Binimetinib, Trametinib(25801412, 23934108, 22805291, 24746704, 28783719) ; All Tumors,EL:4:LY3214996, KO-947, GDC-0994(22805291, 15483017, 28783719)
chr12	25398281	25398281	C	T	exonic	KRAS	nonsynonymous SNV	p.G13D	c.38G>A	rs112445441	0	1	G13D	D	ID=COSM532,COSM1140132;OCCURENCE=1(salivary_gland),2(pleura),38(ovary),1(bone),17(breast),4(NS),58(stomach),208(haematopoietic_and_lymphoid_tissue),5(kidney),9(urinary_tract),35(soft_tissue),94(pancreas),5(liver),16(peritoneum),1(genital_tract),4(oesophagus),23(gastrointestinal_tract_(site_indeterminate)),5(skin),23(prostate),185(lung),7(cervix),23(thyroid),7(upper_aerodigestive_tract),2(thymus),…	Colorectal Cancer,EL:R1:Panitumumab, Cetuximab(21228335, 20619739, 18316791, 20921465, 24024839) ; Non-Small Cell Lung Cancer,EL:4:Binimetinib, Trametinib(25801412, 23934108, 22805291, 24746704, 28783719) ; All Tumors,EL:4:LY3214996, KO-947, GDC-0994(22805291, 15483017, 28783719)
chr12	25398283	25398283	G	T	exonic	KRAS	synonymous SNV	p.G12	c.34_36		0	1	0		ID=COSM6697729,COSM524;OCCURENCE=1(pancreas),4(large_intestine)
chr12	25398284	25398284	C	G	exonic	KRAS	nonsynonymous SNV	p.G12A	c.35G>C	rs121913529	0	1	G12A	D	ID=COSM522,COSM1140134;OCCURENCE=45(ovary),2(breast),1(bone),2(NS),53(haematopoietic_and_lymphoid_tissue),27(stomach),5(soft_tissue),7(urinary_tract),83(pancreas),1(peritoneum),1(liver),1(oesophagus),4(gastrointestinal_tract_(site_indeterminate)),2(skin),2(prostate),504(lung),6(thyroid),4(cervix),3(upper_aerodigestive_tract),2(testis),2(thymus),1406(large_intestine),5(central_nervous_system),16(s…	Colorectal Cancer,EL:R1:Panitumumab, Cetuximab(21228335, 20619739, 18316791, 20921465, 24024839) ; Non-Small Cell Lung Cancer,EL:4:Binimetinib, Trametinib(25801412, 23934108, 22805291, 24746704, 28783719) ; All Tumors,EL:4:LY3214996, KO-947, GDC-0994(22805291, 15483017, 28783719)
chr12	25398284	25398284	C	T	exonic	KRAS	nonsynonymous SNV	p.G12D	c.35G>A	rs121913529	0	1	G12D	D	ID=COSM1135366,COSM521;OCCURENCE=1(salivary_gland),321(ovary),23(breast),17(NS),2(penis),218(haematopoietic_and_lymphoid_tissue),106(stomach),7(kidney),23(urinary_tract),28(soft_tissue),2985(pancreas),18(liver),95(peritoneum),1(genital_tract),16(oesophagus),20(gastrointestinal_tract_(site_indeterminate)),39(skin),22(prostate),1273(lung),24(cervix),37(thyroid),33(upper_aerodigestive_tract),2(testi…	Colorectal Cancer,EL:R1:Panitumumab, Cetuximab(21228335, 20619739, 18316791, 20921465, 24024839) ; Non-Small Cell Lung Cancer,EL:4:Binimetinib, Trametinib(25801412, 23934108, 22805291, 24746704, 28783719) ; All Tumors,EL:4:LY3214996, KO-947, GDC-0994(22805291, 15483017, 28783719)
chr12	25398284	25398284	C	A	exonic	KRAS	nonsynonymous SNV	p.G12V	c.35G>T	rs121913529	0	1	G12V	D	ID=COSM1140133,COSM520;OCCURENCE=1(vulva),2(pleura),310(ovary),13(breast),10(NS),38(stomach),74(haematopoietic_and_lymphoid_tissue),6(kidney),6(soft_tissue),21(urinary_tract),1939(pancreas),7(liver),36(peritoneum),4(oesophagus),7(genital_tract),1(autonomic_ganglia),11(gastrointestinal_tract_(site_indeterminate)),29(skin),40(prostate),1476(lung),20(thyroid),12(cervix),4(upper_aerodigestive_tract),…	Colorectal Cancer,EL:R1:Panitumumab, Cetuximab(21228335, 20619739, 18316791, 20921465, 24024839) ; Non-Small Cell Lung Cancer,EL:4:Binimetinib, Trametinib(25801412, 23934108, 22805291, 24746704, 28783719) ; All Tumors,EL:4:LY3214996, KO-947, GDC-0994(22805291, 15483017, 28783719)
chr12	25398285	25398285	C	A	exonic	KRAS	nonsynonymous SNV	p.G12C	c.34G>T	rs121913530	0	1	G12C	D	ID=COSM1140136,COSM516;OCCURENCE=45(ovary),11(breast),2(penis),10(NS),16(stomach),26(haematopoietic_and_lymphoid_tissue),4(kidney),17(soft_tissue),15(urinary_tract),174(pancreas),6(liver),11(peritoneum),2(oesophagus),1(genital_tract),4(gastrointestinal_tract_(site_indeterminate)),1(adrenal_gland),7(skin),10(prostate),2330(lung),3(cervix),18(thyroid),8(upper_aerodigestive_tract),2(testis),1927(lar…	Colorectal Cancer,EL:R1:Panitumumab, Cetuximab(21228335, 20619739, 18316791, 20921465, 24024839) ; Non-Small Cell Lung Cancer,EL:4:Binimetinib, Trametinib(25801412, 23934108, 22805291, 24746704, 28783719) ; All Tumors,EL:4:LY3214996, KO-947, GDC-0994(22805291, 15483017, 28783719)
chr12	25398285	25398285	C	G	exonic	KRAS	nonsynonymous SNV	p.G12R	c.34G>C	rs121913530	0	1	G12R	D	ID=COSM518,COSM1157797;OCCURENCE=30(ovary),8(bone),8(breast),2(NS),1(stomach),22(haematopoietic_and_lymphoid_tissue),7(urinary_tract),796(pancreas),1(peritoneum),1(oesophagus),2(gastrointestinal_tract_(site_indeterminate)),5(skin),1(prostate),101(lung),2(cervix),19(thyroid),2(upper_aerodigestive_tract),4(testis),292(large_intestine),2(central_nervous_system),3(small_intestine),27(biliary_tract),4…	Colorectal Cancer,EL:R1:Panitumumab, Cetuximab(21228335, 20619739, 18316791, 20921465, 24024839) ; Non-Small Cell Lung Cancer,EL:4:Binimetinib, Trametinib(25801412, 23934108, 22805291, 24746704, 28783719) ; All Tumors,EL:4:LY3214996, KO-947, GDC-0994(22805291, 15483017, 28783719)
chr12	25398285	25398285	C	T	exonic	KRAS	nonsynonymous SNV	p.G12S	c.34G>A	rs121913530	0	1	G12S	N	ID=COSM517,COSM1152506;OCCURENCE=9(ovary),2(breast),3(NS),4(penis),12(stomach),42(haematopoietic_and_lymphoid_tissue),1(kidney),7(urinary_tract),1(soft_tissue),110(pancreas),2(liver),2(peritoneum),1(genital_tract),3(oesophagus),6(gastrointestinal_tract_(site_indeterminate)),7(skin),3(prostate),202(lung),20(thyroid),16(cervix),7(upper_aerodigestive_tract),1(testis),1355(large_intestine),1(central_…
chr12	25398291	25398291	C	T	exonic	KRAS	nonsynonymous SNV	p.G10R	c.28G>A		0	1	0	D	ID=COSM1360887,COSM1360888;OCCURENCE=8(liver),1(peritoneum),1(large_intestine)	Colorectal Cancer,EL:R1:Panitumumab, Cetuximab(21228335, 20619739, 18316791, 20921465, 24024839) ; Non-Small Cell Lung Cancer,EL:4:Binimetinib, Trametinib(25801412, 23934108, 22805291, 24746704, 28783719) ; All Tumors,EL:4:LY3214996, KO-947, GDC-0994(22805291, 15483017, 28783719)
chr12	112888175	112888175	A	G	exonic	PTPN11	nonsynonymous SNV	p.D64G	c.191A>G		0	1	0	D
chr12	112888183	112888183	G	T	exonic	PTPN11	stopgain	p.G67	c.199_201		0	1	0
chr12	112888187	112888187	G	T	exonic	PTPN11	nonsynonymous SNV	p.G68V	c.203G>T		0	1	0	D
chr12	112888193	112888193	A	T	exonic	PTPN11	nonsynonymous SNV	p.K70I	c.209A>T		0	1	0	D
chr12	112888202	112888202	C	T	exonic	PTPN11	nonsynonymous SNV	p.T73I	c.218C>T	rs121918462	0	1	0	D	ID=COSM13019;OCCURENCE=19(haematopoietic_and_lymphoid_tissue),1(skin)
chr12	112888208	112888208	C	T	exonic	PTPN11	nonsynonymous SNV	p.A75V	c.224C>T		0	1	0	D
chr12	112888223	112888223	A	T	exonic	PTPN11	nonsynonymous SNV	p.Y80F	c.239A>T		0	1	0	D
chr12	112888246	112888246	T	A	exonic	PTPN11	nonsynonymous SNV	p.L88	c.262_264		0	1	0	D
chr12	112888254	112888254	G	C	exonic	PTPN11	nonsynonymous SNV	p.E90D	c.270G>C		0	1	0	D
chr12	112888286	112888286	C	T	exonic	PTPN11	nonsynonymous SNV	p.P101L	c.302C>T		0	1	0	D
chr12	112926887	112926887	G	T	exonic	PTPN11	nonsynonymous SNV	p.G503W	c.1507G>T		0	1	0	D	ID=COSM5945283;OCCURENCE=1(haematopoietic_and_lymphoid_tissue)
chr12	112926896	112926896	C	T	exonic	PTPN11	stopgain	p.Q506	c.1516_1518	rs387907157	0	1	0
chr12	112926900	112926900	C	T	exonic	PTPN11	nonsynonymous SNV	p.T507I	c.1520C>T		0	1	0	D
chr12	112926939	112926939	A	T	exonic	PTPN11	nonsynonymous SNV	p.H520L	c.1559A>T		0	1	0	D
chr12	112926956	112926956	C	T	exonic	PTPN11	stopgain	p.Q526	c.1576_1578		0	1	0
chr12	112926959	112926959	C	T	exonic	PTPN11	nonsynonymous SNV	p.R527C	c.1579C>T	rs191525506	0	1	0	N	ID=COSM935284;OCCURENCE=1(large_intestine),1(endometrium)
chr12	112926963	112926963	G	T	exonic	PTPN11	nonsynonymous SNV	p.R528M	c.1583G>T		0	1	0	N
chr12	112926963	112926963	G	C	exonic	PTPN11	nonsynonymous SNV	p.R528T	c.1583G>C		0	1	0	N
chr12	121431432	121431432	G	T	exonic	HNF1A	nonsynonymous SNV	p.Q212H	c.636G>T		1	0	0	D
chr12	121431446	121431446	C	T	exonic	HNF1A	nonsynonymous SNV	p.A217V	c.650C>T		1	0	0	D
chr12	121431449	121431449	A	T	exonic	HNF1A	nonsynonymous SNV	p.Y218F	c.653A>T		1	0	0	N
chr12	121431467	121431467	C	T	exonic	HNF1A	nonsynonymous SNV	p.P224L	c.671C>T		1	0	0	D	ID=COSM6342260;OCCURENCE=1(large_intestine)
chr12	121431470	121431470	G	T	exonic	HNF1A	nonsynonymous SNV	p.S225I	c.674G>T		1	0	0	D
chr12	121432074	121432074	A	G	exonic	HNF1A	nonsynonymous SNV	p.E274G	c.821A>G		1	0	0	D
chr12	121432076	121432076	G	T	exonic	HNF1A	stopgain	p.E275	c.823_825		1	0	0
chr12	121432079	121432079	G	T	exonic	HNF1A	nonsynonymous SNV	p.A276S	c.826G>T		1	0	0	D
chr12	121432082	121432082	T	C	exonic	HNF1A	nonsynonymous SNV	p.F277L	c.829T>C		1	0	0	D
chr12	121432085	121432085	C	T	exonic	HNF1A	nonsynonymous SNV	p.R278W	c.832C>T		1	0	0	D	ID=COSM6005771;OCCURENCE=1(NS)
chr12	121432085	121432085	C	-	exonic	HNF1A	frameshift deletion	p.R278Gfs*64	c.832delC		1	0	0
chr12	121432088	121432088	C	T	exonic	HNF1A	nonsynonymous SNV	p.H279Y	c.835C>T	rs768602671	1	0	0	D
chr12	121432092	121432092	A	G	exonic	HNF1A	nonsynonymous SNV	p.K280R	c.839A>G		1	0	0	D
chr12	121432107	121432107	C	T	exonic	HNF1A	nonsynonymous SNV	p.T285M	c.854C>T	rs776327501	1	0	0	D	ID=COSM3384094,COSM3384093;OCCURENCE=1(breast),1(pancreas)
chr12	121432118	121432118	C	T	exonic	HNF1A	nonsynonymous SNV	p.P289S	c.865C>T		1	0	0	D
chr12	121432124	121432124	C	T	exonic	HNF1A	nonsynonymous SNV	p.P291S	c.871C>T	rs151256267	1	0	0	D
chr12	121432124	121432124	C	-	exonic	HNF1A	frameshift deletion	p.P291	c.871_873		1	0	0
chr12	121432125	121432125	G	-	exonic	HNF1A	frameshift deletion	p.P291Qfs*51	c.872delC		1	0	0		ID=COSM21486;OCCURENCE=6(liver),14(large_intestine),1(endometrium)
chr12	121432136	121432136	C	T	exonic	HNF1A	nonsynonymous SNV	p.P295S	c.883C>T		1	0	0	D
chr12	121432167	121432167	C	-	exonic	HNF1A	frameshift deletion	p.P305Lfs*37	c.914delC		1	0	0
chr12	121432182	121432182	C	T	exonic	HNF1A	nonsynonymous SNV	p.P310L	c.929C>T		1	0	0	D
chr12	121432185	121432185	C	T	exonic	HNF1A	nonsynonymous SNV	p.A311V	c.932C>T		1	0	0	D
chr12	121432187	121432187	C	A	exonic	HNF1A	nonsynonymous SNV	p.L312I	c.934C>A		1	0	0	D	ID=COSM5510643,COSM5510642;OCCURENCE=1(biliary_tract)
chr12	121432189	121432189	C	-	exonic	HNF1A	frameshift deletion	p.S313Pfs*29	c.936delC		1	0	0
chr12	121432193	121432194	CC	-	exonic	HNF1A	frameshift deletion	p.P314	c.940_942		1	0	0
chr12	121432194	121432194	C	A	exonic	HNF1A	nonsynonymous SNV	p.P314H	c.941C>A		1	0	0	D
chr13	28592630	28592630	C	T	exonic	FLT3	nonsynonymous SNV	p.D839N	c.2515G>A		0	1	0	N	ID=COSM6005768;OCCURENCE=1(NS),2(large_intestine)
chr13	28592653	28592653	C	T	exonic	FLT3	nonsynonymous SNV	p.G831E	c.2492G>A		0	1	0	D	ID=COSM25248;OCCURENCE=2(haematopoietic_and_lymphoid_tissue)
chr13	28592654	28592654	C	T	exonic	FLT3	nonsynonymous SNV	p.G831R	c.2491G>A		0	1	0	D	ID=COSM6342208;OCCURENCE=2(large_intestine)
chr13	28592686	28592686	G	T	exonic	FLT3	nonsynonymous SNV	p.T820N	c.2459C>A	rs554971395	0	1	0	N	ID=COSM2070126;OCCURENCE=1(genital_tract)
chr13	28592726	28592726	A	T	exonic	FLT3	nonsynonymous SNV	p.C807S	c.2419T>A		0	1	0	D
chr13	28602326	28602326	C	T	exonic	FLT3	nonsynonymous SNV	p.C681Y	c.2042G>A		0	1	0	D
chr13	28602329	28602329	G	T	exonic	FLT3	nonsynonymous SNV	p.A680E	c.2039C>A		0	1	0	D
chr13	28602332	28602332	C	T	exonic	FLT3	nonsynonymous SNV	p.G679E	c.2036G>A		0	1	0	D
chr13	28602333	28602333	C	T	exonic	FLT3	nonsynonymous SNV	p.G679R	c.2035G>A		0	1	0	D
chr13	28602340	28602340	C	-	exonic	FLT3	frameshift deletion	p.L677Cfs*13	c.2029delC		0	1	0
chr13	28602363	28602363	C	T	exonic	FLT3	nonsynonymous SNV	p.G669R	c.2005G>A		0	1	0	D	ID=COSM4533690;OCCURENCE=1(skin)
chr13	28602391	28602391	C	G	exonic	FLT3	nonsynonymous SNV	p.M659I	c.1977G>C		0	1	0	N
chr13	28602420	28602420	C	T	exonic	FLT3	nonsynonymous SNV	p.A650T	c.1948G>A		0	1	0	N	ID=COSM5581103;OCCURENCE=1(skin)
chr13	28608247	28608247	G	A	exonic	FLT3	nonsynonymous SNV	p.W603	c.1807_1809		0	1	0
chr13	28608276	28608276	A	G	exonic	FLT3	nonsynonymous SNV	p.F594L	c.1780T>C	rs1057520021	0	1	0	D	ID=COSM5487444;OCCURENCE=1(haematopoietic_and_lymphoid_tissue)
chr13	28608303	28608303	A	G	exonic	FLT3	nonsynonymous SNV	p.S585P	c.1753T>C		0	1	0	N
chr13	28608315	28608315	C	T	exonic	FLT3	nonsynonymous SNV	p.V581M	c.1741G>A		0	1	0	N
chr13	28610129	28610129	G	A	exonic	FLT3	nonsynonymous SNV	p.S454L	c.1361C>T		0	1	0	N	ID=COSM696841;OCCURENCE=1(lung),1(upper_aerodigestive_tract),1(large_intestine)
chr13	28610140	28610140	G	-	exonic	FLT3	frameshift deletion	p.S451Pfs*51	c.1350delG		0	1	0
chr13	28610162	28610162	G	A	exonic	FLT3	nonsynonymous SNV	p.A443V	c.1328C>T		0	1	0	N
chr13	28610174	28610174	G	A	exonic	FLT3	nonsynonymous SNV	p.P439L	c.1316C>T		0	1	0	N	ID=COSM6342218;OCCURENCE=1(large_intestine)
chr13	28610177	28610177	T	A	exonic	FLT3	nonsynonymous SNV	p.K438I	c.1313A>T		0	1	0	N
chr13	32907329	32907329	G	A	exonic	BRCA2	nonsynonymous SNV	p.V572I	c.1714G>A	rs587782713	1	0	0	N
chr13	32912466	32912469	TGCT	-	exonic	BRCA2	frameshift deletion	p.A1327Cfs*4	c.3974_3975insAGCG		1	0	0
chr13	32912864	32912864	C	T	exonic	BRCA2	nonsynonymous SNV	p.H1458Y	c.4372C>T	rs80358672	1	0	0	N
chr13	32914782	32914782	C	T	exonic	BRCA2	nonsynonymous SNV	p.T2097M	c.6290C>T	rs80358866	1	0	0	N	ID=COSM416389,COSM416390;OCCURENCE=1(urinary_tract)
chr13	32936829	32936829	A	G	exonic	BRCA2	nonsynonymous SNV	p.R2659G	c.7975A>G	rs80359026	1	0	0	D		Ovarian Cancer,EL:1:Rucaparib, Niraparib(27908594, 27717299, 28229583) ; Ovarian Cancer,EL:2A:Olaparib(19553641, 20406929, 21862407, 25366685, 20609468)
chr13	32954030	32954030	A	-	exonic	BRCA2	frameshift deletion	p.T3033Lfs*29	c.9097delA		1	0	0
chr13	32968913	32968913	A	G	exonic	BRCA2	nonsynonymous SNV	p.K3115R	c.9344A>G	rs276174923	1	0	0	D		Ovarian Cancer,EL:1:Rucaparib, Niraparib(27908594, 27717299, 28229583) ; Ovarian Cancer,EL:2A:Olaparib(19553641, 20406929, 21862407, 25366685, 20609468)
chr13	48919218	48919218	T	A	exonic	RB1	nonsynonymous SNV	p.V128D	c.383T>A		1	0	0	D
chr13	48919232	48919232	A	-	exonic	RB1	frameshift deletion	p.N133	c.397_399		1	0	0		ID=COSM6438188;OCCURENCE=1(large_intestine)
chr13	48919254	48919254	C	T	exonic	RB1	nonsynonymous SNV	p.T140I	c.419C>T		1	0	0	N
chr13	48919260	48919260	C	G	exonic	RB1	nonsynonymous SNV	p.T142S	c.425C>G		1	0	0	D
chr13	48919281	48919281	C	T	exonic	RB1	nonsynonymous SNV	p.S149L	c.446C>T	rs587778870	1	0	0	D
chr13	48942685	48942685	C	T	exonic	RB1	stopgain	p.R358	c.1072_1074	rs121913301	1	0	0		ID=COSM879,COSM4776098;OCCURENCE=1(haematopoietic_and_lymphoid_tissue),1(skin),1(cervix),7(eye),2(central_nervous_system)
chr13	48942722	48942722	C	T	exonic	RB1	nonsynonymous SNV	p.P370L	c.1109C>T		1	0	0	D	ID=COSM6438190;OCCURENCE=1(large_intestine)
chr13	48955538	48955538	C	T	exonic	RB1	stopgain	p.R552	c.1654_1656	rs121913303	1	0	0		ID=COSM1300225,COSM887;OCCURENCE=1(breast),1(bone),1(stomach),1(urinary_tract),2(liver),1(large_intestine),3(eye)
chr13	48955541	48955541	T	C	exonic	RB1	nonsynonymous SNV	p.C553R	c.1657T>C		1	0	0	D
chr13	48955556	48955556	A	C	exonic	RB1	nonsynonymous SNV	p.M558L	c.1672A>C		1	0	0	N
chr13	48955559	48955559	G	T	exonic	RB1	stopgain	p.E559	c.1675_1677		1	0	0
chr13	49027143	49027143	T	-	exonic	RB1	frameshift deletion	p.F570Lfs*41	c.1710delT		1	0	0
chr13	49027162	49027162	A	G	exonic	RB1	nonsynonymous SNV	p.K577E	c.1729A>G		1	0	0	D
chr13	49027163	49027163	A	T	exonic	RB1	nonsynonymous SNV	p.K577M	c.1730A>T		1	0	0	D
chr13	49027168	49027168	C	T	exonic	RB1	stopgain	p.R579	c.1735_1737	rs121913305	1	0	0		ID=COSM1756816,COSM892;OCCURENCE=2(haematopoietic_and_lymphoid_tissue),2(urinary_tract),5(skin),2(lung),2(upper_aerodigestive_tract),3(eye),1(biliary_tract)
chr13	49027178	49027178	C	T	exonic	RB1	nonsynonymous SNV	p.P582L	c.1745C>T		1	0	0	D
chr13	49027181	49027181	C	T	exonic	RB1	nonsynonymous SNV	p.T583I	c.1748C>T		1	0	0	D
chr13	49027187	49027187	A	G	exonic	RB1	nonsynonymous SNV	p.H585R	c.1754A>G		1	0	0	D
chr13	49027205	49027205	C	T	exonic	RB1	nonsynonymous SNV	p.P591L	c.1772C>T		1	0	0	N
chr13	49027222	49027222	C	T	exonic	RB1	stopgain	p.Q597	c.1789_1791		1	0	0		ID=COSM1731706,COSM1731707;OCCURENCE=1(haematopoietic_and_lymphoid_tissue),2(skin)
chr13	49027228	49027228	A	T	exonic	RB1	nonsynonymous SNV	p.N599Y	c.1795A>T		1	0	0	D
chr13	49027235	49027235	C	T	exonic	RB1	nonsynonymous SNV	p.T601I	c.1802C>T		1	0	0	D
chr13	49027238	49027238	C	T	exonic	RB1	nonsynonymous SNV	p.A602V	c.1805C>T		1	0	0	D
chr13	49027240	49027240	G	C	exonic	RB1	nonsynonymous SNV	p.A603P	c.1807G>C		1	0	0	D
chr13	49033859	49033859	T	A	exonic	RB1	nonsynonymous SNV	p.C666	c.1996_1998		1	0	0	D
chr13	49033875	49033875	C	T	exonic	RB1	nonsynonymous SNV	p.S671F	c.2012C>T		1	0	0	D
chr13	49033904	49033904	T	A	exonic	RB1	nonsynonymous SNV	p.W681R	c.2041T>A		1	0	0	D
chr13	49033919	49033919	C	T	exonic	RB1	nonsynonymous SNV	p.H686Y	c.2056C>T		1	0	0	D	ID=COSM6438179;OCCURENCE=2(large_intestine)
chr13	49033943	49033943	C	T	exonic	RB1	nonsynonymous SNV	p.L694F	c.2080C>T		1	0	0	D
chr13	49033946	49033946	A	C	exonic	RB1	nonsynonymous SNV	p.M695L	c.2083A>C		1	0	0	D
chr13	49033956	49033956	G	T	exonic	RB1	nonsynonymous SNV	p.R698M	c.2093G>T		1	0	0	D
chr13	49037875	49037875	G	C	exonic	RB1	nonsynonymous SNV	p.M705I	c.2115G>C		1	0	0	D
chr13	49037885	49037885	T	G	exonic	RB1	nonsynonymous SNV	p.Y709	c.2125_2127		1	0	0	D
chr13	49037885	49037895	TATGGCATATG	-	exonic	RB1	frameshift deletion	p.Y709	c.2125_2127		1	0	0
chr13	49037916	49037916	T	C	exonic	RB1	nonsynonymous SNV	p.L719P	c.2156T>C		1	0	0	D
chr13	49037926	49037926	A	C	exonic	RB1	nonsynonymous SNV	p.K722N	c.2166A>C		1	0	0	D
chr13	49039165	49039165	A	T	exonic	RB1	nonsynonymous SNV	p.E748V	c.2243A>T		1	0	0	D
chr13	49039171	49039171	A	T	exonic	RB1	nonsynonymous SNV	p.D750V	c.2249A>T		1	0	0	D
chr13	49039174	49039174	C	T	exonic	RB1	nonsynonymous SNV	p.S751F	c.2252C>T		1	0	0	D
chr13	49039207	49039207	A	T	exonic	RB1	nonsynonymous SNV	p.Q762L	c.2285A>T		1	0	0	D
chr13	49039218	49039218	A	C	exonic	RB1	nonsynonymous SNV	p.T766P	c.2296A>C		1	0	0	D
chr13	49039218	49039218	A	T	exonic	RB1	nonsynonymous SNV	p.T766S	c.2296A>T		1	0	0	D
chr13	49039241	49039241	C	-	exonic	RB1	frameshift deletion	p.T774Pfs*36	c.2319delC		1	0	0
chr13	49039245	49039245	A	T	exonic	RB1	nonsynonymous SNV	p.R775W	c.2323A>T		1	0	0	D
chr14	105246457	105246457	C	T	exonic	AKT1	nonsynonymous SNV	p.R48H	c.143G>A	rs774836044	0	1	0	N	ID=COSM1368558;OCCURENCE=1(large_intestine)
chr14	105246464	105246464	C	T	exonic	AKT1	nonsynonymous SNV	p.D46N	c.136G>A		0	1	0	N
chr14	105246469	105246469	T	C	exonic	AKT1	nonsynonymous SNV	p.D44G	c.131A>G		0	1	0	N
chr14	105246475	105246475	G	T	exonic	AKT1	nonsynonymous SNV	p.P42Q	c.125C>A		0	1	0	N
chr14	105246478	105246478	C	T	exonic	AKT1	nonsynonymous SNV	p.R41Q	c.122G>A	rs766000895	0	1	0	N
chr14	105246515	105246515	G	C	exonic	AKT1	nonsynonymous SNV	p.L29V	c.85C>G		0	1	0	D
chr14	105246526	105246526	C	T	exonic	AKT1	nonsynonymous SNV	p.R25H	c.74G>A		0	1	0	D
chr14	105246532	105246532	C	T	exonic	AKT1	nonsynonymous SNV	p.R23Q	c.68G>A		0	1	0	D	ID=COSM3770600;OCCURENCE=1(soft_tissue)
chr14	105246551	105246551	C	T	exonic	AKT1	nonsynonymous SNV	p.E17K	c.49G>A	rs121434592	0	1	E17K	N	ID=COSM33765;OCCURENCE=5(salivary_gland),3(ovary),15(bone),109(breast),1(NS),2(stomach),2(haematopoietic_and_lymphoid_tissue),1(kidney),16(urinary_tract),17(soft_tissue),4(pancreas),2(peritoneum),57(skin),9(prostate),16(lung),2(cervix),14(thyroid),58(meninges),8(upper_aerodigestive_tract),1(thymus),28(large_intestine),1(central_nervous_system),2(biliary_tract),15(endometrium)
chr14	105246553	105246553	C	T	exonic	AKT1	nonsynonymous SNV	p.G16E	c.47G>A		0	1	0	D	ID=COSM5991560;OCCURENCE=1(skin)
chr15	90631832	90631832	G	A	exonic	IDH2	nonsynonymous SNV	p.A174V	c.521C>T		0	1	0	D
chr15	90631838	90631838	C	A	exonic	IDH2	nonsynonymous SNV	p.R172M	c.515G>T	rs121913503	0	1	R172M	D	ID=COSM33732;OCCURENCE=2(bone),3(haematopoietic_and_lymphoid_tissue),1(soft_tissue),25(central_nervous_system),1(biliary_tract)
chr16	68835642	68835642	G	T	exonic	CDH1	nonsynonymous SNV	p.G78V	c.233G>T		1	0	0	N
chr16	68835645	68835645	C	T	exonic	CDH1	nonsynonymous SNV	p.T79I	c.236C>T		1	0	0	N
chr16	68835669	68835669	G	C	exonic	CDH1	nonsynonymous SNV	p.R87T	c.260G>C		1	0	0	D	ID=COSM6196846;OCCURENCE=1(large_intestine)
chr16	68835671	68835671	C	T	exonic	CDH1	nonsynonymous SNV	p.P88S	c.262C>T	rs779313390	1	0	0	N
chr16	68835677	68835677	C	T	exonic	CDH1	nonsynonymous SNV	p.R90W	c.268C>T	rs730881661	1	0	0	N
chr16	68835686	68835686	A	T	exonic	CDH1	nonsynonymous SNV	p.N93Y	c.277A>T		1	0	0	N
chr16	68835711	68835711	A	T	exonic	CDH1	nonsynonymous SNV	p.Y101F	c.302A>T		1	0	0	N
chr16	68835714	68835714	C	T	exonic	CDH1	nonsynonymous SNV	p.A102V	c.305C>T	rs786202689	1	0	0	D
chr16	68835726	68835726	C	T	exonic	CDH1	nonsynonymous SNV	p.T106I	c.317C>T		1	0	0	N	ID=COSM6196849;OCCURENCE=1(large_intestine)
chr16	68835750	68835750	T	C	exonic	CDH1	nonsynonymous SNV	p.V114A	c.341T>C		1	0	0	D
chr16	68846165	68846165	C	T	exonic	CDH1	nonsynonymous SNV	p.T379M	c.1136C>T	rs587782856	1	0	0	N	ID=COSM1128899;OCCURENCE=1(liver),1(prostate)
chr16	68847276	68847276	G	T	exonic	CDH1	nonsynonymous SNV	p.D400Y	c.1198G>T		1	0	0	D	ID=COSM20771;OCCURENCE=1(stomach)
chr16	68847310	68847310	C	T	exonic	CDH1	nonsynonymous SNV	p.A411V	c.1232C>T		1	0	0	N
chr16	68847337	68847337	G	T	exonic	CDH1	nonsynonymous SNV	p.G420V	c.1259G>T		1	0	0	N
chr16	68847355	68847355	C	T	exonic	CDH1	nonsynonymous SNV	p.T426I	c.1277C>T	rs876658901	1	0	0	N
chr16	68847357	68847357	A	T	exonic	CDH1	nonsynonymous SNV	p.T427S	c.1279A>T		1	0	0	N
chr16	68847370	68847370	A	T	exonic	CDH1	nonsynonymous SNV	p.N431I	c.1292A>T		1	0	0	N
chr16	68847370	68847370	A	G	exonic	CDH1	nonsynonymous SNV	p.N431S	c.1292A>G		1	0	0	N
chr16	68847375	68847375	G	T	exonic	CDH1	nonsynonymous SNV	p.D433Y	c.1297G>T		1	0	0	N
chr16	68847391	68847391	C	T	exonic	CDH1	nonsynonymous SNV	p.T438I	c.1313C>T		1	0	0	N
chr17	7574001	7574001	C	T	exonic	TP53	synonymous SNV	p.R342	c.1024_1026		1	0	0
chr17	7574002	7574002	C	T	exonic	TP53	nonsynonymous SNV	p.R342Q	c.1025G>A	rs375338359	1	0	0	D	ID=COSM45278;OCCURENCE=2(upper_aerodigestive_tract)
chr17	7574005	7574005	A	T	exonic	TP53	nonsynonymous SNV	p.F341Y	c.1022T>A		1	0	0	D
chr17	7574026	7574026	C	T	exonic	TP53	nonsynonymous SNV	p.G334E	c.1001G>A		1	0	0	D
chr17	7577020	7577020	C	T	exonic	TP53	synonymous SNV	p.R306	c.916_918		1	0	0
chr17	7577023	7577023	A	T	exonic	TP53	synonymous SNV	p.K305	c.913_915		1	0	0		ID=COSM46382;OCCURENCE=1(urinary_tract)
chr17	7577046	7577046	C	T	exonic	TP53	nonsynonymous SNV	p.E298K	c.892G>A	rs201744589	1	0	0	D	ID=COSM44031;OCCURENCE=1(haematopoietic_and_lymphoid_tissue),1(endometrium)
chr17	7577069	7577069	C	T	exonic	TP53	nonsynonymous SNV	p.R290H	c.869G>A	rs55819519	1	0	0	D	ID=COSM1386594,COSM44017,COSM4340368,COSM4340369;OCCURENCE=1(breast),1(NS),5(haematopoietic_and_lymphoid_tissue),1(stomach),2(urinary_tract),3(skin),6(upper_aerodigestive_tract),1(large_intestine),1(central_nervous_system)
chr17	7577090	7577090	C	T	exonic	TP53	nonsynonymous SNV	p.R283H	c.848G>A	rs371409680	1	0	0	D	ID=COSM2744522,COSM4271753,COSM2744523,COSM11483;OCCURENCE=2(haematopoietic_and_lymphoid_tissue),1(stomach),5(urinary_tract),1(oesophagus),1(lung),1(cervix),3(large_intestine),1(endometrium)
chr17	7577094	7577094	G	A	exonic	TP53	nonsynonymous SNV	p.R282W	c.844C>T	rs28934574	1	0	R282W	D	ID=COSM10704,COSM1636702,COSM3378339,COSM99925;OCCURENCE=1(salivary_gland),6(vulva),20(ovary),3(bone),33(breast),2(NS),13(haematopoietic_and_lymphoid_tissue),47(stomach),1(soft_tissue),13(urinary_tract),2(kidney),34(pancreas),2(peritoneum),7(liver),76(oesophagus),16(skin),7(prostate),25(lung),2(thyroid),54(upper_aerodigestive_tract),1(thymus),197(large_intestine),41(central_nervous_system),3(smal…
chr17	7577102	7577102	C	T	exonic	TP53	nonsynonymous SNV	p.G279E	c.836G>A	rs1064793881	1	0	I229-292E	D	ID=COSM3701289,COSM3701288,COSM99732,COSM43714;OCCURENCE=1(ovary),1(bone),3(breast),1(NS),1(haematopoietic_and_lymphoid_tissue),3(urinary_tract),2(liver),6(oesophagus),8(skin),1(prostate),1(lung),8(upper_aerodigestive_tract),3(large_intestine),2(central_nervous_system),1(small_intestine),1(endometrium)
chr17	7577117	7577117	A	T	exonic	TP53	nonsynonymous SNV	p.V274D	c.821T>A	rs1057520006	1	0	V274D	D	ID=COSM1640827,COSM165076,COSM44448,COSM4749451;OCCURENCE=2(ovary),2(breast),2(haematopoietic_and_lymphoid_tissue),2(stomach),1(soft_tissue),1(urinary_tract),1(lung),1(large_intestine)
chr17	7577118	7577118	C	A	exonic	TP53	nonsynonymous SNV	p.V274F	c.820G>T	rs1057520005	1	0	V274F	D	ID=COSM165075,COSM3388171,COSM1679490,COSM10769;OCCURENCE=3(ovary),3(breast),1(NS),1(urinary_tract),3(pancreas),1(peritoneum),3(liver),4(oesophagus),1(adrenal_gland),4(prostate),2(lung),1(upper_aerodigestive_tract),4(large_intestine)
chr17	7577120	7577120	C	T	exonic	TP53	nonsynonymous SNV	p.R273H	c.818G>A	rs28934576	1	0	R273H	D	ID=COSM1645335,COSM10660,COSM99729,COSM3356963;OCCURENCE=3(salivary_gland),1(pleura),4(vulva),60(ovary),8(bone),93(breast),4(NS),4(penis),36(stomach),47(haematopoietic_and_lymphoid_tissue),4(soft_tissue),2(kidney),19(urinary_tract),43(pancreas),5(liver),2(genital_tract),45(oesophagus),15(skin),13(prostate),87(lung),1(cervix),48(upper_aerodigestive_tract),2(thymus),198(large_intestine),61(central_…
chr17	7577121	7577121	G	A	exonic	TP53	nonsynonymous SNV	p.R273C	c.817C>T	rs121913343	1	0	R273C	D	ID=COSM99933,COSM10659,COSM3355991,COSM1645518;OCCURENCE=2(salivary_gland),2(pleura),36(ovary),10(vulva),12(bone),34(breast),1(NS),1(penis),38(stomach),45(haematopoietic_and_lymphoid_tissue),3(kidney),15(urinary_tract),23(pancreas),1(peritoneum),22(liver),1(genital_tract),28(oesophagus),4(adrenal_gland),13(skin),18(prostate),25(lung),5(cervix),4(thyroid),36(upper_aerodigestive_tract),1(eye),174(l…
chr17	7577127	7577127	C	T	exonic	TP53	nonsynonymous SNV	p.E271K	c.811G>A	rs1060501191	1	0	E271K	D	ID=COSM10719,COSM1646807,COSM254988,COSM3403256;OCCURENCE=1(salivary_gland),1(ovary),2(breast),2(haematopoietic_and_lymphoid_tissue),2(stomach),18(urinary_tract),2(pancreas),1(liver),1(oesophagus),2(skin),5(lung),2(cervix),1(upper_aerodigestive_tract),5(large_intestine),2(central_nervous_system),1(biliary_tract)
chr17	7577129	7577129	A	G	exonic	TP53	nonsynonymous SNV	p.F270S	c.809T>C	rs1057519986	1	0	F270S	D	ID=COSM437483,COSM3970342,COSM11305,COSM3970341;OCCURENCE=1(salivary_gland),1(ovary),4(breast),1(NS),1(haematopoietic_and_lymphoid_tissue),1(stomach),1(pancreas),2(oesophagus),1(upper_aerodigestive_tract),3(large_intestine),1(thymus),3(central_nervous_system),1(endometrium)
chr17	7577129	7577129	T	C	exonic	TP53	nonsynonymous SNV	p.F270H	c.808_809delTTinsCA	rs1057519986	1	0	I229-292H		ID=COSM1522199,COSM43621,COSM4413237,COSM4413236;OCCURENCE=1(ovary),3(breast),1(urinary_tract),2(liver),7(oesophagus),3(lung),2(upper_aerodigestive_tract),1(large_intestine)
chr17	7577130	7577130	A	G	exonic	TP53	nonsynonymous SNV	p.F270L	c.808T>C		1	0	F270L	D	ID=COSM4070035,COSM44262,COSM165083,COSM4070034;OCCURENCE=1(bone),2(breast),1(haematopoietic_and_lymphoid_tissue),7(stomach),1(oesophagus),1(upper_aerodigestive_tract),4(large_intestine),1(central_nervous_system),1(biliary_tract)
chr17	7577132	7577132	C	T	exonic	TP53	nonsynonymous SNV	p.S269N	c.806G>A		1	0	0	D	ID=COSM44236;OCCURENCE=4(haematopoietic_and_lymphoid_tissue),1(skin),1(large_intestine)
chr17	7577135	7577135	T	A	exonic	TP53	nonsynonymous SNV	p.N268I	c.803A>T		1	0	I229-292I	D	ID=COSM4271768,COSM2744542,COSM11817,COSM2744541;OCCURENCE=1(pancreas)
chr17	7577138	7577138	C	T	exonic	TP53	nonsynonymous SNV	p.R267Q	c.800G>A	rs587780075	1	0	R267Q	D	ID=COSM3691864,COSM1290766,COSM43923,COSM3691863;OCCURENCE=1(ovary),1(breast),1(stomach),1(haematopoietic_and_lymphoid_tissue),1(urinary_tract),1(kidney),1(oesophagus),1(lung),4(large_intestine),2(central_nervous_system)
chr17	7577139	7577142	CGGA	-	exonic	TP53	frameshift deletion				1	0	0
chr17	7577526	7577526	A	T	exonic	TP53	nonsynonymous SNV	p.L252H	c.755T>A		1	0	0	D	ID=COSM45091;OCCURENCE=1(soft_tissue),1(upper_aerodigestive_tract)
chr17	7577538	7577538	C	T	exonic	TP53	nonsynonymous SNV	p.R248Q	c.743G>A	rs11540652	1	0	R248Q	D	ID=COSM99602,COSM99021,COSM99020,COSM3356964,COSM10662,COSM1640830;OCCURENCE=2(salivary_gland),1(pleura),11(vulva),44(ovary),7(bone),93(breast),5(NS),50(stomach),87(haematopoietic_and_lymphoid_tissue),1(soft_tissue),7(kidney),37(urinary_tract),22(pancreas),1(peritoneum),9(liver),1(genital_tract),54(oesophagus),2(adrenal_gland),1(pituitary),21(skin),27(prostate),35(lung),5(thyroid),4(cervix),48(up…
chr17	7577539	7577539	G	A	exonic	TP53	nonsynonymous SNV	p.R248W	c.742C>T	rs121912651	1	0	R248W	D	ID=COSM120006,COSM120005,COSM1640831,COSM10656,COSM3388183,COSM120007;OCCURENCE=1(pleura),4(vulva),36(ovary),2(bone),84(breast),1(penis),8(NS),44(haematopoietic_and_lymphoid_tissue),39(stomach),5(soft_tissue),11(kidney),22(urinary_tract),20(pancreas),5(liver),53(oesophagus),39(skin),7(prostate),25(lung),1(cervix),4(thyroid),35(upper_aerodigestive_tract),1(thymus),186(large_intestine),40(central_n…
chr17	7577540	7577542	ACC	-	exonic	TP53	nonframeshift deletion	p.N247delN	c.739_741delAAC		1	0	N247N
chr17	7577548	7577548	C	T	exonic	TP53	nonsynonymous SNV	p.G245S	c.733G>A	rs28934575	1	0	G245S	D	ID=COSM3356965,COSM1640833,COSM121037,COSM121035,COSM121036,COSM6932;OCCURENCE=3(salivary_gland),6(vulva),24(ovary),31(breast),3(NS),45(stomach),26(haematopoietic_and_lymphoid_tissue),1(soft_tissue),1(kidney),12(urinary_tract),15(pancreas),4(liver),25(oesophagus),9(skin),6(prostate),10(lung),1(cervix),15(upper_aerodigestive_tract),144(large_intestine),28(central_nervous_system),4(small_intestine)…
chr17	7577552	7577552	C	G	exonic	TP53	nonsynonymous SNV	p.M243I	c.729G>C		1	0	I229-292I	D	ID=COSM46228;OCCURENCE=2(breast)
chr17	7577559	7577559	G	C	exonic	TP53	nonsynonymous SNV	p.S241C	c.722C>G	rs28934573	1	0	S241C	D	ID=COSM3362448,COSM2744619,COSM437502,COSM437503,COSM437501,COSM10709;OCCURENCE=2(ovary),3(breast),1(NS),5(stomach),5(haematopoietic_and_lymphoid_tissue),5(urinary_tract),2(kidney),1(liver),3(oesophagus),4(lung),1(upper_aerodigestive_tract),2(large_intestine),3(biliary_tract),5(endometrium)
chr17	7577559	7577559	C	-	exonic	TP53	frameshift deletion	p.C242Afs*5	c.723delC		1	0	S2415		ID=COSM44657;OCCURENCE=1(ovary),2(breast),1(bone),1(haematopoietic_and_lymphoid_tissue),1(oesophagus),1(thyroid)
chr17	7577560	7577560	A	T	exonic	TP53	nonsynonymous SNV	p.S241T	c.721T>A		1	0	S241T	D	ID=COSM303889,COSM303888,COSM303890,COSM5752584,COSM44067,COSM5752585;OCCURENCE=1(breast),1(NS),2(haematopoietic_and_lymphoid_tissue),2(urinary_tract),1(oesophagus),1(upper_aerodigestive_tract)
chr17	7577568	7577568	C	T	exonic	TP53	nonsynonymous SNV	p.C238Y	c.713G>A	rs730882005	1	0	C238Y	D	ID=COSM179813,COSM179811,COSM1649400,COSM11059,COSM179812,COSM3388191;OCCURENCE=10(ovary),1(bone),14(breast),3(stomach),13(haematopoietic_and_lymphoid_tissue),5(soft_tissue),9(pancreas),13(oesophagus),1(skin),3(lung),1(upper_aerodigestive_tract),14(large_intestine),7(central_nervous_system),3(endometrium)
chr17	7577570	7577570	C	G	exonic	TP53	nonsynonymous SNV	p.M237I	c.711G>C	rs587782664	1	0	M237I	D	ID=COSM44415,COSM1189384,COSM1189385,COSM1189386;OCCURENCE=3(breast),1(lung),3(upper_aerodigestive_tract),3(large_intestine)
chr17	7577575	7577575	A	T	exonic	TP53	nonsynonymous SNV	p.Y236N	c.706T>A	rs587782289	1	0	Y236N	D	ID=COSM1644276,COSM1157853,COSM3388353,COSM43826,COSM1157851,COSM1157852;OCCURENCE=1(breast),6(haematopoietic_and_lymphoid_tissue),1(stomach),3(pancreas),2(oesophagus),3(skin),4(upper_aerodigestive_tract),1(large_intestine),1(central_nervous_system)
chr17	7577595	7577596	GT	-	exonic	TP53	frameshift deletion	p.C229Yfs*10	c.686_687delGT		1	0	0		ID=COSM43648;OCCURENCE=2(ovary),1(haematopoietic_and_lymphoid_tissue),1(urinary_tract),1(pancreas),1(skin)
chr17	7577605	7577605	C	A	exonic	TP53	nonsynonymous SNV	p.G226C	c.676G>T		1	0	0	D
chr17	7577608	7577608	C	T	exonic	TP53	nonsynonymous SNV	p.V225I	c.673G>A		1	0	0	D	ID=COSM45353;OCCURENCE=2(upper_aerodigestive_tract)
chr17	7578177	7578177	C	G	exonic	TP53	nonsynonymous SNV	p.E224D	c.672G>C		1	0	0	D	ID=COSM707901,COSM707900,COSM707899,COSM44945,COSM4860011,COSM1646847;OCCURENCE=2(breast),1(bone),1(haematopoietic_and_lymphoid_tissue),3(lung),1(large_intestine)
chr17	7578190	7578190	T	C	exonic	TP53	nonsynonymous SNV	p.Y220C	c.659A>G	rs121912666	1	0	Y220C	D	ID=COSM99720,COSM99718,COSM3355993,COSM99719,COSM10758,COSM1644277;OCCURENCE=2(salivary_gland),1(vulva),46(ovary),2(bone),43(breast),1(NS),15(stomach),33(haematopoietic_and_lymphoid_tissue),10(soft_tissue),1(kidney),16(urinary_tract),10(pancreas),1(peritoneum),12(liver),37(oesophagus),2(skin),10(prostate),32(lung),31(upper_aerodigestive_tract),25(large_intestine),24(central_nervous_system),3(smal…
chr17	7578190	7578190	A	-	exonic	TP53	frameshift deletion	p.Y220Lfs*27	c.659delA		1	0	Y2207
chr17	7578203	7578203	C	T	exonic	TP53	nonsynonymous SNV	p.V216M	c.646G>A	rs730882025	1	0	V216M	D	ID=COSM3388195,COSM120097,COSM120096,COSM1644280,COSM120098,COSM120095,COSM10667;OCCURENCE=1(salivary_gland),1(vulva),1(pleura),7(ovary),2(bone),16(breast),1(NS),4(stomach),16(haematopoietic_and_lymphoid_tissue),2(soft_tissue),3(pancreas),3(liver),10(oesophagus),5(lung),8(upper_aerodigestive_tract),7(large_intestine),8(central_nervous_system),1(endometrium)
chr17	7578204	7578204	A	C	exonic	TP53	nonsynonymous SNV	p.S215R	c.645T>G	rs1057520001	1	0	S215R	D	ID=COSM220771,COSM4432875,COSM220773,COSM44979,COSM220772,COSM220770,COSM4432874;OCCURENCE=1(salivary_gland),1(ovary),3(breast),2(stomach),7(haematopoietic_and_lymphoid_tissue),2(oesophagus),1(skin),2(large_intestine)
chr17	7578210	7578210	C	T	exonic	TP53	synonymous SNV	p.R213	c.637_639		1	0	0
chr17	7578211	7578211	C	T	exonic	TP53	nonsynonymous SNV	p.R213Q	c.638G>A	rs587778720	1	0	R213Q	D	ID=COSM3403265,COSM1726594,COSM10735,COSM131466,COSM131469,COSM131468,COSM131467;OCCURENCE=1(vulva),1(breast),8(haematopoietic_and_lymphoid_tissue),3(stomach),1(soft_tissue),2(kidney),4(urinary_tract),9(liver),3(oesophagus),2(skin),1(upper_aerodigestive_tract),1(thymus),7(large_intestine),1(central_nervous_system),1(biliary_tract),2(endometrium)
chr17	7578215	7578215	A	G	exonic	TP53	nonsynonymous SNV	p.F212L	c.634T>C		1	0	0	D	ID=COSM45477;OCCURENCE=1(upper_aerodigestive_tract)
chr17	7578245	7578245	G	A	exonic	TP53	nonsynonymous SNV	p.R202C	c.604C>T	rs587780072	1	0	0	D	ID=COSM46074;OCCURENCE=1(urinary_tract),2(upper_aerodigestive_tract),1(endometrium)
chr17	7578260	7578260	C	T	exonic	TP53	nonsynonymous SNV	p.V197M	c.589G>A	rs786204041	1	0	V197M	D	ID=COSM3712580,COSM3712581,COSM43779,COSM3712579,COSM3712583,COSM3712582,COSM3712578;OCCURENCE=1(haematopoietic_and_lymphoid_tissue),1(urinary_tract),1(pancreas),1(oesophagus),2(lung),2(upper_aerodigestive_tract),5(large_intestine)
chr17	7578261	7578261	C	T	exonic	TP53	synonymous SNV	p.R196	c.586_588		1	0	0
chr17	7578265	7578265	A	G	exonic	TP53	nonsynonymous SNV	p.I195T	c.584T>C	rs760043106	1	0	I195T	D	ID=COSM3421936,COSM116924,COSM116923,COSM116922,COSM11089,COSM116921,COSM1645297;OCCURENCE=1(pleura),31(ovary),24(breast),4(stomach),5(haematopoietic_and_lymphoid_tissue),2(urinary_tract),4(pancreas),3(liver),6(oesophagus),1(prostate),3(lung),3(upper_aerodigestive_tract),14(large_intestine),8(central_nervous_system),1(small_intestine),2(biliary_tract),4(endometrium)
chr17	7578269	7578269	G	A	exonic	TP53	nonsynonymous SNV	p.L194F	c.580C>T	rs587780071	1	0	L194F	D	ID=COSM4271890,COSM376382,COSM376383,COSM1679502,COSM10995,COSM376381,COSM376384;OCCURENCE=2(ovary),2(breast),1(NS),1(haematopoietic_and_lymphoid_tissue),5(stomach),1(urinary_tract),1(pancreas),2(oesophagus),4(skin),2(lung),1(cervix),1(upper_aerodigestive_tract),6(large_intestine)
chr17	7578271	7578271	T	G	exonic	TP53	nonsynonymous SNV	p.H193P	c.578A>C	rs786201838	1	0	H193P	D	ID=COSM131459,COSM131461,COSM131460,COSM43833,COSM3970354,COSM131458,COSM3970355;OCCURENCE=2(breast),1(NS),2(haematopoietic_and_lymphoid_tissue),1(kidney),3(liver),1(oesophagus),1(lung),3(upper_aerodigestive_tract),2(large_intestine),2(central_nervous_system),1(endometrium)
chr17	7578272	7578272	G	A	exonic	TP53	nonsynonymous SNV	p.H193Y	c.577C>T	rs876658468	1	0	H193Y	D	ID=COSM437530,COSM1731184,COSM437532,COSM3388200,COSM437529,COSM10672,COSM437531;OCCURENCE=1(salivary_gland),2(ovary),1(pleura),5(breast),1(bone),1(stomach),4(haematopoietic_and_lymphoid_tissue),1(soft_tissue),2(urinary_tract),1(kidney),6(pancreas),1(liver),9(oesophagus),1(adrenal_gland),1(prostate),5(lung),5(upper_aerodigestive_tract),1(thymus),6(large_intestine),3(central_nervous_system),1(bili…
chr17	7578280	7578280	G	A	exonic	TP53	nonsynonymous SNV	p.P190L	c.569C>T	rs876660825	1	0	P190L	D	ID=COSM43657,COSM1386775,COSM1386773,COSM1386772,COSM1386774,COSM3356968,COSM2152692;OCCURENCE=1(vulva),4(breast),1(NS),2(stomach),4(haematopoietic_and_lymphoid_tissue),1(pancreas),2(liver),4(oesophagus),2(skin),1(prostate),2(upper_aerodigestive_tract),10(large_intestine),3(central_nervous_system)
chr17	7578284	7578284	C	G	exonic	TP53	nonsynonymous SNV	p.A189P	c.565G>C		1	0	0	D	ID=COSM6903988,COSM44923,COSM6903992,COSM6903991,COSM6903987,COSM6903990,COSM6903989;OCCURENCE=2(ovary),1(skin)
chr17	7578388	7578388	C	G	exonic	TP53	nonsynonymous SNV	p.R181P	c.542G>C		1	0	R181P	D	ID=COSM4947132,COSM99659,COSM45046,COSM99658,COSM4947133,COSM99660,COSM99661;OCCURENCE=2(ovary),2(breast),1(haematopoietic_and_lymphoid_tissue),1(urinary_tract),1(liver),6(lung),2(upper_aerodigestive_tract),2(large_intestine)
chr17	7578395	7578395	G	A	exonic	TP53	nonsynonymous SNV	p.H179Y	c.535C>T	rs587780070	1	0	H179Y	D	ID=COSM129849,COSM10768,COSM129848,COSM129851,COSM129850,COSM3388203,COSM1709730;OCCURENCE=1(vulva),6(ovary),1(bone),8(breast),7(NS),5(stomach),9(haematopoietic_and_lymphoid_tissue),2(soft_tissue),4(urinary_tract),3(pancreas),4(liver),12(oesophagus),16(skin),1(prostate),12(lung),1(thyroid),10(upper_aerodigestive_tract),1(eye),12(large_intestine),6(central_nervous_system),1(small_intestine),3(endo…
chr17	7578403	7578403	C	T	exonic	TP53	nonsynonymous SNV	p.C176Y	c.527G>A	rs786202962	1	0	C176Y	D	ID=COSM3388204,COSM99670,COSM99671,COSM10687,COSM99669,COSM1649384,COSM99672;OCCURENCE=1(salivary_gland),6(ovary),2(bone),5(breast),1(NS),3(stomach),8(haematopoietic_and_lymphoid_tissue),1(urinary_tract),2(pancreas),7(liver),14(oesophagus),2(skin),12(lung),6(upper_aerodigestive_tract),22(large_intestine),7(central_nervous_system),2(biliary_tract),1(endometrium)
chr17	7578404	7578404	A	G	exonic	TP53	nonsynonymous SNV	p.C176R	c.526T>C		1	0	C176R	D	ID=COSM44948,COSM1172482,COSM1172481,COSM1172483,COSM3672588,COSM1645227,COSM1172480;OCCURENCE=3(breast),1(stomach),3(haematopoietic_and_lymphoid_tissue),1(kidney),2(oesophagus),1(prostate),1(upper_aerodigestive_tract),5(large_intestine),3(central_nervous_system)
chr17	7578406	7578406	C	T	exonic	TP53	nonsynonymous SNV	p.R175H	c.524G>A	rs28934578	1	0	R175H	D	ID=COSM10648,COSM3355994,COSM99022,COSM1640851,COSM99024,COSM99023,COSM99914;OCCURENCE=11(salivary_gland),2(pleura),9(vulva),73(ovary),5(bone),129(breast),1(penis),4(NS),88(stomach),57(haematopoietic_and_lymphoid_tissue),1(soft_tissue),18(kidney),30(urinary_tract),47(pancreas),1(peritoneum),11(liver),100(oesophagus),4(adrenal_gland),7(skin),8(prostate),23(lung),2(thyroid),4(cervix),79(upper_aerod…
chr17	7578413	7578413	C	G	exonic	TP53	nonsynonymous SNV	p.V173L	c.517G>C		1	0	V173L	D	ID=COSM121044,COSM121042,COSM121045,COSM121043,COSM1741210,COSM3970358,COSM44057;OCCURENCE=1(ovary),2(breast),2(stomach),2(haematopoietic_and_lymphoid_tissue),3(pancreas),2(oesophagus),1(skin),4(upper_aerodigestive_tract),1(large_intestine),1(central_nervous_system),1(biliary_tract),1(endometrium)
chr17	7578413	7578413	C	T	exonic	TP53	nonsynonymous SNV	p.V173M	c.517G>A	rs876660754	1	0	V173M	D	ID=COSM3388205,COSM98966,COSM121041,COSM2744864,COSM11084,COSM98964,COSM98965;OCCURENCE=1(pleura),5(ovary),3(bone),7(breast),6(haematopoietic_and_lymphoid_tissue),6(stomach),2(soft_tissue),1(urinary_tract),3(kidney),3(pancreas),1(liver),9(oesophagus),1(skin),2(lung),7(upper_aerodigestive_tract),12(large_intestine),2(central_nervous_system)
chr17	7578416	7578416	C	G	exonic	TP53	nonsynonymous SNV	p.V172L	c.514G>C		1	0	0	D
chr17	7578417	7578417	G	T	exonic	TP53	synonymous SNV	p.E171	c.511_513		1	0	0
chr17	7578421	7578422	GA	-	exonic	TP53	frameshift deletion	p.T170Rfs*5	c.508_509insGG		1	0	0
chr17	7578430	7578430	T	A	exonic	TP53	nonsynonymous SNV	p.Q167L	c.500A>T		1	0	0	D	ID=COSM45342;OCCURENCE=2(breast),1(large_intestine)
chr17	7578452	7578452	T	C	exonic	TP53	nonsynonymous SNV	p.M160V	c.478A>G		1	0	-128-163V	D	ID=COSM44328;OCCURENCE=2(breast),1(stomach),1(prostate),1(biliary_tract)
chr17	7578454	7578454	G	A	exonic	TP53	nonsynonymous SNV	p.A159V	c.476C>T		1	0	A159V	D	ID=COSM288921,COSM288919,COSM11148,COSM288920,COSM3388216,COSM288922,COSM2744893;OCCURENCE=5(ovary),6(breast),4(stomach),4(haematopoietic_and_lymphoid_tissue),2(urinary_tract),2(pancreas),4(liver),3(oesophagus),4(skin),1(prostate),10(lung),6(large_intestine),1(central_nervous_system),2(endometrium)
chr17	7578457	7578457	C	A	exonic	TP53	nonsynonymous SNV	p.R158L	c.473G>T		1	0	R158L	D	ID=COSM99677,COSM99676,COSM99678,COSM99675,COSM10714,COSM1649374,COSM3958835;OCCURENCE=1(breast),3(haematopoietic_and_lymphoid_tissue),1(soft_tissue),3(urinary_tract),1(kidney),2(liver),11(oesophagus),50(lung),1(thyroid),4(upper_aerodigestive_tract),1(large_intestine),1(thymus),3(central_nervous_system)
chr17	7578466	7578466	G	A	exonic	TP53	nonsynonymous SNV	p.T155I	c.464C>T		1	0	T155I	D	ID=COSM6082233,COSM6082234,COSM6082235,COSM6082232,COSM6082237,COSM44033,COSM6082236;OCCURENCE=1(ovary),1(breast),2(haematopoietic_and_lymphoid_tissue),1(stomach),1(urinary_tract),1(soft_tissue),2(liver),1(oesophagus),1(adrenal_gland),4(lung),1(large_intestine)
chr17	7578475	7578475	G	A	exonic	TP53	nonsynonymous SNV	p.P152L	c.455C>T	rs587782705	1	0	P152L	D	ID=COSM3717667,COSM129856,COSM129858,COSM10790,COSM1645282,COSM129859,COSM129857;OCCURENCE=4(vulva),1(breast),1(stomach),5(haematopoietic_and_lymphoid_tissue),3(soft_tissue),8(urinary_tract),1(pancreas),4(liver),11(oesophagus),2(adrenal_gland),1(skin),3(prostate),1(lung),8(upper_aerodigestive_tract),21(large_intestine),17(central_nervous_system)
chr17	7578476	7578476	G	A	exonic	TP53	nonsynonymous SNV	p.P152S	c.454C>T	rs767328513	1	0	P152S	D	ID=COSM43582,COSM3403283,COSM3403280,COSM3403278,COSM3403279,COSM3403281,COSM3403282;OCCURENCE=2(breast),2(haematopoietic_and_lymphoid_tissue),2(urinary_tract),1(pancreas),12(skin),5(lung),2(upper_aerodigestive_tract),1(large_intestine),1(central_nervous_system)
chr17	7578484	7578484	G	T	exonic	TP53	nonsynonymous SNV	p.S149Y	c.446C>A		1	0	0	D	ID=COSM5347068;OCCURENCE=1(endometrium)
chr17	7578511	7578511	G	A	exonic	TP53	nonsynonymous SNV	p.T140I	c.419C>T		1	0	0	D	ID=COSM43742;OCCURENCE=2(stomach),1(liver),1(genital_tract),2(skin),1(lung),3(central_nervous_system),1(biliary_tract)
chr17	7578524	7578524	G	T	exonic	TP53	nonsynonymous SNV	p.Q136K	c.406C>A		1	0	0	D	ID=COSM44866;OCCURENCE=1(large_intestine)
chr17	7578525	7578525	G	C	exonic	TP53	nonsynonymous SNV	p.C135W	c.405C>G	rs1057519976	1	0	C135W	D	ID=COSM437602,COSM437604,COSM1640866,COSM437601,COSM437603,COSM4815153,COSM44219;OCCURENCE=1(pleura),4(ovary),8(breast),2(stomach),3(haematopoietic_and_lymphoid_tissue),1(urinary_tract),1(pancreas),2(oesophagus),1(adrenal_gland),2(prostate),1(lung),2(upper_aerodigestive_tract),2(large_intestine),5(central_nervous_system)
chr17	7578526	7578526	C	A	exonic	TP53	nonsynonymous SNV	p.C135F	c.404G>T	rs587781991	1	0	C135F	D	ID=COSM303852,COSM303849,COSM303850,COSM3820723,COSM2744945,COSM10647,COSM303851;OCCURENCE=1(salivary_gland),2(vulva),2(ovary),4(breast),2(bone),1(NS),7(stomach),2(haematopoietic_and_lymphoid_tissue),1(urinary_tract),1(soft_tissue),2(kidney),1(liver),14(oesophagus),1(pituitary),1(adrenal_gland),1(prostate),5(lung),8(upper_aerodigestive_tract),1(eye),10(large_intestine)
chr17	7578535	7578535	T	C	exonic	TP53	nonsynonymous SNV	p.K132R	c.395A>G	rs1057519996	1	0	K132R	D	ID=COSM3388223,COSM11582,COSM1646844,COSM308311,COSM308312,COSM308310;OCCURENCE=11(ovary),8(breast),4(haematopoietic_and_lymphoid_tissue),1(kidney),3(pancreas),1(liver),8(oesophagus),1(prostate),9(lung),1(upper_aerodigestive_tract),9(large_intestine),1(central_nervous_system),1(biliary_tract),3(endometrium)
chr17	7578546	7578546	C	-	exonic	TP53	frameshift deletion	p.P128	c.382_384		1	0	0
chr17	7578552	7578552	C	A	exonic	TP53	synonymous SNV	p.Y126	c.376_378		1	0	0		ID=COSM44196;OCCURENCE=1(central_nervous_system)
chr17	7578554	7578554	A	G	exonic	TP53	nonsynonymous SNV	p.Y126H	c.376T>C		1	0	Y126H	D	ID=COSM4435839,COSM4435840,COSM4435842,COSM4435841,COSM4435843,COSM4435844;OCCURENCE=1(haematopoietic_and_lymphoid_tissue),1(oesophagus)
chr17	7579361	7579361	A	G	exonic	TP53	nonsynonymous SNV	p.F109S	c.326T>C	rs1064796722	1	0	F109S	D	ID=COSM4782283,COSM45169,COSM148181,COSM148180,COSM4782284;OCCURENCE=2(stomach),2(oesophagus),1(skin)
chr17	7579361	7579361	A	T	exonic	TP53	nonsynonymous SNV	p.F109Y	c.326T>A		1	0	0	D
chr17	7579364	7579364	C	T	exonic	TP53	nonsynonymous SNV	p.G108D	c.323G>A		1	0	0	D	ID=COSM45925;OCCURENCE=1(urinary_tract)
chr17	7579470	7579470	C	T	exonic	TP53	nonsynonymous SNV	p.V73M	c.217G>A	rs587782423	1	0	0	N	ID=COSM43787;OCCURENCE=1(urinary_tract),1(liver),1(skin),1(large_intestine)
chr17	7579472	7579472	G	T	exonic	TP53	nonsynonymous SNV	p.P72H	c.215C>A	rs1042522	1	0	0	D	ID=COSM45985;OCCURENCE=2(ovary)
chr17	7579716	7579716	G	C	exonic	TP53	nonsynonymous SNV	p.P27R	c.80C>G		1	0	0	D
chr17	37880229	37880229	A	T	exonic	ERBB2	nonsynonymous SNV	p.N758I	c.2273A>T		0	1	0	D		Non-Small Cell Lung Cancer,EL:3A:Neratinib(23220880) ; Breast Cancer,EL:3A:Neratinib(23220880)
chr17	37880229	37880229	A	-	exonic	ERBB2	frameshift deletion	p.N758Tfs*11	c.2273delA		0	1	0
chr17	37880255	37880255	A	T	exonic	ERBB2	nonsynonymous SNV	p.I767F	c.2299A>T		0	1	0	N
chr17	37880261	37880261	G	T	exonic	ERBB2	nonsynonymous SNV	p.D769Y	c.2305G>T	rs121913468	0	1	D769Y	D	ID=COSM1251412,COSM5219941;OCCURENCE=1(salivary_gland),7(breast),1(stomach),2(oesophagus),1(large_intestine)	Non-Small Cell Lung Cancer,EL:3A:Neratinib(23220880) ; Breast Cancer,EL:3A:Neratinib(23220880)
chr17	37881004	37881004	G	C	exonic	ERBB2	nonsynonymous SNV	p.G778A	c.2333G>C		0	1	0	N
chr17	37881009	37881009	C	T	exonic	ERBB2	nonsynonymous SNV	p.P780S	c.2338C>T		0	1	0	D	ID=COSM6197839;OCCURENCE=1(large_intestine)	Non-Small Cell Lung Cancer,EL:3A:Neratinib(23220880) ; Breast Cancer,EL:3A:Neratinib(23220880)
chr17	37881010	37881010	C	T	exonic	ERBB2	nonsynonymous SNV	p.P780L	c.2339C>T		0	1	0	D		Non-Small Cell Lung Cancer,EL:3A:Neratinib(23220880) ; Breast Cancer,EL:3A:Neratinib(23220880)
chr17	37881075	37881075	C	T	exonic	ERBB2	nonsynonymous SNV	p.P802S	c.2404C>T		0	1	0	N
chr17	37881102	37881102	C	T	exonic	ERBB2	nonsynonymous SNV	p.R811W	c.2431C>T	rs748416534	0	1	0	D		Non-Small Cell Lung Cancer,EL:3A:Neratinib(23220880) ; Breast Cancer,EL:3A:Neratinib(23220880)
chr17	37881107	37881107	A	C	exonic	ERBB2	nonsynonymous SNV	p.E812D	c.2436A>C		0	1	0	N
chr17	37881111	37881111	C	T	exonic	ERBB2	nonsynonymous SNV	p.R784C	c.2350C>T	rs587778267	0	1	0	D		Non-Small Cell Lung Cancer,EL:3A:Neratinib(23220880) ; Breast Cancer,EL:3A:Neratinib(23220880)
chr17	37881338	37881338	A	T	exonic	ERBB2	nonsynonymous SNV	p.R844W	c.2530A>T		0	1	0	D		Non-Small Cell Lung Cancer,EL:3A:Neratinib(23220880) ; Breast Cancer,EL:3A:Neratinib(23220880)
chr17	37881371	37881371	A	G	exonic	ERBB2	nonsynonymous SNV	p.S855G	c.2563A>G	rs765811300	0	1	0	D		Non-Small Cell Lung Cancer,EL:3A:Neratinib(23220880) ; Breast Cancer,EL:3A:Neratinib(23220880)
chr17	37881375	37881375	C	T	exonic	ERBB2	nonsynonymous SNV	p.P856L	c.2567C>T		0	1	0	N
chr17	37881380	37881380	C	T	exonic	ERBB2	nonsynonymous SNV	p.H843Y	c.2527C>T		0	1	0	N
chr17	37881381	37881381	A	T	exonic	ERBB2	nonsynonymous SNV	p.H843L	c.2528A>T		0	1	0	N
chr17	37881425	37881425	G	T	exonic	ERBB2	nonsynonymous SNV	p.D873Y	c.2617G>T		0	1	0	D		Non-Small Cell Lung Cancer,EL:3A:Neratinib(23220880) ; Breast Cancer,EL:3A:Neratinib(23220880)
chr17	37881428	37881428	G	C	exonic	ERBB2	nonsynonymous SNV	p.E874Q	c.2620G>C		0	1	0	N
chr17	37881622	37881622	C	T	exonic	ERBB2	nonsynonymous SNV	p.R868W	c.2602C>T		0	1	0	D		Non-Small Cell Lung Cancer,EL:3A:Neratinib(23220880) ; Breast Cancer,EL:3A:Neratinib(23220880)
chr17	37883206	37883206	C	T	exonic	ERBB2	nonsynonymous SNV	p.P761S	c.2281C>T		0	1	0	N
chr17	37883659	37883659	G	A	exonic	ERBB2	nonsynonymous SNV	p.G815R	c.2443G>A		0	1	0	D		Non-Small Cell Lung Cancer,EL:3A:Neratinib(23220880) ; Breast Cancer,EL:3A:Neratinib(23220880)
chr17	41222975	41222975	C	G	exonic	BRCA1	nonsynonymous SNV	p.M1652I	c.4956G>C		1	0	0	N
chr17	41244252	41244252	G	A	exonic	BRCA1	nonsynonymous SNV	p.P1099L	c.3296C>T	rs80357201	1	0	0	D		Ovarian Cancer,EL:1:Rucaparib, Niraparib(27908594, 27717299, 28229583) ; Ovarian Cancer,EL:2A:Olaparib(19553641, 20406929, 21862407, 25366685, 20609468)
chr17	41244964	41244964	T	C	exonic	BRCA1	nonsynonymous SNV	p.K862E	c.2584A>G	rs80356927	1	0	0	D		Ovarian Cancer,EL:1:Rucaparib, Niraparib(27908594, 27717299, 28229583) ; Ovarian Cancer,EL:2A:Olaparib(19553641, 20406929, 21862407, 25366685, 20609468)
chr17	41246061	41246061	C	T	exonic	BRCA1	nonsynonymous SNV	p.R496H	c.1487G>A	rs28897677	1	0	0	N	ID=COSM5743853,COSM5743852;OCCURENCE=1(large_intestine),1(small_intestine)
chr17	41256920	41256920	A	G	exonic	BRCA1	nonsynonymous SNV	p.I89T	c.266T>C	rs80357097	1	0	0	D		Ovarian Cancer,EL:1:Rucaparib, Niraparib(27908594, 27717299, 28229583) ; Ovarian Cancer,EL:2A:Olaparib(19553641, 20406929, 21862407, 25366685, 20609468)
chr18	48575180	48575180	G	T	exonic	SMAD4	nonsynonymous SNV	p.S125I	c.374G>T		1	0	0	D
chr18	48575200	48575200	C	T	exonic	SMAD4	nonsynonymous SNV	p.H132Y	c.394C>T	rs1060500743	1	0	0	D	ID=COSM2879546,COSM3821565;OCCURENCE=1(breast),1(pancreas),1(upper_aerodigestive_tract)
chr18	48575219	48575219	C	T	exonic	SMAD4	nonsynonymous SNV	p.S138L	c.413C>T		1	0	0	D	ID=COSM6438206;OCCURENCE=1(large_intestine)
chr18	48575222	48575222	C	T	exonic	SMAD4	nonsynonymous SNV	p.P139L	c.416C>T		1	0	0	D
chr18	48581196	48581196	A	G	exonic	SMAD4	nonsynonymous SNV	p.E167G	c.500A>G		1	0	0	N
chr18	48581198	48581198	G	T	exonic	SMAD4	stopgain	p.G168	c.502_504		1	0	0		ID=COSM14118;OCCURENCE=2(large_intestine)
chr18	48581208	48581208	C	T	exonic	SMAD4	nonsynonymous SNV	p.S171L	c.512C>T		1	0	0	D	ID=COSM5610594;OCCURENCE=1(skin)
chr18	48581214	48581214	C	A	exonic	SMAD4	nonsynonymous SNV	p.S173Y	c.518C>A		1	0	0	D
chr18	48581217	48581217	C	T	exonic	SMAD4	nonsynonymous SNV	p.T174I	c.521C>T		1	0	0	N
chr18	48581217	48581217	C	G	exonic	SMAD4	nonsynonymous SNV	p.T174S	c.521C>G		1	0	0	N
chr18	48581234	48581234	C	T	exonic	SMAD4	stopgain	p.Q180	c.538_540	rs377767332	1	0	0
chr18	48581238	48581238	C	G	exonic	SMAD4	nonsynonymous SNV	p.T181S	c.542C>G		1	0	0	D
chr18	48581249	48581249	C	T	exonic	SMAD4	nonsynonymous SNV	p.P185S	c.553C>T		1	0	0	D
chr18	48581261	48581261	C	T	exonic	SMAD4	nonsynonymous SNV	p.R189C	c.565C>T	rs140743238	1	0	0	N	ID=COSM4580445;OCCURENCE=1(bone),1(large_intestine)
chr18	48581264	48581264	G	T	exonic	SMAD4	nonsynonymous SNV	p.A190S	c.568G>T		1	0	0	N
chr18	48581267	48581267	T	C	exonic	SMAD4	nonsynonymous SNV	p.S191P	c.571T>C		1	0	0	N
chr18	48581282	48581282	A	G	exonic	SMAD4	nonsynonymous SNV	p.S196G	c.586A>G	rs946539148	1	0	0	N
chr18	48581286	48581286	C	T	exonic	SMAD4	nonsynonymous SNV	p.T197I	c.590C>T		1	0	0	D	ID=COSM1152191;OCCURENCE=1(large_intestine)
chr18	48581301	48581301	C	T	exonic	SMAD4	nonsynonymous SNV	p.A202V	c.605C>T		1	0	0	N	ID=COSM6438236;OCCURENCE=2(large_intestine)
chr18	48581319	48581319	C	T	exonic	SMAD4	nonsynonymous SNV	p.A208V	c.623C>T		1	0	0	N	ID=COSM6438227;OCCURENCE=1(large_intestine)
chr18	48584560	48584560	C	T	exonic	SMAD4	stopgain	p.Q245	c.733_735		1	0	0		ID=COSM14057;OCCURENCE=1(breast),3(pancreas),4(upper_aerodigestive_tract),1(large_intestine)
chr18	48584569	48584569	C	T	exonic	SMAD4	stopgain	p.Q248	c.742_744		1	0	0		ID=COSM218558;OCCURENCE=2(pancreas)
chr18	48584581	48584581	G	T	exonic	SMAD4	stopgain	p.G252	c.754_756		1	0	0		ID=COSM6191376;OCCURENCE=2(large_intestine)
chr18	48584599	48584599	G	T	exonic	SMAD4	nonsynonymous SNV	p.A258S	c.772G>T		1	0	0	N
chr18	48584600	48584600	C	T	exonic	SMAD4	nonsynonymous SNV	p.A258V	c.773C>T		1	0	0	N
chr18	48584606	48584606	A	-	exonic	SMAD4	frameshift deletion	p.Y260Sfs*76	c.779delA		1	0	0
chr18	48584611	48584611	C	T	exonic	SMAD4	nonsynonymous SNV	p.H262Y	c.784C>T		1	0	0	N
chr18	48584612	48584612	A	T	exonic	SMAD4	nonsynonymous SNV	p.H262L	c.785A>T		1	0	0	N
chr18	48586262	48586262	C	-	exonic	SMAD4	frameshift deletion	p.Q311Sfs*25	c.931delC		1	0	0
chr18	48586265	48586265	C	T	exonic	SMAD4	nonsynonymous SNV	p.P312S	c.934C>T		1	0	0	D
chr18	48586268	48586272	CCCAT	-	exonic	SMAD4	frameshift deletion	p.P313	c.937_939		1	0	0
chr18	48586268	48586269	CC	-	exonic	SMAD4	frameshift deletion	p.P313	c.937_939		1	0	0
chr18	48586269	48586269	C	T	exonic	SMAD4	nonsynonymous SNV	p.P313L	c.938C>T		1	0	0	D
chr18	48586283	48586283	C	T	exonic	SMAD4	nonsynonymous SNV	p.P318S	c.952C>T		1	0	0	D	ID=COSM6006465;OCCURENCE=1(NS)
chr18	48591834	48591834	G	C	exonic	SMAD4	nonsynonymous SNV	p.V333L	c.997G>C		1	0	0	D
chr18	48591839	48591839	G	T	exonic	SMAD4	nonsynonymous SNV	p.Q334H	c.1002G>T	rs773598775	1	0	0	D
chr18	48591850	48591850	C	T	exonic	SMAD4	nonsynonymous SNV	p.T338I	c.1013C>T		1	0	0	D
chr18	48591864	48591864	T	-	exonic	SMAD4	frameshift deletion	p.S343Qfs*41	c.1027delT		1	0	0
chr18	48591865	48591865	C	T	exonic	SMAD4	nonsynonymous SNV	p.S343L	c.1028C>T		1	0	0	D	ID=COSM6438238;OCCURENCE=1(large_intestine)
chr18	48591869	48591869	C	G	exonic	SMAD4	nonsynonymous SNV	p.S344R	c.1032C>G		1	0	0	D
chr18	48591883	48591883	C	G	exonic	SMAD4	nonsynonymous SNV	p.T349S	c.1046C>G		1	0	0	D
chr18	48591888	48591888	G	T	exonic	SMAD4	nonsynonymous SNV	p.D351Y	c.1051G>T		1	0	D351Y	D	ID=COSM1151549;OCCURENCE=1(stomach),1(prostate),2(large_intestine)
chr18	48591891	48591891	G	A	exonic	SMAD4	nonsynonymous SNV	p.G352R	c.1054G>A	rs121912581	1	0	G352R	D	ID=COSM1150607;OCCURENCE=1(breast),1(NS),6(large_intestine)
chr18	48591903	48591903	C	T	exonic	SMAD4	nonsynonymous SNV	p.P356S	c.1066C>T		1	0	P356S	D	ID=COSM1226726;OCCURENCE=2(liver),3(large_intestine),1(biliary_tract)
chr18	48591915	48591915	G	T	exonic	SMAD4	nonsynonymous SNV	p.D360Y	c.1078G>T		1	0	0	D	ID=COSM6475990;OCCURENCE=1(large_intestine)
chr18	48591918	48591918	C	T	exonic	SMAD4	nonsynonymous SNV	p.R361C	c.1081C>T	rs80338963	1	0	R361C	D	ID=COSM14140;OCCURENCE=1(NS),3(stomach),9(pancreas),4(oesophagus),1(cervix),1(thymus),46(large_intestine),4(biliary_tract),6(small_intestine)
chr18	48591919	48591919	G	A	exonic	SMAD4	nonsynonymous SNV	p.R361H	c.1082G>A	rs377767347	1	0	R361H	D	ID=COSM14122;OCCURENCE=1(breast),2(stomach),1(urinary_tract),9(pancreas),1(peritoneum),4(oesophagus),2(lung),1(cervix),1(upper_aerodigestive_tract),53(large_intestine),1(biliary_tract),2(small_intestine)
chr18	48591930	48591930	G	T	exonic	SMAD4	nonsynonymous SNV	p.G365C	c.1093G>T		1	0	0	D
chr18	48591940	48591940	C	T	exonic	SMAD4	nonsynonymous SNV	p.S368F	c.1103C>T		1	0	0	D
chr18	48591943	48591943	C	-	exonic	SMAD4	frameshift deletion	p.N369Mfs*15	c.1106delA		1	0	0
chr18	48591955	48591955	C	T	exonic	SMAD4	nonsynonymous SNV	p.T373I	c.1118C>T		1	0	0	D
chr18	48593403	48593403	A	G	exonic	SMAD4	nonsynonymous SNV	p.K385R	c.1154A>G	rs923348055	1	0	0	D
chr18	48593427	48593427	G	T	exonic	SMAD4	nonsynonymous SNV	p.G393V	c.1178G>T		1	0	0	D	ID=COSM6260919;OCCURENCE=1(liver)
chr18	48593444	48593444	G	-	exonic	SMAD4	frameshift deletion	p.V399Sfs*16	c.1195delG		1	0	0
chr18	48593478	48593478	A	T	exonic	SMAD4	nonsynonymous SNV	p.Q410L	c.1229A>T		1	0	0	D
chr18	48593478	48593478	A	G	exonic	SMAD4	nonsynonymous SNV	p.Q410R	c.1229A>G		1	0	0	D
chr18	48593501	48593501	G	A	exonic	SMAD4	nonsynonymous SNV	p.A418T	c.1252G>A		1	0	0	D
chr18	48593513	48593513	C	T	exonic	SMAD4	nonsynonymous SNV	p.P422S	c.1264C>T		1	0	0	D
chr18	48603029	48603029	C	T	exonic	SMAD4	nonsynonymous SNV	p.H444Y	c.1330C>T		1	0	0	D	ID=COSM5692631;OCCURENCE=1(lung)
chr18	48603030	48603030	A	T	exonic	SMAD4	nonsynonymous SNV	p.H444L	c.1331A>T		1	0	0	D
chr18	48603032	48603032	C	T	exonic	SMAD4	stopgain	p.R445	c.1333_1335	rs377767360	1	0	0		ID=COSM14096;OCCURENCE=17(pancreas),1(oesophagus),1(cervix),8(large_intestine),1(small_intestine)
chr18	48603042	48603042	A	G	exonic	SMAD4	nonsynonymous SNV	p.Q448R	c.1343A>G		1	0	0	D
chr18	48603047	48603047	C	T	exonic	SMAD4	stopgain	p.Q450	c.1348_1350		1	0	0		ID=COSM6475947;OCCURENCE=1(large_intestine)
chr18	48603066	48603066	C	T	exonic	SMAD4	nonsynonymous SNV	p.A456V	c.1367C>T		1	0	0	D
chr18	48603072	48603072	C	T	exonic	SMAD4	nonsynonymous SNV	p.A458V	c.1373C>T		1	0	0	D
chr18	48603102	48603102	A	T	exonic	SMAD4	nonsynonymous SNV	p.N468I	c.1403A>T		1	0	0	D
chr18	48603113	48603113	C	T	exonic	SMAD4	nonsynonymous SNV	p.P472S	c.1414C>T		1	0	0	D
chr18	48603117	48603117	G	A	exonic	SMAD4	nonsynonymous SNV	p.G473E	c.1418G>A		1	0	0	D
chr18	48603125	48603125	G	T	exonic	SMAD4	nonsynonymous SNV	p.G476C	c.1426G>T		1	0	0	D
chr18	48603128	48603128	G	T	exonic	SMAD4	stopgain	p.G477	c.1429_1431		1	0	0
chr18	48604664	48604664	C	T	exonic	SMAD4	nonsynonymous SNV	p.R496C	c.1486C>T	rs397518413	1	0	0	D	ID=COSM6476007;OCCURENCE=5(large_intestine)
chr18	48604667	48604667	C	T	exonic	SMAD4	nonsynonymous SNV	p.R497C	c.1489C>T	rs762118751	1	0	0	D
chr18	48604679	48604679	C	T	exonic	SMAD4	nonsynonymous SNV	p.L501F	c.1501C>T		1	0	0	D	ID=COSM6438225;OCCURENCE=2(large_intestine)
chr18	48604707	48604707	G	T	exonic	SMAD4	nonsynonymous SNV	p.G510V	c.1529G>T	rs377767371	1	0	0	D	ID=COSM1151558;OCCURENCE=4(large_intestine)
chr18	48604709	48604709	C	T	exonic	SMAD4	nonsynonymous SNV	p.P511S	c.1531C>T		1	0	0	D
chr18	48604719	48604719	C	T	exonic	SMAD4	nonsynonymous SNV	p.P514L	c.1541C>T		1	0	0	D	ID=COSM6438241;OCCURENCE=1(large_intestine)
chr18	48604736	48604736	G	A	exonic	SMAD4	nonsynonymous SNV	p.E520K	c.1558G>A		1	0	0	D
chr18	48604761	48604761	A	T	exonic	SMAD4	nonsynonymous SNV	p.H528L	c.1583A>T		1	0	0	D
chr18	48604766	48604766	C	T	exonic	SMAD4	nonsynonymous SNV	p.H530Y	c.1588C>T		1	0	0	D
chr19	1207039	1207039	G	T	exonic	STK11	nonsynonymous SNV	p.A43S	c.127G>T		1	0	0	D
chr19	1207042	1207042	A	G	exonic	STK11	nonsynonymous SNV	p.K44E	c.130A>G		1	0	0	D
chr19	1207056	1207056	G	C	exonic	STK11	nonsynonymous SNV	p.K48N	c.144G>C		1	0	0	D
chr19	1207066	1207066	G	A	exonic	STK11	nonsynonymous SNV	p.G52R	c.154G>A		1	0	0	D	ID=COSM5991522;OCCURENCE=1(skin)
chr19	1207082	1207082	A	G	exonic	STK11	nonsynonymous SNV	p.E57G	c.170A>G		1	0	0	D
chr19	1207088	1207088	C	T	exonic	STK11	nonsynonymous SNV	p.S59F	c.176C>T		1	0	0	D
chr19	1207100	1207100	T	C	exonic	STK11	nonsynonymous SNV	p.V63A	c.188T>C		1	0	0	D
chr19	1207133	1207133	G	T	exonic	STK11	nonsynonymous SNV	p.R74M	c.221G>T		1	0	0	N
chr19	1207139	1207139	C	T	exonic	STK11	nonsynonymous SNV	p.A76V	c.227C>T	rs773422811	1	0	0	D
chr19	1220503	1220503	A	T	exonic	STK11	nonsynonymous SNV	p.E199V	c.596A>T		1	0	0	N	ID=COSM6304763,COSM6304764;OCCURENCE=1(liver)
chr19	1220587	1220587	A	T	exonic	STK11	nonsynonymous SNV	p.H202L	c.605A>T		1	0	0	N
chr19	1220590	1220590	C	T	exonic	STK11	nonsynonymous SNV	p.P203L	c.608C>T	rs587782379	1	0	0	D	ID=COSM3692365,COSM3692364;OCCURENCE=2(large_intestine)
chr19	1220596	1220596	C	T	exonic	STK11	nonsynonymous SNV	p.A205V	c.614C>T	rs587782468	1	0	0	N
chr19	1220605	1220605	A	T	exonic	STK11	nonsynonymous SNV	p.D208V	c.623A>T		1	0	0	N
chr19	1220613	1220613	C	T	exonic	STK11	nonsynonymous SNV	p.R211W	c.631C>T	rs185087320	1	0	0	N
chr19	1220616	1220616	G	-	exonic	STK11	frameshift deletion	p.T212	c.634_636		1	0	0
chr19	1221273	1221273	A	G	exonic	STK11	nonsynonymous SNV	p.N266D	c.796A>G		1	0	0	N
chr19	1221279	1221279	G	A	exonic	STK11	nonsynonymous SNV	p.G268R	c.802G>A		1	0	0	N	ID=COSM4559383,COSM4559384;OCCURENCE=1(skin)
chr19	1221285	1221285	G	A	exonic	STK11	nonsynonymous SNV	p.G270R	c.808G>A		1	0	0	N
chr19	1221286	1221286	G	A	exonic	STK11	nonsynonymous SNV	p.G270E	c.809G>A		1	0	0	N
chr19	1221289	1221289	G	A	exonic	STK11	nonsynonymous SNV	p.S271N	c.812G>A		1	0	0	N	ID=COSM6444452;OCCURENCE=2(large_intestine)
chr19	1221298	1221298	T	C	exonic	STK11	nonsynonymous SNV	p.I274T	c.821T>C		1	0	0	D
chr19	1221303	1221303	G	A	exonic	STK11	nonsynonymous SNV	p.G276S	c.826G>A		1	0	0	N
chr19	1221306	1221306	G	A	exonic	STK11	nonsynonymous SNV	p.D277N	c.829G>A		1	0	0	N
chr19	1221329	1221329	C	G	exonic	STK11	nonsynonymous SNV	p.D284E	c.852C>G		1	0	0	D
chr19	1223060	1223060	C	T	exonic	STK11	nonsynonymous SNV	p.R333C	c.997C>T	rs746564972	1	0	0	D
chr19	1223078	1223078	C	T	exonic	STK11	nonsynonymous SNV	p.P339S	c.1015C>T		1	0	0	D
chr19	1223079	1223079	C	T	exonic	STK11	nonsynonymous SNV	p.P339L	c.1016C>T	rs567896256	1	0	0	D
chr19	1223096	1223096	C	T	exonic	STK11	nonsynonymous SNV	p.H345Y	c.1033C>T		1	0	0	D	ID=COSM6444458;OCCURENCE=1(large_intestine)
chr19	1223097	1223097	A	T	exonic	STK11	nonsynonymous SNV	p.H345L	c.1034A>T		1	0	0	D
chr19	1223117	1223117	G	A	exonic	STK11	nonsynonymous SNV	p.D352N	c.1054G>A		1	0	0	N
chr19	1223120	1223120	C	T	exonic	STK11	nonsynonymous SNV	p.L353F	c.1057C>T		1	0	0	D
chr19	1223123	1223123	T	C	exonic	STK11	nonsynonymous SNV	p.F354L	c.1060T>C	rs1057520018	1	0	0	N
chr19	1223124	1223126	TCG	-	exonic	STK11	nonframeshift deletion	p.F354_D355delinsY	c.1061_1063delTCG		1	0	0
chr19	1223151	1223151	C	T	exonic	STK11	nonsynonymous SNV	p.T363I	c.1088C>T	rs587778695	1	0	0	D
chr19	1223153	1223153	C	T	exonic	STK11	stopgain	p.Q364	c.1090_1092		1	0	0		ID=COSM4620070,COSM4620071;OCCURENCE=1(large_intestine)
chr19	1223163	1223163	C	T	exonic	STK11	nonsynonymous SNV	p.T367M	c.1100C>T	rs587782835	1	0	0	D	ID=COSM21358;OCCURENCE=1(large_intestine)
chr19	3114952	3114952	G	A	exonic	GNA11	nonsynonymous SNV	p.D163N	c.487G>A		0	1	0	D
chr19	3114955	3114955	G	A	exonic	GNA11	nonsynonymous SNV	p.V164I	c.490G>A	rs775624350	0	1	0	N	ID=COSM1392332;OCCURENCE=2(large_intestine)
chr19	3114960	3114960	C	G	exonic	GNA11	nonsynonymous SNV	p.D165E	c.495C>G		0	1	0	N
chr19	3114989	3114989	C	T	exonic	GNA11	nonsynonymous SNV	p.T175I	c.524C>T		0	1	0	D
chr19	3114991	3114991	C	T	exonic	GNA11	stopgain	p.Q176	c.526_528		0	1	0
chr19	3115019	3115019	C	T	exonic	GNA11	nonsynonymous SNV	p.P185L	c.554C>T		0	1	0	D
chr19	3115033	3115033	A	T	exonic	GNA11	nonsynonymous SNV	p.I190F	c.568A>T		0	1	0	D
chr19	3115043	3115043	C	A	exonic	GNA11	nonsynonymous SNV	p.P193H	c.578C>A		0	1	0	D
chr19	3115054	3115054	G	-	exonic	GNA11	frameshift deletion	p.E197Rfs*27	c.589delG		0	1	0
chr19	3115063	3115063	A	G	exonic	GNA11	nonsynonymous SNV	p.I200V	c.598A>G		0	1	0	N
chr19	3118922	3118922	G	-	exonic	GNA11	frameshift deletion	p.M203Wfs*21	c.606delG		0	1	0
chr19	3118925	3118925	G	C	exonic	GNA11	nonsynonymous SNV	p.M203I	c.609G>C		0	1	0	D
chr19	3118926	3118926	G	A	exonic	GNA11	nonsynonymous SNV	p.V204M	c.610G>A		0	1	0	D
chr19	3118931	3118931	T	-	exonic	GNA11	frameshift deletion	p.D205Efs*19	c.615delT		0	1	0
chr19	3118932	3118932	G	A	exonic	GNA11	nonsynonymous SNV	p.V206M	c.616G>A		0	1	0	D
chr19	3118933	3118933	T	G	exonic	GNA11	nonsynonymous SNV	p.V206G	c.617T>G		0	1	0	D
chr19	3118962	3118962	G	A	exonic	GNA11	nonsynonymous SNV	p.W216	c.646_648		0	1	0
chr19	3119243	3119243	C	-	exonic	GNA11	frameshift deletion	p.I259Sfs*52	c.775delA		0	1	0
chr19	3119255	3119255	G	A	exonic	GNA11	nonsynonymous SNV	p.W263	c.787_789		0	1	0
chr19	3119273	3119273	G	A	exonic	GNA11	nonsynonymous SNV	p.V269I	c.805G>A	rs144829732	0	1	0	N	ID=COSM4076641;OCCURENCE=1(stomach)
chr19	3119290	3119290	C	G	exonic	GNA11	nonsynonymous SNV	p.N274K	c.822C>G		0	1	0	D
chr19	3119297	3119297	G	A	exonic	GNA11	nonsynonymous SNV	p.D277N	c.829G>A		0	1	0	D
chr19	3119300	3119300	C	G	exonic	GNA11	nonsynonymous SNV	p.L278V	c.832C>G		0	1	0	D
chr19	3119301	3119301	T	A	exonic	GNA11	nonsynonymous SNV	p.L278Q	c.833T>A		0	1	0	D
chr19	3119306	3119306	G	A	exonic	GNA11	nonsynonymous SNV	p.E280K	c.838G>A		0	1	0	N
chr19	3119308	3119308	G	C	exonic	GNA11	nonsynonymous SNV	p.E280D	c.840G>C		0	1	0	D
chr19	3119330	3119330	C	A	exonic	GNA11	nonsynonymous SNV	p.L288M	c.862C>A		0	1	0	D
chr19	3119342	3119342	T	A	exonic	GNA11	nonsynonymous SNV	p.F292I	c.874T>A		0	1	0	D
chr19	3119354	3119354	G	A	exonic	GNA11	nonsynonymous SNV	p.D296N	c.886G>A		0	1	0	D
chr19	3120993	3120993	A	T	exonic	GNA11	nonsynonymous SNV	p.Q299L	c.896A>T		0	1	0	N
chr19	3121002	3121002	C	T	exonic	GNA11	nonsynonymous SNV	p.A302V	c.905C>T		0	1	0	N
chr19	3121010	3121012	GCG	-	exonic	GNA11	nonframeshift deletion	p.A305delA	c.913_915delGCG		0	1	0
chr19	3121014	3121014	G	A	exonic	GNA11	nonsynonymous SNV	p.R306Q	c.917G>A		0	1	0	N	ID=COSM6342221;OCCURENCE=1(large_intestine)
chr19	3121016	3121016	G	-	exonic	GNA11	frameshift deletion	p.E307	c.919_921		0	1	0
chr19	3121033	3121033	G	C	exonic	GNA11	nonsynonymous SNV	p.M312I	c.936G>C		0	1	0	D
chr19	3121052	3121052	G	A	exonic	GNA11	nonsynonymous SNV	p.D319N	c.955G>A	rs777133920	0	1	0	D	ID=COSM2750406;OCCURENCE=1(large_intestine)
chr19	3121070	3121070	C	A	exonic	GNA11	nonsynonymous SNV	p.Y325	c.973_975		0	1	0
chr19	3121077	3121077	A	G	exonic	GNA11	nonsynonymous SNV	p.H327R	c.980A>G		0	1	0	D	ID=COSM3532100;OCCURENCE=1(skin)
chr19	3121080	3121080	T	C	exonic	GNA11	nonsynonymous SNV	p.F328S	c.983T>C		0	1	0	D
chr19	3121085	3121085	T	A	exonic	GNA11	nonsynonymous SNV	p.C330	c.988_990		0	1	0	D
chr19	3121106	3121106	A	T	exonic	GNA11	nonsynonymous SNV	p.I337F	c.1009A>T		0	1	0	D
chr19	3121113	3121113	T	C	exonic	GNA11	nonsynonymous SNV	p.F339S	c.1016T>C		0	1	0	D
chr19	3121134	3121134	A	G	exonic	GNA11	nonsynonymous SNV	p.D346G	c.1037A>G		0	1	0	D
chr19	3121152	3121152	A	T	exonic	GNA11	nonsynonymous SNV	p.N352I	c.1055A>T		0	1	0	D
chr19	3121167	3121167	A	T	exonic	GNA11	nonsynonymous SNV	p.N357I	c.1070A>T		0	1	0	D
chr19	3121169	3121169	C	A	exonic	GNA11	nonsynonymous SNV	p.L358M	c.1072C>A		0	1	0	D
chr19	3121172	3121172	G	T	exonic	GNA11	nonsynonymous SNV	p.V359F	c.1075G>T		0	1	0	D
chr19	3121172	3121172	G	-	exonic	GNA11	frameshift deletion	p.V359	c.1075_1077		0	1	0
chr19	17945696	17945696	C	A	exonic	JAK3	nonsynonymous SNV	p.V722F	c.2164G>T		0	0	0	N
chr19	17945699	17945699	C	T	exonic	JAK3	nonsynonymous SNV	p.G721S	c.2161G>A		0	0	0	D
chr19	17945700	17945700	A	C	exonic	JAK3	nonsynonymous SNV	p.S720R	c.2160T>G		0	0	0	D
chr19	17945708	17945708	C	G	exonic	JAK3	nonsynonymous SNV	p.V718L	c.2152G>C	rs146837396	0	0	0	N	ID=COSM5946070;OCCURENCE=1(NS)
chr19	17945712	17945712	G	A	exonic	JAK3	nonsynonymous SNV	p.W716	c.2146_2148		0	0	0
chr19	17945741	17945741	C	T	exonic	JAK3	nonsynonymous SNV	p.D707N	c.2119G>A		0	0	0	D
chr19	17945744	17945744	C	T	exonic	JAK3	nonsynonymous SNV	p.A706T	c.2116G>A		0	0	0	N	ID=COSM6437949;OCCURENCE=1(large_intestine)
chr19	17945764	17945764	G	T	exonic	JAK3	nonsynonymous SNV	p.A699E	c.2096C>A		0	0	0	D
chr19	17945770	17945770	C	T	exonic	JAK3	nonsynonymous SNV	p.R697Q	c.2090G>A	rs200849846	0	0	0	N	ID=COSM1391559,COSM1391558;OCCURENCE=2(large_intestine),1(small_intestine)
chr19	17945778	17945778	C	G	exonic	JAK3	nonsynonymous SNV	p.E694D	c.2082G>C		0	0	0	D
chr19	17945785	17945785	G	T	exonic	JAK3	nonsynonymous SNV	p.A692D	c.2075C>A		0	0	0	D
chr19	17945790	17945790	G	A	exonic	JAK3	nonsynonymous SNV	p.W690	c.2068_2070		0	0	0
chr2	29432664	29432664	C	T	exonic	ALK	nonsynonymous SNV	p.R1275Q	c.3824G>A	rs113994087	0	1	R1275Q	D	ID=COSM28056;OCCURENCE=1(breast),94(autonomic_ganglia),1(thymus)
chr2	29432700	29432700	C	T	exonic	ALK	nonsynonymous SNV	p.G1263E	c.3788G>A		0	1	0	D	ID=COSM3933628;OCCURENCE=1(urinary_tract)
chr2	29432725	29432725	A	G	exonic	ALK	nonsynonymous SNV	p.C1255R	c.3763T>C		0	1	0	D
chr2	29432730	29432730	C	T	exonic	ALK	nonsynonymous SNV	p.R1253K	c.3758G>A		0	1	0	D
chr2	29432743	29432743	C	T	exonic	ALK	nonsynonymous SNV	p.D1249N	c.3745G>A		0	1	0	D	ID=COSM6196759;OCCURENCE=1(large_intestine)
chr2	209113112	209113112	C	T	exonic	IDH1	nonsynonymous SNV	p.R132H	c.395G>A	rs121913500	0	1	R132H	D	ID=COSM28746;OCCURENCE=1(salivary_gland),40(bone),1(stomach),361(haematopoietic_and_lymphoid_tissue),1(urinary_tract),1(pancreas),1(skin),6(prostate),1(lung),4093(central_nervous_system)
chr2	209113113	209113113	G	A	exonic	IDH1	nonsynonymous SNV	p.R132C	c.394C>T	rs121913499	0	1	R132C	D	ID=COSM28747;OCCURENCE=2(breast),191(bone),19(NS),1(stomach),344(haematopoietic_and_lymphoid_tissue),11(soft_tissue),11(liver),1(autonomic_ganglia),24(skin),3(prostate),11(large_intestine),126(central_nervous_system),5(small_intestine),48(biliary_tract)
chr2	209113120	209113120	G	C	exonic	IDH1	nonsynonymous SNV	p.I129M	c.387C>G		0	1	0	D		Acute Myeloid Leukemia, EL:1:Ivosidenib(23393090, 23558169, 29860938)
chr2	209113134	209113134	C	T	exonic	IDH1	nonsynonymous SNV	p.V125I	c.373G>A		0	1	0	N
chr2	209113142	209113142	C	T	exonic	IDH1	nonsynonymous SNV	p.S122N	c.365G>A	rs756511163	0	1	0	N
chr2	209113151	209113151	C	T	exonic	IDH1	nonsynonymous SNV	p.R119Q	c.356G>A	rs780642190	0	1	0	D	ID=COSM242544;OCCURENCE=1(prostate),2(large_intestine)
chr2	209113159	209113159	A	C	exonic	IDH1	nonsynonymous SNV	p.N116K	c.348T>G		0	1	0	D
chr2	209113211	209113211	A	T	exonic	IDH1	nonsynonymous SNV	p.I99K	c.296T>A		0	1	0	D
chr2	212288966	212288966	C	T	exonic	ERBB4	nonsynonymous SNV	p.R927Q	c.2780G>A	rs397514262	0	1	0	N	ID=COSM4090866,COSM4090867;OCCURENCE=1(stomach)
chr2	212288983	212288983	T	-	exonic	ERBB4	stopgain	p.Y921	c.2761_2763		0	1	0
chr2	212288984	212288984	T	A	exonic	ERBB4	nonsynonymous SNV	p.Y921F	c.2762A>T		0	1	0	N
chr2	212288988	212288988	G	C	exonic	ERBB4	nonsynonymous SNV	p.P920A	c.2758C>G		0	1	0	D
chr2	212288996	212288996	C	T	exonic	ERBB4	nonsynonymous SNV	p.G917E	c.2750G>A		0	1	0	D	ID=COSM5911637,COSM5911638;OCCURENCE=1(skin)
chr2	212288997	212288997	C	T	exonic	ERBB4	nonsynonymous SNV	p.G917R	c.2749G>A		0	1	0	D	ID=COSM94230;OCCURENCE=1(lung)
chr2	212289012	212289012	C	T	exonic	ERBB4	nonsynonymous SNV	p.E912K	c.2734G>A		0	1	0	D	ID=COSM6197849;OCCURENCE=1(large_intestine)
chr2	212289023	212289023	A	T	exonic	ERBB4	nonsynonymous SNV	p.V908D	c.2723T>A		0	1	0	D
chr2	212289026	212289026	C	T	exonic	ERBB4	nonsynonymous SNV	p.G907E	c.2720G>A		0	1	0	D	ID=COSM3577146,COSM3577147;OCCURENCE=2(skin)
chr2	212530082	212530082	C	T	exonic	ERBB4	nonsynonymous SNV	p.E613K	c.1837G>A		0	1	0	D
chr2	212530084	212530084	C	T	exonic	ERBB4	nonsynonymous SNV	p.R612Q	c.1835G>A	rs139122290	0	1	0	N	ID=COSM232263;OCCURENCE=2(skin)
chr2	212530097	212530097	C	T	exonic	ERBB4	nonsynonymous SNV	p.A608T	c.1822G>A		0	1	0	D	ID=COSM5991532;OCCURENCE=1(skin)
chr2	212530106	212530106	A	G	exonic	ERBB4	nonsynonymous SNV	p.F605L	c.1813T>C		0	1	0	N
chr2	212530119	212530119	A	-	exonic	ERBB4	frameshift deletion	p.N601Tfs*52	c.1802delA		0	1	0
chr2	212530120	212530120	G	C	exonic	ERBB4	nonsynonymous SNV	p.A600G	c.1799C>G		0	1	0	D
chr2	212530123	212530123	C	T	exonic	ERBB4	nonsynonymous SNV	p.G599E	c.1796G>A		0	1	0	N	ID=COSM6005749;OCCURENCE=1(NS)
chr2	212530125	212530125	C	A	exonic	ERBB4	nonsynonymous SNV	p.Q598H	c.1794G>T		0	1	0	D
chr2	212530133	212530133	C	T	exonic	ERBB4	nonsynonymous SNV	p.G596S	c.1786G>A		0	1	0	D
chr2	212530134	212530134	A	C	exonic	ERBB4	nonsynonymous SNV	p.D595E	c.1785T>G		0	1	0	D
chr2	212530146	212530146	G	-	exonic	ERBB4	frameshift deletion	p.E591	c.1771_1773		0	1	0
chr2	212530151	212530151	C	T	exonic	ERBB4	nonsynonymous SNV	p.V590M	c.1768G>A		0	1	0	D
chr2	212530163	212530163	G	-	exonic	ERBB4	frameshift deletion	p.G586Afs*67	c.1757delG		0	1	0
chr2	212530166	212530166	C	T	exonic	ERBB4	nonsynonymous SNV	p.D585N	c.1753G>A		0	1	0	N
chr2	212576851	212576851	A	G	exonic	ERBB4	nonsynonymous SNV	p.S350P	c.1048T>C		0	1	0	D
chr2	212576856	212576856	A	T	exonic	ERBB4	nonsynonymous SNV	p.V348E	c.1043T>A		0	1	0	D
chr2	212576871	212576871	A	G	exonic	ERBB4	nonsynonymous SNV	p.M343T	c.1028T>C	rs1001418624	0	1	0	N	ID=COSM6005754;OCCURENCE=1(NS)
chr2	212576876	212576876	C	A	exonic	ERBB4	synonymous SNV	p.S341	c.1021_1023		0	1	0
chr2	212576889	212576889	A	G	exonic	ERBB4	nonsynonymous SNV	p.I337T	c.1010T>C		0	1	0	N
chr2	212578349	212578349	G	T	exonic	ERBB4	nonsynonymous SNV	p.S303Y	c.908C>A		0	1	0	D	ID=COSM12833;OCCURENCE=1(lung),1(large_intestine)
chr2	212578350	212578350	A	T	exonic	ERBB4	nonsynonymous SNV	p.S303T	c.907T>A		0	1	0	N
chr2	212578365	212578365	C	T	exonic	ERBB4	nonsynonymous SNV	p.V298M	c.892G>A		0	1	0	D
chr2	212587145	212587145	C	T	exonic	ERBB4	nonsynonymous SNV	p.G286R	c.856G>A		0	1	0	D
chr2	212587181	212587181	G	T	exonic	ERBB4	nonsynonymous SNV	p.Q274K	c.820C>A		0	1	0	N
chr2	212587228	212587228	C	T	exonic	ERBB4	nonsynonymous SNV	p.C258Y	c.773G>A		0	1	0	D
chr2	212587235	212587235	G	-	exonic	ERBB4	frameshift deletion	p.G256Efs*44	c.767delG		0	1	0
chr2	212587239	212587239	G	C	exonic	ERBB4	nonsynonymous SNV	p.D254E	c.762C>G		0	1	0	D
chr2	212587247	212587247	A	G	exonic	ERBB4	nonsynonymous SNV	p.F252L	c.754T>C		0	1	0	N
chr2	212587248	212587248	A	C	exonic	ERBB4	nonsynonymous SNV	p.N251K	c.753T>G		0	1	0	D
chr2	212589815	212589815	C	T	exonic	ERBB4	nonsynonymous SNV	p.D243N	c.727G>A	rs866956005	0	1	0	N
chr2	212589823	212589823	C	T	exonic	ERBB4	nonsynonymous SNV	p.G240E	c.719G>A		0	1	0	D
chr2	212589832	212589832	C	A	exonic	ERBB4	nonsynonymous SNV	p.G237V	c.710G>T		0	1	0	D
chr2	212589839	212589839	C	T	exonic	ERBB4	nonsynonymous SNV	p.A235T	c.703G>A		0	1	0	D
chr2	212589852	212589852	C	A	exonic	ERBB4	synonymous SNV	p.C230	c.688_690		0	1	0
chr2	212589875	212589875	C	T	exonic	ERBB4	nonsynonymous SNV	p.G223R	c.667G>A	rs758827443	0	1	0	D
chr2	212589886	212589886	C	T	exonic	ERBB4	nonsynonymous SNV	p.G219D	c.656G>A		0	1	0	D
chr2	212589890	212589890	C	T	exonic	ERBB4	nonsynonymous SNV	p.D218N	c.652G>A		0	1	0	N	ID=COSM6197862;OCCURENCE=1(large_intestine)
chr2	212589898	212589898	T	A	exonic	ERBB4	nonsynonymous SNV	p.E215V	c.644A>T		0	1	0	D
chr2	212589908	212589908	C	T	exonic	ERBB4	nonsynonymous SNV	p.V212M	c.634G>A		0	1	0	N
chr2	212589913	212589913	C	T	exonic	ERBB4	nonsynonymous SNV	p.R210K	c.629G>A		0	1	0	N
chr2	212589914	212589914	T	A	exonic	ERBB4	nonsynonymous SNV	p.R210W	c.628A>T		0	1	0	D
chr2	212652763	212652763	A	C	exonic	ERBB4	nonsynonymous SNV	p.N181K	c.543T>G		0	1	0	D
chr2	212652779	212652779	G	T	exonic	ERBB4	nonsynonymous SNV	p.T176N	c.527C>A		0	1	0	D
chr2	212652793	212652793	G	A	exonic	ERBB4	nonsynonymous SNV	p.W171	c.511_513		0	1	0		ID=COSM5675696,COSM5675697;OCCURENCE=1(lung)
chr2	212652803	212652803	C	T	exonic	ERBB4	nonsynonymous SNV	p.R168Q	c.503G>A	rs200302763	0	1	0	D	ID=COSM6197853;OCCURENCE=2(large_intestine)
chr2	212652804	212652804	C	-	exonic	ERBB4	frameshift deletion	p.R168Gfs*8	c.502delC		0	1	0
chr2	212652813	212652813	C	T	exonic	ERBB4	nonsynonymous SNV	p.D165N	c.493G>A		0	1	0	D
chr2	212652815	212652815	T	A	exonic	ERBB4	nonsynonymous SNV	p.Q164L	c.491A>T		0	1	0	N
chr2	212652815	212652815	T	C	exonic	ERBB4	nonsynonymous SNV	p.Q164R	c.491A>G		0	1	0	N
chr2	212652817	212652817	G	A	exonic	ERBB4	nonsynonymous SNV	p.W163	c.487_489		0	1	0
chr2	212652819	212652819	A	T	exonic	ERBB4	nonsynonymous SNV	p.W163R	c.487T>A		0	1	0	D
chr2	212652831	212652831	C	T	exonic	ERBB4	nonsynonymous SNV	p.D159N	c.475G>A		0	1	0	N
chr2	212652833	212652833	G	T	exonic	ERBB4	nonsynonymous SNV	p.A158E	c.473C>A	rs370840578	0	1	0	D	ID=COSM5369854,COSM5369855;OCCURENCE=1(lung)
chr2	212652834	212652834	C	T	exonic	ERBB4	nonsynonymous SNV	p.A158T	c.472G>A	rs375361752	0	1	0	N
chr2	212812190	212812191	TT	-	exonic	ERBB4	frameshift deletion	p.F129Wfs*54	c.386_387delTT		0	1	0
chr2	212812196	212812197	GG	-	exonic	ERBB4	frameshift deletion	p.G127Kfs*56	c.379_380delGG		0	1	0
chr2	212812197	212812197	C	T	exonic	ERBB4	nonsynonymous SNV	p.G127R	c.379G>A		0	1	0	D
chr2	212812200	212812200	C	T	exonic	ERBB4	nonsynonymous SNV	p.D126N	c.376G>A	rs953144117	0	1	0	N
chr2	212812210	212812210	G	C	exonic	ERBB4	nonsynonymous SNV	p.N122K	c.366C>G		0	1	0	D
chr2	212812215	212812215	A	T	exonic	ERBB4	nonsynonymous SNV	p.L121I	c.361T>A		0	1	0	D
chr2	212812218	212812218	A	T	exonic	ERBB4	nonsynonymous SNV	p.F120I	c.358T>A		0	1	0	D
chr2	212812254	212812254	T	C	exonic	ERBB4	nonsynonymous SNV	p.T108A	c.322A>G		0	1	0	D
chr2	212812268	212812268	C	T	exonic	ERBB4	nonsynonymous SNV	p.R103H	c.308G>A	rs754487821	0	1	0	D	ID=COSM6197871;OCCURENCE=1(large_intestine)
chr20	36031765	36031765	C	T	exonic	SRC	nonsynonymous SNV	p.P532S	c.1594C>T		0	1	0	N
chr20	57484417	57484417	T	C	exonic	GNAS	nonsynonymous SNV	p.C200R	c.598T>C		0	1	0	D
chr20	57484421	57484421	G	A	exonic	GNAS	nonsynonymous SNV	p.R201H	c.602G>A	rs121913495	0	1	R201H	D	ID=COSM94388,COSM27895;OCCURENCE=5(ovary),122(bone),1(breast),6(NS),5(haematopoietic_and_lymphoid_tissue),8(stomach),2(kidney),15(soft_tissue),196(pancreas),7(liver),17(peritoneum),1(oesophagus),17(pituitary),9(adrenal_gland),1(skin),2(lung),14(thyroid),7(cervix),86(large_intestine),34(small_intestine),19(biliary_tract)
chr20	57484430	57484430	C	T	exonic	GNAS	nonsynonymous SNV	p.T847I	c.2540C>T		0	1	0	D
chr20	57484433	57484433	C	T	exonic	GNAS	nonsynonymous SNV	p.S848F	c.2543C>T		0	1	0	D
chr20	57484456	57484456	C	T	exonic	GNAS	stopgain	p.Q856	c.2566_2568		0	1	0
chr20	57484477	57484477	C	-	exonic	GNAS	frameshift deletion	p.H863Tfs*22	c.2587delC		0	1	0
chr22	24133967	24133967	C	T	exonic	SMARCB1	stopgain	p.R40	c.118_120	rs1060503015	1	0	0		ID=COSM1002,COSM5921881;OCCURENCE=6(soft_tissue),3(skin),1(large_intestine),9(central_nervous_system)
chr22	24133970	24133970	G	C	exonic	SMARCB1	nonsynonymous SNV	p.G41R	c.121G>C		1	0	0	D
chr22	24133994	24133994	T	C	exonic	SMARCB1	nonsynonymous SNV	p.S49P	c.145T>C		1	0	0	D
chr22	24133997	24133997	C	T	exonic	SMARCB1	nonsynonymous SNV	p.L50F	c.148C>T		1	0	0	D
chr22	24134025	24134025	A	T	exonic	SMARCB1	nonsynonymous SNV	p.E59V	c.176A>T		1	0	0	D
chr22	24134036	24134036	A	G	exonic	SMARCB1	nonsynonymous SNV	p.I63V	c.187A>G		1	0	0	N
chr22	24134046	24134046	C	T	exonic	SMARCB1	nonsynonymous SNV	p.S66L	c.197C>T		1	0	0	N	ID=COSM1415164,COSM1415163;OCCURENCE=2(large_intestine)
chr22	24134066	24134066	A	T	exonic	SMARCB1	stopgain	p.K73	c.217_219		1	0	0
chr22	24134069	24134069	C	T	exonic	SMARCB1	nonsynonymous SNV	p.P74S	c.220C>T		1	0	0	N
chr22	24143256	24143256	C	T	exonic	SMARCB1	nonsynonymous SNV	p.T163I	c.488C>T		1	0	0	D
chr22	24176353	24176353	G	C	exonic	SMARCB1	nonsynonymous SNV	p.A382P	c.1144G>C		1	0	0	D
chr22	24176356	24176356	C	T	exonic	SMARCB1	nonsynonymous SNV	p.P383S	c.1147C>T		1	0	0	D
chr22	24176357	24176357	C	T	exonic	SMARCB1	nonsynonymous SNV	p.P383L	c.1148C>T		1	0	0	D	ID=COSM5991513;OCCURENCE=1(skin)
chr22	24176359	24176359	G	T	exonic	SMARCB1	nonsynonymous SNV	p.A384S	c.1150G>T		1	0	0	D
chr22	24176359	24176359	G	-	exonic	SMARCB1	frameshift deletion	p.A384Pfs*99	c.1150delG		1	0	0
chr3	10183799	10183799	A	G	exonic	VHL	nonsynonymous SNV	p.N90D	c.268A>G		1	0	0	D
chr3	10183800	10183800	C	-	exonic	VHL	frameshift deletion	p.N90Tfs*69	c.269delA		1	0	0		ID=COSM17882;OCCURENCE=3(kidney),1(lung)
chr3	10183812	10183812	A	T	exonic	VHL	nonsynonymous SNV	p.E94V	c.281A>T		1	0	0	D
chr3	10183817	10183817	C	T	exonic	VHL	stopgain	p.Q96	c.286_288		1	0	0		ID=COSM17658;OCCURENCE=2(soft_tissue),9(kidney),1(lung)
chr3	10183818	10183818	A	G	exonic	VHL	nonsynonymous SNV	p.Q96R	c.287A>G		1	0	0	D
chr3	10183824	10183824	A	-	exonic	VHL	frameshift deletion	p.Y98Sfs*61	c.293delA		1	0	0		ID=COSM14360;OCCURENCE=1(kidney)
chr3	10183850	10183850	C	T	exonic	VHL	nonsynonymous SNV	p.R107C	c.319C>T		1	0	0	D	ID=COSM5030964;OCCURENCE=1(salivary_gland)
chr3	10183862	10183862	A	T	exonic	VHL	nonsynonymous SNV	p.S111C	c.331A>T		1	0	0	D
chr3	10183871	10183871	G	T	exonic	VHL	nonsynonymous SNV	p.G114C	c.340G>T		1	0	G114C	D	ID=COSM17642;OCCURENCE=8(kidney)
chr3	10188299	10188299	T	C	exonic	VHL	nonsynonymous SNV	p.F148L	c.442T>C		1	0	0	D
chr3	10191488	10191488	C	T	exonic	VHL	stopgain	p.R161	c.481_483	rs5030818	1	0	R1611		ID=COSM17612;OCCURENCE=1(stomach),2(soft_tissue),19(kidney),1(pancreas),1(skin),1(prostate),1(paratesticular_tissues)
chr3	10191494	10191494	C	A	exonic	VHL	nonsynonymous SNV	p.L163I	c.487C>A		1	0	0	D
chr3	10191555	10191555	C	T	exonic	VHL	nonsynonymous SNV	p.S183L	c.548C>T	rs5030823	1	0	0	D	ID=COSM6506469;OCCURENCE=1(kidney)
chr3	10191574	10191574	A	C	exonic	VHL	nonsynonymous SNV	p.E189D	c.567A>C		1	0	0	D
chr3	10191579	10191579	A	T	exonic	VHL	nonsynonymous SNV	p.H191L	c.572A>T		1	0	0	D
chr3	10191581	10191581	C	T	exonic	VHL	nonsynonymous SNV	p.P192S	c.574C>T	rs28940300	1	0	0	D	ID=COSM18386;OCCURENCE=2(kidney),1(pancreas)
chr3	10191587	10191587	G	C	exonic	VHL	nonsynonymous SNV	p.V194L	c.580G>C		1	0	0	D
chr3	10191602	10191602	G	A	exonic	VHL	nonsynonymous SNV	p.E199K	c.595G>A		1	0	0	D
chr3	37067242	37067242	C	T	exonic	MLH1	nonsynonymous SNV	p.R385C	c.1153C>T	rs63750760	1	0	0	D	ID=COSM1422593;OCCURENCE=2(NS),1(haematopoietic_and_lymphoid_tissue),1(skin),1(large_intestine)
chr3	37067254	37067254	C	T	exonic	MLH1	nonsynonymous SNV	p.R389W	c.1165C>T	rs61751644	1	0	0	D
chr3	37067257	37067257	G	-	exonic	MLH1	frameshift deletion	p.E390Nfs*11	c.1168delG		1	0	0
chr3	37067296	37067296	C	T	exonic	MLH1	nonsynonymous SNV	p.P403S	c.1207C>T	rs587778897	1	0	0	N
chr3	37067307	37067307	T	G	exonic	MLH1	nonsynonymous SNV	p.S406R	c.1218T>G		1	0	0	D
chr3	37067312	37067312	C	T	exonic	MLH1	nonsynonymous SNV	p.P408L	c.1223C>T		1	0	0	N
chr3	37067318	37067318	C	T	exonic	MLH1	nonsynonymous SNV	p.A410V	c.1229C>T	rs761006237	1	0	0	N
chr3	41266037	41266037	A	C	exonic	CTNNB1	nonsynonymous SNV	p.M12L	c.34A>C		0	1	0	N
chr3	41266043	41266043	C	-	exonic	CTNNB1	frameshift deletion	p.M14Wfs*33	c.40delA		0	1	0
chr3	41266050	41266050	C	-	exonic	CTNNB1	frameshift deletion	p.P16Qfs*31	c.47delC		0	1	0
chr3	41266053	41266053	A	T	exonic	CTNNB1	nonsynonymous SNV	p.D17V	c.50A>T		0	1	0	N
chr3	41266062	41266062	C	T	exonic	CTNNB1	nonsynonymous SNV	p.A20V	c.59C>T	rs757325337	0	1	0	N	ID=COSM5702;OCCURENCE=1(thyroid),1(large_intestine)
chr3	41266064	41266064	G	C	exonic	CTNNB1	nonsynonymous SNV	p.A21P	c.61G>C		0	1	0	N
chr3	41266079	41266079	C	T	exonic	CTNNB1	stopgain	p.Q26	c.76_78		0	1	0
chr3	41266082	41266082	C	-	exonic	CTNNB1	frameshift deletion	p.Q27Nfs*20	c.79delC		0	1	0
chr3	41266092	41266092	A	T	exonic	CTNNB1	nonsynonymous SNV	p.Y30F	c.89A>T		0	1	0	D
chr3	41266097	41266097	G	-	exonic	CTNNB1	frameshift deletion	p.D32	c.94_96		0	1	D322
chr3	41266100	41266102	CTG	-	exonic	CTNNB1	nonframeshift deletion	p.S33_G34delinsTER	c.97_102delinsACAGAGAGG		0	1	0		ID=COSM5010425;OCCURENCE=1(large_intestine)
chr3	41266113	41266113	C	G	exonic	CTNNB1	nonsynonymous SNV	p.S37C	c.110C>G	rs121913403	0	1	S37C	D	ID=COSM5679;OCCURENCE=28(ovary),1(bone),7(stomach),1(kidney),4(urinary_tract),1(soft_tissue),7(pancreas),46(liver),1(oesophagus),2(adrenal_gland),13(pituitary),4(skin),2(prostate),12(lung),1(cervix),2(large_intestine),8(central_nervous_system),10(biliary_tract),39(endometrium)
chr3	41266119	41266119	C	T	exonic	CTNNB1	nonsynonymous SNV	p.A39V	c.116C>T		0	1	0	N	ID=COSM5990128;OCCURENCE=1(liver),1(large_intestine)
chr3	41266122	41266122	C	T	exonic	CTNNB1	nonsynonymous SNV	p.T40I	c.119C>T	rs1057519837	0	1	P23-71I	N	ID=COSM5708;OCCURENCE=1(ovary),1(bone),3(soft_tissue),8(thyroid),1(endometrium)
chr3	41266124	41266124	A	G	exonic	CTNNB1	nonsynonymous SNV	p.T41A	c.121A>G	rs121913412	0	1	T41A	D	ID=COSM5664;OCCURENCE=6(ovary),4(breast),1(bone),1(NS),2(stomach),2(haematopoietic_and_lymphoid_tissue),1(urinary_tract),19(kidney),818(soft_tissue),2(pancreas),176(liver),1(pituitary),9(adrenal_gland),8(skin),10(prostate),2(lung),2(upper_aerodigestive_tract),60(large_intestine),1(central_nervous_system),3(small_intestine),8(biliary_tract),17(endometrium)
chr3	41266128	41266128	C	T	exonic	CTNNB1	nonsynonymous SNV	p.T42I	c.125C>T	rs769203968	0	1	0	N	ID=COSM5696;OCCURENCE=1(vulva),1(stomach),1(soft_tissue),2(liver),1(thyroid)
chr3	41266137	41266137	C	T	exonic	CTNNB1	nonsynonymous SNV	p.S45F	c.134C>T	rs121913409	0	1	S45F	N	ID=COSM5667;OCCURENCE=1(vulva),2(ovary),8(NS),1(stomach),1(haematopoietic_and_lymphoid_tissue),1(urinary_tract),34(kidney),440(soft_tissue),3(pancreas),76(liver),38(adrenal_gland),7(skin),2(prostate),1(lung),1(cervix),71(large_intestine),2(central_nervous_system),6(biliary_tract),15(endometrium)
chr3	41266146	41266146	G	T	exonic	CTNNB1	nonsynonymous SNV	p.G48V	c.143G>T		0	1	0	N	ID=COSM5755;OCCURENCE=2(stomach)
chr3	178916863	178916863	G	A	exonic	PIK3CA	nonsynonymous SNV	p.D84N	c.250G>A		0	1	0	D	ID=COSM5515965,COSM5515964;OCCURENCE=1(biliary_tract)	Breast Cancer,EL:3A:Buparlisib, Serabelisib, Alpelisib + Fulvestrant, Copanlisib, GDC-0077, Taselisib + Fulvestrant, Alpelisib, Buparlisib + Fulvestrant, Taselisib(28490463, 25877889, 22049316, 24652201, 23662903, 24608574, 22188813, 27672108, 25172762)
chr3	178916867	178916867	A	T	exonic	PIK3CA	nonsynonymous SNV	p.E85V	c.254A>T		0	1	0	D		Breast Cancer,EL:3A:Buparlisib, Serabelisib, Alpelisib + Fulvestrant, Copanlisib, GDC-0077, Taselisib + Fulvestrant, Alpelisib, Buparlisib + Fulvestrant, Taselisib(28490463, 25877889, 22049316, 24652201, 23662903, 24608574, 22188813, 27672108, 25172762)
chr3	178916876	178916876	G	A	exonic	PIK3CA	nonsynonymous SNV	p.R88Q	c.263G>A	rs121913287	0	1	R88Q	D	ID=COSM271684,COSM746;OCCURENCE=1(ovary),3(breast),8(stomach),3(urinary_tract),3(pancreas),2(oesophagus),1(prostate),2(cervix),49(large_intestine),12(central_nervous_system),77(endometrium)	Breast Cancer,EL:3A:Buparlisib, Serabelisib, Alpelisib + Fulvestrant, Copanlisib, GDC-0077, Taselisib + Fulvestrant, Alpelisib, Buparlisib + Fulvestrant, Taselisib(28490463, 25877889, 22049316, 24652201, 23662903, 24608574, 22188813, 27672108, 25172762)
chr3	178916894	178916894	T	C	exonic	PIK3CA	nonsynonymous SNV	p.L94P	c.281T>C		0	1	0	N
chr3	178916903	178916903	C	T	exonic	PIK3CA	nonsynonymous SNV	p.P97L	c.290C>T		0	1	0	D		Breast Cancer,EL:3A:Buparlisib, Serabelisib, Alpelisib + Fulvestrant, Copanlisib, GDC-0077, Taselisib + Fulvestrant, Alpelisib, Buparlisib + Fulvestrant, Taselisib(28490463, 25877889, 22049316, 24652201, 23662903, 24608574, 22188813, 27672108, 25172762)
chr3	178916924	178916924	C	T	exonic	PIK3CA	nonsynonymous SNV	p.P104L	c.311C>T	rs863225060	0	1	P104L	D	ID=COSM163485,COSM1484857;OCCURENCE=5(breast),1(NS),1(skin),1(large_intestine),1(endometrium)	Breast Cancer,EL:3A:Buparlisib, Serabelisib, Alpelisib + Fulvestrant, Copanlisib, GDC-0077, Taselisib + Fulvestrant, Alpelisib, Buparlisib + Fulvestrant, Taselisib(28490463, 25877889, 22049316, 24652201, 23662903, 24608574, 22188813, 27672108, 25172762)
chr3	178916935	178916935	C	T	exonic	PIK3CA	nonsynonymous SNV	p.R108C	c.322C>T		0	1	0	D	ID=COSM6438095;OCCURENCE=1(large_intestine)	Breast Cancer,EL:3A:Buparlisib, Serabelisib, Alpelisib + Fulvestrant, Copanlisib, GDC-0077, Taselisib + Fulvestrant, Alpelisib, Buparlisib + Fulvestrant, Taselisib(28490463, 25877889, 22049316, 24652201, 23662903, 24608574, 22188813, 27672108, 25172762)
chr3	178921552	178921552	A	G	exonic	PIK3CA	nonsynonymous SNV	p.N345S	c.1034A>G		0	1	0	D	ID=COSM13476;OCCURENCE=1(skin),2(endometrium)	Breast Cancer,EL:3A:Buparlisib, Serabelisib, Alpelisib + Fulvestrant, Copanlisib, GDC-0077, Taselisib + Fulvestrant, Alpelisib, Buparlisib + Fulvestrant, Taselisib(28490463, 25877889, 22049316, 24652201, 23662903, 24608574, 22188813, 27672108, 25172762)
chr3	178921557	178921557	A	G	exonic	PIK3CA	nonsynonymous SNV	p.N347D	c.1039A>G		0	1	0	D		Breast Cancer,EL:3A:Buparlisib, Serabelisib, Alpelisib + Fulvestrant, Copanlisib, GDC-0077, Taselisib + Fulvestrant, Alpelisib, Buparlisib + Fulvestrant, Taselisib(28490463, 25877889, 22049316, 24652201, 23662903, 24608574, 22188813, 27672108, 25172762)
chr3	178921563	178921563	C	T	exonic	PIK3CA	stopgain	p.R349	c.1045_1047		0	1	0		ID=COSM29614;OCCURENCE=1(upper_aerodigestive_tract)
chr3	178921566	178921566	G	A	exonic	PIK3CA	nonsynonymous SNV	p.D350N	c.1048G>A	rs1064793349	0	1	D350N	N	ID=COSM582510,COSM582511;OCCURENCE=1(skin),1(lung),1(large_intestine),1(endometrium)
chr3	178921576	178921576	A	T	exonic	PIK3CA	nonsynonymous SNV	p.K353M	c.1058A>T		0	1	0	D		Breast Cancer,EL:3A:Buparlisib, Serabelisib, Alpelisib + Fulvestrant, Copanlisib, GDC-0077, Taselisib + Fulvestrant, Alpelisib, Buparlisib + Fulvestrant, Taselisib(28490463, 25877889, 22049316, 24652201, 23662903, 24608574, 22188813, 27672108, 25172762)
chr3	178921577	178921577	G	C	exonic	PIK3CA	nonsynonymous SNV	p.K353N	c.1059G>C		0	1	0	D		Breast Cancer,EL:3A:Buparlisib, Serabelisib, Alpelisib + Fulvestrant, Copanlisib, GDC-0077, Taselisib + Fulvestrant, Alpelisib, Buparlisib + Fulvestrant, Taselisib(28490463, 25877889, 22049316, 24652201, 23662903, 24608574, 22188813, 27672108, 25172762)
chr3	178927986	178927986	T	G	exonic	PIK3CA	nonsynonymous SNV	p.L422V	c.1264T>G		0	1	0	D		Breast Cancer,EL:3A:Buparlisib, Serabelisib, Alpelisib + Fulvestrant, Copanlisib, GDC-0077, Taselisib + Fulvestrant, Alpelisib, Buparlisib + Fulvestrant, Taselisib(28490463, 25877889, 22049316, 24652201, 23662903, 24608574, 22188813, 27672108, 25172762)
chr3	178927995	178927995	G	A	exonic	PIK3CA	nonsynonymous SNV	p.G425R	c.1273G>A		0	1	0	D		Breast Cancer,EL:3A:Buparlisib, Serabelisib, Alpelisib + Fulvestrant, Copanlisib, GDC-0077, Taselisib + Fulvestrant, Alpelisib, Buparlisib + Fulvestrant, Taselisib(28490463, 25877889, 22049316, 24652201, 23662903, 24608574, 22188813, 27672108, 25172762)
chr3	178928019	178928019	A	-	exonic	PIK3CA	frameshift deletion	p.T433	c.1297_1299		0	1	0
chr3	178928035	178928035	C	G	exonic	PIK3CA	nonsynonymous SNV	p.S438C	c.1313C>G		0	1	0	D		Breast Cancer,EL:3A:Buparlisib, Serabelisib, Alpelisib + Fulvestrant, Copanlisib, GDC-0077, Taselisib + Fulvestrant, Alpelisib, Buparlisib + Fulvestrant, Taselisib(28490463, 25877889, 22049316, 24652201, 23662903, 24608574, 22188813, 27672108, 25172762)
chr3	178928038	178928038	G	A	exonic	PIK3CA	nonsynonymous SNV	p.G439E	c.1316G>A		0	1	0	D		Breast Cancer,EL:3A:Buparlisib, Serabelisib, Alpelisib + Fulvestrant, Copanlisib, GDC-0077, Taselisib + Fulvestrant, Alpelisib, Buparlisib + Fulvestrant, Taselisib(28490463, 25877889, 22049316, 24652201, 23662903, 24608574, 22188813, 27672108, 25172762)
chr3	178928047	178928047	C	T	exonic	PIK3CA	nonsynonymous SNV	p.A442V	c.1325C>T		0	1	0	N
chr3	178928052	178928052	A	T	exonic	PIK3CA	nonsynonymous SNV	p.N444Y	c.1330A>T		0	1	0	N
chr3	178936082	178936082	G	A	exonic	PIK3CA	nonsynonymous SNV	p.E542K	c.1624G>A	rs121913273	0	1	E542K	N	ID=COSM760,COSM125369;OCCURENCE=9(salivary_gland),5(vulva),30(ovary),1(bone),323(breast),4(penis),4(haematopoietic_and_lymphoid_tissue),27(stomach),5(kidney),13(soft_tissue),55(urinary_tract),3(pancreas),11(liver),1(genital_tract),23(oesophagus),5(gastrointestinal_tract_(site_indeterminate)),1(pituitary),26(skin),2(prostate),26(lung),15(thyroid),30(cervix),36(upper_aerodigestive_tract),392(large_…
chr3	178936083	178936083	A	T	exonic	PIK3CA	nonsynonymous SNV	p.E542V	c.1625A>T	rs1057519927	0	1	E542V	N	ID=COSM1041493,COSM762;OCCURENCE=1(ovary),4(breast),1(soft_tissue),5(large_intestine),2(central_nervous_system),3(endometrium)
chr3	178936091	178936091	G	A	exonic	PIK3CA	nonsynonymous SNV	p.E545K	c.1633G>A	rs104886003	0	1	E545K	N	ID=COSM763,COSM125370;OCCURENCE=20(salivary_gland),16(vulva),40(ovary),2(bone),513(breast),4(penis),1(NS),1(haematopoietic_and_lymphoid_tissue),50(stomach),6(kidney),10(soft_tissue),126(urinary_tract),4(pancreas),1(peritoneum),1(parathyroid),8(liver),64(oesophagus),7(gastrointestinal_tract_(site_indeterminate)),1(pituitary),25(skin),5(prostate),69(lung),8(thyroid),64(cervix),75(upper_aerodigestiv…
chr3	178936092	178936092	A	G	exonic	PIK3CA	nonsynonymous SNV	p.E545G	c.1634A>G	rs121913274	0	1	E545G	D	ID=COSM764,COSM125371;OCCURENCE=2(ovary),18(breast),1(NS),2(haematopoietic_and_lymphoid_tissue),4(stomach),8(urinary_tract),5(liver),1(pituitary),9(skin),1(prostate),2(lung),1(cervix),5(upper_aerodigestive_tract),1(eye),72(large_intestine),1(central_nervous_system),10(endometrium)	Breast Cancer,EL:3A:Buparlisib, Serabelisib, Alpelisib + Fulvestrant, Copanlisib, GDC-0077, Taselisib + Fulvestrant, Alpelisib, Buparlisib + Fulvestrant, Taselisib(28490463, 25877889, 22049316, 24652201, 23662903, 24608574, 22188813, 27672108, 25172762)
chr3	178936095	178936095	A	G	exonic	PIK3CA	nonsynonymous SNV	p.Q546R	c.1637A>G	rs397517201	0	1	Q546R	N	ID=COSM446012,COSM12459;OCCURENCE=1(salivary_gland),5(ovary),16(breast),1(stomach),1(pancreas),1(skin),1(prostate),2(cervix),3(upper_aerodigestive_tract),22(large_intestine),2(central_nervous_system),1(small_intestine),18(endometrium)
chr3	178936119	178936119	A	G	exonic	PIK3CA	nonsynonymous SNV	p.H554R	c.1661A>G		0	1	0	N
chr3	178938859	178938859	C	T	exonic	PIK3CA	nonsynonymous SNV	p.H701Y	c.2101C>T		0	1	0	N	ID=COSM6438101;OCCURENCE=1(large_intestine)
chr3	178938863	178938863	T	C	exonic	PIK3CA	nonsynonymous SNV	p.L702P	c.2105T>C		0	1	0	D		Breast Cancer,EL:3A:Buparlisib, Serabelisib, Alpelisib + Fulvestrant, Copanlisib, GDC-0077, Taselisib + Fulvestrant, Alpelisib, Buparlisib + Fulvestrant, Taselisib(28490463, 25877889, 22049316, 24652201, 23662903, 24608574, 22188813, 27672108, 25172762)
chr3	178938863	178938863	T	A	exonic	PIK3CA	nonsynonymous SNV	p.L702Q	c.2105T>A		0	1	0	D	ID=COSM6438087;OCCURENCE=1(large_intestine)	Breast Cancer,EL:3A:Buparlisib, Serabelisib, Alpelisib + Fulvestrant, Copanlisib, GDC-0077, Taselisib + Fulvestrant, Alpelisib, Buparlisib + Fulvestrant, Taselisib(28490463, 25877889, 22049316, 24652201, 23662903, 24608574, 22188813, 27672108, 25172762)
chr3	178938883	178938883	A	C	exonic	PIK3CA	nonsynonymous SNV	p.M709L	c.2125A>C		0	1	0	N
chr3	178938883	178938883	A	G	exonic	PIK3CA	nonsynonymous SNV	p.M709V	c.2125A>G		0	1	0	N
chr3	178938886	178938886	G	T	exonic	PIK3CA	stopgain	p.E710	c.2128_2130		0	1	0
chr3	178938913	178938913	C	T	exonic	PIK3CA	nonsynonymous SNV	p.L719F	c.2155C>T		0	1	0	D		Breast Cancer,EL:3A:Buparlisib, Serabelisib, Alpelisib + Fulvestrant, Copanlisib, GDC-0077, Taselisib + Fulvestrant, Alpelisib, Buparlisib + Fulvestrant, Taselisib(28490463, 25877889, 22049316, 24652201, 23662903, 24608574, 22188813, 27672108, 25172762)
chr3	178938919	178938919	C	T	exonic	PIK3CA	stopgain	p.Q721	c.2161_2163		0	1	0
chr3	178938929	178938929	A	G	exonic	PIK3CA	nonsynonymous SNV	p.K724R	c.2171A>G		0	1	0	D		Breast Cancer,EL:3A:Buparlisib, Serabelisib, Alpelisib + Fulvestrant, Copanlisib, GDC-0077, Taselisib + Fulvestrant, Alpelisib, Buparlisib + Fulvestrant, Taselisib(28490463, 25877889, 22049316, 24652201, 23662903, 24608574, 22188813, 27672108, 25172762)
chr3	178938934	178938934	G	C	exonic	PIK3CA	nonsynonymous SNV	p.E726Q	c.2176G>C		0	1	0	D		Breast Cancer,EL:3A:Buparlisib, Serabelisib, Alpelisib + Fulvestrant, Copanlisib, GDC-0077, Taselisib + Fulvestrant, Alpelisib, Buparlisib + Fulvestrant, Taselisib(28490463, 25877889, 22049316, 24652201, 23662903, 24608574, 22188813, 27672108, 25172762)
chr3	178938935	178938935	A	G	exonic	PIK3CA	nonsynonymous SNV	p.E726G	c.2177A>G		0	1	0	D		Breast Cancer,EL:3A:Buparlisib, Serabelisib, Alpelisib + Fulvestrant, Copanlisib, GDC-0077, Taselisib + Fulvestrant, Alpelisib, Buparlisib + Fulvestrant, Taselisib(28490463, 25877889, 22049316, 24652201, 23662903, 24608574, 22188813, 27672108, 25172762)
chr3	178938935	178938935	A	T	exonic	PIK3CA	nonsynonymous SNV	p.E726V	c.2177A>T		0	1	0	D		Breast Cancer,EL:3A:Buparlisib, Serabelisib, Alpelisib + Fulvestrant, Copanlisib, GDC-0077, Taselisib + Fulvestrant, Alpelisib, Buparlisib + Fulvestrant, Taselisib(28490463, 25877889, 22049316, 24652201, 23662903, 24608574, 22188813, 27672108, 25172762)
chr3	178938941	178938941	A	T	exonic	PIK3CA	nonsynonymous SNV	p.Q728L	c.2183A>T		0	1	0	N
chr3	178951922	178951922	C	T	exonic	PIK3CA	stopgain	p.Q993	c.2977_2979		0	1	0
chr3	178951931	178951931	A	C	exonic	PIK3CA	nonsynonymous SNV	p.N996H	c.2986A>C		0	1	0	D		Breast Cancer,EL:3A:Buparlisib, Serabelisib, Alpelisib + Fulvestrant, Copanlisib, GDC-0077, Taselisib + Fulvestrant, Alpelisib, Buparlisib + Fulvestrant, Taselisib(28490463, 25877889, 22049316, 24652201, 23662903, 24608574, 22188813, 27672108, 25172762)
chr3	178951931	178951931	A	G	exonic	PIK3CA	nonsynonymous SNV	p.N996D	c.2986A>G		0	1	0	N
chr3	178951932	178951932	A	T	exonic	PIK3CA	nonsynonymous SNV	p.N996I	c.2987A>T		0	1	0	D		Breast Cancer,EL:3A:Buparlisib, Serabelisib, Alpelisib + Fulvestrant, Copanlisib, GDC-0077, Taselisib + Fulvestrant, Alpelisib, Buparlisib + Fulvestrant, Taselisib(28490463, 25877889, 22049316, 24652201, 23662903, 24608574, 22188813, 27672108, 25172762)
chr3	178951934	178951934	C	T	exonic	PIK3CA	nonsynonymous SNV	p.L997F	c.2989C>T		0	1	0	D		Breast Cancer,EL:3A:Buparlisib, Serabelisib, Alpelisib + Fulvestrant, Copanlisib, GDC-0077, Taselisib + Fulvestrant, Alpelisib, Buparlisib + Fulvestrant, Taselisib(28490463, 25877889, 22049316, 24652201, 23662903, 24608574, 22188813, 27672108, 25172762)
chr3	178951951	178951951	C	-	exonic	PIK3CA	frameshift deletion	p.S1003Qfs*2	c.3006delC		0	1	0
chr3	178951952	178951952	T	A	exonic	PIK3CA	nonsynonymous SNV	p.S1003T	c.3007T>A		0	1	0	N
chr3	178951980	178951980	A	G	exonic	PIK3CA	nonsynonymous SNV	p.E1012G	c.3035A>G		0	1	0	D		Breast Cancer,EL:3A:Buparlisib, Serabelisib, Alpelisib + Fulvestrant, Copanlisib, GDC-0077, Taselisib + Fulvestrant, Alpelisib, Buparlisib + Fulvestrant, Taselisib(28490463, 25877889, 22049316, 24652201, 23662903, 24608574, 22188813, 27672108, 25172762)
chr3	178952000	178952000	A	G	exonic	PIK3CA	nonsynonymous SNV	p.I1019V	c.3055A>G		0	1	0	N	ID=COSM249140;OCCURENCE=1(central_nervous_system)
chr3	178952004	178952004	C	T	exonic	PIK3CA	nonsynonymous SNV	p.A1020V	c.3059C>T		0	1	0	D	ID=COSM28938;OCCURENCE=3(breast),1(large_intestine)	Breast Cancer,EL:3A:Buparlisib, Serabelisib, Alpelisib + Fulvestrant, Copanlisib, GDC-0077, Taselisib + Fulvestrant, Alpelisib, Buparlisib + Fulvestrant, Taselisib(28490463, 25877889, 22049316, 24652201, 23662903, 24608574, 22188813, 27672108, 25172762)
chr3	178952012	178952012	C	T	exonic	PIK3CA	stopgain	p.R1023	c.3067_3069		0	1	0		ID=COSM1420971;OCCURENCE=1(ovary),1(large_intestine),1(endometrium)
chr3	178952013	178952013	G	A	exonic	PIK3CA	nonsynonymous SNV	p.R1023Q	c.3068G>A		0	1	0	N	ID=COSM13594,COSM4621151;OCCURENCE=1(skin),2(lung),2(large_intestine),1(endometrium)
chr3	178952019	178952019	C	T	exonic	PIK3CA	nonsynonymous SNV	p.T1025I	c.3074C>T		0	1	0	D	ID=COSM36285,COSM1666840;OCCURENCE=1(breast),2(lung),2(endometrium)	Breast Cancer,EL:3A:Buparlisib, Serabelisib, Alpelisib + Fulvestrant, Copanlisib, GDC-0077, Taselisib + Fulvestrant, Alpelisib, Buparlisib + Fulvestrant, Taselisib(28490463, 25877889, 22049316, 24652201, 23662903, 24608574, 22188813, 27672108, 25172762)
chr3	178952025	178952025	C	T	exonic	PIK3CA	nonsynonymous SNV	p.A1027V	c.3080C>T		0	1	0	D		Breast Cancer,EL:3A:Buparlisib, Serabelisib, Alpelisib + Fulvestrant, Copanlisib, GDC-0077, Taselisib + Fulvestrant, Alpelisib, Buparlisib + Fulvestrant, Taselisib(28490463, 25877889, 22049316, 24652201, 23662903, 24608574, 22188813, 27672108, 25172762)
chr3	178952032	178952032	T	G	exonic	PIK3CA	nonsynonymous SNV	p.D1029E	c.3087T>G		0	1	0	N	ID=COSM27148;OCCURENCE=1(lung)
chr3	178952039	178952039	G	A	exonic	PIK3CA	nonsynonymous SNV	p.E1032K	c.3094G>A		0	1	0	D	ID=COSM6438102;OCCURENCE=1(large_intestine)	Breast Cancer,EL:3A:Buparlisib, Serabelisib, Alpelisib + Fulvestrant, Copanlisib, GDC-0077, Taselisib + Fulvestrant, Alpelisib, Buparlisib + Fulvestrant, Taselisib(28490463, 25877889, 22049316, 24652201, 23662903, 24608574, 22188813, 27672108, 25172762)
chr3	178952042	178952042	C	T	exonic	PIK3CA	stopgain	p.Q1033	c.3097_3099		0	1	0		ID=COSM6475721,COSM6475722;OCCURENCE=1(large_intestine)
chr3	178952048	178952048	G	A	exonic	PIK3CA	nonsynonymous SNV	p.A1035T	c.3103G>A		0	1	0	D	ID=COSM27375,COSM6041463;OCCURENCE=1(urinary_tract),1(soft_tissue),1(upper_aerodigestive_tract),2(large_intestine),1(endometrium)	Breast Cancer,EL:3A:Buparlisib, Serabelisib, Alpelisib + Fulvestrant, Copanlisib, GDC-0077, Taselisib + Fulvestrant, Alpelisib, Buparlisib + Fulvestrant, Taselisib(28490463, 25877889, 22049316, 24652201, 23662903, 24608574, 22188813, 27672108, 25172762)
chr3	178952077	178952077	T	G	exonic	PIK3CA	nonsynonymous SNV	p.N1044K	c.3132T>G		0	1	N1044K	N	ID=COSM1041522,COSM27504;OCCURENCE=5(breast),1(prostate),2(large_intestine),2(endometrium)
chr3	178952078	178952078	G	A	exonic	PIK3CA	nonsynonymous SNV	p.D1045N	c.3133G>A		0	1	0	D	ID=COSM1421002,COSM25086;OCCURENCE=1(haematopoietic_and_lymphoid_tissue),1(stomach),2(liver),1(lung),5(large_intestine),1(small_intestine)	Breast Cancer,EL:3A:Buparlisib, Serabelisib, Alpelisib + Fulvestrant, Copanlisib, GDC-0077, Taselisib + Fulvestrant, Alpelisib, Buparlisib + Fulvestrant, Taselisib(28490463, 25877889, 22049316, 24652201, 23662903, 24608574, 22188813, 27672108, 25172762)
chr3	178952081	178952081	G	A	exonic	PIK3CA	nonsynonymous SNV	p.A1046T	c.3136G>A		0	1	0	D	ID=COSM27273;OCCURENCE=1(breast),7(large_intestine)	Breast Cancer,EL:3A:Buparlisib, Serabelisib, Alpelisib + Fulvestrant, Copanlisib, GDC-0077, Taselisib + Fulvestrant, Alpelisib, Buparlisib + Fulvestrant, Taselisib(28490463, 25877889, 22049316, 24652201, 23662903, 24608574, 22188813, 27672108, 25172762)
chr3	178952085	178952085	A	T	exonic	PIK3CA	nonsynonymous SNV	p.H1047L	c.3140A>T	rs121913279	0	1	H1047L	N	ID=COSM776,COSM94987;OCCURENCE=1(salivary_gland),1(vulva),8(ovary),1(bone),159(breast),2(stomach),11(haematopoietic_and_lymphoid_tissue),1(kidney),10(urinary_tract),19(soft_tissue),2(pancreas),3(liver),4(oesophagus),1(gastrointestinal_tract_(site_indeterminate)),1(pituitary),4(skin),5(lung),2(thyroid),1(cervix),10(upper_aerodigestive_tract),69(large_intestine),7(central_nervous_system),5(biliary_…
chr3	178952085	178952085	A	G	exonic	PIK3CA	nonsynonymous SNV	p.H1047R	c.3140A>G	rs121913279	0	1	H1047R	N	ID=COSM94986,COSM775;OCCURENCE=22(salivary_gland),1(vulva),102(ovary),13(bone),1347(breast),11(NS),40(stomach),4(haematopoietic_and_lymphoid_tissue),5(kidney),54(soft_tissue),30(urinary_tract),7(pancreas),1(parathyroid),19(liver),15(oesophagus),8(gastrointestinal_tract_(site_indeterminate)),2(pituitary),11(skin),14(prostate),23(lung),2(meninges),9(thyroid),6(cervix),55(upper_aerodigestive_tract),…
chr3	178952120	178952120	T	C	exonic	PIK3CA	nonsynonymous SNV	p.F1059L	c.3175T>C		0	1	0	D		Breast Cancer,EL:3A:Buparlisib, Serabelisib, Alpelisib + Fulvestrant, Copanlisib, GDC-0077, Taselisib + Fulvestrant, Alpelisib, Buparlisib + Fulvestrant, Taselisib(28490463, 25877889, 22049316, 24652201, 23662903, 24608574, 22188813, 27672108, 25172762)
chr4	1803565	1803565	G	T	exonic	FGFR3	nonsynonymous SNV	p.R248L	c.743G>T		0	1	0	D
chr4	1803576	1803576	C	T	exonic	FGFR3	nonsynonymous SNV	p.R252W	c.754C>T		0	1	0	D	ID=COSM6197939;OCCURENCE=1(large_intestine)
chr4	1803580	1803580	C	T	exonic	FGFR3	nonsynonymous SNV	p.P253L	c.758C>T		0	1	0	D
chr4	1803591	1803591	G	T	exonic	FGFR3	nonsynonymous SNV	p.A257S	c.769G>T		0	1	0	D
chr4	1803592	1803592	C	T	exonic	FGFR3	nonsynonymous SNV	p.A257V	c.770C>T	rs949596399	0	1	0	D
chr4	1803594	1803594	G	A	exonic	FGFR3	nonsynonymous SNV	p.G258R	c.772G>A		0	1	0	D
chr4	1803601	1803601	C	T	exonic	FGFR3	nonsynonymous SNV	p.P260L	c.779C>T	rs751038752	0	1	0	D
chr4	1803604	1803604	C	T	exonic	FGFR3	nonsynonymous SNV	p.A261V	c.782C>T		0	1	0	N
chr4	1803605	1803605	C	-	exonic	FGFR3	frameshift deletion	p.N262Tfs*32	c.783delC		0	1	0
chr4	1803624	1803624	G	T	exonic	FGFR3	nonsynonymous SNV	p.G268C	c.802G>T		0	1	0	D
chr4	1803663	1803663	G	C	exonic	FGFR3	nonsynonymous SNV	p.A281P	c.841G>C		0	1	0	N
chr4	1803663	1803663	G	T	exonic	FGFR3	nonsynonymous SNV	p.A281S	c.841G>T		0	1	0	N
chr4	1803664	1803664	C	T	exonic	FGFR3	nonsynonymous SNV	p.A281V	c.842C>T		0	1	0	D
chr4	1803669	1803669	C	T	exonic	FGFR3	nonsynonymous SNV	p.P283S	c.847C>T		0	1	0	D	ID=COSM1753648,COSM254688;OCCURENCE=3(urinary_tract),1(large_intestine)
chr4	1803672	1803672	C	-	exonic	FGFR3	frameshift deletion	p.H284Tfs*10	c.850delC		0	1	0		ID=COSM723;OCCURENCE=1(cervix),1(large_intestine)
chr4	1803680	1803680	G	T	exonic	FGFR3	nonsynonymous SNV	p.Q286H	c.858G>T		0	1	0	D
chr4	1803684	1803684	C	G	exonic	FGFR3	nonsynonymous SNV	p.L288V	c.862C>G		0	1	0	D
chr4	1806116	1806116	C	G	exonic	FGFR3	nonsynonymous SNV	p.Y381	c.1141_1143		0	1	0
chr4	1806137	1806137	T	C	exonic	FGFR3	nonsynonymous SNV	p.F386L	c.1156T>C		0	1	0	D
chr4	1806176	1806176	C	T	exonic	FGFR3	nonsynonymous SNV	p.R401C	c.1201C>T	rs370064407	0	1	0	D	ID=COSM296687;OCCURENCE=1(large_intestine)
chr4	1806180	1806180	G	C	exonic	FGFR3	nonsynonymous SNV	p.S402T	c.1205G>C		0	1	0	N
chr4	1806187	1806187	C	-	exonic	FGFR3	frameshift deletion	p.K405Qfs*93	c.1212dupC		0	1	0
chr4	1806201	1806201	G	T	exonic	FGFR3	nonsynonymous SNV	p.G409V	c.1226G>T		0	1	0	D
chr4	1806206	1806206	C	T	exonic	FGFR3	nonsynonymous SNV	p.P411S	c.1231C>T		0	1	0	D	ID=COSM5369792,COSM5369791;OCCURENCE=1(lung)
chr4	1806210	1806210	C	T	exonic	FGFR3	nonsynonymous SNV	p.T412I	c.1235C>T		0	1	0	D
chr4	1806218	1806218	A	G	exonic	FGFR3	nonsynonymous SNV	p.K415E	c.1243A>G		0	1	0	D
chr4	1806221	1806221	A	G	exonic	FGFR3	nonsynonymous SNV	p.I416V	c.1246A>G	rs780428794	0	1	0	N
chr4	1806228	1806228	G	T	exonic	FGFR3	nonsynonymous SNV	p.R418L	c.1253G>T		0	1	0	D
chr4	1806234	1806234	C	T	exonic	FGFR3	nonsynonymous SNV	p.P418L	c.1253C>T	rs781361431	0	1	0	D
chr4	1806235	1806235	G	-	exonic	FGFR3	frameshift deletion	p.L421Sfs*13	c.1260delG		0	1	0
chr4	1807869	1807869	A	G	exonic	FGFR3	nonsynonymous SNV	p.H645R	c.1934A>G		0	1	0	N
chr4	1807874	1807874	C	T	exonic	FGFR3	nonsynonymous SNV	p.L647F	c.1939C>T		0	1	0	N
chr4	1807896	1807896	C	T	exonic	FGFR3	nonsynonymous SNV	p.T653M	c.1958_1959delCCinsTG		0	1	0	D	ID=COSM6197941;OCCURENCE=1(large_intestine)
chr4	1807899	1807899	A	T	exonic	FGFR3	nonsynonymous SNV	p.N655I	c.1964A>T		0	1	0	N
chr4	1807993	1807993	C	T	exonic	FGFR3	nonsynonymous SNV	p.P659S	c.1975C>T		0	1	0	D	ID=COSM6197920;OCCURENCE=1(large_intestine)
chr4	1808347	1808347	A	G	exonic	FGFR3	nonsynonymous SNV	p.E704G	c.2111A>G		0	1	0	D
chr4	1808406	1808406	G	T	exonic	FGFR3	nonsynonymous SNV	p.D724Y	c.2170G>T		0	1	0	D
chr4	1808952	1808952	C	A	exonic	FGFR3	nonsynonymous SNV	p.P797H	c.2390C>A		0	1	0	D
chr4	1808952	1808952	C	T	exonic	FGFR3	nonsynonymous SNV	p.P797L	c.2390C>T		0	1	0	D
chr4	1808958	1808958	C	T	exonic	FGFR3	nonsynonymous SNV	p.A799V	c.2396C>T		0	1	0	N	ID=COSM5991473;OCCURENCE=1(skin)
chr4	1808963	1808963	C	T	exonic	FGFR3	nonsynonymous SNV	p.P801S	c.2401C>T		0	1	0	N
chr4	1808969	1808969	A	T	exonic	FGFR3	nonsynonymous SNV	p.S803C	c.2407A>T		0	1	0	N
chr4	1808971	1808971	T	G	exonic	FGFR3	nonsynonymous SNV	p.S803R	c.2409T>G		0	1	0	N
chr4	1808985	1808985	C	T	exonic	FGFR3	nonsynonymous SNV	p.T808M	c.2423C>T	rs374547489	0	1	0	N	ID=COSM1428742,COSM1428743;OCCURENCE=1(vulva),1(large_intestine)
chr4	55141012	55141012	C	T	exonic	PDGFRA	nonsynonymous SNV	p.P553L	c.1658C>T	rs1060501502	0	1	0	D	ID=COSM4755600;OCCURENCE=1(stomach),1(peritoneum)	Gastrointestinal Stromal Tumor,EL:2A:Imatinib(24963404, 15928335)
chr4	55141043	55141043	A	C	exonic	PDGFRA	nonsynonymous SNV	p.E563D	c.1689A>C		0	1	0	D		Gastrointestinal Stromal Tumor,EL:2A:Imatinib(24963404, 15928335)
chr4	55141050	55141050	A	G	exonic	PDGFRA	nonsynonymous SNV	p.S566G	c.1696A>G		0	1	0	D		Gastrointestinal Stromal Tumor,EL:2A:Imatinib(24963404, 15928335)
chr4	55141063	55141063	A	G	exonic	PDGFRA	nonsynonymous SNV	p.H570R	c.1709A>G		0	1	0	D		Gastrointestinal Stromal Tumor,EL:2A:Imatinib(24963404, 15928335)
chr4	55141071	55141071	A	T	exonic	PDGFRA	nonsynonymous SNV	p.I573F	c.1717A>T		0	1	0	D		Gastrointestinal Stromal Tumor,EL:2A:Imatinib(24963404, 15928335)
chr4	55141096	55141096	C	T	exonic	PDGFRA	nonsynonymous SNV	p.P581L	c.1742C>T		0	1	0	D		Gastrointestinal Stromal Tumor,EL:2A:Imatinib(24963404, 15928335)
chr4	55141098	55141098	T	-	exonic	PDGFRA	frameshift deletion	p.Y582	c.1744_1746		0	1	0
chr4	55141112	55141112	G	T	exonic	PDGFRA	nonsynonymous SNV	p.W586C	c.1758G>T		0	1	0	D		Gastrointestinal Stromal Tumor,EL:2A:Imatinib(24963404, 15928335)
chr4	55141120	55141120	C	A	exonic	PDGFRA	nonsynonymous SNV	p.P589Q	c.1766C>A		0	1	0	D		Gastrointestinal Stromal Tumor,EL:2A:Imatinib(24963404, 15928335)
chr4	55144558	55144559	CT	-	exonic	PDGFRA	frameshift deletion	p.F678Lfs*10	c.2032_2033delTT		0	1	0
chr4	55144572	55144572	G	T	exonic	PDGFRA	nonsynonymous SNV	p.L682F	c.2046G>T		0	1	0	D		Gastrointestinal Stromal Tumor,EL:2A:Imatinib(24963404, 15928335)
chr4	55144586	55144586	A	G	exonic	PDGFRA	nonsynonymous SNV	p.H687R	c.2060A>G		0	1	0	N
chr4	55144619	55144619	C	A	exonic	PDGFRA	nonsynonymous SNV	p.P698Q	c.2093C>A		0	1	0	D		Gastrointestinal Stromal Tumor,EL:2A:Imatinib(24963404, 15928335)
chr4	55144631	55144631	A	T	exonic	PDGFRA	nonsynonymous SNV	p.K702M	c.2105A>T		0	1	0	N	ID=COSM3604508;OCCURENCE=1(skin)
chr4	55144645	55144645	A	G	exonic	PDGFRA	nonsynonymous SNV	p.I707V	c.2119A>G		0	1	0	N	ID=COSM6191602;OCCURENCE=1(large_intestine)
chr4	55144656	55144656	G	T	exonic	PDGFRA	nonsynonymous SNV	p.L710F	c.2130G>T		0	1	0	N
chr4	55152048	55152048	C	T	exonic	PDGFRA	nonsynonymous SNV	p.A827V	c.2480C>T	rs750553538	0	1	0	D		Gastrointestinal Stromal Tumor,EL:2A:Imatinib(24963404, 15928335)
chr4	55152071	55152071	T	A	exonic	PDGFRA	nonsynonymous SNV	p.C835S	c.2503T>A		0	1	0	N
chr4	55152077	55152077	T	C	exonic	PDGFRA	nonsynonymous SNV	p.F837L	c.2509T>C		0	1	0	D		Gastrointestinal Stromal Tumor,EL:2A:Imatinib(24963404, 15928335)
chr4	55152081	55152081	G	T	exonic	PDGFRA	nonsynonymous SNV	p.G838V	c.2513G>T		0	1	0	D	ID=COSM378406;OCCURENCE=1(lung)	Gastrointestinal Stromal Tumor,EL:2A:Imatinib(24963404, 15928335)
chr4	55152099	55152099	T	A	exonic	PDGFRA	nonsynonymous SNV	p.M844K	c.2531T>A		0	1	0	N
chr4	55152107	55152107	T	A	exonic	PDGFRA	nonsynonymous SNV	p.S847T	c.2539T>A		0	1	0	N
chr4	55152108	55152108	C	T	exonic	PDGFRA	nonsynonymous SNV	p.S847L	c.2540C>T	rs377487797	0	1	0	D	ID=COSM3604511;OCCURENCE=2(skin)	Gastrointestinal Stromal Tumor,EL:2A:Imatinib(24963404, 15928335)
chr4	55561782	55561782	T	C	exonic	KIT	nonsynonymous SNV	p.C58R	c.172T>C		0	1	0	D		Thymic Tumor,EL:2A:Sunitinib, Sorafenib(25592632, 19461405, 20571495) ; Melanoma,EL:2A:Imatinib(23775962, 18235121, 12181401, 21642685, 16098458, 15451219) ; Gastrointestinal Stromal Tumor,EL:1:Regorafenib, Imatinib, Sunitinib(18235121, 12181401, 17046465, 19282169, 25641662, 16098458, 15451219, 23177515)
chr4	55561797	55561797	T	G	exonic	KIT	nonsynonymous SNV	p.F63V	c.187T>G		0	1	0	N
chr4	55561810	55561810	C	T	exonic	KIT	nonsynonymous SNV	p.T67I	c.200C>T		0	1	0	N
chr4	55561818	55561818	A	G	exonic	KIT	nonsynonymous SNV	p.I70V	c.208A>G		0	1	0	N
chr4	55561831	55561831	C	T	exonic	KIT	nonsynonymous SNV	p.T74M	c.221C>T	rs147943899	0	1	0	N	ID=COSM6437987;OCCURENCE=1(large_intestine)
chr4	55561840	55561840	A	T	exonic	KIT	nonsynonymous SNV	p.N77I	c.230A>T		0	1	0	N
chr4	55561861	55561861	C	T	exonic	KIT	nonsynonymous SNV	p.T84M	c.251C>T	rs201872586	0	1	0	N	ID=COSM3380948;OCCURENCE=2(pancreas),1(genital_tract),1(prostate)
chr4	55561867	55561867	A	T	exonic	KIT	nonsynonymous SNV	p.K86M	c.257A>T		0	1	0	N
chr4	55561874	55561874	A	C	exonic	KIT	nonsynonymous SNV	p.E88D	c.264A>C		0	1	0	N
chr4	55561876	55561876	C	T	exonic	KIT	nonsynonymous SNV	p.A89V	c.266C>T		0	1	0	N
chr4	55592215	55592215	A	C	exonic	KIT	nonsynonymous SNV	p.K513N	c.1539A>C		0	1	0	D		Thymic Tumor,EL:2A:Sunitinib, Sorafenib(25592632, 19461405, 20571495) ; Melanoma,EL:2A:Imatinib(23775962, 18235121, 12181401, 21642685, 16098458, 15451219) ; Gastrointestinal Stromal Tumor,EL:1:Regorafenib, Imatinib, Sunitinib(18235121, 12181401, 17046465, 19282169, 25641662, 16098458, 15451219, 23177515)
chr4	55593386	55593386	C	T	exonic	KIT	stopgain	p.Q515	c.1543_1545		0	1	0
chr4	55593392	55593392	C	T	exonic	KIT	nonsynonymous SNV	p.H517Y	c.1549C>T		0	1	0	N
chr4	55593395	55593395	C	T	exonic	KIT	nonsynonymous SNV	p.P518S	c.1552C>T		0	1	0	N
chr4	55593396	55593396	C	T	exonic	KIT	nonsynonymous SNV	p.P518L	c.1553C>T	rs569408054	0	1	0	D		Thymic Tumor,EL:2A:Sunitinib, Sorafenib(25592632, 19461405, 20571495) ; Melanoma,EL:2A:Imatinib(23775962, 18235121, 12181401, 21642685, 16098458, 15451219) ; Gastrointestinal Stromal Tumor,EL:1:Regorafenib, Imatinib, Sunitinib(18235121, 12181401, 17046465, 19282169, 25641662, 16098458, 15451219, 23177515)
chr4	55593410	55593410	A	-	exonic	KIT	frameshift deletion	p.T523Lfs*4	c.1567delA		0	1	0
chr4	55593413	55593413	C	T	exonic	KIT	nonsynonymous SNV	p.P524S	c.1570C>T		0	1	0	D		Thymic Tumor,EL:2A:Sunitinib, Sorafenib(25592632, 19461405, 20571495) ; Melanoma,EL:2A:Imatinib(23775962, 18235121, 12181401, 21642685, 16098458, 15451219) ; Gastrointestinal Stromal Tumor,EL:1:Regorafenib, Imatinib, Sunitinib(18235121, 12181401, 17046465, 19282169, 25641662, 16098458, 15451219, 23177515)
chr4	55593431	55593431	G	A	exonic	KIT	nonsynonymous SNV	p.V530I	c.1588G>A	rs72550822	0	1	0	N	ID=COSM1155;OCCURENCE=1(haematopoietic_and_lymphoid_tissue)
chr4	55593466	55593466	G	C	exonic	KIT	nonsynonymous SNV	p.M541I	c.1623G>C		0	1	0	N
chr4	55593474	55593474	C	T	exonic	KIT	nonsynonymous SNV	p.T544I	c.1631C>T		0	1	0	N
chr4	55593476	55593477	CA	-	exonic	KIT	frameshift deletion	p.Y545	c.1633_1635		0	1	0
chr4	55593482	55593482	T	A	exonic	KIT	nonsynonymous SNV	p.Y547	c.1639_1641		0	1	0	D		Thymic Tumor,EL:2A:Sunitinib, Sorafenib(25592632, 19461405, 20571495) ; Melanoma,EL:2A:Imatinib(23775962, 18235121, 12181401, 21642685, 16098458, 15451219) ; Gastrointestinal Stromal Tumor,EL:1:Regorafenib, Imatinib, Sunitinib(18235121, 12181401, 17046465, 19282169, 25641662, 16098458, 15451219, 23177515)
chr4	55593483	55593483	A	T	exonic	KIT	nonsynonymous SNV	p.Y547F	c.1640A>T		0	1	0	D		Thymic Tumor,EL:2A:Sunitinib, Sorafenib(25592632, 19461405, 20571495) ; Melanoma,EL:2A:Imatinib(23775962, 18235121, 12181401, 21642685, 16098458, 15451219) ; Gastrointestinal Stromal Tumor,EL:1:Regorafenib, Imatinib, Sunitinib(18235121, 12181401, 17046465, 19282169, 25641662, 16098458, 15451219, 23177515)
chr4	55593586	55593586	C	T	exonic	KIT	nonsynonymous SNV	p.P551L	c.1652C>T		0	1	Q550-580L	D	ID=COSM33965;OCCURENCE=1(salivary_gland),1(breast),1(genital_tract),2(skin)	Thymic Tumor,EL:2A:Sunitinib, Sorafenib(25592632, 19461405, 20571495) ; Melanoma,EL:2A:Imatinib(23775962, 18235121, 12181401, 21642685, 16098458, 15451219) ; Gastrointestinal Stromal Tumor,EL:1:Regorafenib, Imatinib, Sunitinib(18235121, 12181401, 17046465, 19282169, 25641662, 16098458, 15451219, 23177515)
chr4	55593588	55593588	A	G	exonic	KIT	nonsynonymous SNV	p.M552V	c.1654A>G	rs777596975	0	1	0	D		Thymic Tumor,EL:2A:Sunitinib, Sorafenib(25592632, 19461405, 20571495) ; Melanoma,EL:2A:Imatinib(23775962, 18235121, 12181401, 21642685, 16098458, 15451219) ; Gastrointestinal Stromal Tumor,EL:1:Regorafenib, Imatinib, Sunitinib(18235121, 12181401, 17046465, 19282169, 25641662, 16098458, 15451219, 23177515)
chr4	55593600	55593600	C	T	exonic	KIT	stopgain	p.Q556	c.1666_1668		0	1	Q550-5806
chr4	55593610	55593610	T	C	exonic	KIT	nonsynonymous SNV	p.V559A	c.1676T>C	rs121913517	0	1	V559A	D	ID=COSM1255;OCCURENCE=1(haematopoietic_and_lymphoid_tissue),10(soft_tissue),9(skin),1(thymus)	Thymic Tumor,EL:2A:Sunitinib, Sorafenib(25592632, 19461405, 20571495) ; Melanoma,EL:2A:Imatinib(23775962, 18235121, 12181401, 21642685, 16098458, 15451219) ; Gastrointestinal Stromal Tumor,EL:1:Regorafenib, Imatinib, Sunitinib(18235121, 12181401, 17046465, 19282169, 25641662, 16098458, 15451219, 23177515)
chr4	55593613	55593618	ACAGTG	-	exonic	KIT	nonframeshift deletion	p.V556_E557delVE	c.1667_1672delTTGAGG		0	1	0
chr4	55593615	55593620	TGGAAG	-	exonic	KIT	nonframeshift deletion	p.E557_E558delEE	c.1669_1674delGAGGAG		0	1	0
chr4	55593634	55593634	A	G	exonic	KIT	nonsynonymous SNV	p.N567S	c.1700A>G	rs1016976398	0	1	0	D		Thymic Tumor,EL:2A:Sunitinib, Sorafenib(25592632, 19461405, 20571495) ; Melanoma,EL:2A:Imatinib(23775962, 18235121, 12181401, 21642685, 16098458, 15451219) ; Gastrointestinal Stromal Tumor,EL:1:Regorafenib, Imatinib, Sunitinib(18235121, 12181401, 17046465, 19282169, 25641662, 16098458, 15451219, 23177515)
chr4	55593639	55593639	G	A	exonic	KIT	nonsynonymous SNV	p.V569I	c.1705G>A		0	1	0	D	ID=COSM144154;OCCURENCE=1(skin),1(eye)	Thymic Tumor,EL:2A:Sunitinib, Sorafenib(25592632, 19461405, 20571495) ; Melanoma,EL:2A:Imatinib(23775962, 18235121, 12181401, 21642685, 16098458, 15451219) ; Gastrointestinal Stromal Tumor,EL:1:Regorafenib, Imatinib, Sunitinib(18235121, 12181401, 17046465, 19282169, 25641662, 16098458, 15451219, 23177515)
chr4	55593655	55593655	C	T	exonic	KIT	nonsynonymous SNV	p.T574I	c.1721C>T		0	1	Q550-580I	D	ID=COSM1287;OCCURENCE=1(haematopoietic_and_lymphoid_tissue)	Thymic Tumor,EL:2A:Sunitinib, Sorafenib(25592632, 19461405, 20571495) ; Melanoma,EL:2A:Imatinib(23775962, 18235121, 12181401, 21642685, 16098458, 15451219) ; Gastrointestinal Stromal Tumor,EL:1:Regorafenib, Imatinib, Sunitinib(18235121, 12181401, 17046465, 19282169, 25641662, 16098458, 15451219, 23177515)
chr4	55593657	55593657	C	T	exonic	KIT	stopgain	p.Q575	c.1723_1725		0	1	0
chr4	55593664	55593664	C	T	exonic	KIT	nonsynonymous SNV	p.P573L	c.1718C>T		0	1	0	D	ID=COSM33903;OCCURENCE=1(soft_tissue)	Thymic Tumor,EL:2A:Sunitinib, Sorafenib(25592632, 19461405, 20571495) ; Melanoma,EL:2A:Imatinib(23775962, 18235121, 12181401, 21642685, 16098458, 15451219) ; Gastrointestinal Stromal Tumor,EL:1:Regorafenib, Imatinib, Sunitinib(18235121, 12181401, 17046465, 19282169, 25641662, 16098458, 15451219, 23177515)
chr4	55593667	55593667	A	G	exonic	KIT	nonsynonymous SNV	p.Y578C	c.1733A>G		0	1	0	D	ID=COSM6503446;OCCURENCE=1(skin)	Thymic Tumor,EL:2A:Sunitinib, Sorafenib(25592632, 19461405, 20571495) ; Melanoma,EL:2A:Imatinib(23775962, 18235121, 12181401, 21642685, 16098458, 15451219) ; Gastrointestinal Stromal Tumor,EL:1:Regorafenib, Imatinib, Sunitinib(18235121, 12181401, 17046465, 19282169, 25641662, 16098458, 15451219, 23177515)
chr4	55593675	55593675	A	G	exonic	KIT	nonsynonymous SNV	p.K581E	c.1741A>G		0	1	0	D		Thymic Tumor,EL:2A:Sunitinib, Sorafenib(25592632, 19461405, 20571495) ; Melanoma,EL:2A:Imatinib(23775962, 18235121, 12181401, 21642685, 16098458, 15451219) ; Gastrointestinal Stromal Tumor,EL:1:Regorafenib, Imatinib, Sunitinib(18235121, 12181401, 17046465, 19282169, 25641662, 16098458, 15451219, 23177515)
chr4	55593687	55593687	C	T	exonic	KIT	nonsynonymous SNV	p.P585S	c.1753C>T		0	1	0	D	ID=COSM6437980;OCCURENCE=1(large_intestine)	Thymic Tumor,EL:2A:Sunitinib, Sorafenib(25592632, 19461405, 20571495) ; Melanoma,EL:2A:Imatinib(23775962, 18235121, 12181401, 21642685, 16098458, 15451219) ; Gastrointestinal Stromal Tumor,EL:1:Regorafenib, Imatinib, Sunitinib(18235121, 12181401, 17046465, 19282169, 25641662, 16098458, 15451219, 23177515)
chr4	55593702	55593702	A	T	exonic	KIT	nonsynonymous SNV	p.S590C	c.1768A>T		0	1	0	D		Thymic Tumor,EL:2A:Sunitinib, Sorafenib(25592632, 19461405, 20571495) ; Melanoma,EL:2A:Imatinib(23775962, 18235121, 12181401, 21642685, 16098458, 15451219) ; Gastrointestinal Stromal Tumor,EL:1:Regorafenib, Imatinib, Sunitinib(18235121, 12181401, 17046465, 19282169, 25641662, 16098458, 15451219, 23177515)
chr4	55594243	55594243	A	G	exonic	KIT	nonsynonymous SNV	p.N649S	c.1946A>G		0	1	0	N	ID=COSM6437973;OCCURENCE=1(large_intestine)
chr4	55594251	55594251	A	T	exonic	KIT	nonsynonymous SNV	p.N652Y	c.1954A>T		0	1	0	D		Thymic Tumor,EL:2A:Sunitinib, Sorafenib(25592632, 19461405, 20571495) ; Melanoma,EL:2A:Imatinib(23775962, 18235121, 12181401, 21642685, 16098458, 15451219) ; Gastrointestinal Stromal Tumor,EL:1:Regorafenib, Imatinib, Sunitinib(18235121, 12181401, 17046465, 19282169, 25641662, 16098458, 15451219, 23177515)
chr4	55594258	55594258	T	C	exonic	KIT	nonsynonymous SNV	p.V654A	c.1961T>C	rs121913523	0	1	V654A	D	ID=COSM12706;OCCURENCE=1(haematopoietic_and_lymphoid_tissue),38(soft_tissue)	Thymic Tumor,EL:2A:Sunitinib, Sorafenib(25592632, 19461405, 20571495) ; Melanoma,EL:2A:Imatinib(23775962, 18235121, 12181401, 21642685, 16098458, 15451219) ; Gastrointestinal Stromal Tumor,EL:1:Regorafenib, Imatinib, Sunitinib(18235121, 12181401, 17046465, 19282169, 25641662, 16098458, 15451219, 23177515), R2:Imatinib (16551858, 23840364, 18955458, 16954519)
chr4	55594266	55594266	C	T	exonic	KIT	nonsynonymous SNV	p.L657F	c.1969C>T		0	1	0	D		Thymic Tumor,EL:2A:Sunitinib, Sorafenib(25592632, 19461405, 20571495) ; Melanoma,EL:2A:Imatinib(23775962, 18235121, 12181401, 21642685, 16098458, 15451219) ; Gastrointestinal Stromal Tumor,EL:1:Regorafenib, Imatinib, Sunitinib(18235121, 12181401, 17046465, 19282169, 25641662, 16098458, 15451219, 23177515)
chr4	55595531	55595531	G	T	exonic	KIT	nonsynonymous SNV	p.C674F	c.2021G>T		0	1	0	N
chr4	55595566	55595566	C	T	exonic	KIT	nonsynonymous SNV	p.R686C	c.2056C>T	rs148771698	0	1	0	D	ID=COSM6437983;OCCURENCE=2(large_intestine)	Thymic Tumor,EL:2A:Sunitinib, Sorafenib(25592632, 19461405, 20571495) ; Melanoma,EL:2A:Imatinib(23775962, 18235121, 12181401, 21642685, 16098458, 15451219) ; Gastrointestinal Stromal Tumor,EL:1:Regorafenib, Imatinib, Sunitinib(18235121, 12181401, 17046465, 19282169, 25641662, 16098458, 15451219, 23177515)
chr4	55595585	55595585	C	T	exonic	KIT	nonsynonymous SNV	p.S688L	c.2063C>T	rs757733297	0	1	0	N	ID=COSM96879;OCCURENCE=1(soft_tissue),1(large_intestine)
chr4	55595588	55595588	A	G	exonic	KIT	nonsynonymous SNV	p.K693R	c.2078A>G		0	1	0	N
chr4	55595590	55595590	C	T	exonic	KIT	stopgain	p.Q694	c.2080_2082		0	1	0
chr4	55595597	55595597	A	G	exonic	KIT	nonsynonymous SNV	p.D696G	c.2087A>G		0	1	0	N
chr4	55595599	55595599	C	T	exonic	KIT	nonsynonymous SNV	p.H697Y	c.2089C>T	rs763308199	0	1	0	N	ID=COSM36053;OCCURENCE=1(haematopoietic_and_lymphoid_tissue),1(thymus)
chr4	55595600	55595600	A	G	exonic	KIT	nonsynonymous SNV	p.H697R	c.2090A>G		0	1	0	N
chr4	55595603	55595603	C	T	exonic	KIT	nonsynonymous SNV	p.A698V	c.2093C>T		0	1	0	N
chr4	55595630	55595630	T	C	exonic	KIT	nonsynonymous SNV	p.L707P	c.2120T>C		0	1	0	D		Thymic Tumor,EL:2A:Sunitinib, Sorafenib(25592632, 19461405, 20571495) ; Melanoma,EL:2A:Imatinib(23775962, 18235121, 12181401, 21642685, 16098458, 15451219) ; Gastrointestinal Stromal Tumor,EL:1:Regorafenib, Imatinib, Sunitinib(18235121, 12181401, 17046465, 19282169, 25641662, 16098458, 15451219, 23177515)
chr4	55595645	55595645	C	T	exonic	KIT	nonsynonymous SNV	p.S712F	c.2135C>T		0	1	0	D	ID=COSM4853694;OCCURENCE=1(cervix)	Thymic Tumor,EL:2A:Sunitinib, Sorafenib(25592632, 19461405, 20571495) ; Melanoma,EL:2A:Imatinib(23775962, 18235121, 12181401, 21642685, 16098458, 15451219) ; Gastrointestinal Stromal Tumor,EL:1:Regorafenib, Imatinib, Sunitinib(18235121, 12181401, 17046465, 19282169, 25641662, 16098458, 15451219, 23177515)
chr4	55597501	55597501	A	T	exonic	KIT	nonsynonymous SNV	p.S717C	c.2149A>T		0	1	0	D		Thymic Tumor,EL:2A:Sunitinib, Sorafenib(25592632, 19461405, 20571495) ; Melanoma,EL:2A:Imatinib(23775962, 18235121, 12181401, 21642685, 16098458, 15451219) ; Gastrointestinal Stromal Tumor,EL:1:Regorafenib, Imatinib, Sunitinib(18235121, 12181401, 17046465, 19282169, 25641662, 16098458, 15451219, 23177515)
chr4	55597504	55597504	A	C	exonic	KIT	nonsynonymous SNV	p.T718P	c.2152A>C		0	1	0	N
chr4	55597505	55597505	C	T	exonic	KIT	nonsynonymous SNV	p.T718I	c.2153C>T		0	1	0	N
chr4	55597510	55597510	G	A	exonic	KIT	nonsynonymous SNV	p.E720K	c.2158G>A		0	1	0	N
chr4	55597511	55597511	A	G	exonic	KIT	nonsynonymous SNV	p.E720G	c.2159A>G		0	1	0	N
chr4	55597527	55597527	A	C	exonic	KIT	nonsynonymous SNV	p.K725N	c.2175A>C		0	1	0	N
chr4	55597550	55597550	C	T	exonic	KIT	nonsynonymous SNV	p.P733L	c.2198C>T	rs992027457	0	1	0	D		Thymic Tumor,EL:2A:Sunitinib, Sorafenib(25592632, 19461405, 20571495) ; Melanoma,EL:2A:Imatinib(23775962, 18235121, 12181401, 21642685, 16098458, 15451219) ; Gastrointestinal Stromal Tumor,EL:1:Regorafenib, Imatinib, Sunitinib(18235121, 12181401, 17046465, 19282169, 25641662, 16098458, 15451219, 23177515)
chr4	55597553	55597553	C	T	exonic	KIT	nonsynonymous SNV	p.T734I	c.2201C>T		0	1	0	N
chr4	55597572	55597572	A	C	exonic	KIT	nonsynonymous SNV	p.R740S	c.2220A>C		0	1	0	N
chr4	55598045	55598045	A	C	exonic	KIT	nonsynonymous SNV	p.I744L	c.2230A>C		0	1	0	N
chr4	55598046	55598046	T	C	exonic	KIT	nonsynonymous SNV	p.I744T	c.2231T>C	rs572852980	0	1	0	D	ID=COSM19111;OCCURENCE=1(haematopoietic_and_lymphoid_tissue)	Thymic Tumor,EL:2A:Sunitinib, Sorafenib(25592632, 19461405, 20571495) ; Melanoma,EL:2A:Imatinib(23775962, 18235121, 12181401, 21642685, 16098458, 15451219) ; Gastrointestinal Stromal Tumor,EL:1:Regorafenib, Imatinib, Sunitinib(18235121, 12181401, 17046465, 19282169, 25641662, 16098458, 15451219, 23177515)
chr4	55598047	55598047	A	G	exonic	KIT	nonsynonymous SNV	p.I744M	c.2232A>G		0	1	0	D		Thymic Tumor,EL:2A:Sunitinib, Sorafenib(25592632, 19461405, 20571495) ; Melanoma,EL:2A:Imatinib(23775962, 18235121, 12181401, 21642685, 16098458, 15451219) ; Gastrointestinal Stromal Tumor,EL:1:Regorafenib, Imatinib, Sunitinib(18235121, 12181401, 17046465, 19282169, 25641662, 16098458, 15451219, 23177515)
chr4	55599332	55599332	G	T	exonic	KIT	nonsynonymous SNV	p.D820Y	c.2458G>T	rs1057519710	0	1	D820Y	D	ID=COSM12710;OCCURENCE=2(haematopoietic_and_lymphoid_tissue),2(soft_tissue),2(genital_tract),2(skin)	Thymic Tumor,EL:2A:Sunitinib, Sorafenib(25592632, 19461405, 20571495) ; Melanoma,EL:2A:Imatinib(23775962, 18235121, 12181401, 21642685, 16098458, 15451219) ; Gastrointestinal Stromal Tumor,EL:1:Regorafenib, Imatinib, Sunitinib(18235121, 12181401, 17046465, 19282169, 25641662, 16098458, 15451219, 23177515), R2:Imatinib, Sunitinib(22301675, 23840364, 25239608, 18955458)
chr4	55599333	55599333	A	C	exonic	KIT	nonsynonymous SNV	p.D816A	c.2447A>C		0	1	D820A	D	ID=COSM133670;OCCURENCE=1(soft_tissue)	Thymic Tumor,EL:2A:Sunitinib, Sorafenib(25592632, 19461405, 20571495) ; Melanoma,EL:2A:Imatinib(23775962, 18235121, 12181401, 21642685, 16098458, 15451219) ; Gastrointestinal Stromal Tumor,EL:1:Regorafenib, Imatinib, Sunitinib(18235121, 12181401, 17046465, 19282169, 25641662, 16098458, 15451219, 23177515), R2:Imatinib, Sunitinib(22301675, 23840364, 25239608, 18955458)
chr4	55599334	55599334	T	G	exonic	KIT	nonsynonymous SNV	p.D820E	c.2460T>G		0	1	D820E	N	ID=COSM19280;OCCURENCE=1(soft_tissue)
chr4	55602739	55602739	G	A	exonic	KIT	nonsynonymous SNV	p.S850N	c.2548_2549delTCinsAA		0	1	0
chr4	55602775	55602775	G	T	exonic	KIT	stopgain	p.G866	c.2596_2598		0	1	0
chr4	55946147	55946147	C	T	exonic	KDR	synonymous SNV	p.Q1344	c.4030_4032		0	1	0
chr4	55946169	55946169	C	T	exonic	KDR	nonsynonymous SNV	p.G1337D	c.4010G>A		0	1	0	N
chr4	55946205	55946205	T	C	exonic	KDR	nonsynonymous SNV	p.E1325G	c.3974A>G		0	1	0	D
chr4	55946217	55946217	C	A	exonic	KDR	nonsynonymous SNV	p.S1321I	c.3962G>T		0	1	0	D
chr4	55946232	55946232	G	C	exonic	KDR	nonsynonymous SNV	p.T1316S	c.3947C>G		0	1	0	D
chr4	55946233	55946233	T	G	exonic	KDR	nonsynonymous SNV	p.T1316P	c.3946A>C		0	1	0	D	ID=COSM5041560;OCCURENCE=1(liver)
chr4	55946235	55946235	T	C	exonic	KDR	nonsynonymous SNV	p.D1315G	c.3944A>G		0	1	0	N	ID=COSM4909535;OCCURENCE=1(liver)
chr4	55946251	55946251	G	A	exonic	KDR	nonsynonymous SNV	p.H1310Y	c.3928C>T		0	1	0	D	ID=COSM6006366;OCCURENCE=1(NS)
chr4	55953813	55953813	C	T	exonic	KDR	nonsynonymous SNV	p.C1208Y	c.3623G>A		0	1	0	D	ID=COSM6437964;OCCURENCE=1(large_intestine)
chr4	55953823	55953823	C	T	exonic	KDR	nonsynonymous SNV	p.E1205K	c.3613G>A		0	1	0	D	ID=COSM384448;OCCURENCE=1(lung)
chr4	55953829	55953829	C	T	exonic	KDR	nonsynonymous SNV	p.E1203K	c.3607G>A		0	1	0	D	ID=COSM4992127;OCCURENCE=1(skin),1(large_intestine)
chr4	55953832	55953832	T	C	exonic	KDR	nonsynonymous SNV	p.M1202V	c.3604A>G	rs145493938	0	1	0	D
chr4	55953833	55953833	T	-	exonic	KDR	stopgain	p.C1201	c.3601_3603		0	1	0
chr4	55953834	55953834	C	T	exonic	KDR	nonsynonymous SNV	p.C1201Y	c.3602G>A		0	1	0	D	ID=COSM6437965;OCCURENCE=1(large_intestine)
chr4	55953855	55953855	A	T	exonic	KDR	nonsynonymous SNV	p.L1194Q	c.3581T>A		0	1	0	N
chr4	55953865	55953865	C	T	exonic	KDR	nonsynonymous SNV	p.G1191R	c.3571G>A		0	1	0	D
chr4	55953871	55953871	C	T	exonic	KDR	nonsynonymous SNV	p.D1189N	c.3565G>A		0	1	0	D	ID=COSM3604536;OCCURENCE=1(skin),1(lung)
chr4	55953878	55953878	G	-	exonic	KDR	frameshift deletion	p.E1187Kfs*48	c.3559delG		0	1	0
chr4	55953892	55953892	C	T	exonic	KDR	nonsynonymous SNV	p.E1182K	c.3544G>A		0	1	0	N
chr4	55953915	55953915	T	C	exonic	KDR	nonsynonymous SNV	p.D1174G	c.3521A>G		0	1	0	D
chr4	55953920	55953920	C	-	exonic	KDR	frameshift deletion	p.D1174Tfs*11	c.3516delC		0	1	0
chr4	55953923	55953923	A	C	exonic	KDR	nonsynonymous SNV	p.D1171E	c.3513T>G		0	1	0	D
chr4	55955109	55955109	C	T	exonic	KDR	nonsynonymous SNV	p.E1146K	c.3436G>A		0	1	0	N
chr4	55955134	55955134	C	A	exonic	KDR	nonsynonymous SNV	p.Q1137H	c.3411G>T		0	1	0	N
chr4	55960989	55960989	C	T	exonic	KDR	nonsynonymous SNV	p.S984N	c.2951G>A		0	1	0	N
chr4	55961001	55961002	GG	-	exonic	KDR	frameshift deletion	p.K981Vfs*4	c.2940_2941delGA		0	1	0
chr4	55961028	55961028	C	T	exonic	KDR	nonsynonymous SNV	p.S971N	c.2912G>A		0	1	0	D
chr4	55961037	55961037	C	T	exonic	KDR	nonsynonymous SNV	p.S968N	c.2903G>A	rs748708773	0	1	0	D
chr4	55961044	55961044	T	C	exonic	KDR	nonsynonymous SNV	p.I966V	c.2896A>G		0	1	0	N
chr4	55961046	55961046	C	T	exonic	KDR	nonsynonymous SNV	p.S965N	c.2894G>A	rs774666756	0	1	0	N
chr4	55961055	55961055	C	T	exonic	KDR	nonsynonymous SNV	p.R962H	c.2885G>A		0	1	0	D	ID=COSM327103;OCCURENCE=1(haematopoietic_and_lymphoid_tissue)
chr4	55961058	55961058	C	T	exonic	KDR	nonsynonymous SNV	p.R961Q	c.2882G>A	rs199904772	0	1	0	N
chr4	55961079	55961079	C	-	exonic	KDR	frameshift deletion	p.A954Efs*6	c.2861delC		0	1	0
chr4	55961080	55961080	C	T	exonic	KDR	nonsynonymous SNV	p.A954T	c.2860G>A	rs757083292	0	1	0	N
chr4	55961086	55961086	C	T	exonic	KDR	nonsynonymous SNV	p.V952I	c.2854G>A	rs13129474	0	1	0	N	ID=COSM5760600;OCCURENCE=1(pancreas)
chr4	55961100	55961100	T	A	exonic	KDR	nonsynonymous SNV	p.Q947L	c.2840A>T		0	1	0	N
chr4	55972970	55972970	C	T	exonic	KDR	nonsynonymous SNV	p.V474I	c.1420G>A		0	1	0	N
chr4	55979630	55979630	C	T	exonic	KDR	nonsynonymous SNV	p.V273I	c.817G>A		0	1	0	N
chr4	55979648	55979648	C	-	exonic	KDR	frameshift deletion	p.H267Ifs*7	c.799delC		0	1	0
chr4	55980355	55980355	A	T	exonic	KDR	nonsynonymous SNV	p.C246S	c.736T>A		0	1	0	D
chr4	55980382	55980382	A	T	exonic	KDR	nonsynonymous SNV	p.S237T	c.709T>A		0	1	0	N
chr4	55980424	55980424	G	-	exonic	KDR	frameshift deletion	p.I223Ffs*6	c.667delA		0	1	0
chr4	153245480	153245480	C	T	exonic	FBXW7	nonsynonymous SNV	p.G571R	c.1711G>A		1	0	0	N
chr4	153245486	153245486	C	T	exonic	FBXW7	nonsynonymous SNV	p.E569K	c.1705G>A		1	0	0	N	ID=COSM6197905;OCCURENCE=1(large_intestine)
chr4	153245487	153245487	G	-	exonic	FBXW7	frameshift deletion	p.E569Rfs*9	c.1705delG		1	0	0
chr4	153245488	153245488	A	G	exonic	FBXW7	nonsynonymous SNV	p.V568A	c.1703T>C		1	0	0	N
chr4	153245490	153245490	A	C	exonic	FBXW7	nonsynonymous SNV	p.D567E	c.1701T>G		1	0	0	D
chr4	153245492	153245492	C	T	exonic	FBXW7	nonsynonymous SNV	p.D567N	c.1699G>A		1	0	0	D	ID=COSM6197892;OCCURENCE=1(large_intestine)
chr4	153245494	153245494	G	-	exonic	FBXW7	frameshift deletion	p.D567Mfs*11	c.1699delG		1	0	0
chr4	153245498	153245498	C	T	exonic	FBXW7	nonsynonymous SNV	p.V565I	c.1693G>A		1	0	0	N
chr4	153245522	153245522	G	-	exonic	FBXW7	frameshift deletion	p.G557Dfs*21	c.1670delG		1	0	0
chr4	153245524	153245524	C	T	exonic	FBXW7	nonsynonymous SNV	p.S556N	c.1667G>A		1	0	0	D	ID=COSM1645484,COSM1645485,COSM1645483,COSM1645486,COSM1645482;OCCURENCE=1(large_intestine)
chr4	153245527	153245527	A	T	exonic	FBXW7	nonsynonymous SNV	p.V555E	c.1664T>A		1	0	0	D
chr4	153245528	153245528	C	T	exonic	FBXW7	nonsynonymous SNV	p.V555M	c.1663G>A		1	0	0	D
chr4	153245532	153245532	A	T	exonic	FBXW7	nonsynonymous SNV	p.H553Q	c.1659T>A		1	0	0	N
chr4	153245536	153245536	A	T	exonic	FBXW7	nonsynonymous SNV	p.I552N	c.1655T>A		1	0	0	N
chr4	153247292	153247292	C	T	exonic	FBXW7	nonsynonymous SNV	p.V504I	c.1510G>A		1	0	0	D	ID=COSM27055;OCCURENCE=1(stomach),1(large_intestine)
chr4	153247305	153247305	G	-	exonic	FBXW7	frameshift deletion	p.G499	c.1495_1497		1	0	0
chr4	153247306	153247306	C	T	exonic	FBXW7	nonsynonymous SNV	p.G499D	c.1496G>A		1	0	0	D
chr4	153247308	153247308	C	G	exonic	FBXW7	nonsynonymous SNV	p.M418I	c.1254G>C		1	0	0	N
chr4	153247324	153247324	C	T	exonic	FBXW7	nonsynonymous SNV	p.C493Y	c.1478G>A		1	0	0	D
chr4	153247325	153247325	A	T	exonic	FBXW7	nonsynonymous SNV	p.C493S	c.1477T>A		1	0	0	D
chr4	153247342	153247342	T	G	exonic	FBXW7	nonsynonymous SNV	p.D487A	c.1460A>C		1	0	0	D
chr4	153247344	153247344	C	A	exonic	FBXW7	nonsynonymous SNV	p.W486C	c.1458G>T		1	0	0	D
chr4	153247350	153247350	G	A	exonic	FBXW7	nonsynonymous SNV	p.R484H	c.1450_1452delAGGinsCAT		1	0	0		ID=COSM123134,COSM123135,COSM123132,COSM123133;OCCURENCE=1(upper_aerodigestive_tract),1(endometrium)
chr4	153247355	153247355	G	A	exonic	FBXW7	nonsynonymous SNV	p.L483F	c.1447C>T		1	0	0	N
chr4	153247357	153247357	G	T	exonic	FBXW7	nonsynonymous SNV	p.T482N	c.1445C>A		1	0	0	D
chr4	153247361	153247361	C	T	exonic	FBXW7	nonsynonymous SNV	p.A481T	c.1441G>A		1	0	0	N
chr4	153247366	153247366	C	T	exonic	FBXW7	nonsynonymous SNV	p.R479Q	c.1436G>A	rs866987936	1	0	R479Q	N	ID=COSM447499,COSM6847976,COSM94297,COSM1154291,COSM447498,COSM22974;OCCURENCE=1(pleura),1(breast),4(stomach),17(haematopoietic_and_lymphoid_tissue),1(kidney),1(pancreas),3(oesophagus),1(skin),5(lung),1(cervix),2(upper_aerodigestive_tract),21(large_intestine),1(biliary_tract),11(endometrium)
chr4	153247373	153247373	C	T	exonic	FBXW7	nonsynonymous SNV	p.G477S	c.1429G>A		1	0	0	D	ID=COSM327078,COSM1645537,COSM327080,COSM327079,COSM327081;OCCURENCE=2(haematopoietic_and_lymphoid_tissue),4(large_intestine)
chr4	153247382	153247382	C	T	exonic	FBXW7	nonsynonymous SNV	p.V474I	c.1420G>A		1	0	0	N
chr4	153249381	153249381	C	T	exonic	FBXW7	nonsynonymous SNV	p.C466Y	c.1397G>A		1	0	0	D	ID=COSM6052625,COSM6052624,COSM6052628,COSM6052626,COSM6052627;OCCURENCE=1(large_intestine)
chr4	153249382	153249382	A	T	exonic	FBXW7	nonsynonymous SNV	p.C466S	c.1396T>A		1	0	0	N
chr4	153249404	153249404	T	A	exonic	FBXW7	synonymous SNV	p.Y458	c.1372_1374		1	0	0
chr4	153249423	153249423	T	A	exonic	FBXW7	nonsynonymous SNV	p.E452V	c.1355A>T		1	0	0	N
chr4	153249427	153249427	C	T	exonic	FBXW7	nonsynonymous SNV	p.G451R	c.1351G>A		1	0	0	N
chr4	153249442	153249442	A	T	exonic	FBXW7	nonsynonymous SNV	p.W446R	c.1336T>A		1	0	0	D
chr4	153249445	153249445	C	T	exonic	FBXW7	nonsynonymous SNV	p.V445M	c.1333G>A		1	0	0	N
chr4	153249453	153249453	G	A	exonic	FBXW7	nonsynonymous SNV	p.T442I	c.1325C>T		1	0	0	D
chr4	153249456	153249456	C	T	exonic	FBXW7	nonsynonymous SNV	p.R441Q	c.1322G>A		1	0	R441Q	N	ID=COSM1052094,COSM1052093,COSM1154294,COSM1052091,COSM1052092;OCCURENCE=2(haematopoietic_and_lymphoid_tissue),1(stomach),1(endometrium)
chr4	153249471	153249471	C	T	exonic	FBXW7	nonsynonymous SNV	p.S436N	c.1307G>A		1	0	0	D	ID=COSM6197891;OCCURENCE=1(large_intestine)
chr4	153249485	153249485	G	C	exonic	FBXW7	nonsynonymous SNV	p.D431E	c.1293C>G		1	0	0	N
chr4	153249491	153249491	A	-	exonic	FBXW7	frameshift deletion	p.M429	c.1285_1287		1	0	0
chr4	153250882	153250882	C	T	exonic	FBXW7	nonsynonymous SNV	p.R393Q	c.1178G>A		1	0	R393Q	N	ID=COSM1427803,COSM1427802,COSM1427804,COSM1427805,COSM1427801;OCCURENCE=1(pancreas),1(large_intestine)
chr4	153250889	153250889	C	T	exonic	FBXW7	nonsynonymous SNV	p.G391S	c.1171G>A		1	0	0	N
chr4	153250890	153250890	A	C	exonic	FBXW7	nonsynonymous SNV	p.C310W	c.930T>G		1	0	0	N
chr4	153250894	153250894	A	T	exonic	FBXW7	nonsynonymous SNV	p.F389Y	c.1166T>A		1	0	0	N
chr4	153250897	153250897	T	C	exonic	FBXW7	nonsynonymous SNV	p.Q388R	c.1163A>G		1	0	0	N
chr4	153250902	153250902	G	C	exonic	FBXW7	nonsynonymous SNV	p.C386W	c.1158C>G		1	0	0	D	ID=COSM27400;OCCURENCE=1(large_intestine)
chr4	153250916	153250918	CAT	-	exonic	FBXW7	nonframeshift deletion	p.H382delH	c.1144_1146delCAT		1	0	0
chr4	153250922	153250922	C	T	exonic	FBXW7	nonsynonymous SNV	p.D380N	c.1138G>A		1	0	0	N	ID=COSM6197887;OCCURENCE=1(large_intestine)
chr4	153250936	153250936	A	T	exonic	FBXW7	nonsynonymous SNV	p.V375E	c.1124T>A		1	0	0	N
chr4	153258982	153258982	C	T	exonic	FBXW7	nonsynonymous SNV	p.R278Q	c.833G>A		1	0	0	N	ID=COSM5481865,COSM5481866,COSM5481867,COSM5481869,COSM5481868;OCCURENCE=1(large_intestine)
chr4	153259022	153259022	C	T	exonic	FBXW7	nonsynonymous SNV	p.V265I	c.793G>A		1	0	0	N
chr4	153259025	153259025	G	C	exonic	FBXW7	nonsynonymous SNV	p.Q264E	c.790C>G		1	0	0	N
chr4	153259027	153259027	G	T	exonic	FBXW7	nonsynonymous SNV	p.T263K	c.788C>A		1	0	0	N
chr4	153259039	153259039	C	T	exonic	FBXW7	nonsynonymous SNV	p.S259N	c.776G>A		1	0	0	N
chr4	153259055	153259055	C	T	exonic	FBXW7	nonsynonymous SNV	p.D254N	c.760G>A		1	0	0	N
chr4	153259073	153259073	C	T	exonic	FBXW7	nonsynonymous SNV	p.E248K	c.742G>A		1	0	0	N
chr4	153259081	153259081	C	T	exonic	FBXW7	nonsynonymous SNV	p.S245N	c.734G>A		1	0	0	N
chr5	112173917	112173917	C	T	exonic	APC	stopgain	p.R876	c.2626_2628	rs121913333	1	0	0		ID=COSM18852;OCCURENCE=1(breast),1(kidney),1(oesophagus),1(lung),147(large_intestine),3(small_intestine),1(endometrium)
chr5	112173920	112173920	G	T	exonic	APC	nonsynonymous SNV	p.G877C	c.2629G>T		1	0	0	D
chr5	112173944	112173946	AGC	-	exonic	APC	nonframeshift deletion	p.A885delA	c.2653_2655delGCC		1	0	0
chr5	112173954	112173954	C	T	exonic	APC	nonsynonymous SNV	p.A888V	c.2663C>T		1	0	0	D
chr5	112173966	112173966	A	G	exonic	APC	nonsynonymous SNV	p.E892G	c.2675A>G		1	0	0	D
chr5	112173971	112173971	G	C	exonic	APC	nonsynonymous SNV	p.V894L	c.2680G>C		1	0	0	D
chr5	112173975	112173975	C	T	exonic	APC	nonsynonymous SNV	p.S895L	c.2684C>T		1	0	0	D
chr5	112173977	112173977	G	C	exonic	APC	nonsynonymous SNV	p.A896P	c.2686G>C		1	0	0	D
chr5	112173986	112173987	AC	-	exonic	APC	frameshift deletion	p.T899Lfs*12	c.2695_2696delAC		1	0	0
chr5	112173992	112173992	C	T	exonic	APC	stopgain	p.Q901	c.2701_2703		1	0	0		ID=COSM201302;OCCURENCE=1(large_intestine)
chr5	112174014	112174014	C	T	exonic	APC	nonsynonymous SNV	p.S908F	c.2723C>T		1	0	0	D
chr5	112174017	112174017	C	T	exonic	APC	nonsynonymous SNV	p.T909I	c.2726C>T		1	0	0	D
chr5	112174022	112174022	G	T	exonic	APC	stopgain	p.E911	c.2731_2733	rs398123119	1	0	0		ID=COSM235665;OCCURENCE=3(large_intestine)
chr5	112174037	112174037	A	G	exonic	APC	nonsynonymous SNV	p.T916A	c.2746A>G		1	0	0	N
chr5	112174044	112174044	A	T	exonic	APC	nonsynonymous SNV	p.E918V	c.2753A>T		1	0	0	D
chr5	112174047	112174048	GA	-	exonic	APC	frameshift deletion	p.R919Kfs*4	c.2756_2757delGA		1	0	0
chr5	112174631	112174631	C	T	exonic	APC	stopgain	p.R1114	c.3340_3342	rs121913331	1	0	0		ID=COSM13125;OCCURENCE=1(ovary),3(NS),2(stomach),1(kidney),1(skin),85(large_intestine),1(central_nervous_system),1(endometrium)
chr5	112174637	112174637	G	T	exonic	APC	nonsynonymous SNV	p.G1116C	c.3346G>T		1	0	0	D
chr5	112174646	112174646	C	A	exonic	APC	nonsynonymous SNV	p.H1119N	c.3355C>A		1	0	0	D	ID=COSM6475505;OCCURENCE=1(large_intestine)
chr5	112174656	112174656	A	T	exonic	APC	nonsynonymous SNV	p.N1122I	c.3365A>T		1	0	0	D
chr5	112174658	112174658	C	T	exonic	APC	stopgain	p.Q1123	c.3367_3369		1	0	0		ID=COSM1432255;OCCURENCE=1(lung),2(large_intestine)
chr5	112174661	112174661	A	-	exonic	APC	frameshift deletion	p.N1124	c.3370_3372		1	0	0
chr5	112174680	112174680	G	T	exonic	APC	nonsynonymous SNV	p.C1130F	c.3389G>T		1	0	0	D
chr5	112174682	112174682	C	T	exonic	APC	stopgain	p.Q1131	c.3391_3393	rs878853438	1	0	0		ID=COSM13868;OCCURENCE=1(stomach),5(large_intestine)
chr5	112174695	112174695	A	T	exonic	APC	nonsynonymous SNV	p.Y1135F	c.3404A>T		1	0	0	D
chr5	112174698	112174698	A	C	exonic	APC	nonsynonymous SNV	p.E1136A	c.3407A>C	rs878853439	1	0	0	N
chr5	112174707	112174707	A	G	exonic	APC	nonsynonymous SNV	p.K1139R	c.3416A>G		1	0	0	N
chr5	112174709	112174709	C	T	exonic	APC	nonsynonymous SNV	p.P1140S	c.3418C>T		1	0	0	D
chr5	112174727	112174727	C	T	exonic	APC	nonsynonymous SNV	p.R1146C	c.3436C>T	rs202168805	1	0	0	N
chr5	112174748	112174748	C	T	exonic	APC	nonsynonymous SNV	p.H1153Y	c.3457C>T		1	0	0	D
chr5	112175069	112175069	C	T	exonic	APC	stopgain	p.Q1260	c.3778_3780		1	0	0		ID=COSM256144;OCCURENCE=3(large_intestine)
chr5	112175071	112175071	G	T	exonic	APC	nonsynonymous SNV	p.Q1260H	c.3780G>T		1	0	0	D
chr5	112175075	112175075	T	A	exonic	APC	nonsynonymous SNV	p.Y1262N	c.3784T>A		1	0	0	D
chr5	112175075	112175075	T	-	exonic	APC	frameshift deletion	p.Y1262Ifs*3	c.3784delT		1	0	0
chr5	112175081	112175081	G	A	exonic	APC	nonsynonymous SNV	p.V1264I	c.3790G>A		1	0	0	D	ID=COSM6196770;OCCURENCE=1(large_intestine)
chr5	112175082	112175082	T	C	exonic	APC	nonsynonymous SNV	p.V1264A	c.3791T>C		1	0	0	D
chr5	112175088	112175088	A	G	exonic	APC	nonsynonymous SNV	p.D1266G	c.3797A>G		1	0	0	D	ID=COSM249539;OCCURENCE=1(kidney)
chr5	112175093	112175093	C	T	exonic	APC	nonsynonymous SNV	p.P1268S	c.3802C>T		1	0	0	D
chr5	112175094	112175094	C	A	exonic	APC	nonsynonymous SNV	p.P1268Q	c.3803C>A		1	0	0	D
chr5	112175105	112175105	C	A	exonic	APC	nonsynonymous SNV	p.S1272	c.3814_3816		1	0	0
chr5	112175116	112175116	T	G	exonic	APC	nonsynonymous SNV	p.S1275R	c.3825T>G		1	0	0	D
chr5	112175123	112175123	T	A	exonic	APC	nonsynonymous SNV	p.S1278T	c.3832T>A		1	0	0	D
chr5	112175127	112175127	C	G	exonic	APC	nonsynonymous SNV	p.S1279C	c.3836C>G		1	0	0	D
chr5	112175127	112175127	C	A	exonic	APC	nonsynonymous SNV	p.S1279Y	c.3836C>A		1	0	0	D
chr5	112175130	112175130	T	C	exonic	APC	nonsynonymous SNV	p.L1280S	c.3839T>C		1	0	0	D
chr5	112175135	112175135	T	C	exonic	APC	nonsynonymous SNV	p.S1282P	c.3844T>C		1	0	0	D
chr5	112175141	112175141	G	-	exonic	APC	frameshift deletion	p.E1284Kfs*4	c.3850delG		1	0	0
chr5	112175147	112175147	G	A	exonic	APC	nonsynonymous SNV	p.E1286K	c.3856G>A		1	0	0	D
chr5	112175147	112175147	G	T	exonic	APC	stopgain	p.E1286	c.3856_3858		1	0	0		ID=COSM18772;OCCURENCE=21(large_intestine)
chr5	112175162	112175162	C	A	exonic	APC	nonsynonymous SNV	p.Q1291K	c.3871C>A		1	0	0	N
chr5	112175174	112175174	G	T	exonic	APC	stopgain	p.E1295	c.3883_3885		1	0	0		ID=COSM18961;OCCURENCE=16(large_intestine),1(small_intestine)
chr5	112175175	112175175	A	G	exonic	APC	nonsynonymous SNV	p.E1295G	c.3884A>G		1	0	0	N
chr5	112175219	112175220	AA	-	exonic	APC	frameshift deletion	p.K1310	c.3928_3930		1	0	0		ID=COSM18755;OCCURENCE=4(large_intestine)
chr5	112175220	112175220	A	T	exonic	APC	nonsynonymous SNV	p.K1310M	c.3929A>T		1	0	0	N
chr5	112175229	112175229	C	T	exonic	APC	nonsynonymous SNV	p.T1313I	c.3938C>T	rs1032236993	1	0	0	N
chr5	112175238	112175238	C	A	exonic	APC	nonsynonymous SNV	p.A1316D	c.3947C>A		1	0	0	N
chr5	112175240	112175240	G	T	exonic	APC	stopgain	p.E1317	c.3949_3951		1	0	0		ID=COSM19253;OCCURENCE=1(stomach),7(large_intestine)
chr5	112175245	112175245	C	-	exonic	APC	frameshift deletion	p.P1319Lfs*2	c.3954delT		1	0	0
chr5	112175255	112175255	G	T	exonic	APC	stopgain	p.E1322	c.3964_3966		1	0	0		ID=COSM18702;OCCURENCE=27(large_intestine)
chr5	112175277	112175277	A	C	exonic	APC	nonsynonymous SNV	p.H1329P	c.3986A>C		1	0	0	N
chr5	112175286	112175286	C	A	exonic	APC	nonsynonymous SNV	p.T1332N	c.3995C>A		1	0	0	D
chr5	112175296	112175296	C	-	exonic	APC	frameshift deletion	p.S1335Rfs*80	c.4005delC		1	0	0
chr5	112175307	112175307	G	A	exonic	APC	nonsynonymous SNV	p.G1339D	c.4016G>A	rs781621926	1	0	0	N	ID=COSM143914;OCCURENCE=1(biliary_tract)
chr5	112175364	112175364	C	T	exonic	APC	nonsynonymous SNV	p.A1358V	c.4073C>T	rs730881249	1	0	0	D	ID=COSM6168525;OCCURENCE=1(lung)
chr5	112175372	112175372	C	T	exonic	APC	nonsynonymous SNV	p.P1361S	c.4081C>T		1	0	0	D	ID=COSM3607576;OCCURENCE=2(skin),1(large_intestine)
chr5	112175390	112175390	C	T	exonic	APC	stopgain	p.Q1367	c.4099_4101	rs121913328	1	0	0		ID=COSM13121;OCCURENCE=60(large_intestine)
chr5	112175396	112175396	C	T	exonic	APC	nonsynonymous SNV	p.P1369S	c.4105C>T		1	0	0	D
chr5	112175406	112175406	C	T	exonic	APC	nonsynonymous SNV	p.P1372L	c.4115C>T		1	0	0	D
chr5	112175408	112175408	C	T	exonic	APC	nonsynonymous SNV	p.P1373S	c.4117C>T		1	0	0	N	ID=COSM27988;OCCURENCE=1(urinary_tract)
chr5	112175409	112175409	C	T	exonic	APC	nonsynonymous SNV	p.P1373L	c.4118C>T		1	0	0	D	ID=COSM5981990;OCCURENCE=2(large_intestine)
chr5	112175418	112175418	A	T	exonic	APC	nonsynonymous SNV	p.Y1376F	c.4127A>T		1	0	0	D
chr5	112175418	112175418	A	-	exonic	APC	frameshift deletion	p.Y1376Lfs*39	c.4127delA		1	0	0
chr5	112175420	112175420	G	A	exonic	APC	nonsynonymous SNV	p.V1377I	c.4129G>A	rs895463163	1	0	0	N
chr5	112175423	112175423	C	T	exonic	APC	stopgain	p.Q1378	c.4132_4134	rs121913329	1	0	0		ID=COSM18862;OCCURENCE=5(stomach),1(kidney),61(large_intestine),1(small_intestine)
chr5	112175463	112175463	G	A	exonic	APC	nonsynonymous SNV	p.S1391N	c.4172G>A		1	0	0	D
chr5	112175465	112175465	T	C	exonic	APC	nonsynonymous SNV	p.S1392P	c.4174T>C		1	0	0	D
chr5	112175469	112175469	T	C	exonic	APC	nonsynonymous SNV	p.L1393P	c.4178T>C		1	0	0	D	ID=COSM19281;OCCURENCE=1(large_intestine)
chr5	112175475	112175475	G	A	exonic	APC	nonsynonymous SNV	p.S1395N	c.4184G>A		1	0	0	D
chr5	112175476	112175476	T	G	exonic	APC	nonsynonymous SNV	p.S1395R	c.4185T>G		1	0	0	D
chr5	112175489	112175489	C	A	exonic	APC	nonsynonymous SNV	p.S1400	c.4198_4200		1	0	0
chr5	112175498	112175498	A	T	exonic	APC	nonsynonymous SNV	p.S1403C	c.4207A>T		1	0	0	D
chr5	112175504	112175504	G	A	exonic	APC	nonsynonymous SNV	p.V1405I	c.4213G>A	rs761966904	1	0	0	N
chr5	112175505	112175505	T	C	exonic	APC	nonsynonymous SNV	p.V1405A	c.4214T>C		1	0	0	D
chr5	112175525	112175525	G	A	exonic	APC	nonsynonymous SNV	p.G1412R	c.4234G>A		1	0	0	D
chr5	112175530	112175530	G	C	exonic	APC	nonsynonymous SNV	p.M1413I	c.4239G>C		1	0	0	D
chr5	112175534	112175534	A	G	exonic	APC	nonsynonymous SNV	p.S1415G	c.4243A>G		1	0	0	D
chr5	112175537	112175537	G	A	exonic	APC	nonsynonymous SNV	p.G1416S	c.4246G>A		1	0	0	D	ID=COSM5990186;OCCURENCE=1(large_intestine)
chr5	112175558	112175558	C	T	exonic	APC	nonsynonymous SNV	p.L1423F	c.4267C>T		1	0	0	D	ID=COSM6196801;OCCURENCE=1(large_intestine)
chr5	112175562	112175562	C	T	exonic	APC	nonsynonymous SNV	p.P1424L	c.4271C>T		1	0	0	D
chr5	112175562	112175562	C	A	exonic	APC	nonsynonymous SNV	p.P1424Q	c.4271C>A		1	0	0	D
chr5	112175576	112175576	C	G	exonic	APC	nonsynonymous SNV	p.Q1429E	c.4285C>G		1	0	0	D
chr5	112175588	112175588	C	A	exonic	APC	nonsynonymous SNV	p.P1433T	c.4297C>A		1	0	0	D
chr5	112175597	112175597	A	G	exonic	APC	nonsynonymous SNV	p.S1436G	c.4306A>G		1	0	0	D
chr5	112175606	112175606	C	T	exonic	APC	nonsynonymous SNV	p.P1439S	c.4315C>T		1	0	0	D	ID=COSM6475570;OCCURENCE=1(large_intestine)
chr5	112175610	112175610	C	T	exonic	APC	nonsynonymous SNV	p.P1440L	c.4319C>T		1	0	0	D	ID=COSM6196787;OCCURENCE=1(large_intestine)
chr5	112175612	112175612	C	T	exonic	APC	nonsynonymous SNV	p.P1441S	c.4321C>T		1	0	0	D
chr5	112175634	112175634	C	T	exonic	APC	nonsynonymous SNV	p.T1448I	c.4343C>T	rs907886109	1	0	0	N	ID=COSM6196795;OCCURENCE=1(large_intestine)
chr5	112175639	112175639	C	T	exonic	APC	stopgain	p.R1450	c.4348_4350	rs121913332	1	0	0		ID=COSM13127;OCCURENCE=2(NS),15(stomach),3(soft_tissue),3(pancreas),1(oesophagus),2(adrenal_gland),1(prostate),1(lung),259(large_intestine),7(small_intestine),2(endometrium)
chr5	112175663	112175663	C	T	exonic	APC	nonsynonymous SNV	p.P1458S	c.4372C>T	rs143796828	1	0	0	N
chr5	112175672	112175672	G	A	exonic	APC	nonsynonymous SNV	p.E1461K	c.4381G>A		1	0	0	D
chr5	112175676	112175676	A	-	exonic	APC	frameshift deletion	p.K1462Rfs*11	c.4385delA		1	0	0		ID=COSM4166208;OCCURENCE=1(large_intestine)
chr5	112175679	112175679	G	A	exonic	APC	nonsynonymous SNV	p.R1463K	c.4388G>A		1	0	0	D
chr5	112175681	112175681	G	A	exonic	APC	nonsynonymous SNV	p.E1464K	c.4390G>A		1	0	0	D	ID=COSM27380;OCCURENCE=1(small_intestine)
chr5	112175684	112175685	AG	-	exonic	APC	frameshift deletion	p.S1465Wfs*3	c.4393_4394delAG		1	0	0		ID=COSM13864;OCCURENCE=1(salivary_gland),13(stomach),1(pancreas),1(prostate),33(large_intestine),3(small_intestine)
chr5	112175705	112175705	G	A	exonic	APC	nonsynonymous SNV	p.V1472I	c.4414G>A	rs878853445	1	0	0	N	ID=COSM18928;OCCURENCE=1(central_nervous_system)
chr5	112175724	112175724	G	A	exonic	APC	nonsynonymous SNV	p.R1478K	c.4433G>A		1	0	0	D
chr5	112175730	112175730	A	T	exonic	APC	nonsynonymous SNV	p.Q1480L	c.4439A>T		1	0	0	D
chr5	112175748	112175748	A	T	exonic	APC	nonsynonymous SNV	p.D1486V	c.4457A>T		1	0	0	D
chr5	112175759	112175759	C	T	exonic	APC	nonsynonymous SNV	p.H1490Y	c.4468C>T		1	0	0	N	ID=COSM27995;OCCURENCE=1(urinary_tract),1(skin)
chr5	112175763	112175763	T	C	exonic	APC	nonsynonymous SNV	p.F1491S	c.4472T>C		1	0	0	D
chr5	112175781	112175781	C	T	exonic	APC	nonsynonymous SNV	p.P1497L	c.4490C>T		1	0	0	D	ID=COSM6475589;OCCURENCE=1(large_intestine)
chr5	112175783	112175783	G	T	exonic	APC	nonsynonymous SNV	p.D1498Y	c.4492G>T		1	0	0	D
chr5	112175798	112175798	C	G	exonic	APC	nonsynonymous SNV	p.S1503	c.4507_4509		1	0	0
chr5	112175802	112175802	C	T	exonic	APC	nonsynonymous SNV	p.S1504F	c.4511C>T		1	0	0	D	ID=COSM5990840;OCCURENCE=1(skin)
chr5	112175867	112175885	CCTCCAGTTCAGGAAAATG	-	exonic	APC	frameshift deletion	p.P1526	c.4576_4578		1	0	0
chr5	112175870	112175870	C	T	exonic	APC	nonsynonymous SNV	p.P1527S	c.4579C>T		1	0	0	D
chr5	112175888	112175888	A	T	exonic	APC	nonsynonymous SNV	p.N1533Y	c.4597A>T		1	0	0	D
chr5	112175897	112175897	G	A	exonic	APC	nonsynonymous SNV	p.E1536K	c.4606G>A		1	0	0	D
chr5	112175903	112175903	G	A	exonic	APC	nonsynonymous SNV	p.E1538K	c.4612G>A		1	0	0	D
chr5	112175906	112175906	T	C	exonic	APC	nonsynonymous SNV	p.S1539P	c.4615T>C		1	0	0	N
chr5	112175931	112175931	A	G	exonic	APC	nonsynonymous SNV	p.E1547G	c.4640A>G	rs786201876	1	0	0	D
chr5	112175942	112175942	A	G	exonic	APC	nonsynonymous SNV	p.K1551E	c.4651A>G		1	0	0	D
chr5	112175948	112175948	G	A	exonic	APC	nonsynonymous SNV	p.A1553T	c.4657G>A		1	0	0	D	ID=COSM6196799;OCCURENCE=2(large_intestine)
chr5	112175955	112175955	A	-	exonic	APC	frameshift deletion	p.T1556Nfs*3	c.4664_4665insG		1	0	0
chr5	112175958	112175958	C	A	exonic	APC	nonsynonymous SNV	p.T1556N	c.4667C>A	rs573468341	1	0	0	N
chr5	112175993	112175993	G	A	exonic	APC	nonsynonymous SNV	p.D1568N	c.4702G>A		1	0	0	D
chr5	112175999	112175999	G	A	exonic	APC	nonsynonymous SNV	p.D1570N	c.4708G>A		1	0	0	D
chr5	112176002	112176002	G	A	exonic	APC	nonsynonymous SNV	p.D1571N	c.4711G>A		1	0	0	D
chr5	149433647	149433647	G	C	exonic	CSF1R	nonsynonymous SNV	p.N968K	c.2904C>G		0	0	0	N
chr5	149433673	149433673	C	T	exonic	CSF1R	nonsynonymous SNV	p.A960T	c.2878G>A		0	0	0	N	ID=COSM310349,COSM310350;OCCURENCE=1(liver),1(lung),1(large_intestine)
chr5	149433677	149433677	A	C	exonic	CSF1R	nonsynonymous SNV	p.D958E	c.2874T>G		0	0	0	N
chr5	149433714	149433714	C	T	exonic	CSF1R	nonsynonymous SNV	p.S946N	c.2837G>A		0	0	0	N	ID=COSM5369795,COSM5369796;OCCURENCE=1(lung),1(large_intestine)
chr5	149433719	149433719	G	-	exonic	CSF1R	frameshift deletion	p.E945Rfs*7	c.2833delG		0	0	0
chr5	149433764	149433764	C	-	exonic	CSF1R	frameshift deletion	p.S929Rfs*23	c.2787delC		0	0	0
chr5	170837531	170837531	G	C	exonic	NPM1	nonsynonymous SNV	p.A283P	c.847G>C		1	0	0	D
chr5	170837532	170837532	C	T	exonic	NPM1	nonsynonymous SNV	p.A283V	c.848C>T		1	0	0	N	ID=COSM6438065;OCCURENCE=1(large_intestine)
chr5	170837537	170837537	C	-	exonic	NPM1	frameshift deletion	p.Q285Kfs*15	c.853delC		1	0	0
chr5	170837540	170837540	G	T	exonic	NPM1	nonsynonymous SNV	p.D286Y	c.856G>T		1	0	0	D
chr5	170837543	170837543	C	T	exonic	NPM1	nonsynonymous SNV	p.L287F	c.859C>T	rs17850940	1	0	0	D	ID=COSM6438063;OCCURENCE=1(large_intestine)
chr5	170837546	170837546	G	-	exonic	NPM1	frameshift deletion	p.W288	c.862_864		1	0	0
chr5	170837546	170837546	G	A	exonic	NPM1	nonsynonymous SNV	p.W288	c.862_864		1	0	0
chr5	170837564	170837564	C	T	exonic	NPM1	nonsynonymous SNV	p.L294F	c.880C>T		1	0	0	D	ID=COSM1754182;OCCURENCE=2(urinary_tract)
chr7	55211083	55211083	G	T	exonic	EGFR	nonsynonymous SNV	p.G109V	c.326G>T		0	1	0	D
chr7	55211109	55211109	G	T	exonic	EGFR	nonsynonymous SNV	p.A118S	c.352G>T		0	1	0	D
chr7	55211116	55211116	C	T	exonic	EGFR	nonsynonymous SNV	p.A120V	c.359C>T		0	1	0	N
chr7	55211154	55211154	A	G	exonic	EGFR	nonsynonymous SNV	p.K133E	c.397A>G		0	1	0	N
chr7	55211156	55211156	G	C	exonic	EGFR	nonsynonymous SNV	p.K133N	c.399G>C		0	1	0	D
chr7	55211158	55211158	A	T	exonic	EGFR	nonsynonymous SNV	p.E134V	c.401A>T		0	1	0	D
chr7	55221836	55221836	A	G	exonic	EGFR	nonsynonymous SNV	p.K294E	c.880A>G		0	1	0	N
chr7	55233045	55233045	G	T	exonic	EGFR	nonsynonymous SNV	p.V599F	c.1795G>T		0	1	0	N
chr7	55233045	55233045	G	A	exonic	EGFR	nonsynonymous SNV	p.V599I	c.1795G>A		0	1	0	N
chr7	55233050	55233050	G	C	exonic	EGFR	nonsynonymous SNV	p.M600I	c.1800G>C		0	1	0	N
chr7	55233055	55233055	A	G	exonic	EGFR	nonsynonymous SNV	p.E602G	c.1805A>G		0	1	0	N
chr7	55233069	55233069	G	-	exonic	EGFR	frameshift deletion				0	1	0		ID=COSM6196864;OCCURENCE=1(large_intestine)
chr7	55233081	55233081	G	A	exonic	EGFR	nonsynonymous SNV	p.A611T	c.1831G>A	rs201061916	0	1	0	N
chr7	55233094	55233094	A	T	exonic	EGFR	nonsynonymous SNV	p.H615L	c.1844A>T		0	1	0	N
chr7	55233100	55233100	G	A	exonic	EGFR	nonsynonymous SNV	p.C617Y	c.1850G>A		0	1	0	D
chr7	55233112	55233112	A	T	exonic	EGFR	nonsynonymous SNV	p.H621L	c.1862A>T		0	1	0	D
chr7	55233121	55233121	G	T	exonic	EGFR	nonsynonymous SNV	p.C624F	c.1871G>T	rs28384376	0	1	0	D	ID=COSM13560;OCCURENCE=1(central_nervous_system)
chr7	55233126	55233126	A	-	exonic	EGFR	frameshift deletion				0	1	0
chr7	55241689	55241689	A	G	exonic	EGFR	nonsynonymous SNV	p.K713E	c.2137A>G		0	1	0	N
chr7	55241689	55241689	A	T	exonic	EGFR	stopgain	p.K713	c.2137_2139		0	1	0
chr7	55241693	55241693	A	T	exonic	EGFR	nonsynonymous SNV	p.K714M	c.2141A>T		0	1	0	D
chr7	55241704	55241704	C	A	exonic	EGFR	nonsynonymous SNV	p.L718M	c.2152C>A		0	1	0	D	ID=COSM1716255;OCCURENCE=2(lung)
chr7	55241705	55241705	T	C	exonic	EGFR	nonsynonymous SNV	p.L718P	c.2153T>C		0	1	0	D	ID=COSM41904;OCCURENCE=1(salivary_gland)
chr7	55241708	55241708	G	T	exonic	EGFR	nonsynonymous SNV	p.G719V	c.2156G>T		0	1	0	D
chr7	55241726	55241726	C	T	exonic	EGFR	nonsynonymous SNV	p.T725M	c.2174C>T	rs767505234	0	1	0	D	ID=COSM53264;OCCURENCE=1(ovary),1(pleura),1(lung)
chr7	55241728	55241728	G	C	exonic	EGFR	nonsynonymous SNV	p.V726L	c.2176G>C		0	1	0	D
chr7	55242418	55242418	C	T	exonic	EGFR	nonsynonymous SNV	p.L730F	c.2188C>T	rs121913434	0	1	0	N	ID=COSM13180;OCCURENCE=1(oesophagus),1(skin),1(lung)
chr7	55242428	55242428	C	T	exonic	EGFR	nonsynonymous SNV	p.P733L	c.2198C>T	rs121913446	0	1	0	D	ID=COSM13181;OCCURENCE=2(lung),1(large_intestine)
chr7	55242437	55242437	A	T	exonic	EGFR	nonsynonymous SNV	p.E736V	c.2207A>T		0	1	0	N
chr7	55242438	55242438	G	C	exonic	EGFR	nonsynonymous SNV	p.E736D	c.2208G>C		0	1	0	N
chr7	55242454	55242454	G	-	exonic	EGFR	frameshift deletion	p.V742Sfs*6	c.2224delG		0	1	0
chr7	55242479	55242479	C	T	exonic	EGFR	nonsynonymous SNV	p.A750V	c.2249C>T		0	1	0	D
chr7	55242482	55242482	C	T	exonic	EGFR	nonsynonymous SNV	p.T751I	c.2252C>T	rs727504316	0	1	0	N	ID=COSM13185;OCCURENCE=2(haematopoietic_and_lymphoid_tissue),2(prostate),3(lung)
chr7	55242485	55242485	C	T	exonic	EGFR	nonsynonymous SNV	p.S752F	c.2255C>T		0	1	0	D	ID=COSM4170219;OCCURENCE=1(lung)
chr7	55242487	55242487	C	T	exonic	EGFR	nonsynonymous SNV	p.P753S	c.2257C>T	rs121913231	0	1	0	N	ID=COSM6268;OCCURENCE=2(NS),1(haematopoietic_and_lymphoid_tissue),1(kidney),2(skin),1(lung)
chr7	55242488	55242488	C	T	exonic	EGFR	nonsynonymous SNV	p.P753L	c.2258C>T	rs559717059	0	1	0	N	ID=COSM1168015;OCCURENCE=1(NS),1(oesophagus),1(lung),3(large_intestine)
chr7	55242494	55242494	C	T	exonic	EGFR	nonsynonymous SNV	p.A755V	c.2264C>T		0	1	0	D	ID=COSM6196863;OCCURENCE=1(large_intestine)
chr7	55242504	55242504	A	C	exonic	EGFR	nonsynonymous SNV	p.E758D	c.2274A>C		0	1	0	N	ID=COSM25861;OCCURENCE=1(lung)
chr7	55242508	55242508	C	T	exonic	EGFR	nonsynonymous SNV	p.L760F	c.2278C>T		0	1	0	D	ID=COSM5991529;OCCURENCE=1(skin)
chr7	55249001	55249014	CGGTGCGTTCGGCA	-	exonic	EGFR	frameshift deletion	p.A722Vfs*2	c.2164_2165insTCTAG		0	1	0
chr7	55249005	55249005	G	T	exonic	EGFR	nonsynonymous SNV	p.S768I	c.2303G>T	rs121913465	0	1	S768I	D	ID=COSM6241;OCCURENCE=1(oesophagus),1(prostate),41(lung),1(central_nervous_system)
chr7	55249047	55249047	T	A	exonic	EGFR	nonsynonymous SNV	p.L782H	c.2345T>A		0	1	0	D
chr7	55249058	55249058	G	A	exonic	EGFR	nonsynonymous SNV	p.V786M	c.2356G>A	rs762672864	0	1	0	N	ID=COSM27110;OCCURENCE=1(breast),1(skin),1(prostate),3(lung)
chr7	55249088	55249088	G	A	exonic	EGFR	nonsynonymous SNV	p.G796S	c.2386G>A	rs754426793	0	1	0	D	ID=COSM20891;OCCURENCE=1(prostate),1(lung),1(upper_aerodigestive_tract)
chr7	55249139	55249139	T	-	exonic	EGFR	frameshift deletion	p.Y813Tfs*13	c.2437delT		0	1	0
chr7	55249145	55249145	C	-	exonic	EGFR	frameshift deletion	p.L815	c.2443_2445		0	1	0
chr7	55249148	55249148	A	T	exonic	EGFR	nonsynonymous SNV	p.N771Y	c.2311A>T		0	1	0	D
chr7	55259521	55259521	A	C	exonic	EGFR	nonsynonymous SNV	p.K860T	c.2579A>C		0	1	0	D
chr7	55259524	55259524	T	A	exonic	EGFR	nonsynonymous SNV	p.L861Q	c.2582T>A	rs121913444	0	1	L861Q	N	ID=COSM6213;OCCURENCE=89(lung),1(upper_aerodigestive_tract),1(central_nervous_system)
chr7	55259533	55259533	C	A	exonic	EGFR	nonsynonymous SNV	p.A864E	c.2591C>A		0	1	0	N	ID=COSM26035;OCCURENCE=1(urinary_tract),1(lung)
chr7	55259533	55259533	C	T	exonic	EGFR	nonsynonymous SNV	p.A864V	c.2591C>T		0	1	0	N	ID=COSM219795;OCCURENCE=1(lung),2(large_intestine)
chr7	55259551	55259551	A	G	exonic	EGFR	nonsynonymous SNV	p.H870R	c.2609A>G		0	1	0	N	ID=COSM33725;OCCURENCE=2(lung)
chr7	116339642	116339642	G	C	exonic	MET	nonsynonymous SNV	p.E168D	c.504G>C		0	1	0	N
chr7	116339654	116339654	C	-	exonic	MET	frameshift deletion	p.P173Lfs*5	c.516delT		0	1	0
chr7	116339719	116339719	A	G	exonic	MET	nonsynonymous SNV	p.N194S	c.581A>G		0	1	0	N
chr7	116339727	116339727	G	-	exonic	MET	stopgain	p.V197	c.589_591		0	1	0
chr7	116339727	116339728	TG	-	exonic	MET	frameshift deletion	p.V197Rfs*39	c.589_590delGT		0	1	0
chr7	116339733	116339733	A	T	exonic	MET	nonsynonymous SNV	p.N199Y	c.595A>T		0	1	0	N
chr7	116339754	116339754	T	-	exonic	MET	frameshift deletion	p.F206	c.616_618		0	1	0
chr7	116339757	116339757	C	T	exonic	MET	nonsynonymous SNV	p.P207S	c.619C>T		0	1	0	N
chr7	116339757	116339757	C	-	exonic	MET	frameshift deletion	p.P207	c.619_621		0	1	0
chr7	116340276	116340276	A	G	exonic	MET	nonsynonymous SNV	p.K380E	c.1138A>G		0	1	0	N
chr7	116340283	116340283	A	T	exonic	MET	nonsynonymous SNV	p.N382I	c.1145A>T		0	1	0	N
chr7	116340297	116340297	C	T	exonic	MET	stopgain	p.Q387	c.1159_1161	rs757846126	0	1	0		ID=COSM6438052;OCCURENCE=1(large_intestine)
chr7	116340314	116340314	A	-	exonic	MET	frameshift deletion	p.N393Ifs*11	c.1176delC		0	1	0
chr7	116340315	116340315	A	T	exonic	MET	nonsynonymous SNV	p.N393Y	c.1177A>T		0	1	0	N
chr7	116340318	116340318	C	T	exonic	MET	nonsynonymous SNV	p.H394Y	c.1180C>T		0	1	0	N
chr7	116340325	116340325	A	G	exonic	MET	nonsynonymous SNV	p.H396R	c.1187A>G		0	1	0	N
chr7	116411987	116411987	C	T	exonic	MET	nonsynonymous SNV	p.P991L	c.2972C>T		0	1	0	N
chr7	116411989	116411989	A	G	exonic	MET	nonsynonymous SNV	p.T1010A	c.3028A>G	rs774433287	0	1	0	N
chr7	116411998	116411998	A	C	exonic	MET	nonsynonymous SNV	p.M1013L	c.3037A>C		0	1	0	N
chr7	116412005	116412005	C	T	exonic	MET	nonsynonymous SNV	p.S997L	c.2990C>T		0	1	0	N
chr7	116417481	116417481	A	G	exonic	MET	nonsynonymous SNV	p.N1118D	c.3352A>G		0	1	0	N	ID=COSM1447463;OCCURENCE=1(stomach)
chr7	116417492	116417492	G	C	exonic	MET	nonsynonymous SNV	p.K1121N	c.3363G>C		0	1	0	D
chr7	116417505	116417505	G	T	exonic	MET	nonsynonymous SNV	p.A1108S	c.3322G>T		0	1	0	D	ID=COSM1084409;OCCURENCE=1(endometrium)
chr7	116417506	116417506	C	T	exonic	MET	nonsynonymous SNV	p.A1126V	c.3377C>T		0	1	0	D
chr7	116423417	116423417	A	T	exonic	MET	nonsynonymous SNV	p.D1249V	c.3746A>T		0	1	0	N
chr7	116423429	116423429	A	G	exonic	MET	nonsynonymous SNV	p.Y1253C	c.3758A>G		0	1	0	D
chr7	116423435	116423435	T	C	exonic	MET	nonsynonymous SNV	p.V1255A	c.3764T>C		0	1	0	N
chr7	116423452	116423452	G	T	exonic	MET	nonsynonymous SNV	p.A1261S	c.3781G>T		0	1	0	N
chr7	116423462	116423462	C	T	exonic	MET	nonsynonymous SNV	p.P1264L	c.3791C>T		0	1	0	D
chr7	116423477	116423477	C	T	exonic	MET	nonsynonymous SNV	p.A1269V	c.3806C>T		0	1	0	D
chr7	116423482	116423482	G	A	exonic	MET	nonsynonymous SNV	p.E1271K	c.3811G>A		0	1	0	D	ID=COSM4767611;OCCURENCE=2(biliary_tract)
chr7	116423497	116423497	C	T	exonic	MET	stopgain	p.Q1276	c.3826_3828		0	1	0
chr7	116423507	116423507	C	T	exonic	MET	nonsynonymous SNV	p.T1261I	c.3782C>T		0	1	0	D
chr7	116423510	116423510	C	T	exonic	MET	nonsynonymous SNV	p.T1280I	c.3839C>T		0	1	0	D
chr7	116423513	116423513	A	T	exonic	MET	nonsynonymous SNV	p.K1281M	c.3842A>T		0	1	0	D
chr7	116435710	116435710	G	T	exonic	MET	nonsynonymous SNV	p.W1267L	c.3800G>T		0	1	0	D
chr7	128845102	128845102	G	C	exonic	SMO	nonsynonymous SNV	p.R199P	c.596G>C		0	1	0	N	ID=COSM6438256;OCCURENCE=1(large_intestine)
chr7	128845124	128845124	G	T	exonic	SMO	nonsynonymous SNV	p.W206C	c.618G>T		0	1	0	D
chr7	128845134	128845134	G	C	exonic	SMO	nonsynonymous SNV	p.V210L	c.628G>C		0	1	0	D
chr7	128845146	128845146	G	A	exonic	SMO	nonsynonymous SNV	p.G214S	c.640G>A	rs370713652	0	1	0	D	ID=COSM4728532;OCCURENCE=2(large_intestine)
chr7	128845174	128845174	C	T	exonic	SMO	nonsynonymous SNV	p.T223I	c.668C>T		0	1	0	D
chr7	128845198	128845198	A	G	exonic	SMO	nonsynonymous SNV	p.H231R	c.692A>G		0	1	0	D
chr7	128845206	128845206	A	T	exonic	SMO	nonsynonymous SNV	p.I234F	c.700A>T		0	1	0	D
chr7	128846037	128846037	T	C	exonic	SMO	nonsynonymous SNV	p.Y323H	c.967T>C		0	1	0	D
chr7	128846094	128846094	T	-	exonic	SMO	frameshift deletion	p.S342Pfs*45	c.1024delT		0	1	0
chr7	128846113	128846113	C	T	exonic	SMO	nonsynonymous SNV	p.T348I	c.1043C>T		0	1	0	D
chr7	128846131	128846131	C	T	exonic	SMO	nonsynonymous SNV	p.S354L	c.1061C>T	rs200099832	0	1	0	D
chr7	128846140	128846140	C	T	exonic	SMO	nonsynonymous SNV	p.T357I	c.1070C>T		0	1	0	D
chr7	128846146	128846146	A	T	exonic	SMO	nonsynonymous SNV	p.Y359F	c.1076A>T		0	1	0	D
chr7	128846162	128846162	T	-	exonic	SMO	frameshift deletion	p.W365Gfs*22	c.1092delC		0	1	0
chr7	128846165	128846165	G	-	exonic	SMO	frameshift deletion	p.W365Cfs*22	c.1095delG		0	1	0
chr7	128846380	128846380	G	C	exonic	SMO	nonsynonymous SNV	p.A406P	c.1216G>C		0	1	0	D
chr7	128846380	128846380	G	-	exonic	SMO	frameshift deletion	p.A406Pfs*19	c.1216delG		0	1	0
chr7	128846384	128846384	C	T	exonic	SMO	nonsynonymous SNV	p.P407L	c.1220C>T		0	1	0	D
chr7	128850355	128850355	G	T	exonic	SMO	nonsynonymous SNV	p.A540S	c.1618G>T		0	1	0	N
chr7	128850359	128850359	C	T	exonic	SMO	nonsynonymous SNV	p.T541M	c.1622C>T		0	1	0	D
chr7	128850359	128850359	C	G	exonic	SMO	nonsynonymous SNV	p.T541R	c.1622C>G		0	1	0	D
chr7	128850364	128850364	C	T	exonic	SMO	nonsynonymous SNV	p.L543F	c.1627C>T	rs752557747	0	1	0	N
chr7	128850383	128850383	G	T	exonic	SMO	nonsynonymous SNV	p.W549L	c.1646G>T		0	1	0	D
chr7	128851596	128851596	C	T	exonic	SMO	nonsynonymous SNV	p.P641S	c.1921C>T		0	1	0	D
chr7	140453123	140453123	G	A	exonic	BRAF	nonsynonymous SNV	p.W604	c.1810_1812		0	1	0
chr7	140453125	140453125	A	T	exonic	BRAF	nonsynonymous SNV	p.W604R	c.1810T>A		0	1	0	N	ID=COSM144980;OCCURENCE=1(lung)
chr7	140453132	140453132	T	G	exonic	BRAF	nonsynonymous SNV	p.K601N	c.1803A>C	rs121913365	0	1	K601N	D	ID=COSM1132;OCCURENCE=2(ovary),1(NS),2(haematopoietic_and_lymphoid_tissue),1(skin),1(large_intestine)	All Tumors,EL:4:LTT462, BVD-523, KO-947()
chr7	140453133	140453133	T	A	exonic	BRAF	nonsynonymous SNV	p.K601I	c.1802A>T	rs397507484	0	1	0	D	ID=COSM26491;OCCURENCE=3(skin)	All Tumors,EL:4:LTT462, BVD-523, KO-947()
chr7	140453136	140453136	A	T	exonic	BRAF	nonsynonymous SNV	p.V600E	c.1799T>A	rs113488022	0	1	V600E	D	ID=COSM476;OCCURENCE=9(salivary_gland),249(ovary),15(breast),18(bone),1014(NS),4(stomach),671(haematopoietic_and_lymphoid_tissue),7(urinary_tract),8(kidney),53(soft_tissue),12(pancreas),18(liver),4(genital_tract),2(oesophagus),1(autonomic_ganglia),4(adrenal_gland),90(pituitary),5705(skin),3(prostate),127(lung),3(meninges),13498(thyroid),12(upper_aerodigestive_tract),8(testis),95(eye),4934(large_i…	All Tumors,EL:4:LTT462, BVD-523, KO-947()
chr7	140453139	140453139	G	T	exonic	BRAF	nonsynonymous SNV	p.T599K	c.1796C>A		0	1	0	N
chr7	140453145	140453145	T	-	exonic	BRAF	frameshift deletion	p.L597Qfs*4	c.1790delT		0	1	0
chr7	140453146	140453146	G	T	exonic	BRAF	nonsynonymous SNV	p.L597I	c.1789C>A		0	1	0	D		All Tumors,EL:4:LTT462, BVD-523, KO-947()
chr7	140453148	140453148	C	T	exonic	BRAF	nonsynonymous SNV	p.G596D	c.1787G>A	rs397507483	0	1	G596D	D	ID=COSM26506;OCCURENCE=1(skin),2(cervix),1(central_nervous_system)	All Tumors,EL:4:LTT462, BVD-523, KO-947()
chr7	140453149	140453149	C	G	exonic	BRAF	nonsynonymous SNV	p.G596R	c.1786G>C	rs121913361	0	1	G596R	D	ID=COSM469;OCCURENCE=2(urinary_tract),2(skin),2(lung),4(large_intestine)	All Tumors,EL:4:LTT462, BVD-523, KO-947()
chr7	140453154	140453154	T	C	exonic	BRAF	nonsynonymous SNV	p.D594G	c.1781A>G	rs121913338	0	1	D594G	D	ID=COSM467;OCCURENCE=1(salivary_gland),2(ovary),1(breast),3(NS),3(stomach),7(haematopoietic_and_lymphoid_tissue),2(urinary_tract),3(pancreas),10(skin),1(prostate),10(lung),1(upper_aerodigestive_tract),1(eye),29(large_intestine),2(central_nervous_system),4(endometrium)	All Tumors,EL:4:LTT462, BVD-523, KO-947()
chr7	140453155	140453155	C	T	exonic	BRAF	nonsynonymous SNV	p.D594N	c.1780G>A	rs397516896	0	1	D594N	D	ID=COSM27639;OCCURENCE=1(NS),4(haematopoietic_and_lymphoid_tissue),1(pancreas),15(skin),3(lung),9(large_intestine),1(biliary_tract),1(small_intestine)	All Tumors,EL:4:LTT462, BVD-523, KO-947()
chr7	140453170	140453170	T	A	exonic	BRAF	nonsynonymous SNV	p.T589S	c.1765A>T		0	1	0	D		All Tumors,EL:4:LTT462, BVD-523, KO-947()
chr7	140453176	140453176	C	T	exonic	BRAF	nonsynonymous SNV	p.D587N	c.1759G>A		0	1	0	D	ID=COSM21608;OCCURENCE=1(NS),1(skin)	All Tumors,EL:4:LTT462, BVD-523, KO-947()
chr7	140453179	140453179	C	T	exonic	BRAF	nonsynonymous SNV	p.E586K	c.1756G>A	rs121913340	0	1	0	D	ID=COSM463;OCCURENCE=1(ovary),1(NS),1(kidney),1(skin)	All Tumors,EL:4:LTT462, BVD-523, KO-947()
chr7	140481411	140481411	C	A	exonic	BRAF	nonsynonymous SNV	p.G466V	c.1397G>T	rs121913351	0	1	G466V	D	ID=COSM451;OCCURENCE=2(ovary),1(breast),1(NS),1(haematopoietic_and_lymphoid_tissue),3(skin),16(lung),1(cervix),1(large_intestine),1(small_intestine)	All Tumors,EL:4:LTT462, BVD-523, KO-947()
chr7	140481412	140481412	C	T	exonic	BRAF	nonsynonymous SNV	p.G466R	c.1396G>A	rs121913353	0	1	0	D	ID=COSM253328;OCCURENCE=1(skin),2(lung),1(large_intestine),1(small_intestine)	All Tumors,EL:4:LTT462, BVD-523, KO-947()
chr7	140481414	140481414	G	T	exonic	BRAF	nonsynonymous SNV	p.S465Y	c.1394C>A		0	1	0	D		All Tumors,EL:4:LTT462, BVD-523, KO-947()
chr7	140481475	140481475	C	T	exonic	BRAF	nonsynonymous SNV	p.D445N	c.1333G>A	rs752429313	0	1	0	D		All Tumors,EL:4:LTT462, BVD-523, KO-947()
chr8	38282108	38282108	C	A	exonic	FGFR1	synonymous SNV	p.P283H	c.848_849delCGinsAT		0	1	0
chr8	38285588	38285588	G	T	exonic	FGFR1	nonsynonymous SNV	p.P156T	c.466C>A		0	1	0	D
chr8	38285936	38285936	C	T	exonic	FGFR1	nonsynonymous SNV	p.E159K	c.475G>A		0	1	0	N
chr8	38285951	38285951	C	T	exonic	FGFR1	nonsynonymous SNV	p.A154T	c.460G>A		0	1	0	N
chr9	5073770	5073770	G	T	exonic	JAK2	nonsynonymous SNV	p.V617F	c.1849G>T	rs77375493	0	1	0	D	ID=COSM12600;OCCURENCE=1(NS),41052(haematopoietic_and_lymphoid_tissue),3(lung),1(central_nervous_system)
chr9	5073784	5073784	G	C	exonic	JAK2	nonsynonymous SNV	p.E621D	c.1863G>C		0	1	0	D
chr9	80336244	80336244	C	T	exonic	GNAQ	nonsynonymous SNV	p.V359I	c.1075G>A		0	1	0	N	ID=COSM13666;OCCURENCE=1(skin)
chr9	80336259	80336259	T	C	exonic	GNAQ	nonsynonymous SNV	p.K354E	c.1060A>G		0	1	0	D
chr9	80336295	80336295	G	-	exonic	GNAQ	frameshift deletion	p.A342Lfs*10	c.1024delG		0	1	0
chr9	80336301	80336301	C	A	exonic	GNAQ	nonsynonymous SNV	p.V340F	c.1018G>T		0	1	0	D
chr9	80336306	80336306	C	G	exonic	GNAQ	nonsynonymous SNV	p.R338P	c.1013G>C		0	1	0	D
chr9	80336307	80336307	G	A	exonic	GNAQ	nonsynonymous SNV	p.R338C	c.1012C>T		0	1	0	D	ID=COSM6672195;OCCURENCE=1(large_intestine)
chr9	80336318	80336318	G	A	exonic	GNAQ	nonsynonymous SNV	p.T334I	c.1001C>T		0	1	0	D
chr9	80336324	80336324	G	A	exonic	GNAQ	nonsynonymous SNV	p.T332I	c.995C>T		0	1	0	D
chr9	80336332	80336332	G	-	exonic	GNAQ	frameshift deletion	p.C330Afs*22	c.987delG		0	1	0
chr9	80336340	80336340	G	A	exonic	GNAQ	nonsynonymous SNV	p.H327Y	c.979C>T		0	1	0	D	ID=COSM6342243;OCCURENCE=1(large_intestine)
chr9	80336346	80336346	A	G	exonic	GNAQ	nonsynonymous SNV	p.Y325H	c.973T>C		0	1	0	D
chr9	80336379	80336379	C	T	exonic	GNAQ	nonsynonymous SNV	p.V314M	c.940G>A		0	1	0	D	ID=COSM6342237;OCCURENCE=1(large_intestine)
chr9	80336383	80336383	C	G	exonic	GNAQ	nonsynonymous SNV	p.M312I	c.936G>C		0	1	0	D
chr9	80336418	80336418	C	G	exonic	GNAQ	nonsynonymous SNV	p.D301H	c.901G>C		0	1	0	D
chr9	80336429	80336429	C	T	exonic	GNAQ	nonsynonymous SNV	p.G297E	c.890G>A		0	1	0	D
chr9	80343467	80343467	C	G	exonic	GNAQ	nonsynonymous SNV	p.M284I	c.852G>C		0	1	0	D
chr9	80343486	80343486	A	C	exonic	GNAQ	nonsynonymous SNV	p.L278R	c.833T>G		0	1	0	D
chr9	80343523	80343523	T	C	exonic	GNAQ	nonsynonymous SNV	p.N266D	c.796A>G		0	1	0	N
chr9	80343524	80343524	C	T	exonic	GNAQ	synonymous SNV	p.Q265	c.793_795		0	1	0
chr9	80343525	80343525	T	A	exonic	GNAQ	nonsynonymous SNV	p.Q265L	c.794A>T		0	1	0	D
chr9	80343569	80343569	G	-	exonic	GNAQ	frameshift deletion	p.E250	c.748_750		0	1	0
chr9	80343574	80343574	C	T	exonic	GNAQ	nonsynonymous SNV	p.E249K	c.745G>A		0	1	0	D	ID=COSM77782;OCCURENCE=1(ovary)
chr9	80409390	80409390	A	T	exonic	GNAQ	nonsynonymous SNV	p.S242T	c.724T>A		0	1	0	D
chr9	80409396	80409396	C	G	exonic	GNAQ	nonsynonymous SNV	p.V240L	c.718G>C		0	1	0	N
chr9	80409407	80409407	T	C	exonic	GNAQ	nonsynonymous SNV	p.D236G	c.707A>G		0	1	0	D
chr9	80409425	80409425	A	T	exonic	GNAQ	nonsynonymous SNV	p.V230E	c.689T>A		0	1	0	D
chr9	80409445	80409445	A	-	exonic	GNAQ	frameshift deletion	p.T224Pfs*6	c.669delC		0	1	0
chr9	80409456	80409456	T	-	exonic	GNAQ	frameshift deletion	p.F220Lfs*10	c.660delT		0	1	0
chr9	80409465	80409465	T	C	exonic	GNAQ	nonsynonymous SNV	p.I217V	c.649A>G		0	1	0	D
chr9	80409469	80409469	A	-	exonic	GNAQ	frameshift deletion	p.K215	c.643_645		0	1	0		ID=COSM6342247;OCCURENCE=1(large_intestine)
chr9	80412436	80412436	C	T	exonic	GNAQ	nonsynonymous SNV	p.R202K	c.605G>A		0	1	0	D
chr9	80412506	80412506	C	T	exonic	GNAQ	nonsynonymous SNV	p.V179M	c.535G>A		0	1	0	D	ID=COSM6342249;OCCURENCE=1(large_intestine)
chr9	80412541	80412541	A	T	exonic	GNAQ	nonsynonymous SNV	p.V167E	c.500T>A		0	1	0	D
chr9	80412545	80412545	G	T	exonic	GNAQ	nonsynonymous SNV	p.R166S	c.496C>A		0	1	0	D
chr9	133738347	133738347	G	-	exonic	ABL1	frameshift deletion	p.G270Afs*16	c.804delC		0	1	0
chr9	133738361	133738361	G	T	exonic	ABL1	nonsynonymous SNV	p.G273V	c.818G>T		0	1	0	D
chr9	133738393	133738393	A	G	exonic	ABL1	nonsynonymous SNV	p.S284G	c.850A>G	rs760763041	0	1	0	N
chr9	133738405	133738405	G	T	exonic	ABL1	nonsynonymous SNV	p.A288S	c.862G>T		0	1	0	D
chr9	133738411	133738411	A	G	exonic	ABL1	nonsynonymous SNV	p.K290E	c.868A>G		0	1	0	D
chr9	133738414	133738414	A	G	exonic	ABL1	nonsynonymous SNV	p.T291A	c.871A>G		0	1	0	N
chr9	133747556	133747556	C	T	exonic	ABL1	nonsynonymous SNV	p.A307V	c.920C>T		0	1	0	D	ID=COSM6191469;OCCURENCE=1(lung)
chr9	133747561	133747561	A	C	exonic	ABL1	nonsynonymous SNV	p.M309L	c.925A>C		0	1	0	N
chr9	133747562	133747562	T	A	exonic	ABL1	nonsynonymous SNV	p.M290K	c.869T>A		0	1	0	D
chr9	133747563	133747563	G	C	exonic	ABL1	nonsynonymous SNV	p.M309I	c.927G>C		0	1	0	D
chr9	133747580	133747580	C	A	exonic	ABL1	nonsynonymous SNV	p.P315H	c.944C>A		0	1	0	D
chr9	133748285	133748285	G	A	exonic	ABL1	nonsynonymous SNV	p.E335K	c.1003G>A		0	1	0	D
chr9	133748328	133748328	G	A	exonic	ABL1	nonsynonymous SNV	p.C349Y	c.1046G>A		0	1	0	D	ID=COSM6591038,COSM6591039,COSM6591040;OCCURENCE=1(large_intestine)
chr9	133748348	133748348	G	A	exonic	ABL1	nonsynonymous SNV	p.A356T	c.1066G>A	rs1060499548	0	1	0	N
chr9	133748354	133748354	G	C	exonic	ABL1	nonsynonymous SNV	p.V358L	c.1072G>C		0	1	0	N
chr9	133748360	133748360	G	-	exonic	ABL1	frameshift deletion	p.L341Cfs*31	c.1021delC		0	1	0
chr9	133748388	133748388	C	T	exonic	ABL1	nonsynonymous SNV	p.A369V	c.1106C>T		0	1	0	D
chr9	133748424	133748424	G	T	exonic	ABL1	nonsynonymous SNV	p.R381I	c.1142G>T		0	1	0	D
chr9	133750355	133750355	C	T	exonic	ABL1	nonsynonymous SNV	p.H415Y	c.1243C>T		0	1	0	D
chr9	133750376	133750376	A	C	exonic	ABL1	nonsynonymous SNV	p.I403L	c.1207A>C		0	1	0	N
chr9	133750386	133750386	C	T	exonic	ABL1	nonsynonymous SNV	p.T425I	c.1274C>T		0	1	0	N
chr9	133750392	133750392	C	T	exonic	ABL1	nonsynonymous SNV	p.P427L	c.1280C>T		0	1	0	D	ID=COSM364137;OCCURENCE=1(NS),1(lung)
chr9	133750419	133750419	C	T	exonic	ABL1	nonsynonymous SNV	p.S436F	c.1307C>T		0	1	0	D
chr9	133750427	133750427	T	A	exonic	ABL1	nonsynonymous SNV	p.S439T	c.1315T>A		0	1	0	D
chr9	139397766	139397766	C	T	exonic	NOTCH1	nonsynonymous SNV	p.E1679K	c.5035G>A		1	1	0	D
chr9	139399342	139399342	G	A	exonic	NOTCH1	nonsynonymous SNV	p.H1601Y	c.4801C>T		1	1	0	D
chr9	139399348	139399348	C	T	exonic	NOTCH1	nonsynonymous SNV	p.V1599M	c.4795G>A	rs543770603	1	1	0	D
chr9	139399378	139399378	A	G	exonic	NOTCH1	nonsynonymous SNV	p.S1589P	c.4765T>C		1	1	0	D
chr9	139399386	139399386	C	T	exonic	NOTCH1	nonsynonymous SNV	p.R1586H	c.4757G>A	rs201360886	1	1	0	D
chr9	139399402	139399402	G	A	exonic	NOTCH1	nonsynonymous SNV	p.P1581S	c.4741C>T	rs769288225	1	1	0	D
chr9	139399402	139399402	G	T	exonic	NOTCH1	nonsynonymous SNV	p.P1581T	c.4741C>A		1	1	0	D
chr9	139399408	139399408	G	T	exonic	NOTCH1	nonsynonymous SNV	p.L1579M	c.4735C>A		1	1	0	D
chr9	139399414	139399414	C	T	exonic	NOTCH1	nonsynonymous SNV	p.V1577M	c.4729G>A		1	1	0	D	ID=COSM308595;OCCURENCE=1(haematopoietic_and_lymphoid_tissue)
chr9	139399420	139399422	GTG	-	exonic	NOTCH1	nonframeshift deletion	p.V1578delV	c.4732_4734delGTG		1	1	0		ID=COSM5751398,COSM5751399,COSM144624;OCCURENCE=7(haematopoietic_and_lymphoid_tissue)
chr9	139399428	139399428	C	G	exonic	NOTCH1	nonsynonymous SNV	p.G1572A	c.4715G>C		1	1	0	D
chr9	139399435	139399435	C	T	exonic	NOTCH1	nonsynonymous SNV	p.A1570T	c.4708G>A		1	1	0	D	ID=COSM6438061;OCCURENCE=1(large_intestine)
chr9	139399444	139399444	C	T	exonic	NOTCH1	nonsynonymous SNV	p.E1567K	c.4699G>A		1	1	0	D
chr9	139399450	139399450	C	T	exonic	NOTCH1	nonsynonymous SNV	p.V1565I	c.4693G>A		1	1	0	N
