# Supplementary material for: Transitioning the Molecular Tumor Board from Proof of Concept to Clinical Routine: A German Single-Center Analysis
Source: Cancers (Basel). 2021 Mar 8;13(5):1151. doi: 10.3390/cancers13051151 (PMC7962829; doi:10.3390/cancers13051151)
Supplement: Supplementary file 1 [file cancers-13-01151-s001.zip › Supplementary_Data_2.xlsx]

## Sheet: Hotspot_Mutations
Chr	Start	End	Ref	Alt	Type	Symbol	Genename	Exonic Function	AAChange	snp150	TSG	OG	HS	Condel	Cosmic84	Target	DGIdb	OncoKB
chr1	115256529	115256529	T	C	exonic	NRAS	NRAS proto-oncogene, GTPase	nonsynonymous SNV	p.Q61R	rs11554290	0	1	Q61R	D	ID=COSM584;OCCURENCE=5(ovary),1(bone),7(breast),110(NS),1(stomach),177(haematopoietic_and_lymphoid_tissue),1(kidney),5(soft_tissue),9(urinary_tract),3(pancreas),3(liver),1(genital_tract),7(adrenal_gland),578(skin),13(lung),1(cervix),11(meninges),449(thyroid),5(upper_aerodigestive_tract),3(testis),1(thymus),10(eye),61(large_intestine),6(central_nervous_system),1(small_intestine),7(biliary_tract),4…	Vemurafenib, Dabrafenib, RAF inhibitors, MEK inhibitors	Cetuximab; BYL719; SELUMETINIB (AZD6244); Everolimus; Cetuximab; MK2206; CC-90003; Radioiodine Uptake Therapy; Panitumumab; Selumetinib; BINIMETINIB (MEK162); NS1; PRECLINICAL; BKM120; METFORMIN; SHP099; MEK; LAK; Cetuximab; MK-1775; Trametinib; Obatoclax; MEK162; PANITUMUMAB; GDC0879; BINIMETINIB; VEMURAFENIB; TPA; PF-05212384; Atezolizumab; CCT196969; Trametinib; PD-0325901; Vemurafenib; inhibi…	Melanoma,EL:3A:Binimetinib, Binimetinib + Ribociclib(16273091, 28284557, 22983396) ; Thyroid Cancer,EL:3A:Selumetinib + Radioiodine Uptake Therapy(22105174, 23406027) ; Colorectal Cancer,EL:R1:Panitumumab, Cetuximab(20619739, 24024844, 25110411, 24024839)
chr1	115258747	115258747	C	A	exonic	NRAS	NRAS proto-oncogene, GTPase	nonsynonymous SNV	p.G12V	rs121913237	0	1	G12V	D	ID=COSM566;OCCURENCE=1(ovary),92(haematopoietic_and_lymphoid_tissue),8(skin),1(prostate),2(thyroid),1(testis),14(large_intestine)	Vemurafenib, Dabrafenib, RAF inhibitors, MEK inhibitors	Cetuximab; BYL719; SELUMETINIB (AZD6244); Everolimus; Cetuximab; MK2206; CC-90003; Radioiodine Uptake Therapy; Panitumumab; Selumetinib; BINIMETINIB (MEK162); NS1; PRECLINICAL; BKM120; METFORMIN; SHP099; MEK; LAK; Cetuximab; MK-1775; Trametinib; Obatoclax; MEK162; PANITUMUMAB; GDC0879; BINIMETINIB; VEMURAFENIB; TPA; PF-05212384; Atezolizumab; CCT196969; Trametinib; PD-0325901; Vemurafenib; inhibi…	Melanoma,EL:3A:Binimetinib, Binimetinib + Ribociclib(16273091, 28284557, 22983396) ; Thyroid Cancer,EL:3A:Selumetinib + Radioiodine Uptake Therapy(22105174, 23406027) ; Colorectal Cancer,EL:R1:Panitumumab, Cetuximab(20619739, 24024844, 25110411, 24024839)
chr10	43617416	43617416	T	C	exonic	RET	ret proto-oncogene	nonsynonymous SNV	p.M918T	rs74799832	0	1	M918T	D	ID=COSM4770356,COSM965;OCCURENCE=1(breast),30(adrenal_gland),325(thyroid)	Sorafenib, vandetinib, RET Inhibitors	IMATINIB; INK128; Y078-DM1; Vandetanib; Everolimus; SORAFENIB; AT9283; AMUVATINIB; LINIFANIB; Lenvatinib; Motesanib; LENVATINIB; TAMATINIB; VANDETANIB; VANDETANIB; SUNITINIB; DOVITINIB; SU11248; COMPOUND 8H [PMID: 21561767]; BAY 43-9006; Sunitinib; VANDETANIB; IMATINIB; SUNITINIB; Vandetanib; VANDETANIB; QUIZARTINIB; HG-6-63-01; Pz-1; VANDETANIB; MOTESANIB; AST-487; MOTESANIB; REGORAFENIB; SORAFE…
chr12	25378562	25378562	C	T	exonic	KRAS	KRAS proto-oncogene, GTPase	nonsynonymous SNV	p.A146T	rs121913527	0	1	A146T	D	ID=COSM19404,COSM1165198;OCCURENCE=2(stomach),29(haematopoietic_and_lymphoid_tissue),1(urinary_tract),3(pancreas),1(peritoneum),1(genital_tract),1(skin),1(upper_aerodigestive_tract),128(large_intestine),2(small_intestine),3(biliary_tract),2(endometrium)	Cetuximab, MEK inhibitors	lenalidomide; GA201; 3144; Selumetinib; BKM120; Gefitinib; CGM097; IRX4204; MK2206; Radiotherapy; Sorafenib; SCH772984; CISPLATIN; ERLOTINIB; CHEMOTHERAPY; APS-2-79; GDC0879; KO-947; AZD8186; Vemurafenib; PEMBROLIZUMAB; Ipatasertib; Cabozantinib; Trametinib; GI-4000; PANITUMUMAB; AZD5363; LY3009120; Lapatinib; RAFAMETINIB; KO-947; CETUXIMAB; GDC-0068; Cetuximab; DEL-22379; Cetuximab; NS1; BCL2 in…	Colorectal Cancer,EL:R1:Panitumumab, Cetuximab(21228335, 20619739, 18316791, 20921465, 24024839) ; Non-Small Cell Lung Cancer,EL:4:Binimetinib, Trametinib(25801412, 23934108, 22805291, 24746704, 28783719) ; All Tumors,EL:4:LY3214996, KO-947, GDC-0994(22805291, 15483017, 28783719)
chr12	25378648	25378648	T	C	exonic	KRAS	KRAS proto-oncogene, GTPase	nonsynonymous SNV	p.K117R		0	1	K117R	D	ID=COSM4696722,COSM4696721;OCCURENCE=2(large_intestine)	Cetuximab, MEK inhibitors	lenalidomide; GA201; 3144; Selumetinib; BKM120; Gefitinib; CGM097; IRX4204; MK2206; Radiotherapy; Sorafenib; SCH772984; CISPLATIN; ERLOTINIB; CHEMOTHERAPY; APS-2-79; GDC0879; KO-947; AZD8186; Vemurafenib; PEMBROLIZUMAB; Ipatasertib; Cabozantinib; Trametinib; GI-4000; PANITUMUMAB; AZD5363; LY3009120; Lapatinib; RAFAMETINIB; KO-947; CETUXIMAB; GDC-0068; Cetuximab; DEL-22379; Cetuximab; NS1; BCL2 in…	Colorectal Cancer,EL:R1:Panitumumab, Cetuximab(21228335, 20619739, 18316791, 20921465, 24024839) ; Non-Small Cell Lung Cancer,EL:4:Binimetinib, Trametinib(25801412, 23934108, 22805291, 24746704, 28783719) ; All Tumors,EL:4:LY3214996, KO-947, GDC-0994(22805291, 15483017, 28783719)
chr12	25398282	25398282	C	G	exonic	KRAS	KRAS proto-oncogene, GTPase	nonsynonymous SNV	p.G13R	rs121913535	0	1	G13R	D	ID=COSM3384258,COSM529;OCCURENCE=1(ovary),1(haematopoietic_and_lymphoid_tissue),1(soft_tissue),1(urinary_tract),4(pancreas),1(peritoneum),6(lung),2(thyroid),45(large_intestine),4(biliary_tract)	Cetuximab, MEK inhibitors	lenalidomide; GA201; 3144; Selumetinib; BKM120; Gefitinib; CGM097; IRX4204; MK2206; Radiotherapy; Sorafenib; SCH772984; CISPLATIN; ERLOTINIB; CHEMOTHERAPY; APS-2-79; GDC0879; KO-947; AZD8186; Vemurafenib; PEMBROLIZUMAB; Ipatasertib; Cabozantinib; Trametinib; GI-4000; PANITUMUMAB; AZD5363; LY3009120; Lapatinib; RAFAMETINIB; KO-947; CETUXIMAB; GDC-0068; Cetuximab; DEL-22379; Cetuximab; NS1; BCL2 in…	Colorectal Cancer,EL:R1:Panitumumab, Cetuximab(21228335, 20619739, 18316791, 20921465, 24024839) ; Non-Small Cell Lung Cancer,EL:4:Binimetinib, Trametinib(25801412, 23934108, 22805291, 24746704, 28783719) ; All Tumors,EL:4:LY3214996, KO-947, GDC-0994(22805291, 15483017, 28783719)
chr12	25398284	25398284	C	T	exonic	KRAS	KRAS proto-oncogene, GTPase	nonsynonymous SNV	p.G12D	rs121913529	0	1	G12D	D	ID=COSM1135366,COSM521;OCCURENCE=1(salivary_gland),321(ovary),23(breast),17(NS),2(penis),218(haematopoietic_and_lymphoid_tissue),106(stomach),7(kidney),23(urinary_tract),28(soft_tissue),2985(pancreas),18(liver),95(peritoneum),1(genital_tract),16(oesophagus),20(gastrointestinal_tract_(site_indeterminate)),39(skin),22(prostate),1273(lung),24(cervix),37(thyroid),33(upper_aerodigestive_tract),2(testi…	Cetuximab, MEK inhibitors	lenalidomide; GA201; 3144; Selumetinib; BKM120; Gefitinib; CGM097; IRX4204; MK2206; Radiotherapy; Sorafenib; SCH772984; CISPLATIN; ERLOTINIB; CHEMOTHERAPY; APS-2-79; GDC0879; KO-947; AZD8186; Vemurafenib; PEMBROLIZUMAB; Ipatasertib; Cabozantinib; Trametinib; GI-4000; PANITUMUMAB; AZD5363; LY3009120; Lapatinib; RAFAMETINIB; KO-947; CETUXIMAB; GDC-0068; Cetuximab; DEL-22379; Cetuximab; NS1; BCL2 in…	Colorectal Cancer,EL:R1:Panitumumab, Cetuximab(21228335, 20619739, 18316791, 20921465, 24024839) ; Non-Small Cell Lung Cancer,EL:4:Binimetinib, Trametinib(25801412, 23934108, 22805291, 24746704, 28783719) ; All Tumors,EL:4:LY3214996, KO-947, GDC-0994(22805291, 15483017, 28783719)
chr12	25398284	25398284	C	A	exonic	KRAS	KRAS proto-oncogene, GTPase	nonsynonymous SNV	p.G12V	rs121913529	0	1	G12V	D	ID=COSM1140133,COSM520;OCCURENCE=1(vulva),2(pleura),310(ovary),13(breast),10(NS),38(stomach),74(haematopoietic_and_lymphoid_tissue),6(kidney),6(soft_tissue),21(urinary_tract),1939(pancreas),7(liver),36(peritoneum),4(oesophagus),7(genital_tract),1(autonomic_ganglia),11(gastrointestinal_tract_(site_indeterminate)),29(skin),40(prostate),1476(lung),20(thyroid),12(cervix),4(upper_aerodigestive_tract),…	Cetuximab, MEK inhibitors	lenalidomide; GA201; 3144; Selumetinib; BKM120; Gefitinib; CGM097; IRX4204; MK2206; Radiotherapy; Sorafenib; SCH772984; CISPLATIN; ERLOTINIB; CHEMOTHERAPY; APS-2-79; GDC0879; KO-947; AZD8186; Vemurafenib; PEMBROLIZUMAB; Ipatasertib; Cabozantinib; Trametinib; GI-4000; PANITUMUMAB; AZD5363; LY3009120; Lapatinib; RAFAMETINIB; KO-947; CETUXIMAB; GDC-0068; Cetuximab; DEL-22379; Cetuximab; NS1; BCL2 in…	Colorectal Cancer,EL:R1:Panitumumab, Cetuximab(21228335, 20619739, 18316791, 20921465, 24024839) ; Non-Small Cell Lung Cancer,EL:4:Binimetinib, Trametinib(25801412, 23934108, 22805291, 24746704, 28783719) ; All Tumors,EL:4:LY3214996, KO-947, GDC-0994(22805291, 15483017, 28783719)
chr12	25398285	25398285	C	G	exonic	KRAS	KRAS proto-oncogene, GTPase	nonsynonymous SNV	p.G12R	rs121913530	0	1	G12R	D	ID=COSM518,COSM1157797;OCCURENCE=30(ovary),8(bone),8(breast),2(NS),1(stomach),22(haematopoietic_and_lymphoid_tissue),7(urinary_tract),796(pancreas),1(peritoneum),1(oesophagus),2(gastrointestinal_tract_(site_indeterminate)),5(skin),1(prostate),101(lung),2(cervix),19(thyroid),2(upper_aerodigestive_tract),4(testis),292(large_intestine),2(central_nervous_system),3(small_intestine),27(biliary_tract),4…	Cetuximab, MEK inhibitors	lenalidomide; GA201; 3144; Selumetinib; BKM120; Gefitinib; CGM097; IRX4204; MK2206; Radiotherapy; Sorafenib; SCH772984; CISPLATIN; ERLOTINIB; CHEMOTHERAPY; APS-2-79; GDC0879; KO-947; AZD8186; Vemurafenib; PEMBROLIZUMAB; Ipatasertib; Cabozantinib; Trametinib; GI-4000; PANITUMUMAB; AZD5363; LY3009120; Lapatinib; RAFAMETINIB; KO-947; CETUXIMAB; GDC-0068; Cetuximab; DEL-22379; Cetuximab; NS1; BCL2 in…	Colorectal Cancer,EL:R1:Panitumumab, Cetuximab(21228335, 20619739, 18316791, 20921465, 24024839) ; Non-Small Cell Lung Cancer,EL:4:Binimetinib, Trametinib(25801412, 23934108, 22805291, 24746704, 28783719) ; All Tumors,EL:4:LY3214996, KO-947, GDC-0994(22805291, 15483017, 28783719)
chr12	25398285	25398285	C	A	exonic	KRAS	KRAS proto-oncogene, GTPase	nonsynonymous SNV	p.G12C	rs121913530	0	1	G12C	D	ID=COSM1140136,COSM516;OCCURENCE=45(ovary),11(breast),2(penis),10(NS),16(stomach),26(haematopoietic_and_lymphoid_tissue),4(kidney),17(soft_tissue),15(urinary_tract),174(pancreas),6(liver),11(peritoneum),2(oesophagus),1(genital_tract),4(gastrointestinal_tract_(site_indeterminate)),1(adrenal_gland),7(skin),10(prostate),2330(lung),3(cervix),18(thyroid),8(upper_aerodigestive_tract),2(testis),1927(lar…	Cetuximab, MEK inhibitors	lenalidomide; GA201; 3144; Selumetinib; BKM120; Gefitinib; CGM097; IRX4204; MK2206; Radiotherapy; Sorafenib; SCH772984; CISPLATIN; ERLOTINIB; CHEMOTHERAPY; APS-2-79; GDC0879; KO-947; AZD8186; Vemurafenib; PEMBROLIZUMAB; Ipatasertib; Cabozantinib; Trametinib; GI-4000; PANITUMUMAB; AZD5363; LY3009120; Lapatinib; RAFAMETINIB; KO-947; CETUXIMAB; GDC-0068; Cetuximab; DEL-22379; Cetuximab; NS1; BCL2 in…	Colorectal Cancer,EL:R1:Panitumumab, Cetuximab(21228335, 20619739, 18316791, 20921465, 24024839) ; Non-Small Cell Lung Cancer,EL:4:Binimetinib, Trametinib(25801412, 23934108, 22805291, 24746704, 28783719) ; All Tumors,EL:4:LY3214996, KO-947, GDC-0994(22805291, 15483017, 28783719)
chr12	112888210	112888210	G	A	exonic	PTPN11	protein tyrosine phosphatase, non-receptor type 11	nonsynonymous SNV	p.E76K	rs121918464	0	1	E76K	D	ID=COSM13000;OCCURENCE=1(breast),109(haematopoietic_and_lymphoid_tissue),1(skin),1(lung),1(large_intestine)	.	II-B08; U0126; cryptotanshinone; PLX4720; Refametinib; N/A; STIBOGLUCONATE; PD98059
chr15	66729163	66729163	C	T	exonic	MAP2K1	mitogen-activated protein kinase kinase 1	nonsynonymous SNV	p.P124L	rs397516792	0	1	P124L	D	ID=COSM1315861;OCCURENCE=3(NS),5(skin),1(large_intestine)	Vemurafenib, MEK inhibitors	SELUMETINIB; WX-554; TRAMETINIB; BAY 869766; PIMASERTIB; COBIMETINIB; VEMURAFENIB; TRAMETINIB; TRAMETINIB; TRAMETINIB; PIMASERTIB; BALAMAPIMOD; CI-1040; Cobimetinib; GDC-0973; GSK2126458; CI-1040; AZD6244; TRAMETINIB DIMETHYL SULFOXIDE; CI-1040; BINIMETINIB; AZD8330; MEK162; Encorafenib; Cetuximab; PD 0325901; DABRAFENIB; MEK162; MSC1936369B; SCH772984; PD 0325901; TRAMETINIB; TAK-733; CI-1040; P…	Melanoma,EL:3A:Cobimetinib, Trametinib(25351745, 26324360, 26566875, 25370473) ; Low-Grade Serous Ovarian Cancer,EL:3A:Cobimetinib, Trametinib(25351745, 26324360, 26566875, 25370473) ; Non-Small Cell Lung Cancer,EL:3A:Cobimetinib, Trametinib(25351745, 26324360, 26566875, 25370473) ; Histiocytic Disorder,EL:3A:Cobimetinib, Trametinib(25351745, 26324360, 26566875, 25370473)
chr15	90631838	90631838	C	T	exonic	IDH2	isocitrate dehydrogenase (NADP(+)) 2, mitochondrial	nonsynonymous SNV	p.R172K	rs121913503	0	1	R172K	D	ID=COSM33733;OCCURENCE=1(breast),4(bone),213(haematopoietic_and_lymphoid_tissue),1(liver),1(prostate),70(central_nervous_system),15(biliary_tract)	IDH inhibitorss	ENASIDENIB (AG-221); AG-881; AGI-6780; Enasidenib; Enasidenib; Venetoclax; AG-221; ENASIDENIB; ENASIDENIB; Dasatinib; Saracatinib; Quizartinib; Venetoclax; OLAPARIB; Dasatinib
chr17	7574018	7574018	G	A	exonic	TP53	tumor protein p53	nonsynonymous SNV	p.R337C	rs587782529	1	0	R337C	D	ID=COSM11071,COSM117591;OCCURENCE=1(salivary_gland),1(vulva),1(ovary),8(breast),1(NS),8(haematopoietic_and_lymphoid_tissue),6(stomach),4(kidney),3(pancreas),1(peritoneum),2(liver),2(oesophagus),1(adrenal_gland),1(skin),1(prostate),4(lung),1(upper_aerodigestive_tract),10(large_intestine),5(central_nervous_system),1(biliary_tract),1(endometrium)	Wee1 inhibitors, Chk1 inhibitors, kevetrin, APR-246, nutlins, gene therapy	CTX-1; Gemcitabine; GRANISETRON; epirubicin; TOPICAL CORTICOSTEROIDS; Trametinib; AD.P53-DC; Cisplatin; YONDELIS; Doxorubicin; MK-1775; Paclitaxel; ZINC CHLORIDE; PD-0325901; PK11007; Temozolomide; TC-A2317; NU6027; DAB; IGF-1R antibody; PT2399; Ifosfamide; SELUMETINIB (AZD6244); EGFR antibody; IL-12; METHIMAZOLE; Cytarabine; CURAXIN CBLC102; Pramlintide; CAPECITABINE; Docetaxel; PROPYLTHIOURACIL…
chr17	7577094	7577094	G	A	exonic	TP53	tumor protein p53	nonsynonymous SNV	p.R282W	rs28934574	1	0	R282W	D	ID=COSM10704,COSM1636702,COSM3378339,COSM99925;OCCURENCE=1(salivary_gland),6(vulva),20(ovary),3(bone),33(breast),2(NS),13(haematopoietic_and_lymphoid_tissue),47(stomach),1(soft_tissue),13(urinary_tract),2(kidney),34(pancreas),2(peritoneum),7(liver),76(oesophagus),16(skin),7(prostate),25(lung),2(thyroid),54(upper_aerodigestive_tract),1(thymus),197(large_intestine),41(central_nervous_system),3(smal…	Wee1 inhibitors, Chk1 inhibitors, kevetrin, APR-246, nutlins, gene therapy	CTX-1; Gemcitabine; GRANISETRON; epirubicin; TOPICAL CORTICOSTEROIDS; Trametinib; AD.P53-DC; Cisplatin; YONDELIS; Doxorubicin; MK-1775; Paclitaxel; ZINC CHLORIDE; PD-0325901; PK11007; Temozolomide; TC-A2317; NU6027; DAB; IGF-1R antibody; PT2399; Ifosfamide; SELUMETINIB (AZD6244); EGFR antibody; IL-12; METHIMAZOLE; Cytarabine; CURAXIN CBLC102; Pramlintide; CAPECITABINE; Docetaxel; PROPYLTHIOURACIL…
chr17	7577130	7577130	A	G	exonic	TP53	tumor protein p53	nonsynonymous SNV	p.F270L		1	0	F270L	D	ID=COSM4070035,COSM44262,COSM165083,COSM4070034;OCCURENCE=1(bone),2(breast),1(haematopoietic_and_lymphoid_tissue),7(stomach),1(oesophagus),1(upper_aerodigestive_tract),4(large_intestine),1(central_nervous_system),1(biliary_tract)	Wee1 inhibitors, Chk1 inhibitors, kevetrin, APR-246, nutlins, gene therapy	CTX-1; Gemcitabine; GRANISETRON; epirubicin; TOPICAL CORTICOSTEROIDS; Trametinib; AD.P53-DC; Cisplatin; YONDELIS; Doxorubicin; MK-1775; Paclitaxel; ZINC CHLORIDE; PD-0325901; PK11007; Temozolomide; TC-A2317; NU6027; DAB; IGF-1R antibody; PT2399; Ifosfamide; SELUMETINIB (AZD6244); EGFR antibody; IL-12; METHIMAZOLE; Cytarabine; CURAXIN CBLC102; Pramlintide; CAPECITABINE; Docetaxel; PROPYLTHIOURACIL…
chr17	7577538	7577538	C	T	exonic	TP53	tumor protein p53	nonsynonymous SNV	p.R248Q	rs11540652	1	0	R248Q	D	ID=COSM99602,COSM99021,COSM99020,COSM3356964,COSM10662,COSM1640830;OCCURENCE=2(salivary_gland),1(pleura),11(vulva),44(ovary),7(bone),93(breast),5(NS),50(stomach),87(haematopoietic_and_lymphoid_tissue),1(soft_tissue),7(kidney),37(urinary_tract),22(pancreas),1(peritoneum),9(liver),1(genital_tract),54(oesophagus),2(adrenal_gland),1(pituitary),21(skin),27(prostate),35(lung),5(thyroid),4(cervix),48(up…	Wee1 inhibitors, Chk1 inhibitors, kevetrin, APR-246, nutlins, gene therapy	CTX-1; Gemcitabine; GRANISETRON; epirubicin; TOPICAL CORTICOSTEROIDS; Trametinib; AD.P53-DC; Cisplatin; YONDELIS; Doxorubicin; MK-1775; Paclitaxel; ZINC CHLORIDE; PD-0325901; PK11007; Temozolomide; TC-A2317; NU6027; DAB; IGF-1R antibody; PT2399; Ifosfamide; SELUMETINIB (AZD6244); EGFR antibody; IL-12; METHIMAZOLE; Cytarabine; CURAXIN CBLC102; Pramlintide; CAPECITABINE; Docetaxel; PROPYLTHIOURACIL…
chr17	7577539	7577539	G	A	exonic	TP53	tumor protein p53	nonsynonymous SNV	p.R248W	rs121912651	1	0	R248W	D	ID=COSM120006,COSM120005,COSM1640831,COSM10656,COSM3388183,COSM120007;OCCURENCE=1(pleura),4(vulva),36(ovary),2(bone),84(breast),1(penis),8(NS),44(haematopoietic_and_lymphoid_tissue),39(stomach),5(soft_tissue),11(kidney),22(urinary_tract),20(pancreas),5(liver),53(oesophagus),39(skin),7(prostate),25(lung),1(cervix),4(thyroid),35(upper_aerodigestive_tract),1(thymus),186(large_intestine),40(central_n…	Wee1 inhibitors, Chk1 inhibitors, kevetrin, APR-246, nutlins, gene therapy	CTX-1; Gemcitabine; GRANISETRON; epirubicin; TOPICAL CORTICOSTEROIDS; Trametinib; AD.P53-DC; Cisplatin; YONDELIS; Doxorubicin; MK-1775; Paclitaxel; ZINC CHLORIDE; PD-0325901; PK11007; Temozolomide; TC-A2317; NU6027; DAB; IGF-1R antibody; PT2399; Ifosfamide; SELUMETINIB (AZD6244); EGFR antibody; IL-12; METHIMAZOLE; Cytarabine; CURAXIN CBLC102; Pramlintide; CAPECITABINE; Docetaxel; PROPYLTHIOURACIL…
chr17	7578190	7578190	T	C	exonic	TP53	tumor protein p53	nonsynonymous SNV	p.Y220C	rs121912666	1	0	Y220C	D	ID=COSM99720,COSM99718,COSM3355993,COSM99719,COSM10758,COSM1644277;OCCURENCE=2(salivary_gland),1(vulva),46(ovary),2(bone),43(breast),1(NS),15(stomach),33(haematopoietic_and_lymphoid_tissue),10(soft_tissue),1(kidney),16(urinary_tract),10(pancreas),1(peritoneum),12(liver),37(oesophagus),2(skin),10(prostate),32(lung),31(upper_aerodigestive_tract),25(large_intestine),24(central_nervous_system),3(smal…	Wee1 inhibitors, Chk1 inhibitors, kevetrin, APR-246, nutlins, gene therapy	CTX-1; Gemcitabine; GRANISETRON; epirubicin; TOPICAL CORTICOSTEROIDS; Trametinib; AD.P53-DC; Cisplatin; YONDELIS; Doxorubicin; MK-1775; Paclitaxel; ZINC CHLORIDE; PD-0325901; PK11007; Temozolomide; TC-A2317; NU6027; DAB; IGF-1R antibody; PT2399; Ifosfamide; SELUMETINIB (AZD6244); EGFR antibody; IL-12; METHIMAZOLE; Cytarabine; CURAXIN CBLC102; Pramlintide; CAPECITABINE; Docetaxel; PROPYLTHIOURACIL…
chr17	7578265	7578265	A	T	exonic	TP53	tumor protein p53	nonsynonymous SNV	p.I195N	rs760043106	1	0	I195N	D	ID=COSM1738250,COSM1738251,COSM1738253,COSM1738252,COSM3403267,COSM44877,COSM1738254;OCCURENCE=13(ovary),2(breast),1(NS),1(stomach),2(haematopoietic_and_lymphoid_tissue),1(pancreas),1(liver),1(oesophagus),1(lung),2(large_intestine),2(central_nervous_system),1(biliary_tract)	Wee1 inhibitors, Chk1 inhibitors, kevetrin, APR-246, nutlins, gene therapy	CTX-1; Gemcitabine; GRANISETRON; epirubicin; TOPICAL CORTICOSTEROIDS; Trametinib; AD.P53-DC; Cisplatin; YONDELIS; Doxorubicin; MK-1775; Paclitaxel; ZINC CHLORIDE; PD-0325901; PK11007; Temozolomide; TC-A2317; NU6027; DAB; IGF-1R antibody; PT2399; Ifosfamide; SELUMETINIB (AZD6244); EGFR antibody; IL-12; METHIMAZOLE; Cytarabine; CURAXIN CBLC102; Pramlintide; CAPECITABINE; Docetaxel; PROPYLTHIOURACIL…
chr17	7578268	7578268	A	G	exonic	TP53	tumor protein p53	nonsynonymous SNV	p.L194P	rs1057519998	1	0	L194P	D	ID=COSM3675531,COSM3675532,COSM437525,COSM437528,COSM437527,COSM437526,COSM43827;OCCURENCE=2(breast),1(NS),2(stomach),1(soft_tissue),1(oesophagus),4(large_intestine)	Wee1 inhibitors, Chk1 inhibitors, kevetrin, APR-246, nutlins, gene therapy	CTX-1; Gemcitabine; GRANISETRON; epirubicin; TOPICAL CORTICOSTEROIDS; Trametinib; AD.P53-DC; Cisplatin; YONDELIS; Doxorubicin; MK-1775; Paclitaxel; ZINC CHLORIDE; PD-0325901; PK11007; Temozolomide; TC-A2317; NU6027; DAB; IGF-1R antibody; PT2399; Ifosfamide; SELUMETINIB (AZD6244); EGFR antibody; IL-12; METHIMAZOLE; Cytarabine; CURAXIN CBLC102; Pramlintide; CAPECITABINE; Docetaxel; PROPYLTHIOURACIL…
chr17	7578406	7578406	C	T	exonic	TP53	tumor protein p53	nonsynonymous SNV	p.R175H	rs28934578	1	0	R175H	D	ID=COSM10648,COSM3355994,COSM99022,COSM1640851,COSM99024,COSM99023,COSM99914;OCCURENCE=11(salivary_gland),2(pleura),9(vulva),73(ovary),5(bone),129(breast),1(penis),4(NS),88(stomach),57(haematopoietic_and_lymphoid_tissue),1(soft_tissue),18(kidney),30(urinary_tract),47(pancreas),1(peritoneum),11(liver),100(oesophagus),4(adrenal_gland),7(skin),8(prostate),23(lung),2(thyroid),4(cervix),79(upper_aerod…	Wee1 inhibitors, Chk1 inhibitors, kevetrin, APR-246, nutlins, gene therapy	CTX-1; Gemcitabine; GRANISETRON; epirubicin; TOPICAL CORTICOSTEROIDS; Trametinib; AD.P53-DC; Cisplatin; YONDELIS; Doxorubicin; MK-1775; Paclitaxel; ZINC CHLORIDE; PD-0325901; PK11007; Temozolomide; TC-A2317; NU6027; DAB; IGF-1R antibody; PT2399; Ifosfamide; SELUMETINIB (AZD6244); EGFR antibody; IL-12; METHIMAZOLE; Cytarabine; CURAXIN CBLC102; Pramlintide; CAPECITABINE; Docetaxel; PROPYLTHIOURACIL…
chr17	7578413	7578413	C	T	exonic	TP53	tumor protein p53	nonsynonymous SNV	p.V173M	rs876660754	1	0	V173M	D	ID=COSM3388205,COSM98966,COSM121041,COSM2744864,COSM11084,COSM98964,COSM98965;OCCURENCE=1(pleura),5(ovary),3(bone),7(breast),6(haematopoietic_and_lymphoid_tissue),6(stomach),2(soft_tissue),1(urinary_tract),3(kidney),3(pancreas),1(liver),9(oesophagus),1(skin),2(lung),7(upper_aerodigestive_tract),12(large_intestine),2(central_nervous_system)	Wee1 inhibitors, Chk1 inhibitors, kevetrin, APR-246, nutlins, gene therapy	CTX-1; Gemcitabine; GRANISETRON; epirubicin; TOPICAL CORTICOSTEROIDS; Trametinib; AD.P53-DC; Cisplatin; YONDELIS; Doxorubicin; MK-1775; Paclitaxel; ZINC CHLORIDE; PD-0325901; PK11007; Temozolomide; TC-A2317; NU6027; DAB; IGF-1R antibody; PT2399; Ifosfamide; SELUMETINIB (AZD6244); EGFR antibody; IL-12; METHIMAZOLE; Cytarabine; CURAXIN CBLC102; Pramlintide; CAPECITABINE; Docetaxel; PROPYLTHIOURACIL…
chr17	7578427	7578427	T	C	exonic	TP53	tumor protein p53	nonsynonymous SNV	p.H168R	rs867114783	1	0	H168R	D	ID=COSM43545,COSM3388211,COSM3388210,COSM3388209,COSM3388207,COSM3388208,COSM3388206;OCCURENCE=2(ovary),1(breast),2(stomach),2(haematopoietic_and_lymphoid_tissue),1(soft_tissue),1(pancreas),3(oesophagus),1(lung),3(large_intestine),1(central_nervous_system),1(endometrium)	Wee1 inhibitors, Chk1 inhibitors, kevetrin, APR-246, nutlins, gene therapy	CTX-1; Gemcitabine; GRANISETRON; epirubicin; TOPICAL CORTICOSTEROIDS; Trametinib; AD.P53-DC; Cisplatin; YONDELIS; Doxorubicin; MK-1775; Paclitaxel; ZINC CHLORIDE; PD-0325901; PK11007; Temozolomide; TC-A2317; NU6027; DAB; IGF-1R antibody; PT2399; Ifosfamide; SELUMETINIB (AZD6244); EGFR antibody; IL-12; METHIMAZOLE; Cytarabine; CURAXIN CBLC102; Pramlintide; CAPECITABINE; Docetaxel; PROPYLTHIOURACIL…
chr17	7578457	7578457	C	A	exonic	TP53	tumor protein p53	nonsynonymous SNV	p.R158L		1	0	R158L	D	ID=COSM99677,COSM99676,COSM99678,COSM99675,COSM10714,COSM1649374,COSM3958835;OCCURENCE=1(breast),3(haematopoietic_and_lymphoid_tissue),1(soft_tissue),3(urinary_tract),1(kidney),2(liver),11(oesophagus),50(lung),1(thyroid),4(upper_aerodigestive_tract),1(large_intestine),1(thymus),3(central_nervous_system)	Wee1 inhibitors, Chk1 inhibitors, kevetrin, APR-246, nutlins, gene therapy	CTX-1; Gemcitabine; GRANISETRON; epirubicin; TOPICAL CORTICOSTEROIDS; Trametinib; AD.P53-DC; Cisplatin; YONDELIS; Doxorubicin; MK-1775; Paclitaxel; ZINC CHLORIDE; PD-0325901; PK11007; Temozolomide; TC-A2317; NU6027; DAB; IGF-1R antibody; PT2399; Ifosfamide; SELUMETINIB (AZD6244); EGFR antibody; IL-12; METHIMAZOLE; Cytarabine; CURAXIN CBLC102; Pramlintide; CAPECITABINE; Docetaxel; PROPYLTHIOURACIL…
chr17	7578471	7578482	GGGCGGGGGTGT	-	exonic	TP53	tumor protein p53	nonframeshift deletion	p.T150_P153del	rs137852790	1	0	p.P153del		ID=COSM5010333,COSM5010331,COSM5010330,COSM5010329,COSM5010328,COSM43627,COSM5010332;OCCURENCE=1(upper_aerodigestive_tract),1(large_intestine)	Wee1 inhibitors, Chk1 inhibitors, kevetrin, APR-246, nutlins, gene therapy	CTX-1; Gemcitabine; GRANISETRON; epirubicin; TOPICAL CORTICOSTEROIDS; Trametinib; AD.P53-DC; Cisplatin; YONDELIS; Doxorubicin; MK-1775; Paclitaxel; ZINC CHLORIDE; PD-0325901; PK11007; Temozolomide; TC-A2317; NU6027; DAB; IGF-1R antibody; PT2399; Ifosfamide; SELUMETINIB (AZD6244); EGFR antibody; IL-12; METHIMAZOLE; Cytarabine; CURAXIN CBLC102; Pramlintide; CAPECITABINE; Docetaxel; PROPYLTHIOURACIL…
chr17	7578475	7578475	G	T	exonic	TP53	tumor protein p53	nonsynonymous SNV	p.P152Q		1	0	P152Q	D	ID=COSM3970374,COSM3970373,COSM3970376,COSM3970377,COSM3970375,COSM44613,COSM3970378;OCCURENCE=1(stomach),1(liver),2(oesophagus),1(large_intestine),1(central_nervous_system)	Wee1 inhibitors, Chk1 inhibitors, kevetrin, APR-246, nutlins, gene therapy	CTX-1; Gemcitabine; GRANISETRON; epirubicin; TOPICAL CORTICOSTEROIDS; Trametinib; AD.P53-DC; Cisplatin; YONDELIS; Doxorubicin; MK-1775; Paclitaxel; ZINC CHLORIDE; PD-0325901; PK11007; Temozolomide; TC-A2317; NU6027; DAB; IGF-1R antibody; PT2399; Ifosfamide; SELUMETINIB (AZD6244); EGFR antibody; IL-12; METHIMAZOLE; Cytarabine; CURAXIN CBLC102; Pramlintide; CAPECITABINE; Docetaxel; PROPYLTHIOURACIL…
chr17	7578478	7578478	G	T	exonic	TP53	tumor protein p53	nonsynonymous SNV	p.P151H	rs1057520000	1	0	P151H	D	ID=COSM3388218,COSM2744918,COSM259150,COSM259151,COSM259152,COSM11476,COSM259149;OCCURENCE=1(salivary_gland),3(ovary),5(breast),1(haematopoietic_and_lymphoid_tissue),1(stomach),1(soft_tissue),1(kidney),2(urinary_tract),1(pancreas),2(liver),4(oesophagus),2(skin),4(lung),3(upper_aerodigestive_tract),7(large_intestine)	Wee1 inhibitors, Chk1 inhibitors, kevetrin, APR-246, nutlins, gene therapy	CTX-1; Gemcitabine; GRANISETRON; epirubicin; TOPICAL CORTICOSTEROIDS; Trametinib; AD.P53-DC; Cisplatin; YONDELIS; Doxorubicin; MK-1775; Paclitaxel; ZINC CHLORIDE; PD-0325901; PK11007; Temozolomide; TC-A2317; NU6027; DAB; IGF-1R antibody; PT2399; Ifosfamide; SELUMETINIB (AZD6244); EGFR antibody; IL-12; METHIMAZOLE; Cytarabine; CURAXIN CBLC102; Pramlintide; CAPECITABINE; Docetaxel; PROPYLTHIOURACIL…
chr17	7578525	7578525	G	C	exonic	TP53	tumor protein p53	nonsynonymous SNV	p.C135W	rs1057519976	1	0	C135W	D	ID=COSM437602,COSM437604,COSM1640866,COSM437601,COSM437603,COSM4815153,COSM44219;OCCURENCE=1(pleura),4(ovary),8(breast),2(stomach),3(haematopoietic_and_lymphoid_tissue),1(urinary_tract),1(pancreas),2(oesophagus),1(adrenal_gland),2(prostate),1(lung),2(upper_aerodigestive_tract),2(large_intestine),5(central_nervous_system)	Wee1 inhibitors, Chk1 inhibitors, kevetrin, APR-246, nutlins, gene therapy	CTX-1; Gemcitabine; GRANISETRON; epirubicin; TOPICAL CORTICOSTEROIDS; Trametinib; AD.P53-DC; Cisplatin; YONDELIS; Doxorubicin; MK-1775; Paclitaxel; ZINC CHLORIDE; PD-0325901; PK11007; Temozolomide; TC-A2317; NU6027; DAB; IGF-1R antibody; PT2399; Ifosfamide; SELUMETINIB (AZD6244); EGFR antibody; IL-12; METHIMAZOLE; Cytarabine; CURAXIN CBLC102; Pramlintide; CAPECITABINE; Docetaxel; PROPYLTHIOURACIL…
chr17	7578534	7578534	C	A	exonic	TP53	tumor protein p53	nonsynonymous SNV	p.K132N	rs866775781	1	0	K132N	D	ID=COSM10991,COSM2157115,COSM213188,COSM213186,COSM3403291,COSM213187;OCCURENCE=6(ovary),6(breast),1(haematopoietic_and_lymphoid_tissue),1(urinary_tract),2(kidney),2(pancreas),3(liver),3(oesophagus),2(skin),8(lung),1(large_intestine),2(central_nervous_system),1(endometrium)	Wee1 inhibitors, Chk1 inhibitors, kevetrin, APR-246, nutlins, gene therapy	CTX-1; Gemcitabine; GRANISETRON; epirubicin; TOPICAL CORTICOSTEROIDS; Trametinib; AD.P53-DC; Cisplatin; YONDELIS; Doxorubicin; MK-1775; Paclitaxel; ZINC CHLORIDE; PD-0325901; PK11007; Temozolomide; TC-A2317; NU6027; DAB; IGF-1R antibody; PT2399; Ifosfamide; SELUMETINIB (AZD6244); EGFR antibody; IL-12; METHIMAZOLE; Cytarabine; CURAXIN CBLC102; Pramlintide; CAPECITABINE; Docetaxel; PROPYLTHIOURACIL…
chr19	11132513	11132513	C	T	exonic	SMARCA4	SWI/SNF related, matrix associated, actin dependent regulator of chromatin, subfamily a, member 4	nonsynonymous SNV	p.T910M		1	0	T910M	D	ID=COSM1226753,COSM88025;OCCURENCE=2(stomach),2(kidney),3(pancreas),1(lung),2(large_intestine),7(central_nervous_system),1(biliary_tract)	HDAC	VINORELBINE; CISPLATIN; PFI-3; RETINOIC ACID
chr19	18273784	18273784	G	A	exonic	PIK3R2	phosphoinositide-3-kinase regulatory subunit 2	nonsynonymous SNV	p.G373R	rs587776934	0	0	G373R	D	ID=COSM993028;OCCURENCE=1(stomach),1(oesophagus),1(lung),1(upper_aerodigestive_tract),1(testis),3(large_intestine),3(endometrium)	.	PF-4691502; OMIPALISIB; PKI-587; BGT-226; BKM120; LY-3023414; ZSTK-474; SF1126; GSK2126458; DACTOLISIB; TASELISIB; PWT-33587; BUPARLISIB HYDROCHLORIDE; AZD-6482; WX-037; PKI-587; SONOLISIB; APITOLISIB; PWT33597; PI-103; XL147; GDC-0980; BAY80-6946; XL-765; COPANLISIB; RG-7666; GSK-1059615; GDC-0941; BYL719; SOPHORETIN; DS-7423; Panulisib; PX-866; PILARALISIB; PA-799; PF-04691502; BEZ235; Puquitin…
chr2	198267483	198267483	C	T	exonic	SF3B1	splicing factor 3b subunit 1	nonsynonymous SNV	p.R625H	rs1057519961	0	1	R625H	D	ID=COSM255276;OCCURENCE=4(haematopoietic_and_lymphoid_tissue),2(liver),4(skin),1(meninges),25(eye),1(central_nervous_system),1(biliary_tract)	.	N/A; Spliceostatin A; E7107
chr22	24176338	24176338	C	T	exonic	SMARCB1	SWI/SNF related, matrix associated, actin dependent regulator of chromatin, subfamily b, member 1	nonsynonymous SNV	p.R386C		1	0	R377C	D	ID=COSM3972885,COSM3972886;OCCURENCE=1(haematopoietic_and_lymphoid_tissue),1(lung),2(large_intestine),1(central_nervous_system)	CDK inhibitors, Vismodegib, Hedgehog inhibitors, HDAC inhibitors	radiotherapy; EPZ-6438; Alvocidib; Tazemetostat; DZNeP; Vorinostat; PANOBINOSTAT; Fenretinide; Palbociclib; CFI-400945
chr3	12645693	12645693	G	A	exonic	RAF1	Raf-1 proto-oncogene, serine/threonine kinase	nonsynonymous SNV	p.S259F	rs397516827	0	1	S259F	D	ID=COSM1536534,COSM4318695;OCCURENCE=2(lung),1(upper_aerodigestive_tract)	Sorafenib, RAF inhibitors	SORAFENIB; REGORAFENIB; ARQ-736; SORAFENIB TOSYLATE; SORAFENIB; XL281; ISIS 5132; SORAFENIB; REGORAFENIB; SORAFENIB; C-RAF ANTISENSE OLIGONUCLEOTIDE; CEP-32496; MLN-2480; VEMURAFENIB; LGX818; GW5074; XL-281; ICO-007; CHIR-265; XL281; LY3009120; Sorafenib; Sorafenib; REGORAFENIB; ARQ736; SORAFENIB; ICO-007; L779450; ZM336372; SORAFENIB TOSYLATE; RG-7376; U0126; LY-3009120; PLX8394; SORAFENIB TOSYL…
chr3	30732969	30732969	C	T	exonic	TGFBR2	transforming growth factor beta receptor 2	nonsynonymous SNV	p.R553C	rs104893810	1	0	R553C	D	ID=COSM1650139,COSM583215;OCCURENCE=1(pancreas),1(oesophagus),1(lung),6(large_intestine),1(small_intestine)	.	COMPOUND 15B [PMID: 16539403]; COMPOUND 13A [PMID: 23639540]; TG-C; LY2109761; COMPOUND 13D [PMID: 23639540]
chr3	49412898	49412898	T	C	exonic	RHOA	ras homolog family member A	nonsynonymous SNV	p.Y42C	rs1057519954	0	1	Y42C	D	ID=COSM2849892;OCCURENCE=1(breast),17(stomach),1(large_intestine)	.
chr4	55599340	55599340	T	G	exonic	KIT	KIT proto-oncogene receptor tyrosine kinase	nonsynonymous SNV	p.N822K	rs121913514	0	1	N822K	D	ID=COSM1322;OCCURENCE=1(NS),24(haematopoietic_and_lymphoid_tissue),6(soft_tissue),6(genital_tract),2(skin),3(testis)	Imatinib, Sunitinib, Novel KIT Inhibitors	IMATINIB; PAZOPANIB HCL; G007-LK; 4'-N-BENZOYLSTAUROSPORINE; AST-487; TANDUTINIB; KI-20227; Sorafenib; MIDOSTAURIN; SU-14813; SUNITINIB; PLX3397; MOTESANIB; SORAFENIB; Regorafenib; FAMITINIB; DASATINIB; AKN-028; OSI-930; Sunitinib; ENMD-2076; CRENOLANIB; Imatinib; MIDOSTAURIN; Imatinib; QUIZARTINIB; Sunitinib; Dasatinib; NILOTINIB; AS703569; Quizartinib; SUNITINIB MALATE; AXITINIB; JNJ-28312141; …	Thymic Tumor,EL:2A:Sunitinib, Sorafenib(25592632, 19461405, 20571495) ; Melanoma,EL:2A:Imatinib(23775962, 18235121, 12181401, 21642685, 16098458, 15451219) ; Gastrointestinal Stromal Tumor,EL:1:Regorafenib, Imatinib, Sunitinib(18235121, 12181401, 17046465, 19282169, 25641662, 16098458, 15451219, 23177515) ; Gastrointestinal Stromal Tumor,EL:2A:Sorafenib(23140824, 22270258) ; Thymic Tumor,EL:2A:Su…
chr7	55233043	55233043	G	T	exonic	EGFR	epidermal growth factor receptor	nonsynonymous SNV	p.G598V	rs139236063	0	1	G598V	D	ID=COSM4967213,COSM21690,COSM1187304;OCCURENCE=1(lung),35(central_nervous_system)	Erlotinib, Gefitinib, EGFR Inhibitors	JAK3 INHIBITOR II; PANITUMUMAB; INC280; AZD-4769; EPIGEN; POZIOTINIB; LAPATINIB; DACOMITINIB; PANITUMUMAB; AZD8931; PANITUMUMAB; PANITUMUMAB; XL647; Erlotinib; ERLOTINIB; AP26113; AKOS004227608; SYM004; NIMOTUZUMAB; TAK-285; VANDETANIB; Durvalumab; AV-412; BMS-599626; ARRY-334543; DACOMITINIB; ERLOTINIB HYDROCHLORIDE; RO5083945; BMS-599626; poziotinib; MK2206; EGFR INHIBITOR; VANDETANIB; MP-412; …
chr7	140453136	140453136	A	T	exonic	BRAF	B-Raf proto-oncogene, serine/threonine kinase	nonsynonymous SNV	p.V600E	rs113488022	0	1	V600E	D	ID=COSM476;OCCURENCE=9(salivary_gland),249(ovary),15(breast),18(bone),1014(NS),4(stomach),671(haematopoietic_and_lymphoid_tissue),7(urinary_tract),8(kidney),53(soft_tissue),12(pancreas),18(liver),4(genital_tract),2(oesophagus),1(autonomic_ganglia),4(adrenal_gland),90(pituitary),5705(skin),3(prostate),127(lung),3(meninges),13498(thyroid),12(upper_aerodigestive_tract),8(testis),95(eye),4934(large_i…	Vemurafenib, Dabrafenib, RAF inhibitors, MEK inhibitors	AMG 232; PLX3397; PLX7904; PLX8394; Pimasertib; PANITUMUMAB; GSK2126458; INU-152; RAF265; Nivolumab; Panitumumab; DASATINIB; LGX-806; CCT196969; Selumetinib; PIMASERTIB; MK2206; SHP099; Trametinib; GDC-0941; GSK 2118436; AZ628; BGB-283; CGM097; VEMURAFENIB; MEK162; R7204; RO5212054; PAC-1; Cediranib; GDC-0973; CI-1040; REGORAFENIB; GDC-0879; RAF265; REGORAFENIB; ZELBORAF; MEK162; Venetoclax; Tuba…	All Tumors,EL:4:LTT462, BVD-523, KO-947()
chr7	140453149	140453149	C	G	exonic	BRAF	B-Raf proto-oncogene, serine/threonine kinase	nonsynonymous SNV	p.G596R	rs121913361	0	1	G596R	D	ID=COSM469;OCCURENCE=2(urinary_tract),2(skin),2(lung),4(large_intestine)	Vemurafenib, Dabrafenib, RAF inhibitors, MEK inhibitors	AMG 232; PLX3397; PLX7904; PLX8394; Pimasertib; PANITUMUMAB; GSK2126458; INU-152; RAF265; Nivolumab; Panitumumab; DASATINIB; LGX-806; CCT196969; Selumetinib; PIMASERTIB; MK2206; SHP099; Trametinib; GDC-0941; GSK 2118436; AZ628; BGB-283; CGM097; VEMURAFENIB; MEK162; R7204; RO5212054; PAC-1; Cediranib; GDC-0973; CI-1040; REGORAFENIB; GDC-0879; RAF265; REGORAFENIB; ZELBORAF; MEK162; Venetoclax; Tuba…	All Tumors,EL:4:LTT462, BVD-523, KO-947()
chr7	140453154	140453154	T	C	exonic	BRAF	B-Raf proto-oncogene, serine/threonine kinase	nonsynonymous SNV	p.D594G	rs121913338	0	1	D594G	D	ID=COSM467;OCCURENCE=1(salivary_gland),2(ovary),1(breast),3(NS),3(stomach),7(haematopoietic_and_lymphoid_tissue),2(urinary_tract),3(pancreas),10(skin),1(prostate),10(lung),1(upper_aerodigestive_tract),1(eye),29(large_intestine),2(central_nervous_system),4(endometrium)	Vemurafenib, Dabrafenib, RAF inhibitors, MEK inhibitors	AMG 232; PLX3397; PLX7904; PLX8394; Pimasertib; PANITUMUMAB; GSK2126458; INU-152; RAF265; Nivolumab; Panitumumab; DASATINIB; LGX-806; CCT196969; Selumetinib; PIMASERTIB; MK2206; SHP099; Trametinib; GDC-0941; GSK 2118436; AZ628; BGB-283; CGM097; VEMURAFENIB; MEK162; R7204; RO5212054; PAC-1; Cediranib; GDC-0973; CI-1040; REGORAFENIB; GDC-0879; RAF265; REGORAFENIB; ZELBORAF; MEK162; Venetoclax; Tuba…	All Tumors,EL:4:LTT462, BVD-523, KO-947()
chr7	140481411	140481411	C	A	exonic	BRAF	B-Raf proto-oncogene, serine/threonine kinase	nonsynonymous SNV	p.G466V	rs121913351	0	1	G466V	D	ID=COSM451;OCCURENCE=2(ovary),1(breast),1(NS),1(haematopoietic_and_lymphoid_tissue),3(skin),16(lung),1(cervix),1(large_intestine),1(small_intestine)	Vemurafenib, Dabrafenib, RAF inhibitors, MEK inhibitors	AMG 232; PLX3397; PLX7904; PLX8394; Pimasertib; PANITUMUMAB; GSK2126458; INU-152; RAF265; Nivolumab; Panitumumab; DASATINIB; LGX-806; CCT196969; Selumetinib; PIMASERTIB; MK2206; SHP099; Trametinib; GDC-0941; GSK 2118436; AZ628; BGB-283; CGM097; VEMURAFENIB; MEK162; R7204; RO5212054; PAC-1; Cediranib; GDC-0973; CI-1040; REGORAFENIB; GDC-0879; RAF265; REGORAFENIB; ZELBORAF; MEK162; Venetoclax; Tuba…	All Tumors,EL:4:LTT462, BVD-523, KO-947()
chr7	151845367	151845367	G	A	exonic	KMT2C	lysine methyltransferase 2C	nonsynonymous SNV	p.R4606C		1	0	R4549C	D	ID=COSM245710,COSM245709;OCCURENCE=1(pancreas),1(skin),1(prostate),2(large_intestine)	.
chr9	80409488	80409488	T	A	exonic	GNAQ	G protein subunit alpha q	nonsynonymous SNV	p.Q209L	rs121913492	0	1	Q209L	D	ID=COSM28757;OCCURENCE=1(NS),9(soft_tissue),126(skin),26(meninges),99(eye)	MAPK pathway inhibitors	Verteporfin; Everolimus; Selumetinib; CGM097; U0126; MEK162; Refametinib; PLX4720; Enzastaurin; AEB071; GSK2126458; NAV-2729; SELUMETINIB; PD0325901; Trametinib; AEB071; Selumetinib; TAK-733; PD-0325901
chrX	70339254	70339254	G	C	exonic	MED12	mediator complex subunit 12	nonsynonymous SNV	p.G44A	rs199469672	0	1	G44A	D	ID=COSM3786773,COSM1736588,COSM131595;OCCURENCE=22(breast),84(soft_tissue),1(pancreas),1(prostate),1(central_nervous_system)

## Sheet: Cosmic_Annotated_Mutations
Chr	Start	End	Ref	Alt	Type	Symbol	Genename	Exonic Function	AAChange	snp150	TSG	OG	HS	Condel	Cosmic84	Target	DGIdb	OncoKB
chr1	957584	957584	C	T	exonic	AGRN	agrin	nonsynonymous SNV	p.R69W		0	0	0	N	ID=COSM4637004;OCCURENCE=1(large_intestine)	.
chr1	1230854	1230854	C	T	exonic	ACAP3	ArfGAP with coiled-coil, ankyrin repeat and PH domains 3	nonsynonymous SNV	p.A596T		0	0	0	N	ID=COSM1600663,COSM1600664;OCCURENCE=2(liver)	.
chr1	1560262	1560262	G	A	exonic	MIB2	mindbomb E3 ubiquitin protein ligase 2	stopgain	p.W284X		0	0	0		ID=COSM5377862,COSM5377863;OCCURENCE=1(skin)	.
chr1	1560406	1560406	C	T	exonic	MIB2	mindbomb E3 ubiquitin protein ligase 2	nonsynonymous SNV	p.R303C	rs776810755	0	0	0	D	ID=COSM6712446,COSM6712447;OCCURENCE=1(large_intestine)	.
chr1	2702423	2702423	C	T	exonic	TTC34	tetratricopeptide repeat domain 34	nonsynonymous SNV	p.E161K		0	0	0	D	ID=COSM5593649;OCCURENCE=1(skin)	.
chr1	3639950	3639950	G	A	exonic	TP73	tumor protein p73	nonsynonymous SNV	p.V217M		0	0	0	D	ID=COSM6859133,COSM6859134;OCCURENCE=1(biliary_tract)	.	UVB; GM-CSF; ANTIOXIDANT; TAZAROTENE; CARBOPLATIN; RETINOIC ACID; VEGF; NERVE GROWTH FACTOR; EGCG; VCR; ARABINOFURANOSYLCYTOSINE; CDDP
chr1	3649503	3649503	C	T	exonic	TP73	tumor protein p73	nonsynonymous SNV	p.R591C	rs201509863	0	0	0	D	ID=COSM1242950;OCCURENCE=1(oesophagus)	.	UVB; GM-CSF; ANTIOXIDANT; TAZAROTENE; CARBOPLATIN; RETINOIC ACID; VEGF; NERVE GROWTH FACTOR; EGCG; VCR; ARABINOFURANOSYLCYTOSINE; CDDP
chr1	3679786	3679786	G	A	exonic	CCDC27	coiled-coil domain containing 27	nonsynonymous SNV	p.G357R		0	0	0	N	ID=COSM3865478;OCCURENCE=1(skin)	.
chr1	3703844	3703844	C	T	exonic	LRRC47	leucine rich repeat containing 47	nonsynonymous SNV	p.E216K	rs767177931	0	0	0	N	ID=COSM4967065;OCCURENCE=1(central_nervous_system)	.
chr1	3809544	3809544	C	T	exonic	C1orf174	chromosome 1 open reading frame 174	nonsynonymous SNV	p.R11Q	rs150305532	0	0	0	N	ID=COSM2167401;OCCURENCE=1(large_intestine)	.
chr1	7723779	7723779	G	A	exonic	CAMTA1	calmodulin binding transcription activator 1	nonsynonymous SNV	p.G391E	rs762445994	0	0	0	N	ID=COSM5983530,COSM5983531;OCCURENCE=1(upper_aerodigestive_tract)	.
chr1	7890053	7890053	G	A	exonic	PER3	period circadian regulator 3	nonsynonymous SNV	p.A1016T	rs1776342	0	0	0	N	ID=COSM1134947;OCCURENCE=3(breast),1(NS),2(haematopoietic_and_lymphoid_tissue),2(kidney),1(pancreas),6(liver),1(oesophagus),3(thyroid),3(upper_aerodigestive_tract),5(large_intestine),1(central_nervous_system)	.
chr1	8420827	8420827	G	A	exonic	RERE	arginine-glutamic acid dipeptide repeats	nonsynonymous SNV	p.R914W	rs745616537	0	0	0	N	ID=COSM6383931;OCCURENCE=1(thyroid)	.
chr1	9305366	9305366	G	A	exonic	H6PD	hexose-6-phosphate dehydrogenase/glucose 1-dehydrogenase	nonsynonymous SNV	p.E136K	rs772471798	0	0	0	N	ID=COSM1185296;OCCURENCE=1(lung)	.
chr1	9770520	9770520	C	T	exonic	PIK3CD	phosphatidylinositol-4,5-bisphosphate 3-kinase catalytic subunit delta	nonsynonymous SNV	p.P3S	rs750425882	0	1	0	D	ID=COSM5906660,COSM5906659;OCCURENCE=1(skin)	.	ALPELISIB; NVP-BEZ242; RP5264; PWT33597; IDELALISIB; INK-128; IC-87114; IDELALISIB; AZD8835; PICTILISIB; ZSTK474; PWT-33587; SERABELISIB; BKM120; APITOLISIB; PKI-587; ZSTK474; GSK-2269557; LY 294002; AZD-6482; PP121; CUDC-907; GSK2126458; PILARALISIB; GDC-0980; N/A; AMG319; RECILISIB; INCB-040093; OMIPALISIB; BEZ235; PX-866; DS-7423; ME-401; GDC-0941; LY3023414; COMPOUND 82 [PMID: 21332118]; PKI-…
chr1	9784136	9784136	C	T	exonic	PIK3CD	phosphatidylinositol-4,5-bisphosphate 3-kinase catalytic subunit delta	stopgain	p.R926X		0	1	0		ID=COSM4010788,COSM4010789;OCCURENCE=1(stomach),1(large_intestine)	.	ALPELISIB; NVP-BEZ242; RP5264; PWT33597; IDELALISIB; INK-128; IC-87114; IDELALISIB; AZD8835; PICTILISIB; ZSTK474; PWT-33587; SERABELISIB; BKM120; APITOLISIB; PKI-587; ZSTK474; GSK-2269557; LY 294002; AZD-6482; PP121; CUDC-907; GSK2126458; PILARALISIB; GDC-0980; N/A; AMG319; RECILISIB; INCB-040093; OMIPALISIB; BEZ235; PX-866; DS-7423; ME-401; GDC-0941; LY3023414; COMPOUND 82 [PMID: 21332118]; PKI-…
chr1	11082185	11082185	C	T	exonic	TARDBP	TAR DNA binding protein	nonsynonymous SNV	p.A240V		0	0	0	D	ID=COSM893654;OCCURENCE=1(endometrium)	.
chr1	11728866	11728866	A	G	exonic	FBXO6	F-box protein 6	nonsynonymous SNV	p.M51V	rs138203471	0	0	0	N	ID=COSM2178568;OCCURENCE=1(skin),1(large_intestine)	.
chr1	12017932	12017932	C	T	exonic	PLOD1	procollagen-lysine,2-oxoglutarate 5-dioxygenase 1	nonsynonymous SNV	p.R306C		0	0	0	N	ID=COSM1600637,COSM1600638,COSM3704883;OCCURENCE=2(liver)	.
chr1	12337914	12337914	G	T	exonic	VPS13D	vacuolar protein sorting 13 homolog D	nonsynonymous SNV	p.Q1423H		0	0	0	D	ID=COSM6346238;OCCURENCE=1(liver)	.
chr1	12393408	12393408	A	G	exonic	VPS13D	vacuolar protein sorting 13 homolog D	nonsynonymous SNV	p.T2805A		0	0	0	D	ID=COSM6820443;OCCURENCE=1(large_intestine)	.
chr1	12885090	12885090	T	G	exonic	PRAMEF11	PRAME family member 11	unknown	p.N341H	rs200105596	0	0	0	N	ID=COSM462788;OCCURENCE=1(kidney)	.
chr1	13497626	13497626	A	G	exonic	PRAMEF17	PRAME family member 17	nonsynonymous SNV	p.Q308R	rs200005698	0	0	0	N	ID=COSM4219195;OCCURENCE=1(thyroid),4(upper_aerodigestive_tract)	.
chr1	13940872	13940872	G	A	exonic	PDPN	podoplanin	nonsynonymous SNV	p.V226I	rs377220172	0	0	0	N	ID=COSM259009;OCCURENCE=1(stomach),1(large_intestine)	.
chr1	16525645	16525645	C	T	exonic	ARHGEF19	Rho guanine nucleotide exchange factor 19	nonsynonymous SNV	p.G751S	rs776756182	0	0	0	D	ID=COSM4024711;OCCURENCE=1(stomach)	.
chr1	16577692	16577692	C	T	exonic	FBXO42	F-box protein 42	nonsynonymous SNV	p.V543M	rs141274605	0	0	0	N	ID=COSM4684007;OCCURENCE=1(large_intestine)	.
chr1	16725845	16725845	C	T	exonic	SPATA21	spermatogenesis associated 21	nonsynonymous SNV	p.G449E		0	0	0	D	ID=COSM2185578,COSM3477767;OCCURENCE=1(skin)	.
chr1	17090929	17090929	G	A	exonic	MST1L	macrophage stimulating 1 like	nonsynonymous SNV	p.S16L	rs755621497	0	0	0		ID=COSM4225712;OCCURENCE=1(pancreas),1(skin)	.
chr1	17396636	17396636	C	T	exonic	PADI2	peptidyl arginine deiminase 2	nonsynonymous SNV	p.A571T	rs140945853	0	0	0	N	ID=COSM2075924,COSM4225978;OCCURENCE=1(liver)	.
chr1	17401395	17401395	C	T	exonic	PADI2	peptidyl arginine deiminase 2	nonsynonymous SNV	p.R502Q	rs780536674	0	0	0	N	ID=COSM4225987,COSM2075933;OCCURENCE=1(pancreas)	.
chr1	17548898	17548898	C	T	exonic	PADI1	peptidyl arginine deiminase 1	nonsynonymous SNV	p.P69L	rs138279447	0	0	0	N	ID=COSM6332650;OCCURENCE=1(liver),1(large_intestine)	.	O-F-AMIDINE
chr1	18691991	18691991	G	A	exonic	IGSF21	immunoglobin superfamily member 21	nonsynonymous SNV	p.R272H	rs141820553	0	0	0	N	ID=COSM2123412;OCCURENCE=3(large_intestine)	.
chr1	18692186	18692186	C	T	exonic	IGSF21	immunoglobin superfamily member 21	nonsynonymous SNV	p.T337M	rs374130273	0	0	0	N	ID=COSM6684540;OCCURENCE=1(large_intestine)	.
chr1	18808328	18808328	C	A	exonic	KLHDC7A	kelch domain containing 7A	nonsynonymous SNV	p.L285I		0	0	0	D	ID=COSM901244;OCCURENCE=1(endometrium)	.
chr1	19027178	19027178	G	A	exonic	PAX7	paired box 7	nonsynonymous SNV	p.R273H	rs915768373	0	0	0	D	ID=COSM182355,COSM5844854;OCCURENCE=1(NS)	.
chr1	20827616	20827616	C	T	exonic	MUL1	mitochondrial E3 ubiquitin protein ligase 1	nonsynonymous SNV	p.R209H		0	0	0	N	ID=COSM4704129;OCCURENCE=2(large_intestine)	.
chr1	20998509	20998509	G	A	exonic	KIF17	kinesin family member 17	nonsynonymous SNV	p.R882C	rs199941525	0	0	0	D	ID=COSM1929275;OCCURENCE=1(lung)	.
chr1	21031072	21031072	G	A	exonic	KIF17	kinesin family member 17	nonsynonymous SNV	p.R331W	rs139912475	0	0	0	D	ID=COSM2151840;OCCURENCE=2(central_nervous_system)	.
chr1	21050638	21050638	C	T	exonic	SH2D5	SH2 domain containing 5	nonsynonymous SNV	p.R246H	rs761752861	0	0	0	D	ID=COSM247299;OCCURENCE=1(prostate)	.
chr1	22175269	22175269	G	A	exonic	HSPG2	heparan sulfate proteoglycan 2	nonsynonymous SNV	p.P2535L		0	0	0	D	ID=COSM3483923;OCCURENCE=1(skin)	.	CSA; PALIFERMIN
chr1	22188275	22188275	C	T	exonic	HSPG2	heparan sulfate proteoglycan 2	nonsynonymous SNV	p.G1644S	rs759470183	0	0	0	D	ID=COSM5554751;OCCURENCE=1(prostate)	.	CSA; PALIFERMIN
chr1	22456174	22456174	C	T	exonic	WNT4	Wnt family member 4	nonsynonymous SNV	p.R83Q	rs368808392	0	0	0	D	ID=COSM1601703,COSM1601702;OCCURENCE=2(liver)	.
chr1	22922618	22922618	G	A	exonic	EPHA8	EPH receptor A8	nonsynonymous SNV	p.A573T		0	0	0	N	ID=COSM4029301;OCCURENCE=1(stomach)	.	COMPOUND 66 [PMID: 19788238]; GENISTEIN; PHYTOESTROGEN; VANDETANIB; CHEMOTHERAPEUTIC AGENT
chr1	23240246	23240246	A	-	exonic	EPHB2	EPH receptor B2	frameshift deletion	p.K1020fs	rs563863657	0	0	0		ID=COSM4681360;OCCURENCE=1(breast),4(large_intestine)	.	VANDETANIB; COMPOUND 66 [PMID: 19788238]
chr1	24385442	24385442	G	A	exonic	MYOM3	myomesin 3	nonsynonymous SNV	p.P1344L	rs961510485	0	0	0	N	ID=COSM6062417,COSM6062416;OCCURENCE=1(lung)	.
chr1	24669205	24669205	G	A	exonic	GRHL3	grainyhead like transcription factor 3	nonsynonymous SNV	p.D410N	rs745328429	0	0	0	N	ID=COSM4688482,COSM4688481;OCCURENCE=2(large_intestine)	.
chr1	24979064	24979064	C	T	exonic	SRRM1	serine and arginine repetitive matrix 1	nonsynonymous SNV	p.R289W		0	0	0	N	ID=COSM4235884,COSM2234270;OCCURENCE=1(large_intestine)	.
chr1	25229113	25229113	G	A	exonic	RUNX3	runt related transcription factor 3	nonsynonymous SNV	p.R264C	rs746125249	0	0	0	D	ID=COSM1127049,COSM1127048;OCCURENCE=1(prostate)	.	LEUCOVORIN; IRINOTECAN
chr1	26369161	26369161	C	T	exonic	SLC30A2	solute carrier family 30 member 2	nonsynonymous SNV	p.S204N		0	0	0	N	ID=COSM1341297;OCCURENCE=1(large_intestine)	.
chr1	26507045	26507045	C	T	exonic	CNKSR1	connector enhancer of kinase suppressor of Ras 1	nonsynonymous SNV	p.R52W	rs201898585	0	0	0	N	ID=COSM3400636;OCCURENCE=1(large_intestine),1(central_nervous_system)	.
chr1	26610960	26610960	C	T	exonic	UBXN11	UBX domain protein 11	nonsynonymous SNV	p.R289H	rs190924615	0	0	0	N	ID=COSM5352716;OCCURENCE=2(large_intestine)	.
chr1	26671971	26671971	T	-	exonic	CRYBG2	crystallin beta-gamma domain containing 2	frameshift deletion	p.K393fs	rs747248693	0	0	0		ID=COSM3729850,COSM1341341;OCCURENCE=1(stomach),1(peritoneum),17(large_intestine),1(biliary_tract)	.
chr1	27101054	27101054	C	T	exonic	ARID1A	AT-rich interaction domain 1A	stopgain	p.R1446X		1	0	0		ID=COSM907726;OCCURENCE=7(stomach),1(pancreas),3(oesophagus),1(large_intestine),2(endometrium)	.	DASATINIB; Trastuzumab; GSK126
chr1	27632795	27632795	C	T	exonic	WDTC1	WD and tetratricopeptide repeats 1	nonsynonymous SNV	p.T652M		0	0	0	N	ID=COSM2235856;OCCURENCE=1(prostate)	.
chr1	27720703	27720703	G	A	exonic	GPR3	G protein-coupled receptor 3	nonsynonymous SNV	p.R134H	rs372066479	0	0	0	D	ID=COSM4031120;OCCURENCE=1(stomach),1(large_intestine)	.	DIPHENYLENEIODONIUM CHLORIDE; SPHINGOSINE 1-PHOSPHATE
chr1	27736582	27736582	C	T	exonic	WASF2	WAS protein family member 2	nonsynonymous SNV	p.G315R		0	0	0	N	ID=COSM6821208;OCCURENCE=1(large_intestine)	.
chr1	27876646	27876646	G	A	exonic	AHDC1	AT-hook DNA binding motif containing 1	nonsynonymous SNV	p.R661C		0	0	0	N	ID=COSM6596646;OCCURENCE=1(large_intestine)	.
chr1	28598251	28598251	C	T	exonic	SESN2	sestrin 2	stopgain	p.R75X	rs760115188	0	0	0		ID=COSM426028;OCCURENCE=1(breast)	.
chr1	31425154	31425154	T	C	exonic	PUM1	pumilio RNA binding family member 1	nonsynonymous SNV	p.N919S	rs144369611	0	0	0	D	ID=COSM4031337;OCCURENCE=1(stomach),1(large_intestine)	.
chr1	32043047	32043047	C	-	exonic	TINAGL1	tubulointerstitial nephritis antigen like 1	frameshift deletion	p.P101fs		0	0	0		ID=COSM2077170,COSM4335253;OCCURENCE=1(breast)	.
chr1	32050498	32050498	G	A	exonic	TINAGL1	tubulointerstitial nephritis antigen like 1	nonsynonymous SNV	p.D240N	rs368629759	0	0	0	D	ID=COSM4733808;OCCURENCE=2(large_intestine)	.
chr1	32503579	32503579	C	T	exonic	KHDRBS1	KH RNA binding domain containing, signal transduction associated 1	nonsynonymous SNV	p.A350V		0	0	0	N	ID=COSM6369630;OCCURENCE=1(thyroid)	.
chr1	33058972	33058972	G	A	exonic	ZBTB8A	zinc finger and BTB domain containing 8A	nonsynonymous SNV	p.R147H	rs146695968	0	0	0	N	ID=COSM4415057;OCCURENCE=1(haematopoietic_and_lymphoid_tissue),1(skin)	.
chr1	33235363	33235363	C	T	exonic	KIAA1522	KIAA1522	nonsynonymous SNV	p.P226S		0	0	0	N	ID=COSM5525146,COSM5525145;OCCURENCE=1(NS)	.
chr1	33415340	33415340	G	A	exonic	RNF19B	ring finger protein 19B	nonsynonymous SNV	p.P224L		0	0	0	D	ID=COSM6503665,COSM6503664;OCCURENCE=1(cervix)	.
chr1	33480162	33480162	G	A	exonic	AK2	adenylate kinase 2	stopgain	p.H153H	rs200924521	0	0	0		ID=COSM185874,COSM4864211,COSM908386;OCCURENCE=2(large_intestine),1(endometrium)	.
chr1	34102044	34102044	C	T	exonic	CSMD2	CUB and Sushi multiple domains 2	nonsynonymous SNV	p.E1629K	rs749349455	0	0	0	N	ID=COSM2079302,COSM2079303;OCCURENCE=2(skin)	.
chr1	34128652	34128652	C	T	exonic	CSMD2	CUB and Sushi multiple domains 2	nonsynonymous SNV	p.V1365M	rs142169949	0	0	0	N	ID=COSM4031689,COSM4031688;OCCURENCE=1(stomach),2(liver)	.
chr1	34238292	34238292	G	A	exonic	CSMD2	CUB and Sushi multiple domains 2	nonsynonymous SNV	p.S575F	rs867069952	0	0	0	D	ID=COSM2079564,COSM2079565,COSM4237188;OCCURENCE=1(large_intestine)	.
chr1	35227333	35227333	C	T	exonic	GJB4	gap junction protein beta 4	nonsynonymous SNV	p.R160C	rs148710003	0	0	0	D	ID=COSM5461559;OCCURENCE=1(large_intestine)	.	OCTANOL; FLUFENAMIC ACID; CA2+; CARBENOXOLONE
chr1	35365852	35365852	C	-	exonic	DLGAP3	DLG associated protein 3	frameshift deletion	p.G377fs		0	0	0		ID=COSM1342085;OCCURENCE=1(ovary),1(stomach),5(large_intestine)	.
chr1	35881234	35881234	C	T	exonic	ZMYM4	zinc finger MYM-type containing 4	nonsynonymous SNV	p.R1410W	rs191217255	0	0	0	D	ID=COSM6827554,COSM33366;OCCURENCE=2(large_intestine)	.
chr1	36026633	36026633	C	T	exonic	NCDN	neurochondrin	nonsynonymous SNV	p.S294F	rs368464438	0	0	0	N	ID=COSM5535248,COSM5535249;OCCURENCE=1(NS)	.
chr1	36563658	36563658	C	T	exonic	COL8A2	collagen type VIII alpha 2 chain	nonsynonymous SNV	p.A542T	rs773405905	0	0	0	D	ID=COSM3705816;OCCURENCE=2(liver),1(thyroid),1(large_intestine)	.
chr1	36859493	36859493	G	A	exonic	LSM10	LSM10, U7 small nuclear RNA associated	nonsynonymous SNV	p.R80C	rs749640330	0	0	0	D	ID=COSM1342314;OCCURENCE=1(large_intestine)	.
chr1	36938271	36938271	G	-	exonic	CSF3R	colony stimulating factor 3 receptor	frameshift deletion	p.M231fs		0	0	0		ID=COSM4614729,COSM4614728;OCCURENCE=2(large_intestine)	.	FILGRAMSTIM; PEGFILGRASTIM; INS-19; GLYCOPEG-GCSF; G-CSF; FILGRASTIM; FILGRASTIM; N/A; MAXY-G34; PEGFILGRASTIM; Ruxolitinib; PEGFILGRASTIM; PEGFILGRASTIM; BALUGRASTIM; FILGRASTIM; RUXOLITINIB; LIPEGFILGRASTIM; INS-20; Dasatinib
chr1	40433346	40433346	G	A	exonic	MFSD2A	major facilitator superfamily domain containing 2A	nonsynonymous SNV	p.R366Q	rs540449746	0	0	0	D	ID=COSM4877686;OCCURENCE=1(prostate)	.
chr1	42915659	42915659	C	T	exonic	ZMYND12	zinc finger MYND-type containing 12	nonsynonymous SNV	p.R61H	rs767153865	0	0	0	N	ID=COSM909642;OCCURENCE=1(prostate),1(large_intestine),1(endometrium)	.
chr1	43885956	43885956	G	A	exonic	SZT2	SZT2, KICSTOR complex subunit	nonsynonymous SNV	p.R408Q		0	0	0		ID=COSM6577892;OCCURENCE=1(breast)	.
chr1	44083455	44083455	G	A	exonic	PTPRF	protein tyrosine phosphatase, receptor type F	nonsynonymous SNV	p.R1415H	rs370637531	0	0	0	D	ID=COSM909883;OCCURENCE=1(endometrium)	.	ERLOTINIB HYDROCHLORIDE; ILLUDALIC ACID
chr1	44386218	44386218	G	A	exonic	ST3GAL3	ST3 beta-galactoside alpha-2,3-sialyltransferase 3	nonsynonymous SNV	p.R365Q	rs137939894	0	0	0	N	ID=COSM909917;OCCURENCE=1(endometrium)	.
chr1	44684413	44684413	C	T	exonic	DMAP1	DNA methyltransferase 1 associated protein 1	nonsynonymous SNV	p.R236W	rs368524464	0	0	0	D	ID=COSM4652497,COSM4652496;OCCURENCE=1(large_intestine)	.
chr1	45268776	45268776	G	A	exonic	PLK3	polo like kinase 3	nonsynonymous SNV	p.R300Q	rs549813850	0	0	0	N	ID=COSM6750223,COSM6750222;OCCURENCE=1(large_intestine)	.	NMS-P937; BI-2536
chr1	45271911	45271911	C	T	exonic	TCTEX1D4	Tctex1 domain containing 4	nonsynonymous SNV	p.E144K	rs372753194	0	0	0	N	ID=COSM1172151;OCCURENCE=1(oesophagus)	.
chr1	46295200	46295200	C	T	exonic	MAST2	microtubule associated serine/threonine kinase 2	stopgain	p.R139X		0	0	0		ID=COSM4444268;OCCURENCE=1(large_intestine)	.
chr1	47407056	47407056	C	T	exonic	CYP4A11	cytochrome P450 family 4 subfamily A member 11	nonsynonymous SNV	p.G17E		0	0	0	D	ID=COSM3490433;OCCURENCE=1(skin)	.
chr1	47533301	47533301	C	T	exonic	CYP4Z1	cytochrome P450 family 4 subfamily Z member 1	nonsynonymous SNV	p.P47S	rs868399298	0	0	0	D	ID=COSM3490461;OCCURENCE=5(skin)	.
chr1	50884590	50884590	G	T	exonic	DMRTA2	DMRT like family A2	nonsynonymous SNV	p.A459E		0	0	0	N	ID=COSM6540442;OCCURENCE=1(lung)	.
chr1	51760119	51760119	G	A	exonic	TTC39A	tetratricopeptide repeat domain 39A	nonsynonymous SNV	p.R440W	rs746931176	0	0	0	D	ID=COSM6811152,COSM6811151;OCCURENCE=1(large_intestine)	.
chr1	52306066	52306066	T	A	exonic	NRDC	nardilysin convertase	nonsynonymous SNV	p.E154D	rs72663147	0	0	0	N	ID=COSM3751276,COSM249022;OCCURENCE=1(pancreas),2(skin),4(thyroid),3(large_intestine)	.
chr1	53446158	53446158	G	A	exonic	SCP2	sterol carrier protein 2	nonsynonymous SNV	p.D306N	rs1033094856	0	0	0	D	ID=COSM910736;OCCURENCE=1(endometrium)	.
chr1	54433509	54433509	C	T	exonic	LRRC42	leucine rich repeat containing 42	nonsynonymous SNV	p.P395L		0	0	0	N	ID=COSM1213853;OCCURENCE=1(large_intestine)	.
chr1	55139420	55139420	G	A	exonic	MROH7	maestro heat like repeat family member 7	nonsynonymous SNV	p.R581Q	rs773181857	0	0	0	N	ID=COSM6715229,COSM6715227,COSM6715228;OCCURENCE=1(large_intestine)	.
chr1	55253393	55253393	G	A	exonic	TTC22	tetratricopeptide repeat domain 22	nonsynonymous SNV	p.R244C	rs569564877	0	0	0	N	ID=COSM6427549,COSM6427550;OCCURENCE=1(thyroid)	.
chr1	55518416	55518416	C	T	exonic	PCSK9	proprotein convertase subtilisin/kexin type 9	nonsynonymous SNV	p.R251C	rs778900671	0	0	0	D	ID=COSM302887;OCCURENCE=1(large_intestine),1(central_nervous_system)	.	EVOLOCUMAB; SPC5001; SPC5001; ALN-PCS; BOCOCIZUMAB; BOCOCIZUMAB; ALIROCUMAB; ALN-PCS01; BMS-PCSK9; EVOLOCUMAB; Alirocumab; RG-7652; PCSK9 INHIBITOR; REGN727
chr1	55559693	55559693	G	A	exonic	USP24	ubiquitin specific peptidase 24	nonsynonymous SNV	p.R2091W		0	0	0	N	ID=COSM4009020,COSM4009019;OCCURENCE=1(stomach)	.
chr1	55624658	55624658	G	A	exonic	USP24	ubiquitin specific peptidase 24	nonsynonymous SNV	p.R374C	rs374277857	0	0	0	N	ID=COSM2194574,COSM2194575;OCCURENCE=2(stomach)	.
chr1	60328470	60328470	G	A	exonic	HOOK1	hook microtubule tethering protein 1	nonsynonymous SNV	p.R516H	rs765087108	0	0	0	N	ID=COSM6681534;OCCURENCE=1(large_intestine)	.
chr1	62579908	62579908	G	C	exonic	PATJ	PATJ, crumbs cell polarity complex component	nonsynonymous SNV	p.V1549L		0	0	0	N	ID=COSM3705961,COSM1602604;OCCURENCE=2(liver)	.
chr1	62740192	62740192	C	T	exonic	KANK4	KN motif and ankyrin repeat domains 4	nonsynonymous SNV	p.G195D		0	0	0	N	ID=COSM5719294;OCCURENCE=4(skin)	.
chr1	64608210	64608210	C	T	exonic	ROR1	receptor tyrosine kinase like orphan receptor 1	nonsynonymous SNV	p.R351C	rs867500485	0	0	0	D	ID=COSM228794;OCCURENCE=4(skin)	.
chr1	67185072	67185072	G	A	exonic	SGIP1	SH3 domain GRB2 like endophilin interacting protein 1	nonsynonymous SNV	p.G607R		0	0	0	D	ID=COSM6220901,COSM6220904,COSM6220903,COSM6220902;OCCURENCE=1(prostate)	.
chr1	70486765	70486765	G	A	exonic	LRRC7	leucine rich repeat containing 7	nonsynonymous SNV	p.E462K		0	0	0	N	ID=COSM3934817;OCCURENCE=1(oesophagus)	.
chr1	70504032	70504032	C	T	exonic	LRRC7	leucine rich repeat containing 7	nonsynonymous SNV	p.S804L		0	0	0	N	ID=COSM6704036;OCCURENCE=1(large_intestine)	.
chr1	76354975	76354975	C	T	exonic	MSH4	mutS homolog 4	nonsynonymous SNV	p.A716V		0	0	0	N	ID=COSM4477370,COSM4477369;OCCURENCE=1(skin)	.
chr1	78392480	78392480	G	A	exonic	NEXN	nexilin F-actin binding protein	nonsynonymous SNV	p.R256Q	rs748921688	0	0	0	D	ID=COSM4984624,COSM4984623;OCCURENCE=1(haematopoietic_and_lymphoid_tissue),2(oesophagus)	.
chr1	78560771	78560771	G	A	exonic	GIPC2	GIPC PDZ domain containing family member 2	nonsynonymous SNV	p.E188K	rs138753471	0	0	0	N	ID=COSM4898851;OCCURENCE=2(skin)	.
chr1	84880304	84880304	C	T	exonic	DNASE2B	deoxyribonuclease 2 beta	nonsynonymous SNV	p.S280F		0	0	0	N	ID=COSM5381607,COSM5381608;OCCURENCE=1(skin)	.
chr1	85014546	85014546	C	T	exonic	SPATA1	spermatogenesis associated 1	stopgain	p.R364X		0	0	0		ID=COSM4409331;OCCURENCE=1(oesophagus)	.
chr1	85510989	85510989	G	A	exonic	MCOLN3	mucolipin 3	nonsynonymous SNV	p.R19C	rs369130424	0	0	0	D	ID=COSM2243877,COSM912641,COSM4144205;OCCURENCE=1(thyroid),1(endometrium)	.	SF-11; SN-2; SF-21; SN-1
chr1	86964413	86964413	G	A	exonic	CLCA1	chloride channel accessory 1	nonsynonymous SNV	p.D758N	rs570108676	0	0	0	D	ID=COSM3419538;OCCURENCE=2(skin),1(large_intestine)	.	TALNIFLUMATE
chr1	89655791	89655791	C	T	exonic	GBP4	guanylate binding protein 4	nonsynonymous SNV	p.R376K		0	0	0	N	ID=COSM6064594;OCCURENCE=1(lung)	.
chr1	90179160	90179160	G	A	exonic	LRRC8C	leucine rich repeat containing 8 VRAC subunit C	nonsynonymous SNV	p.R344H		0	0	0	N	ID=COSM172203;OCCURENCE=2(pancreas),1(large_intestine),1(endometrium)	.
chr1	90473107	90473107	G	A	exonic	ZNF326	zinc finger protein 326	nonsynonymous SNV	p.R138H	rs201312408	0	0	0	N	ID=COSM4010510;OCCURENCE=1(stomach),1(large_intestine)	.
chr1	91727836	91727836	A	-	exonic	HFM1	HFM1, ATP dependent DNA helicase homolog	frameshift deletion	p.F1400fs	rs774112248	0	0	0		ID=COSM2259614;OCCURENCE=4(large_intestine)	.
chr1	92515886	92515886	G	A	exonic	EPHX4	epoxide hydrolase 4	nonsynonymous SNV	p.R206Q	rs745837639	0	0	0	N	ID=COSM4010592;OCCURENCE=1(stomach)	.
chr1	93594899	93594899	C	T	exonic	MTF2	metal response element binding transcription factor 2	nonsynonymous SNV	p.P352S		0	0	0	D	ID=COSM4010648;OCCURENCE=1(stomach)	.
chr1	94481340	94481340	G	T	exonic	ABCA4	ATP binding cassette subfamily A member 4	nonsynonymous SNV	p.S1756Y		0	0	0	D	ID=COSM913443;OCCURENCE=1(endometrium)	.	STARGEN
chr1	94497573	94497573	C	T	exonic	ABCA4	ATP binding cassette subfamily A member 4	nonsynonymous SNV	p.V1297I	rs200753584	0	0	0	N	ID=COSM5952225;OCCURENCE=1(oesophagus)	.	STARGEN
chr1	94998711	94998711	G	A	exonic	F3	coagulation factor III, tissue factor	nonsynonymous SNV	p.R176W	rs767150963	0	0	0	N	ID=COSM5625877;OCCURENCE=1(oesophagus)	.
chr1	103544263	103544263	C	A	exonic	COL11A1	collagen type XI alpha 1 chain	nonsynonymous SNV	p.A147S		0	0	0	N	ID=COSM5048674,COSM5048675;OCCURENCE=1(oesophagus)	.	OCRIPLASMIN; COLLAGENASE CLOSTRIDIUM HISTOLYTICUM
chr1	103544311	103544311	C	A	exonic	COL11A1	collagen type XI alpha 1 chain	nonsynonymous SNV	p.V131F		0	0	0	D	ID=COSM6120238,COSM6120239;OCCURENCE=1(lung)	.	OCRIPLASMIN; COLLAGENASE CLOSTRIDIUM HISTOLYTICUM
chr1	109607186	109607186	G	A	exonic	TAF13	TATA-box binding protein associated factor 13	stopgain	p.R112X		0	0	0		ID=COSM1332398;OCCURENCE=1(large_intestine)	.
chr1	110038468	110038468	C	T	exonic	CYB561D1	cytochrome b561 family member D1	nonsynonymous SNV	p.H115Y		0	0	0	N	ID=COSM5620614;OCCURENCE=1(haematopoietic_and_lymphoid_tissue)	.
chr1	110561031	110561031	G	A	exonic	AHCYL1	adenosylhomocysteinase like 1	nonsynonymous SNV	p.R387H	rs768042207	0	0	0	D	ID=COSM2118294;OCCURENCE=1(stomach)	.
chr1	111060811	111060811	C	T	exonic	KCNA10	potassium voltage-gated channel subfamily A member 10	nonsynonymous SNV	p.R200H	rs755748044	0	0	0	D	ID=COSM33068;OCCURENCE=4(liver),1(skin),2(upper_aerodigestive_tract),3(large_intestine)	.	CHARYBDOTOXIN; FAMPRIDINE; NERISPIRDINE; PIMOZIDE; VERAPAMIL; DALFAMPRIDINE; TEDISAMIL; KETOCONAZOLE; BA2+; GUANIDINE HYDROCHLORIDE; TETRAETHYLAMMONIUM
chr1	111147106	111147106	C	T	exonic	KCNA2	potassium voltage-gated channel subfamily A member 2	nonsynonymous SNV	p.R100Q		0	0	0	D	ID=COSM1332617;OCCURENCE=1(large_intestine)	.	DALFAMPRIDINE; MARGATOXIN; TEDISAMIL; 6-OHDA; ANANDAMIDE; STZ; GUANIDINE HYDROCHLORIDE; NERISPIRDINE
chr1	111861257	111861257	C	A	exonic	CHIA	chitinase, acidic	nonsynonymous SNV	p.A291D		0	0	0	N	ID=COSM423438,COSM423439;OCCURENCE=1(breast)	.
chr1	114357561	114357561	C	T	exonic	PTPN22	protein tyrosine phosphatase, non-receptor type 22	nonsynonymous SNV	p.G797E		0	0	0	D	ID=COSM4537197;OCCURENCE=1(skin)	.
chr1	114357562	114357562	C	T	exonic	PTPN22	protein tyrosine phosphatase, non-receptor type 22	nonsynonymous SNV	p.G797R		0	0	0	D	ID=COSM4537167;OCCURENCE=1(skin)	.
chr1	114640467	114640467	C	T	exonic	SYT6	synaptotagmin 6	nonsynonymous SNV	p.R466H	rs148168972	0	0	0	D	ID=COSM5377252,COSM5377253;OCCURENCE=1(skin)	.
chr1	115142883	115142883	G	A	exonic	DENND2C	DENN domain containing 2C	nonsynonymous SNV	p.R683W	rs571559588	0	0	0	N	ID=COSM4020891,COSM4020890;OCCURENCE=1(stomach)	.
chr1	115142943	115142943	G	A	exonic	DENND2C	DENN domain containing 2C	stopgain	p.R663X		0	0	0		ID=COSM6642314,COSM6642313;OCCURENCE=1(large_intestine)	.
chr1	115256529	115256529	T	C	exonic	NRAS	NRAS proto-oncogene, GTPase	nonsynonymous SNV	p.Q61R	rs11554290	0	1	Q61R	D	ID=COSM584;OCCURENCE=5(ovary),1(bone),7(breast),110(NS),1(stomach),177(haematopoietic_and_lymphoid_tissue),1(kidney),5(soft_tissue),9(urinary_tract),3(pancreas),3(liver),1(genital_tract),7(adrenal_gland),578(skin),13(lung),1(cervix),11(meninges),449(thyroid),5(upper_aerodigestive_tract),3(testis),1(thymus),10(eye),61(large_intestine),6(central_nervous_system),1(small_intestine),7(biliary_tract),4…	Vemurafenib, Dabrafenib, RAF inhibitors, MEK inhibitors	Cetuximab; BYL719; SELUMETINIB (AZD6244); Everolimus; Cetuximab; MK2206; CC-90003; Radioiodine Uptake Therapy; Panitumumab; Selumetinib; BINIMETINIB (MEK162); NS1; PRECLINICAL; BKM120; METFORMIN; SHP099; MEK; LAK; Cetuximab; MK-1775; Trametinib; Obatoclax; MEK162; PANITUMUMAB; GDC0879; BINIMETINIB; VEMURAFENIB; TPA; PF-05212384; Atezolizumab; CCT196969; Trametinib; PD-0325901; Vemurafenib; inhibi…	Melanoma,EL:3A:Binimetinib, Binimetinib + Ribociclib(16273091, 28284557, 22983396) ; Thyroid Cancer,EL:3A:Selumetinib + Radioiodine Uptake Therapy(22105174, 23406027) ; Colorectal Cancer,EL:R1:Panitumumab, Cetuximab(20619739, 24024844, 25110411, 24024839)
chr1	115258747	115258747	C	A	exonic	NRAS	NRAS proto-oncogene, GTPase	nonsynonymous SNV	p.G12V	rs121913237	0	1	G12V	D	ID=COSM566;OCCURENCE=1(ovary),92(haematopoietic_and_lymphoid_tissue),8(skin),1(prostate),2(thyroid),1(testis),14(large_intestine)	Vemurafenib, Dabrafenib, RAF inhibitors, MEK inhibitors	Cetuximab; BYL719; SELUMETINIB (AZD6244); Everolimus; Cetuximab; MK2206; CC-90003; Radioiodine Uptake Therapy; Panitumumab; Selumetinib; BINIMETINIB (MEK162); NS1; PRECLINICAL; BKM120; METFORMIN; SHP099; MEK; LAK; Cetuximab; MK-1775; Trametinib; Obatoclax; MEK162; PANITUMUMAB; GDC0879; BINIMETINIB; VEMURAFENIB; TPA; PF-05212384; Atezolizumab; CCT196969; Trametinib; PD-0325901; Vemurafenib; inhibi…	Melanoma,EL:3A:Binimetinib, Binimetinib + Ribociclib(16273091, 28284557, 22983396) ; Thyroid Cancer,EL:3A:Selumetinib + Radioiodine Uptake Therapy(22105174, 23406027) ; Colorectal Cancer,EL:R1:Panitumumab, Cetuximab(20619739, 24024844, 25110411, 24024839)
chr1	117150617	117150617	A	G	exonic	IGSF3	immunoglobulin superfamily member 3	nonsynonymous SNV	p.I390T	rs61786588	0	0	0	N	ID=COSM4142210,COSM4142211;OCCURENCE=1(bone),1(skin),3(thyroid),4(large_intestine)	.
chr1	120166407	120166407	C	T	exonic	ZNF697	zinc finger protein 697	nonsynonymous SNV	p.A187T		0	0	0	N	ID=COSM6540797;OCCURENCE=1(lung)	.
chr1	144886256	144886256	G	A	exonic	PDE4DIP	phosphodiesterase 4D interacting protein	nonsynonymous SNV	p.P1130L	rs782531503	0	0	0	N	ID=COSM2231085,COSM2231086,COSM2231084;OCCURENCE=2(large_intestine)	.
chr1	145323666	145323666	A	G	exonic	NBPF10	NBPF member 10	nonsynonymous SNV	p.D1168G	rs782536243	0	0	0	N	ID=COSM462844;OCCURENCE=1(breast),1(kidney),3(prostate),1(large_intestine),1(endometrium)	.
chr1	145368473	145368473	G	C	exonic	NBPF9	NBPF member 9	unknown	p.R3484P	rs1043749	0	0	0	N	ID=COSM4591463,COSM4591464;OCCURENCE=1(lung),7(upper_aerodigestive_tract),1(large_intestine)	.
chr1	147380743	147380743	G	A	exonic	GJA8	gap junction protein alpha 8	nonsynonymous SNV	p.V221M		0	0	0	D	ID=COSM2121869;OCCURENCE=1(biliary_tract)	.	CA2+; FLUFENAMIC ACID; OCTANOL; CARBENOXOLONE
chr1	147380779	147380779	C	T	exonic	GJA8	gap junction protein alpha 8	nonsynonymous SNV	p.R233W	rs140512440	0	0	0	D	ID=COSM1560016;OCCURENCE=2(liver),1(prostate),2(large_intestine)	.	CA2+; FLUFENAMIC ACID; OCTANOL; CARBENOXOLONE
chr1	149949378	149949378	G	A	exonic	OTUD7B	OTU deubiquitinase 7B	nonsynonymous SNV	p.A23V	rs782468732	0	0	0	N	ID=COSM5843525;OCCURENCE=1(NS)	.
chr1	150236210	150236210	G	T	exonic	CA14	carbonic anhydrase 14	nonsynonymous SNV	p.G294C		0	0	0	N	ID=COSM2181835;OCCURENCE=1(large_intestine)	.	METHAZOLAMIDE; BRINZOLAMIDE; CHLORTHALIDONE; ETHOXZOLAMIDE; DORZOLAMIDE; ETHOXZOLAMIDE; ACETAZOLAMIDE
chr1	151107307	151107307	G	A	exonic	SEMA6C	semaphorin 6C	nonsynonymous SNV	p.S542F		0	0	0	N	ID=COSM5584050,COSM5584049;OCCURENCE=1(skin)	.
chr1	151234659	151234659	C	T	exonic	PSMD4	proteasome 26S subunit, non-ATPase 4	nonsynonymous SNV	p.R17W	rs755580240	0	0	0	D	ID=COSM895745;OCCURENCE=1(lung),1(large_intestine),1(endometrium)	.	PROTEASOME INHIBITOR; CARFILZOMIB; BORTEZOMIB; CARFILZOMIB; OPROZOMIB; IXAZOMIB CITRATE; TALAZOPARIB; BORTEZOMIB
chr1	152081245	152081245	C	T	exonic	TCHH	trichohyalin	nonsynonymous SNV	p.R1483H		0	0	0	N	ID=COSM2153349;OCCURENCE=2(central_nervous_system)	.
chr1	152193032	152193032	G	T	exonic	HRNR	hornerin	nonsynonymous SNV	p.S358Y		0	0	0	N	ID=COSM386118;OCCURENCE=1(lung)	.
chr1	152278705	152278705	C	T	exonic	FLG	filaggrin	nonsynonymous SNV	p.R2886H	rs369659011	0	0	0	N	ID=COSM3399725;OCCURENCE=2(central_nervous_system)	.	PROPIONIBACTERIUM ACNES
chr1	152279231	152279231	C	T	exonic	FLG	filaggrin	nonsynonymous SNV	p.G2711R		0	0	0	N	ID=COSM2185117;OCCURENCE=1(cervix)	.	PROPIONIBACTERIUM ACNES
chr1	152326903	152326903	G	A	exonic	FLG2	filaggrin family member 2	nonsynonymous SNV	p.S1120L	rs772274448	0	0	0	N	ID=COSM896181;OCCURENCE=1(skin),1(endometrium)	.
chr1	152733140	152733140	C	T	exonic	KPRP	keratinocyte proline rich protein	nonsynonymous SNV	p.P359L		0	0	0	N	ID=COSM4762819;OCCURENCE=1(stomach)	.
chr1	152748983	152748983	G	A	exonic	LCE1F	late cornified envelope 1F	nonsynonymous SNV	p.V46I	rs553837591	0	0	0	N	ID=COSM1738560;OCCURENCE=1(haematopoietic_and_lymphoid_tissue),1(pancreas),1(prostate),2(large_intestine)	.
chr1	152749037	152749042	GGTGGT	-	exonic	LCE1F	late cornified envelope 1F	nonframeshift deletion	p.G65_G66del	rs149277953	0	0	0		ID=COSM150848;OCCURENCE=1(haematopoietic_and_lymphoid_tissue),1(stomach),1(liver),1(upper_aerodigestive_tract),2(large_intestine)	.
chr1	152785167	152785167	G	A	exonic	LCE1B	late cornified envelope 1B	nonsynonymous SNV	p.R82H	rs777212372	0	0	0	N	ID=COSM4807855;OCCURENCE=1(pancreas),1(large_intestine)	.
chr1	153659751	153659751	C	T	exonic	NPR1	natriuretic peptide receptor 1	nonsynonymous SNV	p.R671C	rs766674601	0	0	0	D	ID=COSM3732573;OCCURENCE=1(stomach),1(liver)	.	NESIRITIDE; ERYTHRITYL TETRANITRATE; NESIRITIDE; CENDERITIDE; NITRIC OXIDE; ISOSORBIDE DINITRATE; NESIRITIDE; ISOSORBIDE DINITRATE; PL-3994; ERYTHRITYL TETRANITRATE; ISOSORBIDE MONONITRATE; NITROPRUSSIDE; NITROPRUSSIDE; ISOSORBIDE-5-MONONITRATE; ISOSORBIDE DINITRATE; ATACIGUAT; NITROGLYCERIN; NITROGLYCERIN; NITROGLYCERIN; CARDIODILATIN; ERYTHRITYL TETRANITRATE; ISOSORBIDE-5-MONONITRATE; NITRIC OX…
chr1	154493878	154493878	C	T	exonic	TDRD10	tudor domain containing 10	stopgain	p.R98X	rs141785787	0	0	0		ID=COSM6799017,COSM6799018;OCCURENCE=1(large_intestine)	.
chr1	154842199	154842199	-	GCTGCTGCTGCTGCT	exonic	KCNN3	potassium calcium-activated channel subfamily N member 3	nonframeshift insertion	p.P81delinsQQQQQP	rs3831942	0	0	0		ID=COSM3685920;OCCURENCE=1(thyroid),11(large_intestine)	.
chr1	154842199	154842199	-	GCTGCTGCTGCT	exonic	KCNN3	potassium calcium-activated channel subfamily N member 3	nonframeshift insertion	p.P81delinsQQQQP	rs3831942	0	0	0		ID=COSM896660;OCCURENCE=1(haematopoietic_and_lymphoid_tissue),1(skin),3(thyroid),10(large_intestine),1(endometrium)	.
chr1	154987219	154987219	G	A	exonic	ZBTB7B	zinc finger and BTB domain containing 7B	nonsynonymous SNV	p.R62H		0	0	0	D	ID=COSM896709;OCCURENCE=1(endometrium)	.
chr1	155166832	155166832	C	T	exonic	THBS3	thrombospondin 3	nonsynonymous SNV	p.R891Q	rs775866099	0	0	0	D	ID=COSM4733529;OCCURENCE=2(large_intestine)	.
chr1	155239463	155239463	C	T	exonic	CLK2	CDC like kinase 2	nonsynonymous SNV	p.R72Q		0	0	0	N	ID=COSM4836020;OCCURENCE=1(liver),1(cervix)	.	COMPOUND 17 [PMID: 23642479]; ML315
chr1	156834552	156834552	C	T	exonic	NTRK1	neurotrophic receptor tyrosine kinase 1	nonsynonymous SNV	p.A107V	rs540521894	0	1	0	N	ID=COSM20674,COSM1334979;OCCURENCE=1(ovary),1(lung),1(large_intestine)	.	GAMMA-INTERFERON; COMPOUND 1D [PMID: 21493067]; LESTAURTINIB; IMATINIB; CYCLOPHOSPHAMIDE; CXB909; PHENYLEPHRINE; COMPOUND 2C [PMID: 24900538]; ANTIESTROGEN; LESTAURTINIB; INTERFERON GAMMA; TAM; PLX-7486; ENMD-2076; AZD-6918; Crizotinib; MILCICLIB; ENTRECTINIB; GLUCOCORTICOID; ARRY-470; WORTMANNIN; AZD1332; 17 BETA-ESTRADIOL; IL-6; MIM-D3; ANDROGENS; Larotrectinib; CEP-11981; DOVITINIB; GNF-5837; …
chr1	158059594	158059594	C	A	exonic	KIRREL		nonsynonymous SNV	p.P436T	rs921973633	0	0	0	N	ID=COSM4696290,COSM4696291,COSM4696292;OCCURENCE=2(large_intestine)	.
chr1	158435743	158435743	G	A	exonic	OR10K1	olfactory receptor family 10 subfamily K member 1	nonsynonymous SNV	p.R131H	rs571768202	0	0	0	N	ID=COSM529631;OCCURENCE=1(haematopoietic_and_lymphoid_tissue),1(prostate),1(lung),1(large_intestine)	.
chr1	158450313	158450313	G	A	exonic	OR10R2	olfactory receptor family 10 subfamily R member 2	nonsynonymous SNV	p.E216K	rs553674516	0	0	0	N	ID=COSM1218508;OCCURENCE=1(NS),1(skin),1(large_intestine)	.
chr1	158576883	158576883	G	A	exonic	OR10Z1	olfactory receptor family 10 subfamily Z member 1	nonsynonymous SNV	p.A219T	rs761084191	0	0	0	N	ID=COSM897769;OCCURENCE=1(endometrium)	.
chr1	158815563	158815563	G	A	exonic	MNDA	myeloid cell nuclear differentiation antigen	nonsynonymous SNV	p.D253N	rs774562125	0	0	0	N	ID=COSM1986991;OCCURENCE=1(pancreas),1(skin),1(large_intestine)	.
chr1	159176211	159176211	C	T	exonic	ACKR1	atypical chemokine receptor 1 (Duffy blood group)	nonsynonymous SNV	p.H330Y		0	0	0	N	ID=COSM3476460,COSM3476461;OCCURENCE=2(skin)	.
chr1	159277645	159277645	C	T	exonic	FCER1A	Fc fragment of IgE receptor Ia	nonsynonymous SNV	p.L233F		0	0	0	N	ID=COSM3863212;OCCURENCE=1(skin)	.	BENZYLPENICILLOYL POLYLYSINE; R112; BENZYLPENICILLOYL POLYLYSINE; IGE HEAVY CHAIN; OMALIZUMAB
chr1	160012241	160012241	G	A	exonic	KCNJ10	potassium voltage-gated channel subfamily J member 10	nonsynonymous SNV	p.R28W	rs780870986	0	0	0	N	ID=COSM3934177,COSM3934178;OCCURENCE=1(oesophagus),1(large_intestine)	.	MINOXIDIL; GLYCODIAZINE; GLIQUIDONE; ACETOHEXAMIDE; GLIPIZIDE; GLISOXEPIDE; TOLAZAMIDE; NATEGLINIDE; CHLORPROPAMIDE; MITIGLINIDE; NORTRIPTYLINE
chr1	160164868	160164868	G	A	exonic	CASQ1	calsequestrin 1	nonsynonymous SNV	p.D178N		0	0	0	D	ID=COSM5010640;OCCURENCE=1(kidney)	.
chr1	160340732	160340732	C	T	exonic	NHLH1	nescient helix-loop-helix 1	nonsynonymous SNV	p.R71C	rs755184068	0	0	0	D	ID=COSM1626576;OCCURENCE=1(liver)	.
chr1	161160935	161160935	C	T	exonic	ADAMTS4	ADAM metallopeptidase with thrombospondin type 1 motif 4	nonsynonymous SNV	p.R836K	rs11807350	0	0	0	N	ID=COSM388446;OCCURENCE=1(lung)	.	COMPOUND 15C [PMID: 21536437]; CHONDROITIN SULFATE
chr1	161166024	161166024	G	A	exonic	ADAMTS4	ADAM metallopeptidase with thrombospondin type 1 motif 4	nonsynonymous SNV	p.R343W	rs773010345	0	0	0	D	ID=COSM5031678,COSM5031679;OCCURENCE=1(pancreas),1(oesophagus)	.	COMPOUND 15C [PMID: 21536437]; CHONDROITIN SULFATE
chr1	161496144	161496144	G	A	exonic	HSPA6	heat shock protein family A (Hsp70) member 6	nonsynonymous SNV	p.E566K	rs750741969	0	0	0	N	ID=COSM288956;OCCURENCE=1(large_intestine),1(endometrium)	.
chr1	161518297	161518297	G	T	exonic	FCGR3A	Fc fragment of IgG receptor IIIa	nonsynonymous SNV	p.A114D	rs52820103	0	0	0	N	ID=COSM6358946;OCCURENCE=1(prostate)	.	PROTEASE INHIBITORS; LIF; CYCLOSPORINE; ANGIOGENESIS INHIBITOR; H2O2; BRM; INDOMETHACIN; IL-8; FLT3L; RECOMBINANT STEM CELL FACTOR; THALIDOMIDE; TRASTUZUMAB; CA19-9 ANTIGEN; POLY I:C; FAS LIGAND; IL-2; SALINE; GELDANAMYCIN; EPO; PUROMYCIN; DPPE; MAFOSFAMIDE; DOXORUBICIN; BESTATIN; PENICILLIN; OPIOID; CHONDROITIN SULFATE; PMA; IL-18; CIMETIDINE; FENTANYL; IMMUNOSUPPRESSIVE; ARA-C; EOTAXIN; LACTULO…
chr1	161677088	161677088	C	T	exonic	FCRLA	Fc receptor like A	nonsynonymous SNV	p.L29F		0	0	0	N	ID=COSM3477307,COSM3477309,COSM3477308;OCCURENCE=2(skin)	.
chr1	161789549	161789549	G	A	exonic	ATF6	activating transcription factor 6	nonsynonymous SNV	p.E346K	rs182139828	0	0	0	N	ID=COSM5623739;OCCURENCE=1(oesophagus)	.
chr1	161953983	161953983	G	A	exonic	OLFML2B	olfactomedin like 2B	nonsynonymous SNV	p.R580C		0	0	0	D	ID=COSM3477351;OCCURENCE=1(stomach),2(skin),1(large_intestine)	.
chr1	165182996	165182996	C	T	exonic	LMX1A	LIM homeobox transcription factor 1 alpha	nonsynonymous SNV	p.G184E		0	0	0	D	ID=COSM3477603;OCCURENCE=2(skin)	.
chr1	165218846	165218846	C	T	exonic	LMX1A	LIM homeobox transcription factor 1 alpha	nonsynonymous SNV	p.E99K	rs202040732	0	0	0	N	ID=COSM898888;OCCURENCE=1(endometrium)	.
chr1	165380313	165380313	C	T	exonic	RXRG	retinoid X receptor gamma	nonsynonymous SNV	p.R219Q	rs780792192	0	0	0	D	ID=COSM4555490;OCCURENCE=1(skin)	.	ALITRETINOIN; BEXAROTENE; ADAPALENE; TRETINOIN; ALITRETIONINE; IRX-4204; ACITRETIN; MOFAROTENE; BEXAROTENE; BEXAROTENE; ALITRETINOIN; ETRETINATE; ADAPALENE; BEXAROTENE; TRETINOIN
chr1	165721402	165721402	C	T	exonic	TMCO1	transmembrane and coiled-coil domains 1	nonsynonymous SNV	p.R138Q	rs763875549	0	0	0	D	ID=COSM898951,COSM4785871;OCCURENCE=3(large_intestine),1(endometrium)	.
chr1	168161459	168161459	A	G	exonic	TIPRL	TOR signaling pathway regulator	nonsynonymous SNV	p.H177R	rs927889477	0	0	0		ID=COSM6235583;OCCURENCE=1(liver)	.
chr1	168274366	168274366	C	T	exonic	TBX19	T-box 19	nonsynonymous SNV	p.S283L	rs758895157	0	0	0	D	ID=COSM6285261;OCCURENCE=1(liver)	.
chr1	169293678	169293678	G	A	exonic	NME7	NME/NM23 family member 7	stopgain	p.R22X	rs781410209	0	0	0		ID=COSM899219;OCCURENCE=1(large_intestine),1(endometrium)	.
chr1	169790867	169790867	T	-	exonic	C1orf112	chromosome 1 open reading frame 112	frameshift deletion	p.F252fs		0	0	0		ID=COSM5121683,COSM1336125;OCCURENCE=6(large_intestine)	.
chr1	171162616	171162616	G	A	exonic	FMO2	flavin containing monooxygenase 2	unknown	p.R92K		0	0	0	N	ID=COSM1295475;OCCURENCE=1(urinary_tract)	.
chr1	173556912	173556912	C	T	exonic	SLC9C2	solute carrier family 9 member C2 (putative)	nonsynonymous SNV	p.V139I	rs147559775	0	0	0	N	ID=COSM2075581;OCCURENCE=1(pancreas)	.
chr1	180044257	180044257	C	T	exonic	CEP350	centrosomal protein 350	nonsynonymous SNV	p.R1890C	rs148196085	0	0	0	D	ID=COSM3479404,COSM3479403;OCCURENCE=2(skin),1(large_intestine)	.
chr1	180905575	180905575	C	T	exonic	KIAA1614	KIAA1614	nonsynonymous SNV	p.R844W	rs375225309	0	0	0	N	ID=COSM2096295;OCCURENCE=2(large_intestine)	.
chr1	181480603	181480603	C	T	exonic	CACNA1E	calcium voltage-gated channel subunit alpha1 E	nonsynonymous SNV	p.R157C	rs758390509	0	0	0	D	ID=COSM4496188,COSM4496190,COSM4496189;OCCURENCE=1(skin)	.	PREGABALIN; SNX482; NI2+; BEPRIDIL HYDROCHLORIDE; IMAGABALIN; PB2+; GABAPENTIN ENACARBIL; ATAGABALIN; GABAPENTIN; CD2+
chr1	181762859	181762859	C	T	exonic	CACNA1E	calcium voltage-gated channel subunit alpha1 E	nonsynonymous SNV	p.P1986L		0	0	0	D	ID=COSM3479809;OCCURENCE=1(skin)	.	PREGABALIN; SNX482; NI2+; BEPRIDIL HYDROCHLORIDE; IMAGABALIN; PB2+; GABAPENTIN ENACARBIL; ATAGABALIN; GABAPENTIN; CD2+
chr1	182442859	182442859	G	A	exonic	RGSL1	regulator of G protein signaling like 1	nonsynonymous SNV	p.E205K		0	0	0		ID=COSM4554175,COSM4554174;OCCURENCE=1(skin)	.
chr1	182555629	182555629	C	T	exonic	RNASEL	ribonuclease L	nonsynonymous SNV	p.V105M	rs757668971	0	0	0	N	ID=COSM212984,COSM6767109;OCCURENCE=1(breast),1(large_intestine)	.
chr1	183111704	183111704	G	A	exonic	LAMC1	laminin subunit gamma 1	nonsynonymous SNV	p.E1537K	rs79826197	0	0	0	N	ID=COSM1337000;OCCURENCE=1(thyroid),1(large_intestine)	.
chr1	185109211	185109211	C	A	exonic	TRMT1L	tRNA methyltransferase 1 like	stopgain	p.E335X		0	0	0		ID=COSM6123458,COSM6123457;OCCURENCE=1(lung)	.
chr1	185144058	185144058	C	T	exonic	SWT1	SWT1, RNA endoribonuclease homolog	nonsynonymous SNV	p.S260L	rs186283787	0	0	0	N	ID=COSM208897;OCCURENCE=1(breast),1(skin),1(endometrium)	.
chr1	185958651	185958651	A	C	exonic	HMCN1	hemicentin 1	nonsynonymous SNV	p.K1027T		0	0	0	N	ID=COSM1254275;OCCURENCE=1(pleura),1(haematopoietic_and_lymphoid_tissue),3(stomach),2(oesophagus),2(large_intestine)	.
chr1	186276284	186276286	CTC	-	exonic	PRG4	proteoglycan 4	nonframeshift deletion	p.P479del	rs200031345	0	0	0		ID=COSM287740;OCCURENCE=2(NS),1(kidney),9(upper_aerodigestive_tract),1(large_intestine),1(central_nervous_system)	.
chr1	186276592	186276592	C	A	exonic	PRG4	proteoglycan 4	nonsynonymous SNV	p.P581T		0	0	0	N	ID=COSM3677497;OCCURENCE=1(haematopoietic_and_lymphoid_tissue)	.
chr1	186313129	186313129	C	T	exonic	TPR	translocated promoter region, nuclear basket protein	nonsynonymous SNV	p.V1171I	rs200062723	0	0	0	N	ID=COSM5978179;OCCURENCE=1(upper_aerodigestive_tract)	.
chr1	190424010	190424010	C	T	exonic	BRINP3	BMP/retinoic acid inducible neural specific 3	nonsynonymous SNV	p.R4Q	rs367647063	0	0	0	N	ID=COSM3480489;OCCURENCE=1(haematopoietic_and_lymphoid_tissue),3(skin)	.
chr1	196748950	196748950	G	A	exonic	CFHR3	complement factor H related 3	nonsynonymous SNV	p.E93K		0	0	0	N	ID=COSM3480831;OCCURENCE=1(NS),3(skin)	.
chr1	197070598	197070599	TC	-	exonic	ASPM	abnormal spindle microtubule assembly	frameshift deletion	p.K2595fs	rs199422173	0	0	0		ID=COSM3666534;OCCURENCE=1(liver)	.
chr1	200378558	200378558	-	G	exonic	ZNF281	zinc finger protein 281	frameshift insertion	p.P92fs	rs751889036	0	0	0		ID=COSM296650;OCCURENCE=3(large_intestine)	.
chr1	200956008	200956008	G	A	exonic	KIF21B	kinesin family member 21B	nonsynonymous SNV	p.T1218M	rs777063474	0	0	0	D	ID=COSM6695192,COSM6695191;OCCURENCE=1(large_intestine)	.
chr1	201044703	201044703	C	T	exonic	CACNA1S	calcium voltage-gated channel subunit alpha1 S	nonsynonymous SNV	p.G623E		0	0	0	D	ID=COSM4532242;OCCURENCE=1(skin)	.	NIMODIPINE; AMLODIPINE; NIFEDIPINE; AMLODIPINE MALEATE; ARVERAPAMIL; CLEVIDIPINE; ATAGABALIN; AZD1305; ISRADIPINE; MEM 1003; VERAPAMIL; GABAPENTIN ENACARBIL; NICARDIPINE HYDROCHLORIDE; ELPETRIGINE; AMLODIPINE BESYLATE; VERAPAMIL; FELODIPINE; IMAGABALIN; DRONEDARONE HYDROCHLORIDE; FELODIPINE; DILTIAZEM HYDROCHLORIDE; PREGABALIN; GABAPENTIN; BEPRIDIL HYDROCHLORIDE; CLEVIDIPINE; NISOLDIPINE; DILTIAZ…
chr1	201178768	201178768	A	G	exonic	IGFN1	immunoglobulin-like and fibronectin type III domain containing 1	nonsynonymous SNV	p.S1583G	rs199574248	0	0	0	N	ID=COSM4143165;OCCURENCE=1(haematopoietic_and_lymphoid_tissue),1(thyroid),9(upper_aerodigestive_tract)	.
chr1	201777084	201777084	C	T	exonic	NAV1	neuron navigator 1	stopgain	p.R1218X		0	0	0		ID=COSM902222;OCCURENCE=1(large_intestine),1(endometrium)	.
chr1	202092464	202092464	G	A	exonic	GPR37L1	G protein-coupled receptor 37 like 1	nonsynonymous SNV	p.E125K	rs748522786	0	0	0	N	ID=COSM299676;OCCURENCE=1(large_intestine),1(endometrium)	.	PROSAPTIDE
chr1	202701054	202701054	G	A	exonic	KDM5B	lysine demethylase 5B	nonsynonymous SNV	p.P1344L		0	0	0	D	ID=COSM222625;OCCURENCE=1(skin)	.	GSK-J4; GSK-J1; PBIT
chr1	202736067	202736067	C	T	exonic	KDM5B	lysine demethylase 5B	nonsynonymous SNV	p.R233H		0	0	0	D	ID=COSM2213173;OCCURENCE=1(upper_aerodigestive_tract),1(large_intestine)	.	GSK-J4; GSK-J1; PBIT
chr1	205210709	205210709	G	A	exonic	TMCC2	transmembrane and coiled-coil domain family 2	nonsynonymous SNV	p.R95Q	rs138497244	0	0	0	N	ID=COSM4027408;OCCURENCE=1(stomach)	.
chr1	205628648	205628648	G	A	exonic	SLC45A3	solute carrier family 45 member 3	nonsynonymous SNV	p.A459V	rs140263007	0	0	0	N	ID=COSM3966206;OCCURENCE=1(central_nervous_system)	.
chr1	206821546	206821546	G	A	exonic	DYRK3	dual specificity tyrosine phosphorylation regulated kinase 3	nonsynonymous SNV	p.D335N		0	0	0	D	ID=COSM902988,COSM902987,COSM1583994;OCCURENCE=1(large_intestine),1(endometrium)	.	COMPOUND 3B [PMID: 23454515]; COMPOUND 1A [PMID: 24900749]
chr1	206821585	206821585	C	T	exonic	DYRK3	dual specificity tyrosine phosphorylation regulated kinase 3	nonsynonymous SNV	p.R348C	rs567048952	0	0	0	N	ID=COSM902992,COSM1927656,COSM902991;OCCURENCE=1(large_intestine),1(endometrium)	.	COMPOUND 3B [PMID: 23454515]; COMPOUND 1A [PMID: 24900749]
chr1	207039325	207039325	G	A	exonic	IL20	interleukin 20	nonsynonymous SNV	p.R43Q	rs750758066	0	0	0	D	ID=COSM903010;OCCURENCE=2(skin),1(large_intestine),1(endometrium)	.
chr1	207787796	207787796	T	C	exonic	CR1	complement C3b/C4b receptor 1 (Knops blood group)	nonsynonymous SNV	p.M2208T	rs61822976	0	0	0	N	ID=COSM397628,COSM397629;OCCURENCE=3(prostate),1(lung)	.	TETANUS TOXOID
chr1	209778918	209778918	C	T	exonic	CAMK1G	calcium/calmodulin dependent protein kinase IG	nonsynonymous SNV	p.R112W		0	0	0	D	ID=COSM1199463;OCCURENCE=1(stomach),3(large_intestine)	.
chr1	212799556	212799556	G	A	exonic	FAM71A	family with sequence similarity 71 member A	nonsynonymous SNV	p.R446H	rs542774295	0	0	0	N	ID=COSM4683166;OCCURENCE=2(large_intestine)	.
chr1	213009267	213009267	C	T	exonic	SPATA45	spermatogenesis associated 45	stopgain	p.W75X		0	0	0		ID=COSM3483179;OCCURENCE=1(skin)	.
chr1	213146268	213146268	G	A	exonic	VASH2	vasohibin 2	nonsynonymous SNV	p.E282K		0	0	0	D	ID=COSM1720958,COSM1720957;OCCURENCE=3(skin)	.
chr1	215848678	215848678	C	T	exonic	USH2A	usherin	nonsynonymous SNV	p.R4192H	rs199605265	0	0	0	D	ID=COSM5461141,COSM5461140;OCCURENCE=1(large_intestine)	.
chr1	215933077	215933077	C	T	exonic	USH2A	usherin	nonsynonymous SNV	p.R3719H	rs527236139	0	0	0	D	ID=COSM3400301,COSM1338822;OCCURENCE=1(breast),2(large_intestine),4(central_nervous_system)	.
chr1	215956214	215956214	C	T	exonic	USH2A	usherin	nonsynonymous SNV	p.R3484Q	rs771999994	0	0	0	N	ID=COSM5845448,COSM5845449;OCCURENCE=1(NS)	.
chr1	216251674	216251674	G	A	exonic	USH2A	usherin	nonsynonymous SNV	p.R1777W	rs770329105	0	0	0	D	ID=COSM5705200,COSM5705201;OCCURENCE=1(haematopoietic_and_lymphoid_tissue),2(large_intestine)	.
chr1	220193517	220193517	C	T	exonic	EPRS	glutamyl-prolyl-tRNA synthetase	nonsynonymous SNV	p.E388K		0	0	0	D	ID=COSM6655499;OCCURENCE=1(large_intestine)	.	HALOFUGINONE
chr1	220197641	220197641	C	T	exonic	EPRS	glutamyl-prolyl-tRNA synthetase	nonsynonymous SNV	p.R303H		0	0	0	D	ID=COSM6453178;OCCURENCE=1(upper_aerodigestive_tract)	.	HALOFUGINONE
chr1	220310239	220310239	G	A	exonic	IARS2	isoleucyl-tRNA synthetase 2, mitochondrial	nonsynonymous SNV	p.V679I		0	0	0	N	ID=COSM1338975;OCCURENCE=2(large_intestine)	.
chr1	220344458	220344458	G	A	exonic	RAB3GAP2	RAB3 GTPase activating non-catalytic protein subunit 2	nonsynonymous SNV	p.S861F		0	0	0	N	ID=COSM3483849;OCCURENCE=2(skin)	.
chr1	220826469	220826469	C	T	exonic	MARK1	microtubule affinity regulating kinase 1	nonsynonymous SNV	p.S588F		0	0	0	D	ID=COSM4851468;OCCURENCE=1(cervix)	.	7-HYDROXYSTAUROSPORINE
chr1	223177899	223177899	G	A	exonic	DISP1	dispatched RND transporter family member 1	nonsynonymous SNV	p.V1054I	rs766641928	0	0	0	N	ID=COSM1960161;OCCURENCE=1(large_intestine)	.
chr1	225267039	225267039	C	T	exonic	DNAH14	dynein axonemal heavy chain 14	nonsynonymous SNV	p.S852F		0	0	0	N	ID=COSM904565,COSM904564;OCCURENCE=1(endometrium)	.
chr1	228033692	228033692	G	A	exonic	PRSS38	protease, serine 38	nonsynonymous SNV	p.R255H	rs147849633	0	0	0	N	ID=COSM210218;OCCURENCE=1(breast)	.
chr1	228456410	228456410	C	T	exonic	OBSCN	obscurin, cytoskeletal calmodulin and titin-interacting RhoGEF	nonsynonymous SNV	p.R1865W	rs759251796	0	0	0	D	ID=COSM6732250,COSM6732249,COSM6732252,COSM6732251;OCCURENCE=1(large_intestine)	.
chr1	228468482	228468482	C	T	exonic	OBSCN	obscurin, cytoskeletal calmodulin and titin-interacting RhoGEF	nonsynonymous SNV	p.R3157W	rs780813015	0	0	0	N	ID=COSM4513656,COSM4513653,COSM4513654,COSM4513655;OCCURENCE=1(skin)	.
chr1	228520936	228520936	G	C	exonic	OBSCN	obscurin, cytoskeletal calmodulin and titin-interacting RhoGEF	nonsynonymous SNV	p.E6213D		0	0	0	N	ID=COSM3984804,COSM3984805,COSM3984806;OCCURENCE=1(kidney)	.
chr1	233363000	233363000	G	A	exonic	PCNX2	pecanex homolog 2	stopgain	p.R826X	rs762677952	0	0	0		ID=COSM4029628,COSM4029629;OCCURENCE=1(stomach),1(large_intestine)	.
chr1	235969140	235969140	G	T	exonic	LYST	lysosomal trafficking regulator	stopgain	p.S1099X		0	0	0		ID=COSM678968;OCCURENCE=1(lung)	.
chr1	237619941	237619941	C	G	exonic	RYR2	ryanodine receptor 2	nonsynonymous SNV	p.H504Q		0	0	0	N	ID=COSM679955;OCCURENCE=1(lung)	.	RYANODINE; SURAMIN; MG2+; ATP; CAFFEINE; CA2+; DANTROLENE; PROCAINE; RUTHENIUM RED
chr1	237656291	237656291	G	A	exonic	RYR2	ryanodine receptor 2	nonsynonymous SNV	p.G620E		0	0	0	D	ID=COSM5902503,COSM5902502;OCCURENCE=1(skin)	.	RYANODINE; SURAMIN; MG2+; ATP; CAFFEINE; CA2+; DANTROLENE; PROCAINE; RUTHENIUM RED
chr1	238053226	238053226	G	A	exonic	ZP4	zona pellucida glycoprotein 4	nonsynonymous SNV	p.A114V	rs34370253	0	0	0	N	ID=COSM1340520;OCCURENCE=1(upper_aerodigestive_tract)	.
chr1	240071533	240071533	G	A	exonic	CHRM3	cholinergic receptor muscarinic 3	nonsynonymous SNV	p.R261H	rs753237593	0	0	0	N	ID=COSM5565255;OCCURENCE=1(prostate)	.	GLYCOPYRROLATE BROMIDE; ACETYLCHOLINE CHLORIDE; METHSCOPOLAMINE BROMIDE; NNC 11-1607; SOLIFENACIN; ANISOTROPINE METHYLBROMIDE; NNC 11-1314; BIPERIDEN; Tarafenacin; ARECAIDINE PROPARGYL ESTER; OXYBUTYNIN; AFDX384; SCOPOLAMINE; BENZQUINAMIDE; REVATROPATE; OXYBUTYNIN; AQ-RA 741; TIOTROPIUM; HEXOCYCLIUM METHYLSULFATE; METHACHOLINE CHLORIDE; DAROTROPIUM BROMIDE; NNC 11-1585; PROPIOMAZINE; FESOTERODINE…
chr1	240072235	240072235	C	T	exonic	CHRM3	cholinergic receptor muscarinic 3	nonsynonymous SNV	p.A495V	rs903730617	0	0	0	N	ID=COSM2149955;OCCURENCE=2(large_intestine),2(central_nervous_system)	.	GLYCOPYRROLATE BROMIDE; ACETYLCHOLINE CHLORIDE; METHSCOPOLAMINE BROMIDE; NNC 11-1607; SOLIFENACIN; ANISOTROPINE METHYLBROMIDE; NNC 11-1314; BIPERIDEN; Tarafenacin; ARECAIDINE PROPARGYL ESTER; OXYBUTYNIN; AFDX384; SCOPOLAMINE; BENZQUINAMIDE; REVATROPATE; OXYBUTYNIN; AQ-RA 741; TIOTROPIUM; HEXOCYCLIUM METHYLSULFATE; METHACHOLINE CHLORIDE; DAROTROPIUM BROMIDE; NNC 11-1585; PROPIOMAZINE; FESOTERODINE…
chr1	240370099	240370099	G	A	exonic	FMN2	formin 2	nonsynonymous SNV	p.E663K		0	0	0	D	ID=COSM679791;OCCURENCE=1(NS),1(stomach),2(skin),1(lung)	.
chr1	247492573	247492573	C	T	exonic	ZNF496	zinc finger protein 496	nonsynonymous SNV	p.R103Q		0	0	0	N	ID=COSM5938807,COSM5938806;OCCURENCE=1(skin)	.
chr1	248366863	248366863	C	T	exonic	OR2M3	olfactory receptor family 2 subfamily M member 3	nonsynonymous SNV	p.S165F	rs267598500	0	0	0	N	ID=COSM3487036;OCCURENCE=4(skin)	.
chr10	6557051	6557051	G	A	exonic	PRKCQ	protein kinase C theta	nonsynonymous SNV	p.S16F	rs759332107	0	0	0	N	ID=COSM6893134;OCCURENCE=1(skin)	.	CEP-2563; INGENOL MEBUTATE; GSK690693; SOPHORETIN; SOTRASTAURIN ACETATE; (7S)-HYDROXYL-STAUROSPORINE; SOTRASTAURIN; SOTRASTAURIN; PKCθ INHIBITOR 14; MIDOSTAURIN; GSK-690693; BRYOSTATIN-1; BRYOSTATIN; COMPOUND 41 [PMID: 25000588]
chr10	7839091	7839091	G	A	exonic	ATP5C1	ATP synthase, H+ transporting, mitochondrial F1 complex, gamma polypeptide 1	nonsynonymous SNV	p.R58Q		0	0	0	D	ID=COSM6227177;OCCURENCE=1(large_intestine)	.
chr10	13178775	13178775	G	A	exonic	OPTN	optineurin	nonsynonymous SNV	p.R548Q	rs550042475	0	0	0	N	ID=COSM136765;OCCURENCE=1(skin)	.
chr10	14950432	14950432	-	T	exonic	DCLRE1C	DNA cross-link repair 1C	frameshift insertion	p.R570fs		0	0	0		ID=COSM5979850,COSM5979851;OCCURENCE=1(upper_aerodigestive_tract)	.
chr10	14987108	14987108	C	T	exonic	DCLRE1C	DNA cross-link repair 1C	nonsynonymous SNV	p.R81Q	rs772627259	0	0	0	D	ID=COSM3665623,COSM1603252;OCCURENCE=2(liver)	.
chr10	17363212	17363212	C	T	exonic	ST8SIA6	ST8 alpha-N-acetyl-neuraminide alpha-2,8-sialyltransferase 6	nonsynonymous SNV	p.E288K	rs763482990	0	0	0	N	ID=COSM5477181;OCCURENCE=2(large_intestine)	.
chr10	18289736	18289736	G	A	exonic	SLC39A12	solute carrier family 39 member 12	nonsynonymous SNV	p.E581K		0	0	0	D	ID=COSM4530929,COSM4530930;OCCURENCE=1(skin)	.
chr10	22616709	22616709	C	T	exonic	BMI1;COMMD3-BMI1	BMI1 proto-oncogene, polycomb ring finger,COMMD3-BMI1 readthrough	nonsynonymous SNV	p.P245S		0	0	0	N	ID=COSM5910677;OCCURENCE=2(skin)	.
chr10	23481743	23481743	G	A	exonic	PTF1A	pancreas specific transcription factor, 1a	nonsynonymous SNV	p.G95D		0	0	0	N	ID=COSM5472998;OCCURENCE=2(large_intestine)	.
chr10	25887664	25887664	G	A	exonic	GPR158	G protein-coupled receptor 158	nonsynonymous SNV	p.E1037K	rs12412738	0	0	0	N	ID=COSM683589;OCCURENCE=1(lung)	.
chr10	30315230	30315230	C	T	exonic	JCAD	junctional cadherin 5 associated	nonsynonymous SNV	p.E1283K		0	0	0	N	ID=COSM5601688;OCCURENCE=1(skin)	.
chr10	43315804	43315804	T	A	exonic	BMS1	BMS1, ribosome biogenesis factor	nonsynonymous SNV	p.F901I	rs200151761	0	0	0	N	ID=COSM4177960;OCCURENCE=1(skin)	.
chr10	43598018	43598018	G	A	exonic	RET	ret proto-oncogene	nonsynonymous SNV	p.R189H	rs753707182	0	1	0	N	ID=COSM1957157,COSM1957158;OCCURENCE=1(breast),1(large_intestine)	Sorafenib, vandetinib, RET Inhibitors	IMATINIB; INK128; Y078-DM1; Vandetanib; Everolimus; SORAFENIB; AT9283; AMUVATINIB; LINIFANIB; Lenvatinib; Motesanib; LENVATINIB; TAMATINIB; VANDETANIB; VANDETANIB; SUNITINIB; DOVITINIB; SU11248; COMPOUND 8H [PMID: 21561767]; BAY 43-9006; Sunitinib; VANDETANIB; IMATINIB; SUNITINIB; Vandetanib; VANDETANIB; QUIZARTINIB; HG-6-63-01; Pz-1; VANDETANIB; MOTESANIB; AST-487; MOTESANIB; REGORAFENIB; SORAFE…
chr10	43606829	43606829	G	A	exonic	RET	ret proto-oncogene	nonsynonymous SNV	p.E480K	rs537874538	0	1	0	D	ID=COSM3437773,COSM3437772;OCCURENCE=1(skin)	Sorafenib, vandetinib, RET Inhibitors	IMATINIB; INK128; Y078-DM1; Vandetanib; Everolimus; SORAFENIB; AT9283; AMUVATINIB; LINIFANIB; Lenvatinib; Motesanib; LENVATINIB; TAMATINIB; VANDETANIB; VANDETANIB; SUNITINIB; DOVITINIB; SU11248; COMPOUND 8H [PMID: 21561767]; BAY 43-9006; Sunitinib; VANDETANIB; IMATINIB; SUNITINIB; Vandetanib; VANDETANIB; QUIZARTINIB; HG-6-63-01; Pz-1; VANDETANIB; MOTESANIB; AST-487; MOTESANIB; REGORAFENIB; SORAFE…
chr10	43617416	43617416	T	C	exonic	RET	ret proto-oncogene	nonsynonymous SNV	p.M918T	rs74799832	0	1	M918T	D	ID=COSM4770356,COSM965;OCCURENCE=1(breast),30(adrenal_gland),325(thyroid)	Sorafenib, vandetinib, RET Inhibitors	IMATINIB; INK128; Y078-DM1; Vandetanib; Everolimus; SORAFENIB; AT9283; AMUVATINIB; LINIFANIB; Lenvatinib; Motesanib; LENVATINIB; TAMATINIB; VANDETANIB; VANDETANIB; SUNITINIB; DOVITINIB; SU11248; COMPOUND 8H [PMID: 21561767]; BAY 43-9006; Sunitinib; VANDETANIB; IMATINIB; SUNITINIB; Vandetanib; VANDETANIB; QUIZARTINIB; HG-6-63-01; Pz-1; VANDETANIB; MOTESANIB; AST-487; MOTESANIB; REGORAFENIB; SORAFE…
chr10	48388759	48388759	C	T	exonic	RBP3	retinol binding protein 3	nonsynonymous SNV	p.E707K	rs782314171	0	0	0	D	ID=COSM3438088;OCCURENCE=1(skin)	.	RETINOL; RETINOIDS; BUTYRATE; RETINOID; RETINYL PALMITATE
chr10	48390160	48390160	C	T	exonic	RBP3	retinol binding protein 3	nonsynonymous SNV	p.E240K	rs368502569	0	0	0	D	ID=COSM6457012;OCCURENCE=1(upper_aerodigestive_tract)	.	RETINOL; RETINOIDS; BUTYRATE; RETINOID; RETINYL PALMITATE
chr10	49431253	49431253	C	T	exonic	FRMPD2	FERM and PDZ domain containing 2	stopgain	p.W410X		0	0	0		ID=COSM3438195;OCCURENCE=1(skin)	.
chr10	50872913	50872913	C	T	exonic	CHAT	choline O-acetyltransferase	nonsynonymous SNV	p.L690F		0	0	0	D	ID=COSM5012152,COSM5012151;OCCURENCE=1(NS),1(kidney)	.	PILOCARPINE; TRIIODOTHYRONINE; SODIUM CHLORIDE; ETHANOL; TESTOSTERONE; DIHYDROTESTOSTERONE; DEXAMETHASONE
chr10	50953530	50953530	G	A	exonic	OGDHL	oxoglutarate dehydrogenase like	nonsynonymous SNV	p.R497W	rs765354186	0	0	0	D	ID=COSM4014506;OCCURENCE=1(stomach),1(large_intestine)	.
chr10	55582088	55582088	C	T	exonic	PCDH15	protocadherin related 15	nonsynonymous SNV	p.V1802I	rs111033463	0	0	0	N	ID=COSM918920,COSM918921;OCCURENCE=1(endometrium)	.
chr10	60549640	60549640	G	A	exonic	BICC1	BicC family RNA binding protein 1	nonsynonymous SNV	p.V332I	rs200593598	0	0	0	N	ID=COSM2148200;OCCURENCE=1(NS)	.
chr10	61828580	61828580	T	-	exonic	ANK3	ankyrin 3	frameshift deletion	p.K4020fs		0	0	0		ID=COSM1348418;OCCURENCE=5(large_intestine)	.
chr10	61868760	61868760	G	A	exonic	ANK3	ankyrin 3	nonsynonymous SNV	p.R1001C	rs372646492	0	0	0	D	ID=COSM4014975,COSM4014973,COSM4014974;OCCURENCE=1(stomach)	.
chr10	63170124	63170124	G	A	exonic	TMEM26	transmembrane protein 26	nonsynonymous SNV	p.R355W		0	0	0	N	ID=COSM338127;OCCURENCE=1(lung),1(large_intestine)	.
chr10	63170274	63170274	C	T	exonic	TMEM26	transmembrane protein 26	nonsynonymous SNV	p.V305M		0	0	0	N	ID=COSM3368081;OCCURENCE=1(thyroid)	.
chr10	64573112	64573112	C	A	exonic	EGR2	early growth response 2	nonsynonymous SNV	p.S429I		0	0	0	N	ID=COSM1205060;OCCURENCE=1(large_intestine)	.	RETINOIC ACID
chr10	71332331	71332331	C	T	exonic	NEUROG3	neurogenin 3	nonsynonymous SNV	p.G157R		0	0	0	D	ID=COSM1241478;OCCURENCE=1(oesophagus)	.
chr10	72462179	72462179	G	A	exonic	ADAMTS14	ADAM metallopeptidase with thrombospondin type 1 motif 14	nonsynonymous SNV	p.V212I	rs141188417	0	0	0	N	ID=COSM6593892,COSM685460;OCCURENCE=1(lung),1(large_intestine)	.
chr10	73057757	73057757	C	T	exonic	UNC5B	unc-5 netrin receptor B	nonsynonymous SNV	p.S861F		0	0	0	N	ID=COSM1702606;OCCURENCE=1(skin)	.
chr10	73562781	73562781	G	A	exonic	CDH23	cadherin related 23	nonsynonymous SNV	p.D2542N		0	0	0	D	ID=COSM2161230;OCCURENCE=1(skin)	.
chr10	75566216	75566216	G	A	exonic	NDST2	N-deacetylase and N-sulfotransferase 2	nonsynonymous SNV	p.T422M	rs751982453	0	0	0	N	ID=COSM117027;OCCURENCE=1(ovary)	.
chr10	79565518	79565518	C	T	exonic	DLG5	discs large MAGUK scaffold protein 5	nonsynonymous SNV	p.R1690Q	rs146019787	0	0	0	N	ID=COSM5896054;OCCURENCE=1(skin),1(large_intestine)	.
chr10	81319184	81319184	G	A	exonic	SFTPA2	surfactant protein A2	nonsynonymous SNV	p.A19V	rs201847938	0	0	0	N	ID=COSM3931135;OCCURENCE=1(urinary_tract)	.
chr10	86008778	86008778	C	T	exonic	RGR	retinal G protein coupled receptor	nonsynonymous SNV	p.R117C	rs142050467	0	0	0	D	ID=COSM6230344,COSM6230343;OCCURENCE=1(large_intestine)	.
chr10	87362424	87362424	C	T	exonic	GRID1	glutamate ionotropic receptor delta type subunit 1	nonsynonymous SNV	p.R879H	rs536785868	0	0	0	N	ID=COSM4975739;OCCURENCE=1(breast),2(oesophagus)	.
chr10	89312009	89312009	C	T	exonic	MINPP1	multiple inositol-polyphosphate phosphatase 1	nonsynonymous SNV	p.S413L		0	0	0	D	ID=COSM4974884,COSM4974885;OCCURENCE=2(oesophagus),1(large_intestine)	.
chr10	89692892	89692892	G	A	exonic	PTEN	phosphatase and tensin homolog	nonsynonymous SNV	p.A126T		1	0	0	D	ID=COSM5051;OCCURENCE=1(large_intestine),3(central_nervous_system),5(endometrium)	PI3K/AKT/MTOR inhibitors, PARP inhinitors	Temsirolimus; PF-04691502; Oxaliplatin; DETD-35; Copanlisib; Fulvestrant; CX-6258; 2-Methoxyestradiol; rigosertib; PKI-402; Cetuximab; BAY1125976; EVEROLIMUS; Metformin; GDC-0032; Vandetanib; DS-7423; AZD5363; AZD8186; PD-0325901; LGX818; BLZ945; ARQ092; MTOR INHIBITORS; BI-69A11; CARBOPLATIN; unspecified PD-1 antibody; GSK2334470; U0126; MEK162; Gemcitabine; BGJ398; PLX4720; ZSTK474; BGT226; VAN…	Breast Cancer,EL:4:AZD6482 + Alpelisib(25409150) ; All Tumors,EL:4:GSK2636771, AZD8186(18594509, 22588880, 25398829, 16647110, 25544636)
chr10	89712013	89712013	-	G	exonic	PTEN	phosphatase and tensin homolog	frameshift insertion	p.C211fs		1	0	0		ID=COSM921119;OCCURENCE=1(endometrium)	PI3K/AKT/MTOR inhibitors, PARP inhinitors	Temsirolimus; PF-04691502; Oxaliplatin; DETD-35; Copanlisib; Fulvestrant; CX-6258; 2-Methoxyestradiol; rigosertib; PKI-402; Cetuximab; BAY1125976; EVEROLIMUS; Metformin; GDC-0032; Vandetanib; DS-7423; AZD5363; AZD8186; PD-0325901; LGX818; BLZ945; ARQ092; MTOR INHIBITORS; BI-69A11; CARBOPLATIN; unspecified PD-1 antibody; GSK2334470; U0126; MEK162; Gemcitabine; BGJ398; PLX4720; ZSTK474; BGT226; VAN…	Breast Cancer,EL:4:AZD6482 + Alpelisib(25409150) ; All Tumors,EL:4:GSK2636771, AZD8186(18594509, 22588880, 25398829, 16647110, 25544636)
chr10	90966490	90966490	A	G	exonic	CH25H	cholesterol 25-hydroxylase	nonsynonymous SNV	p.M187T		0	0	0	N	ID=COSM6627663;OCCURENCE=1(large_intestine)	.	TABIMORELIN; COBICISTAT
chr10	93601946	93601946	A	-	exonic	TNKS2	tankyrase 2	frameshift deletion	p.N622fs	rs749004712	0	0	0		ID=COSM294902;OCCURENCE=2(breast),6(stomach),2(skin),6(large_intestine)	.
chr10	94109496	94109496	C	T	exonic	MARCH5	membrane associated ring-CH-type finger 5	stopgain	p.R208X	rs911621736	0	0	0		ID=COSM921458;OCCURENCE=1(endometrium)	.
chr10	94246978	94246978	G	A	exonic	IDE	insulin degrading enzyme	nonsynonymous SNV	p.A544V	rs375936259	0	0	0	N	ID=COSM311914;OCCURENCE=1(lung),1(large_intestine)	.	NTE-1; NTE-2; QUINOLINE 2; BACITRACIN
chr10	95335855	95335855	C	T	exonic	FFAR4	free fatty acid receptor 4	nonsynonymous SNV	p.S192L	rs370316092	0	0	0	N	ID=COSM1702771;OCCURENCE=1(NS),1(stomach),6(skin)	.	MYRISTIC ACID; GW9508; COMPOUND A [PMID 24997608]; GRIFOLIC ACID; NCG21; LINOLEIC ACID; OLEIC ACID; α-LINOLENIC ACID; GRIFOLIC ACID METHYL ETHER
chr10	96109908	96109908	C	T	exonic	NOC3L	NOC3 like DNA replication regulator	nonsynonymous SNV	p.V364I	rs368849782	0	0	0	N	ID=COSM1970662;OCCURENCE=1(soft_tissue)	.
chr10	96709029	96709029	G	A	exonic	CYP2C9	cytochrome P450 family 2 subfamily C member 9	nonsynonymous SNV	p.M269I		0	0	0	N	ID=COSM3442005;OCCURENCE=2(skin)	.	Warfarin; Lesinurad; Flurbiprofen; Phenytoin; COMPOUND 51 [CROSIGNANI ET AL., 2011]; Flibanserin; Prasugrel; ANTIPSYCHOTIC AGENT; Celecoxib; WARFARIN; Piroxicam; NAPROXEN; COMPOUND 3 [PMID: 18255300]; Dronabinol
chr10	97369966	97369966	G	A	exonic	ALDH18A1	aldehyde dehydrogenase 18 family member A1	nonsynonymous SNV	p.R732C	rs760203992	0	0	0	D	ID=COSM921811;OCCURENCE=1(endometrium)	.
chr10	97779519	97779519	G	A	exonic	CC2D2B	coiled-coil and C2 domain containing 2B	nonsynonymous SNV	p.E240K		0	0	0	N	ID=COSM3868173,COSM3868172;OCCURENCE=1(skin)	.
chr10	101572884	101572884	G	A	exonic	ABCC2	ATP binding cassette subfamily C member 2	nonsynonymous SNV	p.G693R	rs765570396	0	0	0	D	ID=COSM4658300;OCCURENCE=2(large_intestine)	.	PAK-104P; SULFINPYRAZONE; SULFONATES; SULFINPYRAZONE
chr10	103542299	103542299	C	T	exonic	NPM3	nucleophosmin/nucleoplasmin 3	nonsynonymous SNV	p.R87Q		0	0	0	N	ID=COSM2058617;OCCURENCE=1(NS)	.
chr10	103868035	103868035	C	T	exonic	LDB1	LIM domain binding 1	nonsynonymous SNV	p.G351R		0	0	0	N	ID=COSM4852816,COSM4852815;OCCURENCE=1(cervix)	.
chr10	103921611	103921611	C	T	exonic	NOLC1	nucleolar and coiled-body phosphoprotein 1	nonsynonymous SNV	p.P634S	rs770815901	0	0	0	D	ID=COSM1702948;OCCURENCE=1(pancreas),1(skin)	.
chr10	104176551	104176551	G	A	exonic	PSD	pleckstrin and Sec7 domain containing	nonsynonymous SNV	p.P82L		0	0	0	N	ID=COSM5369972;OCCURENCE=1(skin)	.
chr10	104679513	104679513	G	A	exonic	CNNM2	cyclin and CBS domain divalent metal cation transport mediator 2	nonsynonymous SNV	p.D426N		0	0	0	D	ID=COSM2059617,COSM2059616;OCCURENCE=2(large_intestine)	.
chr10	106074330	106074330	C	T	exonic	ITPRIP	inositol 1,4,5-trisphosphate receptor interacting protein	nonsynonymous SNV	p.V494M	rs374132492	0	0	0	N	ID=COSM6688918;OCCURENCE=1(large_intestine)	.
chr10	108412274	108412274	C	T	exonic	SORCS1	sortilin related VPS10 domain containing receptor 1	nonsynonymous SNV	p.V781I	rs370679881	0	0	0	N	ID=COSM1296923,COSM1296924;OCCURENCE=1(urinary_tract)	.
chr10	113937790	113937790	G	A	exonic	GPAM	glycerol-3-phosphate acyltransferase, mitochondrial	nonsynonymous SNV	p.P84L		0	0	0	N	ID=COSM5027299;OCCURENCE=1(breast)	.
chr10	116605188	116605188	C	T	exonic	FAM160B1	family with sequence similarity 160 member B1	nonsynonymous SNV	p.S359L		0	0	0	N	ID=COSM5935580,COSM5935581;OCCURENCE=1(skin)	.
chr10	120810102	120810102	G	A	exonic	EIF3A	eukaryotic translation initiation factor 3 subunit A	nonsynonymous SNV	p.R802C		0	0	0	N	ID=COSM5566882;OCCURENCE=1(prostate)	.
chr10	120824976	120824976	G	A	exonic	EIF3A	eukaryotic translation initiation factor 3 subunit A	nonsynonymous SNV	p.R353C		0	0	0	N	ID=COSM6652776;OCCURENCE=1(large_intestine)	.
chr10	121203238	121203238	G	A	exonic	GRK5	G protein-coupled receptor kinase 5	nonsynonymous SNV	p.E414K	rs570225563	0	0	0	N	ID=COSM4626627;OCCURENCE=1(large_intestine)	.	COMPOUND 1O [PMID: 24210504]
chr10	121692598	121692598	G	A	exonic	SEC23IP	SEC23 interacting protein	nonsynonymous SNV	p.R947Q	rs200302175	0	0	0	D	ID=COSM277200;OCCURENCE=2(large_intestine),1(endometrium)	.
chr10	122666319	122666319	G	A	exonic	WDR11	WD repeat domain 11	nonsynonymous SNV	p.V1157M	rs993950003	0	0	0	D	ID=COSM144848;OCCURENCE=1(haematopoietic_and_lymphoid_tissue)	.
chr10	123843789	123843789	G	T	exonic	TACC2	transforming acidic coiled-coil containing protein 2	nonsynonymous SNV	p.G592W		0	0	0	N	ID=COSM6028373,COSM6028372;OCCURENCE=1(large_intestine)	.
chr10	124339330	124339330	C	A	exonic	DMBT1	deleted in malignant brain tumors 1	nonsynonymous SNV	p.H306N	rs568492430	0	0	0	N	ID=COSM4677971,COSM4677970,COSM4677972;OCCURENCE=1(large_intestine)	.
chr10	124339362	124339362	T	A	exonic	DMBT1	deleted in malignant brain tumors 1	nonsynonymous SNV	p.N316K	rs202149132	0	0	0	N	ID=COSM5154273;OCCURENCE=1(large_intestine)	.
chr10	126090306	126090306	C	T	exonic	OAT	ornithine aminotransferase	nonsynonymous SNV	p.A335T	rs751075605	0	0	0	D	ID=COSM915808;OCCURENCE=1(large_intestine),1(endometrium)	.
chr10	126714720	126714720	G	A	exonic	CTBP2	C-terminal binding protein 2	nonsynonymous SNV	p.P537S		0	0	0	N	ID=COSM300276;OCCURENCE=1(large_intestine)	.
chr10	131565221	131565221	C	T	exonic	MGMT	O-6-methylguanine-DNA methyltransferase	nonsynonymous SNV	p.A226V	rs773919809	0	0	0	N	ID=COSM6450273,COSM6450274;OCCURENCE=1(upper_aerodigestive_tract)	.	CHLORAMBUCIL; CARMUSTINE; CPT-11; GENISTEIN; NITROSOUREAS; CDDP; TGFBETA1; DOX; ANTIOXIDANT; ADJUVANT; GLUCOCORTICOID; DX-8951F; TEMOZOLOMIDE; 5-AZACYTIDINE; IFOSFAMIDE; MELPHALAN; IFN; ACNU; CISPLATIN; MNU; DTIC; ENU; TEMOLOZOMIDE; ETHACRYNIC ACID; 6-THIOGUANINE; CYTOKINES; MAFOSFAMIDE; G207; TEMOZOLOMIDE; METHYLNITROSOUREA; TRIAZENE COMPOUNDS; ANTICARCINOGENIC; HYCANTHONE; CAMPTOTHECIN; FOTEMUS…
chr10	133930789	133930789	G	A	exonic	JAKMIP3	Janus kinase and microtubule interacting protein 3	nonsynonymous SNV	p.R115Q	rs373833963	0	0	0	N	ID=COSM4543821;OCCURENCE=1(skin)	.
chr10	134743282	134743282	C	T	exonic	CFAP46	cilia and flagella associated protein 46	nonsynonymous SNV	p.R298H	rs369847869	0	0	0	N	ID=COSM1346887,COSM1346886,COSM1346888;OCCURENCE=1(large_intestine)	.
chr10	134940832	134940832	C	T	exonic	ADGRA1	adhesion G protein-coupled receptor A1	nonsynonymous SNV	p.A886V		0	0	0	N	ID=COSM5790762,COSM5790763;OCCURENCE=1(breast)	.
chr10	135053221	135053221	C	T	exonic	VENTX	VENT homeobox	nonsynonymous SNV	p.R95C	rs776964051	0	0	0	D	ID=COSM1675683;OCCURENCE=1(haematopoietic_and_lymphoid_tissue),1(large_intestine)	.
chr10	135207738	135207738	C	T	exonic	MTG1	mitochondrial ribosome associated GTPase 1	nonsynonymous SNV	p.P5L		0	0	0	N	ID=COSM6304554;OCCURENCE=1(liver)	.
chr11	299396	299396	G	A	exonic	IFITM5	interferon induced transmembrane protein 5	nonsynonymous SNV	p.P32L	rs142041432	0	0	0	N	ID=COSM1561441;OCCURENCE=1(large_intestine)	.
chr11	1093229	1093229	C	T	exonic	MUC2	mucin 2, oligomeric mucus/gel-forming	nonsynonymous SNV	p.T1683M	rs754473431	0	0	0	N	ID=COSM4184059,COSM4184058;OCCURENCE=3(soft_tissue),1(lung),3(large_intestine)	.	5-FU; CHONDROITIN; PD-98059; IFN; 5-AZADEOXYCYTIDINE; DEXTRAN SULFATE SODIUM; CHEMOPREVENTIVE AGENT; 5-AZA-2&APOS;-DEOXYCYTIDINE; GPI-0100
chr11	1093273	1093273	T	A	exonic	MUC2	mucin 2, oligomeric mucus/gel-forming	nonsynonymous SNV	p.S1698T	rs55659850	0	0	0	N	ID=COSM4184070,COSM4184071;OCCURENCE=1(bone),2(liver),1(thyroid),1(large_intestine)	.	5-FU; CHONDROITIN; PD-98059; IFN; 5-AZADEOXYCYTIDINE; DEXTRAN SULFATE SODIUM; CHEMOPREVENTIVE AGENT; 5-AZA-2&APOS;-DEOXYCYTIDINE; GPI-0100
chr11	1096514	1096514	G	A	exonic	MUC2	mucin 2, oligomeric mucus/gel-forming	nonsynonymous SNV	p.R2180H	rs201164577	0	0	0	N	ID=COSM5050503;OCCURENCE=1(stomach)	.	5-FU; CHONDROITIN; PD-98059; IFN; 5-AZADEOXYCYTIDINE; DEXTRAN SULFATE SODIUM; CHEMOPREVENTIVE AGENT; 5-AZA-2&APOS;-DEOXYCYTIDINE; GPI-0100
chr11	1097769	1097769	C	A	exonic	MUC2	mucin 2, oligomeric mucus/gel-forming	nonsynonymous SNV	p.Q2288K		0	0	0	N	ID=COSM5837759;OCCURENCE=1(NS)	.	5-FU; CHONDROITIN; PD-98059; IFN; 5-AZADEOXYCYTIDINE; DEXTRAN SULFATE SODIUM; CHEMOPREVENTIVE AGENT; 5-AZA-2&APOS;-DEOXYCYTIDINE; GPI-0100
chr11	1268063	1268063	C	T	exonic	MUC5B	mucin 5B, oligomeric mucus/gel-forming	nonsynonymous SNV	p.A3321V	rs779290184	0	0	0	N	ID=COSM1976810,COSM1976809;OCCURENCE=1(bone),1(pancreas),3(thyroid),1(large_intestine)	.
chr11	4510537	4510537	C	T	exonic	OR52K1	olfactory receptor family 52 subfamily K member 1	nonsynonymous SNV	p.T136M	rs141250648	0	0	0	N	ID=COSM145728;OCCURENCE=1(bone),2(haematopoietic_and_lymphoid_tissue)	.
chr11	4674295	4674295	C	T	exonic	OR51E1	olfactory receptor family 51 subfamily E member 1	nonsynonymous SNV	p.S180F		0	0	0	N	ID=COSM226248;OCCURENCE=2(skin)	.
chr11	4674564	4674564	C	T	exonic	OR51E1	olfactory receptor family 51 subfamily E member 1	nonsynonymous SNV	p.R270C	rs575981363	0	0	0	N	ID=COSM377828;OCCURENCE=1(lung),1(cervix),2(large_intestine)	.
chr11	4936018	4936018	C	T	exonic	OR51G2	olfactory receptor family 51 subfamily G member 2	nonsynonymous SNV	p.M292I		0	0	0	N	ID=COSM1703401;OCCURENCE=1(skin)	.
chr11	4967600	4967600	G	A	exonic	OR51A4	olfactory receptor family 51 subfamily A member 4	nonsynonymous SNV	p.S244L		0	0	0	D	ID=COSM3448295;OCCURENCE=3(skin)	.
chr11	5537465	5537465	T	G	exonic	UBQLNL	ubiquilin like	nonsynonymous SNV	p.Q69H		0	0	0	D	ID=COSM3415949;OCCURENCE=1(oesophagus),1(large_intestine)	.
chr11	5602294	5602294	G	A	exonic	OR52B6	olfactory receptor family 52 subfamily B member 6	nonsynonymous SNV	p.G63D	rs759816610	0	0	0	N	ID=COSM1354556;OCCURENCE=1(large_intestine)	.
chr11	5809914	5809914	A	C	exonic	OR52N1	olfactory receptor family 52 subfamily N member 1	nonsynonymous SNV	p.F45V		0	0	0	N	ID=COSM1260401;OCCURENCE=3(stomach),1(pancreas),2(oesophagus)	.
chr11	6261667	6261667	C	T	exonic	CNGA4	cyclic nucleotide gated channel alpha 4	nonsynonymous SNV	p.R215W	rs147119016	0	0	0	D	ID=COSM1248543;OCCURENCE=1(oesophagus)	.
chr11	6291516	6291516	G	A	exonic	CCKBR	cholecystokinin B receptor	nonsynonymous SNV	p.R201H	rs140614653	0	0	0	N	ID=COSM4670163,COSM4670164;OCCURENCE=2(large_intestine)	.	CERULETIDE; DESULFATED GASTRIN-14; [3H]GASTRIN; BENZODIAZEPINE; GV150013; DESULFATED GASTRIN-34; TT-223; [125I]DTYR-GLY-[(NLE28,31)CCK-26-33; L-365260; Netazepide; PD-135158; CCK-33; DESULFATED GASTRIN-17; L-740093; PENTAGASTRIN; MORPHINE; JNJ-26070109; CI-988; LY-288513; DIAZEPAM; CI-988; DEVAZEPIDE; DESULFATED CHOLECYSTOKININ-8; GASTRIN-14; [3H]L365260; GW-5823; A-71378; LORGLUMIDE; [125I]-BDZ2…
chr11	6555035	6555035	C	T	exonic	DNHD1	dynein heavy chain domain 1	nonsynonymous SNV	p.S877L	rs780428135	0	0	0	N	ID=COSM1204266;OCCURENCE=1(large_intestine)	.
chr11	8959359	8959359	C	T	exonic	ASCL3	achaete-scute family bHLH transcription factor 3	nonsynonymous SNV	p.R117H	rs748424739	0	0	0	D	ID=COSM1675826;OCCURENCE=1(haematopoietic_and_lymphoid_tissue),2(upper_aerodigestive_tract)	.
chr11	19077250	19077250	G	A	exonic	MRGPRX2	MAS related GPR family member X2	nonsynonymous SNV	p.L234F		0	0	0	N	ID=COSM4430132;OCCURENCE=1(oesophagus)	.
chr11	27679624	27679624	G	A	exonic	BDNF	brain derived neurotrophic factor	nonsynonymous SNV	p.T245M	rs754270781	0	0	0	N	ID=COSM1675914,COSM403634;OCCURENCE=1(ovary),1(lung)	.	CAPSAICIN; ANTIOXIDANT; VINCRISTINE; CHLORPROMAZINE; VERTEPORFIN; IL-12; NICARDIPINE; ANTIBIOTICS; POLYSIALIC ACID; TCDD; DDTC; LIDOCAINE; MEDICATION; BORTEZOMIB; HORMONES; L-DOPA; DOXORUBICIN; VASOPRESSIN; ERYTHROPOIETIN; CURCUMIN; GEMFIBROZIL; 6-HYDROXYDOPAMINE; ACTINOMYCIN D; TRANSFORMING GROWTH FACTOR; ANESTHETICS; INDOMETHACIN; MARIJUANA; GP-120; INTERLEUKIN-1 RECEPTOR ANTAGONIST; DES; TRAMA…
chr11	28045380	28045380	G	A	exonic	KIF18A	kinesin family member 18A	nonsynonymous SNV	p.S841L	rs369809315	0	0	0	N	ID=COSM926155;OCCURENCE=1(stomach),2(large_intestine),1(biliary_tract),1(endometrium)	.
chr11	35229676	35229676	C	T	exonic	CD44	CD44 molecule (Indian blood group)	nonsynonymous SNV	p.T480M	rs367650491	0	0	0	D	ID=COSM6623785;OCCURENCE=1(large_intestine)	.	GENTAMICIN; MPA; TUMOR NECROSIS FACTOR; GP-120; INTERFERON GAMMA; HYALURONAN; RG7356; MOMETASONE FUROATE
chr11	46529825	46529825	C	T	exonic	AMBRA1	autophagy and beclin 1 regulator 1	nonsynonymous SNV	p.R752H		0	0	0	N	ID=COSM216752,COSM216753;OCCURENCE=2(pancreas),1(large_intestine)	.
chr11	48177607	48177607	G	A	exonic	PTPRJ	protein tyrosine phosphatase, receptor type J	nonsynonymous SNV	p.R1125H	rs374260795	0	0	0	D	ID=COSM927550,COSM927551;OCCURENCE=1(stomach),1(endometrium)	.
chr11	48239049	48239049	G	A	exonic	OR4B1	olfactory receptor family 4 subfamily B member 1	nonsynonymous SNV	p.G230R		0	0	0	N	ID=COSM3447977;OCCURENCE=1(skin)	.
chr11	48328202	48328202	C	T	exonic	OR4S1	olfactory receptor family 4 subfamily S member 1	nonsynonymous SNV	p.A143V	rs761256684	0	0	0	N	ID=COSM1638203;OCCURENCE=1(bone)	.
chr11	55587289	55587289	T	G	exonic	OR5D18	olfactory receptor family 5 subfamily D member 18	nonsynonymous SNV	p.F62V		0	0	0	N	ID=COSM1260463;OCCURENCE=2(oesophagus),1(lung)	.
chr11	56058178	56058178	G	A	exonic	OR8H1	olfactory receptor family 8 subfamily H member 1	nonsynonymous SNV	p.R121C	rs199982658	0	0	0	D	ID=COSM3449339;OCCURENCE=3(skin)	.
chr11	56230204	56230204	C	T	exonic	OR5M9	olfactory receptor family 5 subfamily M member 9	nonsynonymous SNV	p.R225H	rs769272386	0	0	0	N	ID=COSM928372;OCCURENCE=3(pancreas),1(endometrium)	.
chr11	56230667	56230667	A	C	exonic	OR5M9	olfactory receptor family 5 subfamily M member 9	nonsynonymous SNV	p.F71V		0	0	0	N	ID=COSM4755786;OCCURENCE=1(stomach)	.
chr11	56310243	56310243	C	T	exonic	OR5M11	olfactory receptor family 5 subfamily M member 11	nonsynonymous SNV	p.R164H	rs765878290	0	0	0	N	ID=COSM928414,COSM928415;OCCURENCE=1(lung),1(endometrium)	.
chr11	57996170	57996170	G	A	exonic	OR10Q1	olfactory receptor family 10 subfamily Q member 1	nonsynonymous SNV	p.R60C	rs770134300	0	0	0	N	ID=COSM4034160;OCCURENCE=1(stomach)	.
chr11	59424046	59424046	G	A	exonic	PATL1	PAT1 homolog 1, processing body mRNA decay factor	nonsynonymous SNV	p.R217W		0	0	0	N	ID=COSM6282875,COSM6282874;OCCURENCE=1(liver)	.
chr11	59630139	59630139	G	A	exonic	TCN1	transcobalamin 1	nonsynonymous SNV	p.R106C	rs200536092	0	0	0	N	ID=COSM382779;OCCURENCE=1(haematopoietic_and_lymphoid_tissue),1(skin),1(lung),1(endometrium)	.	CYANOCOBALAMIN; VITAMIN-B12
chr11	60164088	60164088	G	A	exonic	MS4A14	membrane spanning 4-domains A14	nonsynonymous SNV	p.V13I	rs371634910	0	0	0	N	ID=COSM467060;OCCURENCE=1(kidney)	.
chr11	60658694	60658694	C	T	exonic	PRPF19	pre-mRNA processing factor 19	nonsynonymous SNV	p.A487T	rs140004740	0	0	0	D	ID=COSM6756541;OCCURENCE=1(large_intestine)	.
chr11	60701105	60701105	G	A	exonic	TMEM132A	transmembrane protein 132A	nonsynonymous SNV	p.R484H		0	0	0	N	ID=COSM252875;OCCURENCE=1(ovary)	.
chr11	61507007	61507007	C	T	exonic	DAGLA	diacylglycerol lipase alpha	nonsynonymous SNV	p.T576I		0	0	0	N	ID=COSM5373014;OCCURENCE=1(skin)	.
chr11	62334440	62334440	C	T	exonic	EEF1G	eukaryotic translation elongation factor 1 gamma	nonsynonymous SNV	p.R282Q		0	0	0	N	ID=COSM1250957;OCCURENCE=1(oesophagus)	.
chr11	64116824	64116824	C	T	exonic	CCDC88B	coiled-coil domain containing 88B	nonsynonymous SNV	p.R880W	rs779565460	0	0	0	N	ID=COSM4670083,COSM4670084;OCCURENCE=1(large_intestine)	.
chr11	64863791	64863791	G	-	exonic	VPS51	VPS51, GARP complex subunit	frameshift deletion	p.E25fs		0	0	0		ID=COSM4614681;OCCURENCE=2(large_intestine)	.
chr11	64875371	64875371	G	A	exonic	VPS51	VPS51, GARP complex subunit	nonsynonymous SNV	p.R201H	rs757550478	0	0	0	D	ID=COSM239002;OCCURENCE=1(prostate),1(large_intestine)	.
chr11	64880993	64880993	G	A	exonic	TM7SF2	transmembrane 7 superfamily member 2	nonsynonymous SNV	p.R177Q	rs760865565	0	0	0	D	ID=COSM2165100;OCCURENCE=1(breast)	.
chr11	64883043	64883043	A	G	exonic	TM7SF2	transmembrane 7 superfamily member 2	nonsynonymous SNV	p.M357V		0	0	0	D	ID=COSM4035334;OCCURENCE=1(stomach)	.
chr11	64889853	64889853	G	A	exonic	MRPL49	mitochondrial ribosomal protein L49	nonsynonymous SNV	p.G12E		0	0	0	N	ID=COSM4544589;OCCURENCE=1(skin)	.
chr11	65161844	65161844	C	T	exonic	FRMD8	FERM domain containing 8	nonsynonymous SNV	p.R177C	rs565617626	0	0	0	D	ID=COSM5658140,COSM5658139;OCCURENCE=1(lung)	.
chr11	65819988	65819988	G	A	exonic	SF3B2	splicing factor 3b subunit 2	nonsynonymous SNV	p.G45S		0	0	0	N	ID=COSM3451968;OCCURENCE=1(skin)	.
chr11	66311324	66311324	C	T	exonic	ZDHHC24	zinc finger DHHC-type containing 24	nonsynonymous SNV	p.R137Q	rs536081289	0	0	0	N	ID=COSM930783;OCCURENCE=1(endometrium)	.
chr11	66473194	66473194	C	T	exonic	SPTBN2	spectrin beta, non-erythrocytic 2	nonsynonymous SNV	p.V590I	rs780059779	0	0	0	N	ID=COSM4035839,COSM4035840;OCCURENCE=1(stomach),1(biliary_tract)	.
chr11	66638551	66638551	C	T	exonic	PC	pyruvate carboxylase	nonsynonymous SNV	p.R202H		0	0	0	D	ID=COSM4771280,COSM4771279;OCCURENCE=1(pleura)	.	AMPHOTERICIN B; CORTISOL
chr11	67287273	67287273	C	T	exonic	CABP2	calcium binding protein 2	nonsynonymous SNV	p.D210N		0	0	0	D	ID=COSM5373383;OCCURENCE=1(skin)	.
chr11	68197114	68197114	C	T	exonic	LRP5	LDL receptor related protein 5	nonsynonymous SNV	p.R1237W	rs771696099	0	0	0	D	ID=COSM5498028;OCCURENCE=1(biliary_tract)	.
chr11	68540771	68540771	C	T	exonic	CPT1A	carnitine palmitoyltransferase 1A	nonsynonymous SNV	p.A568T	rs1046804	0	0	0	D	ID=COSM298335;OCCURENCE=1(large_intestine)	.	PERHEXILINE; PERHEXILINE; PROPIONYL-L-CARNITINE
chr11	69625456	69625456	C	T	exonic	FGF3	fibroblast growth factor 3	nonsynonymous SNV	p.A113T	rs781938977	0	1	0	N	ID=COSM2043527;OCCURENCE=1(large_intestine)	.	HEPARAN SULFATE; Dovitinib; SORAFENIB; Lucitanib
chr11	70253452	70253452	G	A	exonic	CTTN	cortactin	nonsynonymous SNV	p.A17T	rs766315325	0	0	0	N	ID=COSM4639353,COSM4639351,COSM4639352;OCCURENCE=1(large_intestine)	.
chr11	70266595	70266595	C	T	exonic	CTTN	cortactin	stopgain	p.Q257X		0	0	0		ID=COSM4036310,COSM4036311,COSM4036312;OCCURENCE=1(stomach)	.
chr11	70666554	70666554	C	T	exonic	SHANK2	SH3 and multiple ankyrin repeat domains 2	unknown	p.G471R	rs532653877	0	0	0	N	ID=COSM4447910,COSM4447911;OCCURENCE=1(skin)	.
chr11	71293823	71293823	T	A	exonic	KRTAP5-11	keratin associated protein 5-11	nonsynonymous SNV	p.S21C	rs375942927	0	0	0	N	ID=COSM1212896;OCCURENCE=4(liver),1(large_intestine)	.
chr11	71948209	71948209	C	-	exonic	INPPL1	inositol polyphosphate phosphatase like 1	frameshift deletion	p.P976fs		0	0	0		ID=COSM4613274;OCCURENCE=1(stomach),5(large_intestine)	.	ANTISENSE OLIGONUCLEOTIDES; AS1949490
chr11	74638492	74638492	C	T	exonic	XRRA1	X-ray radiation resistance associated 1	nonsynonymous SNV	p.A148T	rs780026133	0	0	0	N	ID=COSM6824206;OCCURENCE=1(large_intestine)	.
chr11	74880266	74880266	C	T	exonic	SLCO2B1	solute carrier organic anion transporter family member 2B1	nonsynonymous SNV	p.S166L	rs750167927	0	0	0	N	ID=COSM1226623;OCCURENCE=2(urinary_tract),1(skin),1(large_intestine)	.	ROSIGLITAZONE; HUMAN CHORIONIC GONADOTROPIN
chr11	76062107	76062107	C	T	exonic	THAP12	THAP domain containing 12	nonsynonymous SNV	p.R696Q	rs34345847	0	0	0	N	ID=COSM4807912;OCCURENCE=1(pancreas),1(skin)	.
chr11	88300558	88300558	G	A	exonic	GRM5	glutamate metabotropic receptor 5	nonsynonymous SNV	p.P765S		0	0	0	D	ID=COSM3870369,COSM3870368;OCCURENCE=1(skin)	.	LY545694; DIPRAGLURANT; Raseglurant; ETHANOL; AZD2516; MGLURIII AGONIST AND MGLU5 ANTAGONIST; ADX10059; DHPG; STX107; AZD2066; ADX-48621; AZD2516; LY467711; RG7342; ADX10059; ACAMPROSATE; AZD2066; MCN3377; LY525327; MAVOGLURANT; BASIMGLURANT; AZD2066; STX107
chr11	92534059	92534059	C	T	exonic	FAT3	FAT atypical cadherin 3	nonsynonymous SNV	p.P2627L	rs766693054	0	0	0	N	ID=COSM4508818,COSM4508817;OCCURENCE=1(skin)	.
chr11	93170857	93170857	C	A	exonic	DEUP1	deuterosome assembly protein 1	nonsynonymous SNV	p.S596Y		0	0	0	N	ID=COSM1237732;OCCURENCE=1(thyroid)	.
chr11	93432241	93432241	C	T	exonic	CEP295	centrosomal protein 295	nonsynonymous SNV	p.S1388F		0	0	0	N	ID=COSM5533330,COSM5533329,COSM5533328;OCCURENCE=1(NS)	.
chr11	93432897	93432897	T	G	exonic	CEP295	centrosomal protein 295	nonsynonymous SNV	p.L1607V	rs780568001	0	0	0	N	ID=COSM5970431,COSM5970433,COSM5970432;OCCURENCE=2(upper_aerodigestive_tract)	.
chr11	94731285	94731285	C	T	exonic	KDM4D	lysine demethylase 4D	nonsynonymous SNV	p.S250L	rs782086850	0	0	0	D	ID=COSM2061639;OCCURENCE=1(ovary)	.
chr11	95826327	95826327	G	A	exonic	MAML2	mastermind like transcriptional coactivator 2	nonsynonymous SNV	p.P290S		0	0	0	N	ID=COSM4511441;OCCURENCE=1(skin)	.
chr11	100168386	100168386	G	A	exonic	CNTN5	contactin 5	nonsynonymous SNV	p.G782R	rs753838831	0	0	0	D	ID=COSM3764267,COSM3764266;OCCURENCE=1(central_nervous_system)	.
chr11	102201929	102201933	AAGGG	-	exonic	BIRC3	baculoviral IAP repeat containing 3	frameshift deletion	p.E429fs		0	0	0		ID=COSM1235198;OCCURENCE=3(haematopoietic_and_lymphoid_tissue)	.	AZD5582; AT-406; HGS1029; HGS 1029; AT-406; SM-337; BIRINAPANT; GDC0917; SM-122; LCL161; GDC-0152; BIRINAPANT
chr11	103907576	103907576	G	A	exonic	DDI1	DNA damage inducible 1 homolog 1	nonsynonymous SNV	p.R9Q		0	0	0	N	ID=COSM4165620,COSM4165619;OCCURENCE=1(kidney),1(skin)	.
chr11	107535837	107535837	C	T	exonic	ELMOD1	ELMO domain containing 1	nonsynonymous SNV	p.R307C	rs140465562	0	0	0	D	ID=COSM216486;OCCURENCE=1(NS),3(pancreas)	.
chr11	113076881	113076881	G	A	exonic	NCAM1	neural cell adhesion molecule 1	nonsynonymous SNV	p.D262N		0	0	0	N	ID=COSM4553986,COSM4553987,COSM4553988;OCCURENCE=1(skin)	.	ONCOLYSIN S; LORVOTUZUMAB MERTANSINE; LORVOTUZUMAB
chr11	113673924	113673924	C	-	exonic	USP28	ubiquitin specific peptidase 28	frameshift deletion	p.V940fs		0	0	0		ID=COSM1732886;OCCURENCE=1(pancreas),2(large_intestine)	.
chr11	116707841	116707841	C	T	exonic	APOA1	apolipoprotein A1	nonsynonymous SNV	p.E26K		0	0	0	D	ID=COSM6131302;OCCURENCE=1(lung)	.	PROTEIN SYNTHESIS INHIBITOR; RVX-208; TESTOSTERONE; PROTEIN PHOSPHATASE INHIBITOR; 3TC; RETINOIC ACID; GENERIC; PROGESTOGENS; FUROSEMIDE; CER-001; GLUCAGON; ETHANOL
chr11	117265078	117265078	C	T	exonic	CEP164	centrosomal protein 164	nonsynonymous SNV	p.R877W	rs986338516	0	0	0	N	ID=COSM5696387;OCCURENCE=1(lung)	.
chr11	117387194	117387194	C	T	exonic	DSCAML1	DS cell adhesion molecule like 1	nonsynonymous SNV	p.V651I	rs759589936	0	0	0	D	ID=COSM201997;OCCURENCE=1(large_intestine)	.
chr11	117789342	117789342	T	C	exonic	TMPRSS13	transmembrane protease, serine 13	nonsynonymous SNV	p.Q78R	rs75037497	0	0	0	N	ID=COSM1746061,COSM3749137,COSM1746060;OCCURENCE=5(ovary),1(bone),13(haematopoietic_and_lymphoid_tissue),4(stomach),8(urinary_tract),5(pancreas),2(skin),1(prostate),1(lung),5(thyroid),5(large_intestine)	.
chr11	119058114	119058114	C	T	exonic	PDZD3	PDZ domain containing 3	nonsynonymous SNV	p.R222W	rs140060249	0	0	0	N	ID=COSM4018510,COSM4018509;OCCURENCE=1(stomach)	.
chr11	119213688	119213688	G	-	exonic	MFRP	membrane frizzled-related protein	frameshift deletion	p.H384fs	rs757712621	0	0	0		ID=COSM1180748;OCCURENCE=1(stomach),2(oesophagus),8(large_intestine),2(biliary_tract)	.
chr11	123477491	123477491	G	A	exonic	GRAMD1B	GRAM domain containing 1B	nonsynonymous SNV	p.D364N	rs751049869	0	0	0	N	ID=COSM5531930,COSM5531931;OCCURENCE=1(NS)	.
chr11	123516367	123516367	C	T	exonic	SCN3B	sodium voltage-gated channel beta subunit 3	nonsynonymous SNV	p.M49I		0	0	0	D	ID=COSM3868656;OCCURENCE=1(skin)	.	ZONISAMIDE
chr11	123624554	123624554	G	A	exonic	OR6X1	olfactory receptor family 6 subfamily X member 1	stopgain	p.R225X	rs143796976	0	0	0		ID=COSM1475139;OCCURENCE=1(large_intestine)	.
chr11	124190000	124190000	G	A	exonic	OR8D2	olfactory receptor family 8 subfamily D member 2 (gene/pseudogene)	nonsynonymous SNV	p.L32F	rs746287445	0	0	0	N	ID=COSM3444751;OCCURENCE=1(skin)	.
chr11	124294278	124294278	G	A	exonic	OR8B4	olfactory receptor family 8 subfamily B member 4 (gene/pseudogene)	stopgain	p.R164X		0	0	0		ID=COSM202975;OCCURENCE=1(central_nervous_system)	.
chr11	124755027	124755027	G	A	exonic	ROBO4	roundabout guidance receptor 4	nonsynonymous SNV	p.R971W	rs774960443	0	0	0	N	ID=COSM415283;OCCURENCE=1(urinary_tract),1(upper_aerodigestive_tract)	.
chr11	128680830	128680830	G	A	exonic	FLI1	Fli-1 proto-oncogene, ETS transcription factor	nonsynonymous SNV	p.V436I	rs764743895	0	0	0	N	ID=COSM924830;OCCURENCE=1(central_nervous_system),1(endometrium)	.
chr11	128781322	128781322	C	T	exonic	KCNJ5	potassium voltage-gated channel subfamily J member 5	nonsynonymous SNV	p.R52C		0	0	0	D	ID=COSM1352505;OCCURENCE=1(large_intestine)	.	FLUPIRTINE; GLIBENCLAMIDE; Amiloride; DALFAMPRIDINE; Verapamil
chr11	134062623	134062623	G	A	exonic	NCAPD3	non-SMC condensin II complex subunit D3	nonsynonymous SNV	p.A669V	rs769128076	0	0	0	N	ID=COSM4705823;OCCURENCE=1(large_intestine)	.
chr12	994256	994256	C	T	exonic	WNK1	WNK lysine deficient protein kinase 1	nonsynonymous SNV	p.P1927L	rs770873761	0	0	0	N	ID=COSM6822848,COSM2047412,COSM2047413;OCCURENCE=2(large_intestine)	.	PP1
chr12	1755207	1755207	G	A	exonic	WNT5B	Wnt family member 5B	nonsynonymous SNV	p.R290H	rs765799904	0	0	0	D	ID=COSM2003519;OCCURENCE=1(upper_aerodigestive_tract)	.
chr12	1993960	1993960	C	G	exonic	CACNA2D4	calcium voltage-gated channel auxiliary subunit alpha2delta 4	nonsynonymous SNV	p.E416Q		0	0	0	N	ID=COSM356713,COSM356712;OCCURENCE=1(lung),1(upper_aerodigestive_tract)	.	BEPRIDIL HYDROCHLORIDE; ATAGABALIN; GABAPENTIN; GABAPENTIN ENACARBIL; PREGABALIN; IMAGABALIN
chr12	1993968	1993968	G	A	exonic	CACNA2D4	calcium voltage-gated channel auxiliary subunit alpha2delta 4	nonsynonymous SNV	p.P413L	rs758961705	0	0	0	N	ID=COSM6876035,COSM6876034;OCCURENCE=1(skin)	.	BEPRIDIL HYDROCHLORIDE; ATAGABALIN; GABAPENTIN; GABAPENTIN ENACARBIL; PREGABALIN; IMAGABALIN
chr12	2786965	2786965	G	A	exonic	CACNA1C	calcium voltage-gated channel subunit alpha1 C	nonsynonymous SNV	p.A1675T	rs773930851	0	0	0	D	ID=COSM1299282,COSM5346521,COSM1299286,COSM1299283,COSM1299284,COSM1299285;OCCURENCE=2(urinary_tract),1(large_intestine)	.	AMLODIPINE BESYLATE; VERAPAMIL; ELPETRIGINE; NISOLDIPINE; IMAGABALIN; ISRADIPINE; NIFEDIPINE; ATAGABALIN; [3H](+)-ISRADIPINE; VERAPAMIL HYDROCHLORIDE; NISOLDIPINE; IBUTILIDE; IBUTILIDE; NICARDIPINE; CALCISEPTINE; VERAPAMIL; AMLODIPINE; DILTIAZEM; FELODIPINE; CLEVIDIPINE; DILTIAZEM HYDROCHLORIDE; NICARDIPINE; VERAPAMIL; BEPRIDIL HYDROCHLORIDE; PREGABALIN; CLEVIDIPINE; GABAPENTIN ENACARBIL; NIMODIP…
chr12	2797857	2797857	G	C	exonic	CACNA1C	calcium voltage-gated channel subunit alpha1 C	nonsynonymous SNV	p.R2081T		0	0	0	N	ID=COSM5003001,COSM5002998,COSM5003002,COSM5003000,COSM5003003,COSM5002999;OCCURENCE=1(breast),1(pancreas)	.	AMLODIPINE BESYLATE; VERAPAMIL; ELPETRIGINE; NISOLDIPINE; IMAGABALIN; ISRADIPINE; NIFEDIPINE; ATAGABALIN; [3H](+)-ISRADIPINE; VERAPAMIL HYDROCHLORIDE; NISOLDIPINE; IBUTILIDE; IBUTILIDE; NICARDIPINE; CALCISEPTINE; VERAPAMIL; AMLODIPINE; DILTIAZEM; FELODIPINE; CLEVIDIPINE; DILTIAZEM HYDROCHLORIDE; NICARDIPINE; VERAPAMIL; BEPRIDIL HYDROCHLORIDE; PREGABALIN; CLEVIDIPINE; GABAPENTIN ENACARBIL; NIMODIP…
chr12	4736273	4736273	G	A	exonic	AKAP3	A-kinase anchoring protein 3	nonsynonymous SNV	p.R599W	rs374391591	0	0	0	N	ID=COSM6597713,COSM6597712;OCCURENCE=2(large_intestine)	.
chr12	4920057	4920057	G	A	exonic	KCNA6	potassium voltage-gated channel subfamily A member 6	nonsynonymous SNV	p.A284T		0	0	0	D	ID=COSM1255231;OCCURENCE=1(oesophagus)	.	α-DENDROTOXIN; GUANIDINE HYDROCHLORIDE; NERISPIRDINE; CHARYBDOTOXIN; TEDISAMIL; TETRAETHYLAMMONIUM; MAST CELL DEGRANULATING PEPTIDE; DALFAMPRIDINE
chr12	6438510	6438510	C	T	exonic	TNFRSF1A	TNF receptor superfamily member 1A	nonsynonymous SNV	p.A446T		0	0	0	N	ID=COSM6225654;OCCURENCE=1(large_intestine)	.	UVB; CYCLOPHOSPHAMIDE; CYT-6091
chr12	6457284	6457284	G	A	exonic	SCNN1A	sodium channel epithelial 1 alpha subunit	stopgain	p.R648X		0	0	0		ID=COSM6884379,COSM6884380;OCCURENCE=1(skin)	.	TRIAMTERENE; TRIAMTERENE; GS-9411; AMILORIDE; TRIAMTERENE; AMILORIDE; AMILORIDE HYDROCHLORIDE; P-552; TRIAMTERENE; AMILORIDE; P-1037
chr12	6729435	6729435	G	A	exonic	LPAR5	lysophosphatidic acid receptor 5	nonsynonymous SNV	p.A327V	rs773509181	0	0	0	N	ID=COSM4749362;OCCURENCE=1(stomach)	.	FARNESYL DIPHOSPHATE; LPA; FARNESYL MONOPHOSPHATE; N-ARACHIDONOYLGLYCINE; TCLPA5
chr12	6965312	6965312	C	T	exonic	USP5	ubiquitin specific peptidase 5	nonsynonymous SNV	p.R146W	rs369790819	0	0	0	N	ID=COSM2099658,COSM179597;OCCURENCE=1(skin),1(thyroid)	.	VIALININ A
chr12	7556179	7556179	C	T	exonic	CD163L1	CD163 molecule like 1	nonsynonymous SNV	p.A464T	rs749811057	0	0	0	N	ID=COSM6477610;OCCURENCE=1(lung)	.
chr12	10601919	10601919	C	T	exonic	KLRC1	killer cell lectin like receptor C1	nonsynonymous SNV	p.E136K	rs372070161	0	0	0	N	ID=COSM5839977;OCCURENCE=1(NS)	.	MONALIZUMAB
chr12	10962038	10962038	G	A	exonic	TAS2R9	taste 2 receptor member 9	stopgain	p.R213X	rs758789858	0	0	0		ID=COSM3455750;OCCURENCE=2(skin)	.
chr12	11546677	11546677	C	T	exonic	PRB2	proline rich protein BstNI subfamily 2	nonsynonymous SNV	p.R112Q	rs201144571	0	0	0	N	ID=COSM4767708,COSM4767709;OCCURENCE=1(haematopoietic_and_lymphoid_tissue),1(liver),2(thyroid),1(large_intestine),1(biliary_tract)	.
chr12	11546749	11546749	T	C	exonic	PRB2	proline rich protein BstNI subfamily 2	nonsynonymous SNV	p.K88R	rs563776867	0	0	0	N	ID=COSM4203573,COSM4203574;OCCURENCE=1(pancreas),2(lung),2(thyroid)	.
chr12	12317235	12317235	C	T	exonic	LRP6	LDL receptor related protein 6	nonsynonymous SNV	p.R675Q	rs376188127	0	0	0	D	ID=COSM168429;OCCURENCE=3(large_intestine),1(endometrium)	.
chr12	12630327	12630327	G	A	exonic	DUSP16	dual specificity phosphatase 16	stopgain	p.Q480X		0	0	0		ID=COSM5341948;OCCURENCE=1(pancreas),1(large_intestine)	.
chr12	13224212	13224212	G	T	exonic	FAM234B	family with sequence similarity 234 member B	nonsynonymous SNV	p.W469L		0	0	0	N	ID=COSM6250576;OCCURENCE=1(liver)	.
chr12	20885986	20885986	G	T	exonic	SLCO1C1	solute carrier organic anion transporter family member 1C1	nonsynonymous SNV	p.A444S	rs748723485	0	0	0	N	ID=COSM378148;OCCURENCE=1(lung)	.	TAUROCHOLIC ACID; PROBENECID; [3H]BSP; [125I]THYROXINE; DPDPE; [3H]ESTRONE-3-SULPHATE
chr12	21011495	21011495	T	G	exonic	SLCO1B3	solute carrier organic anion transporter family member 1B3	nonsynonymous SNV	p.F117V		0	0	0	N	ID=COSM4040751;OCCURENCE=1(stomach),1(large_intestine)	.	RIFAMYCIN SV; [3H]ESTRADIOL-17β-GLUCURONIDE; [3H]BSP; RIFAMPICIN; GEMFIBROZIL; GLYCYRRHIZIN; [3H]CCK-8 (HUMAN, MOUSE, RAT); SILDENAFIL; CYCLOSPORIN A
chr12	22623827	22623827	C	T	exonic	C2CD5	C2 calcium dependent domain containing 5	nonsynonymous SNV	p.A806T	rs750393334	0	0	0	N	ID=COSM938051,COSM938052;OCCURENCE=1(endometrium)	.
chr12	25378562	25378562	C	T	exonic	KRAS	KRAS proto-oncogene, GTPase	nonsynonymous SNV	p.A146T	rs121913527	0	1	A146T	D	ID=COSM19404,COSM1165198;OCCURENCE=2(stomach),29(haematopoietic_and_lymphoid_tissue),1(urinary_tract),3(pancreas),1(peritoneum),1(genital_tract),1(skin),1(upper_aerodigestive_tract),128(large_intestine),2(small_intestine),3(biliary_tract),2(endometrium)	Cetuximab, MEK inhibitors	lenalidomide; GA201; 3144; Selumetinib; BKM120; Gefitinib; CGM097; IRX4204; MK2206; Radiotherapy; Sorafenib; SCH772984; CISPLATIN; ERLOTINIB; CHEMOTHERAPY; APS-2-79; GDC0879; KO-947; AZD8186; Vemurafenib; PEMBROLIZUMAB; Ipatasertib; Cabozantinib; Trametinib; GI-4000; PANITUMUMAB; AZD5363; LY3009120; Lapatinib; RAFAMETINIB; KO-947; CETUXIMAB; GDC-0068; Cetuximab; DEL-22379; Cetuximab; NS1; BCL2 in…	Colorectal Cancer,EL:R1:Panitumumab, Cetuximab(21228335, 20619739, 18316791, 20921465, 24024839) ; Non-Small Cell Lung Cancer,EL:4:Binimetinib, Trametinib(25801412, 23934108, 22805291, 24746704, 28783719) ; All Tumors,EL:4:LY3214996, KO-947, GDC-0994(22805291, 15483017, 28783719)
chr12	25378648	25378648	T	C	exonic	KRAS	KRAS proto-oncogene, GTPase	nonsynonymous SNV	p.K117R		0	1	K117R	D	ID=COSM4696722,COSM4696721;OCCURENCE=2(large_intestine)	Cetuximab, MEK inhibitors	lenalidomide; GA201; 3144; Selumetinib; BKM120; Gefitinib; CGM097; IRX4204; MK2206; Radiotherapy; Sorafenib; SCH772984; CISPLATIN; ERLOTINIB; CHEMOTHERAPY; APS-2-79; GDC0879; KO-947; AZD8186; Vemurafenib; PEMBROLIZUMAB; Ipatasertib; Cabozantinib; Trametinib; GI-4000; PANITUMUMAB; AZD5363; LY3009120; Lapatinib; RAFAMETINIB; KO-947; CETUXIMAB; GDC-0068; Cetuximab; DEL-22379; Cetuximab; NS1; BCL2 in…	Colorectal Cancer,EL:R1:Panitumumab, Cetuximab(21228335, 20619739, 18316791, 20921465, 24024839) ; Non-Small Cell Lung Cancer,EL:4:Binimetinib, Trametinib(25801412, 23934108, 22805291, 24746704, 28783719) ; All Tumors,EL:4:LY3214996, KO-947, GDC-0994(22805291, 15483017, 28783719)
chr12	25398282	25398282	C	G	exonic	KRAS	KRAS proto-oncogene, GTPase	nonsynonymous SNV	p.G13R	rs121913535	0	1	G13R	D	ID=COSM3384258,COSM529;OCCURENCE=1(ovary),1(haematopoietic_and_lymphoid_tissue),1(soft_tissue),1(urinary_tract),4(pancreas),1(peritoneum),6(lung),2(thyroid),45(large_intestine),4(biliary_tract)	Cetuximab, MEK inhibitors	lenalidomide; GA201; 3144; Selumetinib; BKM120; Gefitinib; CGM097; IRX4204; MK2206; Radiotherapy; Sorafenib; SCH772984; CISPLATIN; ERLOTINIB; CHEMOTHERAPY; APS-2-79; GDC0879; KO-947; AZD8186; Vemurafenib; PEMBROLIZUMAB; Ipatasertib; Cabozantinib; Trametinib; GI-4000; PANITUMUMAB; AZD5363; LY3009120; Lapatinib; RAFAMETINIB; KO-947; CETUXIMAB; GDC-0068; Cetuximab; DEL-22379; Cetuximab; NS1; BCL2 in…	Colorectal Cancer,EL:R1:Panitumumab, Cetuximab(21228335, 20619739, 18316791, 20921465, 24024839) ; Non-Small Cell Lung Cancer,EL:4:Binimetinib, Trametinib(25801412, 23934108, 22805291, 24746704, 28783719) ; All Tumors,EL:4:LY3214996, KO-947, GDC-0994(22805291, 15483017, 28783719)
chr12	25398284	25398284	C	T	exonic	KRAS	KRAS proto-oncogene, GTPase	nonsynonymous SNV	p.G12D	rs121913529	0	1	G12D	D	ID=COSM1135366,COSM521;OCCURENCE=1(salivary_gland),321(ovary),23(breast),17(NS),2(penis),218(haematopoietic_and_lymphoid_tissue),106(stomach),7(kidney),23(urinary_tract),28(soft_tissue),2985(pancreas),18(liver),95(peritoneum),1(genital_tract),16(oesophagus),20(gastrointestinal_tract_(site_indeterminate)),39(skin),22(prostate),1273(lung),24(cervix),37(thyroid),33(upper_aerodigestive_tract),2(testi…	Cetuximab, MEK inhibitors	lenalidomide; GA201; 3144; Selumetinib; BKM120; Gefitinib; CGM097; IRX4204; MK2206; Radiotherapy; Sorafenib; SCH772984; CISPLATIN; ERLOTINIB; CHEMOTHERAPY; APS-2-79; GDC0879; KO-947; AZD8186; Vemurafenib; PEMBROLIZUMAB; Ipatasertib; Cabozantinib; Trametinib; GI-4000; PANITUMUMAB; AZD5363; LY3009120; Lapatinib; RAFAMETINIB; KO-947; CETUXIMAB; GDC-0068; Cetuximab; DEL-22379; Cetuximab; NS1; BCL2 in…	Colorectal Cancer,EL:R1:Panitumumab, Cetuximab(21228335, 20619739, 18316791, 20921465, 24024839) ; Non-Small Cell Lung Cancer,EL:4:Binimetinib, Trametinib(25801412, 23934108, 22805291, 24746704, 28783719) ; All Tumors,EL:4:LY3214996, KO-947, GDC-0994(22805291, 15483017, 28783719)
chr12	25398284	25398284	C	A	exonic	KRAS	KRAS proto-oncogene, GTPase	nonsynonymous SNV	p.G12V	rs121913529	0	1	G12V	D	ID=COSM1140133,COSM520;OCCURENCE=1(vulva),2(pleura),310(ovary),13(breast),10(NS),38(stomach),74(haematopoietic_and_lymphoid_tissue),6(kidney),6(soft_tissue),21(urinary_tract),1939(pancreas),7(liver),36(peritoneum),4(oesophagus),7(genital_tract),1(autonomic_ganglia),11(gastrointestinal_tract_(site_indeterminate)),29(skin),40(prostate),1476(lung),20(thyroid),12(cervix),4(upper_aerodigestive_tract),…	Cetuximab, MEK inhibitors	lenalidomide; GA201; 3144; Selumetinib; BKM120; Gefitinib; CGM097; IRX4204; MK2206; Radiotherapy; Sorafenib; SCH772984; CISPLATIN; ERLOTINIB; CHEMOTHERAPY; APS-2-79; GDC0879; KO-947; AZD8186; Vemurafenib; PEMBROLIZUMAB; Ipatasertib; Cabozantinib; Trametinib; GI-4000; PANITUMUMAB; AZD5363; LY3009120; Lapatinib; RAFAMETINIB; KO-947; CETUXIMAB; GDC-0068; Cetuximab; DEL-22379; Cetuximab; NS1; BCL2 in…	Colorectal Cancer,EL:R1:Panitumumab, Cetuximab(21228335, 20619739, 18316791, 20921465, 24024839) ; Non-Small Cell Lung Cancer,EL:4:Binimetinib, Trametinib(25801412, 23934108, 22805291, 24746704, 28783719) ; All Tumors,EL:4:LY3214996, KO-947, GDC-0994(22805291, 15483017, 28783719)
chr12	25398285	25398285	C	G	exonic	KRAS	KRAS proto-oncogene, GTPase	nonsynonymous SNV	p.G12R	rs121913530	0	1	G12R	D	ID=COSM518,COSM1157797;OCCURENCE=30(ovary),8(bone),8(breast),2(NS),1(stomach),22(haematopoietic_and_lymphoid_tissue),7(urinary_tract),796(pancreas),1(peritoneum),1(oesophagus),2(gastrointestinal_tract_(site_indeterminate)),5(skin),1(prostate),101(lung),2(cervix),19(thyroid),2(upper_aerodigestive_tract),4(testis),292(large_intestine),2(central_nervous_system),3(small_intestine),27(biliary_tract),4…	Cetuximab, MEK inhibitors	lenalidomide; GA201; 3144; Selumetinib; BKM120; Gefitinib; CGM097; IRX4204; MK2206; Radiotherapy; Sorafenib; SCH772984; CISPLATIN; ERLOTINIB; CHEMOTHERAPY; APS-2-79; GDC0879; KO-947; AZD8186; Vemurafenib; PEMBROLIZUMAB; Ipatasertib; Cabozantinib; Trametinib; GI-4000; PANITUMUMAB; AZD5363; LY3009120; Lapatinib; RAFAMETINIB; KO-947; CETUXIMAB; GDC-0068; Cetuximab; DEL-22379; Cetuximab; NS1; BCL2 in…	Colorectal Cancer,EL:R1:Panitumumab, Cetuximab(21228335, 20619739, 18316791, 20921465, 24024839) ; Non-Small Cell Lung Cancer,EL:4:Binimetinib, Trametinib(25801412, 23934108, 22805291, 24746704, 28783719) ; All Tumors,EL:4:LY3214996, KO-947, GDC-0994(22805291, 15483017, 28783719)
chr12	25398285	25398285	C	A	exonic	KRAS	KRAS proto-oncogene, GTPase	nonsynonymous SNV	p.G12C	rs121913530	0	1	G12C	D	ID=COSM1140136,COSM516;OCCURENCE=45(ovary),11(breast),2(penis),10(NS),16(stomach),26(haematopoietic_and_lymphoid_tissue),4(kidney),17(soft_tissue),15(urinary_tract),174(pancreas),6(liver),11(peritoneum),2(oesophagus),1(genital_tract),4(gastrointestinal_tract_(site_indeterminate)),1(adrenal_gland),7(skin),10(prostate),2330(lung),3(cervix),18(thyroid),8(upper_aerodigestive_tract),2(testis),1927(lar…	Cetuximab, MEK inhibitors	lenalidomide; GA201; 3144; Selumetinib; BKM120; Gefitinib; CGM097; IRX4204; MK2206; Radiotherapy; Sorafenib; SCH772984; CISPLATIN; ERLOTINIB; CHEMOTHERAPY; APS-2-79; GDC0879; KO-947; AZD8186; Vemurafenib; PEMBROLIZUMAB; Ipatasertib; Cabozantinib; Trametinib; GI-4000; PANITUMUMAB; AZD5363; LY3009120; Lapatinib; RAFAMETINIB; KO-947; CETUXIMAB; GDC-0068; Cetuximab; DEL-22379; Cetuximab; NS1; BCL2 in…	Colorectal Cancer,EL:R1:Panitumumab, Cetuximab(21228335, 20619739, 18316791, 20921465, 24024839) ; Non-Small Cell Lung Cancer,EL:4:Binimetinib, Trametinib(25801412, 23934108, 22805291, 24746704, 28783719) ; All Tumors,EL:4:LY3214996, KO-947, GDC-0994(22805291, 15483017, 28783719)
chr12	26217559	26217559	C	T	exonic	RASSF8	Ras association domain family member 8	stopgain	p.R78X	rs746592311	0	0	0		ID=COSM4041013,COSM4041012;OCCURENCE=1(stomach)	.
chr12	39967591	39967591	C	T	exonic	ABCD2	ATP binding cassette subfamily D member 2	nonsynonymous SNV	p.E644K	rs749204245	0	0	0	D	ID=COSM236672;OCCURENCE=1(prostate)	.
chr12	40114902	40114902	T	C	exonic	C12orf40	chromosome 12 open reading frame 40	nonsynonymous SNV	p.V603A		0	0	0	N	ID=COSM3724765;OCCURENCE=1(lung)	.
chr12	41323612	41323612	C	T	exonic	CNTN1	contactin 1	nonsynonymous SNV	p.R171C	rs770683180	0	0	0	N	ID=COSM268918;OCCURENCE=1(large_intestine),1(endometrium)	.	S-ALLYLGLYCINE
chr12	41582469	41582469	G	A	exonic	PDZRN4	PDZ domain containing ring finger 4	nonsynonymous SNV	p.R71H		0	0	0	N	ID=COSM6743752;OCCURENCE=1(large_intestine)	.
chr12	41967451	41967451	G	A	exonic	PDZRN4	PDZ domain containing ring finger 4	nonsynonymous SNV	p.R957H		0	0	0	D	ID=COSM6743759,COSM6743760,COSM6743761;OCCURENCE=1(large_intestine)	.
chr12	46318686	46318686	C	T	exonic	SCAF11	SR-related CTD associated factor 11	nonsynonymous SNV	p.R1244H	rs762262046	0	0	0	N	ID=COSM303188;OCCURENCE=1(central_nervous_system)	.
chr12	48723171	48723171	C	T	exonic	H1FNT	H1 histone family member N, testis specific	stopgain	p.R33X		0	0	0		ID=COSM5645356;OCCURENCE=1(oesophagus)	.
chr12	49086818	49086818	A	T	exonic	CCNT1	cyclin T1	stoploss	pX727K	rs762651446	0	0	0		ID=COSM1284000;OCCURENCE=1(autonomic_ganglia),1(thyroid)	.
chr12	49420606	49420606	C	T	exonic	KMT2D	lysine methyltransferase 2D	nonsynonymous SNV	p.R5048H	rs886041404	1	0	0	D	ID=COSM215535,COSM2006665;OCCURENCE=1(bone),1(large_intestine),1(central_nervous_system)	.	Bicalutamide
chr12	49937715	49937715	C	T	exonic	KCNH3	potassium voltage-gated channel subfamily H member 3	nonsynonymous SNV	p.R281C		0	0	0	D	ID=COSM2007973;OCCURENCE=1(large_intestine)	.	DALFAMPRIDINE; NERISPIRDINE; CS+; GUANIDINE HYDROCHLORIDE; TEDISAMIL
chr12	51740409	51740409	T	G	exonic	CELA1	chymotrypsin like elastase family member 1	nonsynonymous SNV	p.Y5S	rs117443541	0	0	0	N	ID=COSM3765648;OCCURENCE=1(liver),1(skin),3(prostate),1(lung),1(large_intestine)	.	TELAPREVIR
chr12	51740410	51740410	A	G	exonic	CELA1	chymotrypsin like elastase family member 1	nonsynonymous SNV	p.Y5H	rs116944010	0	0	0	N	ID=COSM3765649;OCCURENCE=1(liver),1(oesophagus),3(prostate),1(lung),1(large_intestine)	.	TELAPREVIR
chr12	51740415	51740416	AC	-	exonic	CELA1	chymotrypsin like elastase family member 1	frameshift deletion	p.V3fs	rs796387461	0	0	0		ID=COSM301353;OCCURENCE=1(breast),1(liver),1(large_intestine),1(central_nervous_system),2(biliary_tract)	.	TELAPREVIR
chr12	52309864	52309864	G	A	exonic	ACVRL1	activin A receptor like type 1	nonsynonymous SNV	p.G379S	rs749510030	0	0	0	N	ID=COSM4423285,COSM4423284;OCCURENCE=1(large_intestine),1(central_nervous_system)	.	ACE-041; DALANTERCEPT; Panulisib; DALANTERCEPT; PF-03446962
chr12	52379131	52379131	C	T	exonic	ACVR1B	activin A receptor type 1B	stopgain	p.R420X		0	0	0		ID=COSM431315,COSM431314;OCCURENCE=1(breast),1(stomach)	.	COMPOUND 13D [PMID: 23639540]; EW-7197; COMPOUND 13R [PMID: 23639540]
chr12	53005046	53005046	G	C	exonic	KRT73	keratin 73	stopgain	p.S351X		0	0	0		ID=COSM6574110;OCCURENCE=1(breast)	.
chr12	53045615	53045615	-	CCTCCAAAGCCGCTGCCG	exonic	KRT2	keratin 2	nonframeshift insertion	p.G104delinsGGSGFGG	rs532019270	0	0	0		ID=COSM1362558;OCCURENCE=1(large_intestine)	.
chr12	53097124	53097124	G	A	exonic	KRT77	keratin 77	nonsynonymous SNV	p.P32L	rs529887183	0	0	0	D	ID=COSM1931891;OCCURENCE=1(skin),5(large_intestine)	.
chr12	53588065	53588065	C	T	exonic	ITGB7	integrin subunit beta 7	nonsynonymous SNV	p.E409K	rs771135540	0	0	0	N	ID=COSM5753959;OCCURENCE=2(large_intestine)	.	FIRATEGRAST; VEDOLIZUMAB; R1295; RHUMAB BETA7; VEDOLIZMAB; VEDOLIZUMAB; VEDOLIZUMAB; ETROLIZUMAB; NATALIZUMAB; ETROLIZUMAB
chr12	53910974	53910974	G	A	exonic	ATF7	activating transcription factor 7	nonsynonymous SNV	p.P478S	rs866863073	0	0	0	N	ID=COSM5651153,COSM5651152;OCCURENCE=1(haematopoietic_and_lymphoid_tissue),1(large_intestine)	.
chr12	54423666	54423666	G	A	exonic	HOXC6	homeobox C6	nonsynonymous SNV	p.G210S		0	0	0	N	ID=COSM4168849;OCCURENCE=1(peritoneum)	.
chr12	55038966	55038966	C	T	exonic	DCD	dermcidin	nonsynonymous SNV	p.V94M	rs755072961	0	0	0	N	ID=COSM1736719;OCCURENCE=1(stomach),2(haematopoietic_and_lymphoid_tissue),1(central_nervous_system)	.
chr12	56755194	56755194	C	T	exonic	APOF	apolipoprotein F	nonsynonymous SNV	p.A266T	rs758037147	0	0	0	N	ID=COSM3398902;OCCURENCE=1(central_nervous_system)	.
chr12	56822139	56822139	G	A	exonic	TIMELESS	timeless circadian regulator	stopgain	p.R487X	rs747106203	0	0	0		ID=COSM1363106;OCCURENCE=1(liver),1(large_intestine)	.
chr12	57390040	57390040	C	A	exonic	GPR182	G protein-coupled receptor 182	stopgain	p.C349X		0	0	0		ID=COSM4975499;OCCURENCE=2(oesophagus)	.
chr12	57587774	57587774	G	A	exonic	LRP1	LDL receptor related protein 1	nonsynonymous SNV	p.A2633T	rs757577718	0	0	0	D	ID=COSM71476;OCCURENCE=1(ovary),1(large_intestine)	.	ANTISENSE OLIGONUCLEOTIDES
chr12	57864936	57864936	C	T	exonic	GLI1	GLI family zinc finger 1	stopgain	p.R805X	rs1050431269	0	1	0		ID=COSM3730282;OCCURENCE=1(stomach)	.	ALL-TRANS RETINOIC ACID
chr12	57872994	57872994	G	A	exonic	ARHGAP9	Rho GTPase activating protein 9	nonsynonymous SNV	p.R137C	rs367755619	0	0	0	N	ID=COSM431582;OCCURENCE=4(ovary),1(oesophagus),1(adrenal_gland),1(prostate),6(large_intestine),1(central_nervous_system)	.
chr12	57963940	57963940	G	A	exonic	KIF5A	kinesin family member 5A	nonsynonymous SNV	p.D430N		0	0	0	D	ID=COSM5782023;OCCURENCE=1(breast)	.
chr12	58001299	58001299	G	A	exonic	DTX3	deltex E3 ubiquitin ligase 3	nonsynonymous SNV	p.R221Q		0	0	0	N	ID=COSM6032683,COSM6032682;OCCURENCE=1(large_intestine)	.
chr12	65563434	65563434	C	G	exonic	LEMD3	LEM domain containing 3	nonsynonymous SNV	p.Q20E	rs748067865	0	0	0	N	ID=COSM3792892;OCCURENCE=1(urinary_tract)	.
chr12	65847568	65847568	C	T	exonic	MSRB3	methionine sulfoxide reductase B3	nonsynonymous SNV	p.S125F	rs867671100	0	0	0	D	ID=COSM3464268,COSM3464267;OCCURENCE=2(skin)	.
chr12	66911726	66911726	C	T	exonic	GRIP1	glutamate receptor interacting protein 1	nonsynonymous SNV	p.R178H	rs367635870	0	0	0	N	ID=COSM3399011,COSM2098354;OCCURENCE=1(large_intestine),1(central_nervous_system)	.
chr12	66932930	66932930	C	T	exonic	GRIP1	glutamate receptor interacting protein 1	nonsynonymous SNV	p.E116K		0	0	0	N	ID=COSM6675673,COSM6675672;OCCURENCE=1(large_intestine)	.
chr12	68051507	68051507	C	T	exonic	DYRK2	dual specificity tyrosine phosphorylation regulated kinase 2	nonsynonymous SNV	p.R274W	rs201048832	0	0	0	N	ID=COSM5643355;OCCURENCE=1(oesophagus)	.	COMPOUND 5B [PMID: 24900464]; COMPOUND 3B [PMID: 23454515]; LEUCETTINE L41
chr12	71946959	71946959	G	A	exonic	LGR5	leucine rich repeat containing G protein-coupled receptor 5	nonsynonymous SNV	p.V179I	rs565985845	0	0	0	N	ID=COSM1364057;OCCURENCE=1(large_intestine)	.	R-SPONDIN-3; R-SPONDIN-4; R-SPONDIN-2; R-SPONDIN-1
chr12	73012771	73012771	C	T	exonic	TRHDE	thyrotropin releasing hormone degrading enzyme	nonsynonymous SNV	p.P763S		0	0	0	N	ID=COSM1705941;OCCURENCE=5(skin)	.
chr12	75692670	75692670	G	A	exonic	CAPS2	calcyphosine 2	stopgain	p.R330X	rs557269709	0	0	0		ID=COSM4514811,COSM4514810;OCCURENCE=1(skin)	.
chr12	75875797	75875797	G	A	exonic	GLIPR1	GLI pathogenesis related 1	nonsynonymous SNV	p.E120K	rs574219796	0	0	0	D	ID=COSM1705952;OCCURENCE=3(skin)	.
chr12	78443859	78443859	C	T	exonic	NAV3	neuron navigator 3	nonsynonymous SNV	p.R704C		0	0	0	N	ID=COSM5841935,COSM5841934;OCCURENCE=1(NS)	.
chr12	78513169	78513169	T	G	exonic	NAV3	neuron navigator 3	nonsynonymous SNV	p.F1065V		0	0	0	D	ID=COSM4705596,COSM4705597;OCCURENCE=2(large_intestine)	.
chr12	78569091	78569091	C	T	exonic	NAV3	neuron navigator 3	nonsynonymous SNV	p.R1663C	rs753543301	0	0	0	D	ID=COSM3664894,COSM3664895;OCCURENCE=2(oesophagus)	.
chr12	78571018	78571018	C	T	exonic	NAV3	neuron navigator 3	nonsynonymous SNV	p.P1741L	rs148932437	0	0	0	D	ID=COSM4757913,COSM4757912;OCCURENCE=1(stomach)	.
chr12	79747321	79747321	G	A	exonic	SYT1	synaptotagmin 1	nonsynonymous SNV	p.V284I		0	0	0	D	ID=COSM468942;OCCURENCE=1(kidney)	.
chr12	94761622	94761622	G	A	exonic	CEP83	centrosomal protein 83	nonsynonymous SNV	p.R431W	rs111647062	0	0	0	N	ID=COSM6622210;OCCURENCE=1(large_intestine)	.
chr12	96350667	96350667	G	A	exonic	AMDHD1	amidohydrolase domain containing 1	nonsynonymous SNV	p.V172M		0	0	0	D	ID=COSM1182667;OCCURENCE=1(large_intestine),1(biliary_tract)	.
chr12	101750392	101750392	G	A	exonic	UTP20	UTP20, small subunit processome component	nonsynonymous SNV	p.V1819I	rs768218728	0	0	0	D	ID=COSM4739997;OCCURENCE=2(large_intestine)	.
chr12	104089379	104089379	C	T	exonic	STAB2	stabilin 2	nonsynonymous SNV	p.R1143W	rs150636745	0	0	0	N	ID=COSM4437539;OCCURENCE=1(oesophagus),1(large_intestine)	.	ALBUMIN
chr12	104155079	104155079	C	T	exonic	STAB2	stabilin 2	nonsynonymous SNV	p.T2417M	rs529403514	0	0	0	D	ID=COSM78586;OCCURENCE=1(ovary)	.	ALBUMIN
chr12	104186945	104186945	C	T	exonic	NT5DC3	5'-nucleotidase domain containing 3	nonsynonymous SNV	p.R339Q		0	0	0	N	ID=COSM2153248,COSM2153247;OCCURENCE=2(central_nervous_system)	.
chr12	109186442	109186442	G	A	exonic	SSH1	slingshot protein phosphatase 1	nonsynonymous SNV	p.P505S		0	0	0	N	ID=COSM6790772,COSM6790771;OCCURENCE=1(large_intestine)	.
chr12	109520726	109520726	G	A	exonic	USP30	ubiquitin specific peptidase 30	nonsynonymous SNV	p.V343M	rs775161916	0	0	0	D	ID=COSM6818514;OCCURENCE=1(large_intestine)	.
chr12	112888210	112888210	G	A	exonic	PTPN11	protein tyrosine phosphatase, non-receptor type 11	nonsynonymous SNV	p.E76K	rs121918464	0	1	E76K	D	ID=COSM13000;OCCURENCE=1(breast),109(haematopoietic_and_lymphoid_tissue),1(skin),1(lung),1(large_intestine)	.	II-B08; U0126; cryptotanshinone; PLX4720; Refametinib; N/A; STIBOGLUCONATE; PD98059
chr12	113435383	113435383	C	T	exonic	OAS2	2'-5'-oligoadenylate synthetase 2	nonsynonymous SNV	p.T229M	rs200589437	0	0	0	D	ID=COSM430382;OCCURENCE=1(breast)	.
chr12	113496196	113496196	G	A	exonic	DTX1	deltex E3 ubiquitin ligase 1	nonsynonymous SNV	p.A67T	rs764835647	0	0	0	N	ID=COSM5510630;OCCURENCE=1(biliary_tract)	.
chr12	119592088	119592088	C	T	exonic	SRRM4	serine/arginine repetitive matrix 4	nonsynonymous SNV	p.R478W		0	0	0	N	ID=COSM3935763,COSM3935762,COSM3935761;OCCURENCE=1(oesophagus),1(large_intestine)	.
chr12	121603916	121603916	C	T	exonic	P2RX7	purinergic receptor P2X 7	nonsynonymous SNV	p.P224S		0	0	0	N	ID=COSM5840330;OCCURENCE=1(NS)	.	GSK1482160; AZD9056; BRILLIANT BLUE G; ATP; DECAVANADATE; GW791343; A438079; JNJ-479655; PF-04905428; A740003; A839977; GSK1482160; A804598; AZ10606120; EVT401; CHELERYTHRINE; AZD9056; KN62; IVERMECTIN; CE-224535; EVT-401; AZ11657312 (SALT FREE); AZ11645373
chr12	121858093	121858093	G	A	exonic	RNF34	ring finger protein 34	nonsynonymous SNV	p.D228N	rs558958221	0	0	0	N	ID=COSM1586287,COSM936024;OCCURENCE=1(endometrium)	.
chr12	123286212	123286212	G	A	exonic	CCDC62	coiled-coil domain containing 62	nonsynonymous SNV	p.E507K	rs569908909	0	0	0	N	ID=COSM268849;OCCURENCE=1(large_intestine)	.
chr12	124335508	124335508	G	A	exonic	DNAH10	dynein axonemal heavy chain 10	nonsynonymous SNV	p.R1941H	rs755158563	0	0	0	D	ID=COSM692466,COSM692465;OCCURENCE=1(lung),1(large_intestine)	.
chr12	132401025	132401025	C	T	exonic	ULK1	unc-51 like autophagy activating kinase 1	nonsynonymous SNV	p.T654M	rs370536132	0	0	0	N	ID=COSM6816574;OCCURENCE=1(large_intestine)	.	COMPOUND R-16 [PMID: 21967808]
chr12	133225975	133225975	G	A	exonic	POLE	DNA polymerase epsilon, catalytic subunit	nonsynonymous SNV	p.R1308W	rs763854815	1	0	0	D	ID=COSM6136323,COSM6136322;OCCURENCE=1(lung)	.	FLUDARABINE PHOSPHATE; PEMBROLIZUMAB; GEMCITABINE HYDROCHLORIDE; CLOFARABINE; CYTARABINE
chr12	133780587	133780587	G	A	exonic	ZNF268	zinc finger protein 268	nonsynonymous SNV	p.R772Q	rs373286359	0	0	0	N	ID=COSM937435;OCCURENCE=1(biliary_tract),1(endometrium)	.
chr13	20000614	20000614	T	A	exonic	TPTE2	transmembrane phosphoinositide 3-phosphatase and tensin homolog 2	nonsynonymous SNV	p.Y449F	rs77380319	0	0	0	N	ID=COSM4213369,COSM4213368;OCCURENCE=1(haematopoietic_and_lymphoid_tissue),1(liver),1(oesophagus),1(thyroid)	.
chr13	20000621	20000621	T	C	exonic	TPTE2	transmembrane phosphoinositide 3-phosphatase and tensin homolog 2	nonsynonymous SNV	p.N447D	rs528635259	0	0	0	N	ID=COSM6405888,COSM6405889;OCCURENCE=2(thyroid)	.
chr13	23912385	23912385	C	T	exonic	SACS	sacsin molecular chaperone	nonsynonymous SNV	p.R1877Q	rs772866081	0	0	0	D	ID=COSM946048,COSM1586933;OCCURENCE=1(large_intestine),2(endometrium)	.
chr13	24797392	24797392	C	T	exonic	SPATA13	spermatogenesis associated 13	nonsynonymous SNV	p.R109W	rs374680225	0	0	0	D	ID=COSM1188682,COSM1188683;OCCURENCE=1(lung),1(large_intestine)	.
chr13	25058867	25058867	C	T	exonic	PARP4	poly(ADP-ribose) polymerase family member 4	nonsynonymous SNV	p.V458I	rs143070451	0	0	0	N	ID=COSM432233;OCCURENCE=2(breast),1(haematopoietic_and_lymphoid_tissue),1(liver),1(thyroid)	.
chr13	25367434	25367434	G	A	exonic	RNF17	ring finger protein 17	nonsynonymous SNV	p.G397E		0	0	0	N	ID=COSM3467894,COSM3467895,COSM3467896;OCCURENCE=1(skin)	.
chr13	25744209	25744209	C	T	exonic	AMER2	APC membrane recruitment protein 2	nonsynonymous SNV	p.V517I		0	0	0	N	ID=COSM469280,COSM469281;OCCURENCE=1(kidney),1(large_intestine)	.
chr13	26788304	26788304	C	T	exonic	RNF6	ring finger protein 6	nonsynonymous SNV	p.R572Q	rs138379662	0	0	0	N	ID=COSM946359;OCCURENCE=1(lung),1(endometrium)	.
chr13	31216794	31216794	C	T	exonic	USPL1	ubiquitin specific peptidase like 1	nonsynonymous SNV	p.P338S	rs746978397	0	0	0	D	ID=COSM5037799;OCCURENCE=1(skin)	.
chr13	32376429	32376429	A	-	exonic	RXFP2	relaxin/insulin like family peptide receptor 2	frameshift deletion	p.S721fs	rs761227490	0	0	0		ID=COSM1366339;OCCURENCE=3(NS),1(peritoneum),7(large_intestine)	.	EUROPIUM-LABELLED INSL3; RELAXIN; RELAXIN-3; INSL3 B-CHAIN ANALOGUE; INSL3; A(9-26)INSL3; RELAXIN; INSL3 B CHAIN DIMER ANALOGUE 8; RELAXIN-1; A(4-24)(B7-24)H2; SERELAXIN; [125I]INSL3 (HUMAN); RELAXIN; A(Δ10/15C)INSL3; CYCLIC INSL3 B-CHAIN ANALOGUE 6; [33P]RELAXIN (HUMAN); A(C10/15S)INSL3; (DES 1-8) A-CHAIN INSL3 ANALOGUE; A(10-24)INSL3
chr13	32945129	32945129	C	T	exonic	BRCA2	BRCA2, DNA repair associated	nonsynonymous SNV	p.R2842C	rs80359104	1	0	0	D	ID=COSM946875,COSM23938;OCCURENCE=1(oesophagus),2(endometrium)	PARP Inhibitor	Cisplatin; RUCAPARIB; Niraparib; Etoposide; KU-0063794; PR-104; YU238259; BMN673; NU1025; Niraparib; AZD2461; Radiotherapy; Olaparib; Cyclophosphamide; VX-970; CEDIRANIB; Cisplatin; Evofosfamide; OLAPARIB; E7449; Everolimus; Olaparib; CX-3543; Chlorambucil; Paclitaxel; CISPLATIN; Talazoparib; OLAPARIB; CARBOPLATIN; CX-5461; E7449; BGB-290; ABT-767; Rucaparib; Veliparib; Carboplatin; Olaparib; Vin…	Ovarian Cancer,EL:1:Rucaparib, Niraparib(27908594, 27717299, 28229583) ; Ovarian Cancer,EL:2A:Olaparib(19553641, 20406929, 21862407, 25366685, 20609468)
chr13	36801470	36801470	C	A	exonic	CCDC169	coiled-coil domain containing 169	nonsynonymous SNV	p.E198D		0	0	0	N	ID=COSM947126;OCCURENCE=1(endometrium)	.
chr13	36903631	36903631	T	G	exonic	SPG20		nonsynonymous SNV	p.E344D		0	0	0	D	ID=COSM4752892;OCCURENCE=1(stomach)	.
chr13	38144738	38144738	G	A	exonic	POSTN	periostin	stopgain	p.R750X	rs760626575	0	0	0		ID=COSM5461715;OCCURENCE=1(large_intestine)	.	ANTISERUM
chr13	38320357	38320357	C	A	exonic	TRPC4	transient receptor potential cation channel subfamily C member 4	nonsynonymous SNV	p.S205I		0	0	0	D	ID=COSM4736473,COSM4736474;OCCURENCE=2(large_intestine)	.	(-)-ENGLERIN A; ML204; SKF96365; 2-APB; LA3+
chr13	39338470	39338470	C	T	exonic	FREM2	FRAS1 related extracellular matrix protein 2	nonsynonymous SNV	p.R1765C	rs770772406	0	0	0	N	ID=COSM232359;OCCURENCE=8(skin),1(prostate),1(upper_aerodigestive_tract)	.
chr13	43463359	43463359	G	A	exonic	EPSTI1	epithelial stromal interaction 1	nonsynonymous SNV	p.S323L	rs59267170	0	0	0		ID=COSM232261;OCCURENCE=1(skin)	.
chr13	46170726	46170726	A	G	exonic	ERICH6B	glutamate rich 6B	nonsynonymous SNV	p.Y139H	rs28548352	0	0	0	N	ID=COSM1741364;OCCURENCE=1(urinary_tract),1(thyroid),1(upper_aerodigestive_tract),26(large_intestine)	.
chr13	48955538	48955538	C	T	exonic	RB1	RB transcriptional corepressor 1	stopgain	p.R552X	rs121913303	1	0	0		ID=COSM1300225,COSM887;OCCURENCE=1(breast),1(bone),1(stomach),1(urinary_tract),2(liver),1(large_intestine),3(eye)	CDK inhibitors	Trilaciclib; PALBOCICLIB (PD0332991); Entinostat; Vorinostat; PF-06463922; Asparaginase; BAY 61-3606; Bortezomib; R547; JQ1; GDC-0941; Prednisolone; Fostamatinib; Methotrexate; Sapanisertib; Mercaptopurine; Sirolimus; PD-0332991; RETINOIC ACID; Nutlin-3a; Trichostatin A; Topotecan; Trametinib; Cisplatin; VCN-01; Ribociclib; Dexamethasone; Palbociclib; ALPELISIB (NVP-BYL719); Everolimus
chr13	49050906	49050906	G	T	exonic	RB1	RB transcriptional corepressor 1	stopgain	p.E864X		1	0	0		ID=COSM432458,COSM1133977;OCCURENCE=1(breast)	CDK inhibitors	Trilaciclib; PALBOCICLIB (PD0332991); Entinostat; Vorinostat; PF-06463922; Asparaginase; BAY 61-3606; Bortezomib; R547; JQ1; GDC-0941; Prednisolone; Fostamatinib; Methotrexate; Sapanisertib; Mercaptopurine; Sirolimus; PD-0332991; RETINOIC ACID; Nutlin-3a; Trichostatin A; Topotecan; Trametinib; Cisplatin; VCN-01; Ribociclib; Dexamethasone; Palbociclib; ALPELISIB (NVP-BYL719); Everolimus
chr13	53313209	53313209	C	T	exonic	CNMD	chondromodulin	nonsynonymous SNV	p.G57E		0	0	0	N	ID=COSM4530574;OCCURENCE=1(skin)	.
chr13	73491250	73491250	C	T	exonic	PIBF1	progesterone immunomodulatory binding factor 1	nonsynonymous SNV	p.S559F		0	0	0	N	ID=COSM1706838;OCCURENCE=3(skin)	.
chr13	73636507	73636507	C	G	exonic	KLF5	Kruppel like factor 5	stopgain	p.S257X		0	0	0		ID=COSM5435904;OCCURENCE=1(oesophagus)	.
chr13	77642939	77642939	G	A	exonic	MYCBP2	MYC binding protein 2, E3 ubiquitin protein ligase	nonsynonymous SNV	p.R3978C	rs771880861	0	0	0	D	ID=COSM276195,COSM276194;OCCURENCE=2(skin),1(large_intestine)	.
chr13	84454201	84454201	T	C	exonic	SLITRK1	SLIT and NTRK like family member 1	nonsynonymous SNV	p.N481S		0	0	0	D	ID=COSM1226680;OCCURENCE=1(large_intestine)	.
chr13	86369460	86369460	C	T	exonic	SLITRK6	SLIT and NTRK like family member 6	nonsynonymous SNV	p.G395E		0	0	0	N	ID=COSM3469917;OCCURENCE=1(skin)	.
chr13	93879821	93879821	G	A	exonic	GPC6	glypican 6	nonsynonymous SNV	p.G38S		0	0	0	N	ID=COSM4993931;OCCURENCE=1(haematopoietic_and_lymphoid_tissue)	.
chr13	99483686	99483686	C	T	exonic	DOCK9	dedicator of cytokinesis 9	unknown	p.T1495T	rs527921216	0	0	0		ID=COSM5052292,COSM5052295,COSM5052294,COSM5052293,COSM5052291;OCCURENCE=1(stomach)	.
chr13	113736750	113736750	G	A	exonic	MCF2L	MCF.2 cell line derived transforming sequence like	nonsynonymous SNV	p.A686T	rs760158165	0	0	0	D	ID=COSM4775298,COSM255621,COSM4775299,COSM4775296,COSM4775297;OCCURENCE=2(central_nervous_system)	.
chr13	114287499	114287499	G	A	exonic	TFDP1	transcription factor Dp-1	nonsynonymous SNV	p.E125K		0	0	0	D	ID=COSM5478452,COSM5478451;OCCURENCE=1(large_intestine)	.
chr13	115012445	115012445	G	A	exonic	CDC16	cell division cycle 16	nonsynonymous SNV	p.G313S	rs779267341	0	0	0	D	ID=COSM4046277;OCCURENCE=1(stomach)	.
chr13	115070268	115070268	G	A	exonic	UPF3A	UPF3A, regulator of nonsense mediated mRNA decay	nonsynonymous SNV	p.R436Q	rs773827734	0	0	0	N	ID=COSM2264740;OCCURENCE=1(large_intestine)	.
chr14	19553451	19553451	C	T	exonic	POTEG	POTE ankyrin domain family member G	nonsynonymous SNV	p.S12F	rs201677121	0	0	0	N	ID=COSM432765;OCCURENCE=1(haematopoietic_and_lymphoid_tissue),1(lung),1(endometrium)	.
chr14	20249038	20249038	G	A	exonic	OR4M1	olfactory receptor family 4 subfamily M member 1	nonsynonymous SNV	p.R186Q	rs751115160	0	0	0	N	ID=COSM6384117;OCCURENCE=1(thyroid)	.
chr14	20502223	20502223	C	T	exonic	OR4K13	olfactory receptor family 4 subfamily K member 13	nonsynonymous SNV	p.R232Q		0	0	0	N	ID=COSM6194794;OCCURENCE=1(breast)	.
chr14	20666276	20666276	G	A	exonic	OR11G2	olfactory receptor family 11 subfamily G member 2	nonsynonymous SNV	p.R261K	rs112959092	0	0	0	N	ID=COSM5382006;OCCURENCE=1(skin)	.
chr14	21860739	21860739	C	A	exonic	CHD8	chromodomain helicase DNA binding protein 8	nonsynonymous SNV	p.S2233I		0	0	0	N	ID=COSM3494912,COSM3494913;OCCURENCE=1(skin)	.
chr14	23523355	23523355	G	A	exonic	CDH24	cadherin 24	nonsynonymous SNV	p.R323C	rs754117962	0	0	0	N	ID=COSM4049959,COSM4049960;OCCURENCE=1(stomach)	.
chr14	23744823	23744823	A	T	exonic	HOMEZ	homeobox and leucine zipper encoding	nonsynonymous SNV	p.D540E	rs3208861	0	0	0	N	ID=COSM3749271,COSM3749272;OCCURENCE=1(salivary_gland),1(prostate),1(thyroid),9(large_intestine)	.
chr14	23745431	23745431	G	A	exonic	HOMEZ	homeobox and leucine zipper encoding	nonsynonymous SNV	p.R338W	rs200360372	0	0	0	N	ID=COSM4690936,COSM4690935;OCCURENCE=2(large_intestine)	.
chr14	23874936	23874936	G	A	exonic	MYH6	myosin heavy chain 6	nonsynonymous SNV	p.P82L	rs529427223	0	0	0	D	ID=COSM5581776;OCCURENCE=1(skin)	.	OMECAMTIV MECARBIL
chr14	24523942	24523942	G	A	exonic	CARMIL3	capping protein regulator and myosin 1 linker 3	nonsynonymous SNV	p.A129T	rs141263195	0	0	0	N	ID=COSM3987595;OCCURENCE=1(kidney)	.
chr14	24590594	24590594	C	T	exonic	DCAF11	DDB1 and CUL4 associated factor 11	nonsynonymous SNV	p.P423S		0	0	0	N	ID=COSM3495342;OCCURENCE=2(skin)	.
chr14	24798648	24798648	G	A	exonic	ADCY4	adenylate cyclase 4	nonsynonymous SNV	p.R437W	rs972915180	0	0	0	D	ID=COSM4463877;OCCURENCE=1(skin),1(cervix)	.
chr14	24845275	24845275	G	A	exonic	NFATC4	nuclear factor of activated T-cells 4	nonsynonymous SNV	p.R738H		0	0	0	D	ID=COSM955055,COSM4245052,COSM1152714,COSM4245053;OCCURENCE=2(large_intestine),1(endometrium)	.
chr14	33525145	33525145	G	A	exonic	NPAS3	neuronal PAS domain protein 3	nonsynonymous SNV	p.E36K		0	0	0	N	ID=COSM4560853,COSM4560854;OCCURENCE=1(skin)	.
chr14	44974141	44974141	A	G	exonic	FSCB	fibrous sheath CABYR binding protein	nonsynonymous SNV	p.S684P	rs8008805	0	0	0	N	ID=COSM239923;OCCURENCE=1(prostate)	.
chr14	51448794	51448794	G	A	exonic	TRIM9	tripartite motif containing 9	nonsynonymous SNV	p.S625L		0	0	0	D	ID=COSM3496295,COSM3496294;OCCURENCE=1(skin)	.
chr14	52433355	52433355	G	A	exonic	GNG2	G protein subunit gamma 2	nonsynonymous SNV	p.A95T		0	0	0	N	ID=COSM6480092;OCCURENCE=1(lung)	.
chr14	55226978	55226978	G	A	exonic	SAMD4A	sterile alpha motif domain containing 4A	nonsynonymous SNV	p.E426K	rs752916073	0	0	0	D	ID=COSM6771716;OCCURENCE=1(large_intestine)	.
chr14	55241684	55241684	C	T	exonic	SAMD4A	sterile alpha motif domain containing 4A	nonsynonymous SNV	p.T583M	rs948578399	0	0	0	D	ID=COSM4471910;OCCURENCE=1(skin)	.
chr14	55817461	55817461	A	-	exonic	FBXO34	F-box protein 34	frameshift deletion	p.I120fs		0	0	0		ID=COSM1370163;OCCURENCE=8(large_intestine),1(biliary_tract)	.
chr14	56079169	56079169	G	A	exonic	KTN1	kinectin 1	nonsynonymous SNV	p.A135T	rs776818967	0	0	0	D	ID=COSM191957;OCCURENCE=1(large_intestine)	.
chr14	57949811	57949811	C	T	exonic	C14orf105		nonsynonymous SNV	p.R122Q	rs562072722	0	0	0	N	ID=COSM5030338;OCCURENCE=1(bone)	.
chr14	59112128	59112128	G	A	exonic	DACT1	dishevelled binding antagonist of beta catenin 1	nonsynonymous SNV	p.G263R		0	0	0	D	ID=COSM5848239;OCCURENCE=1(NS)	.
chr14	59965548	59965548	C	T	exonic	JKAMP	JNK1/MAPK8 associated membrane protein	stopgain	p.R202X		0	0	0		ID=COSM6689549,COSM6689548;OCCURENCE=1(large_intestine)	.
chr14	60212801	60212801	C	T	exonic	RTN1	reticulon 1	nonsynonymous SNV	p.E214K	rs370975029	0	0	0	N	ID=COSM167294;OCCURENCE=1(large_intestine),1(endometrium)	.
chr14	63316371	63316371	C	A	exonic	KCNH5	potassium voltage-gated channel subfamily H member 5	nonsynonymous SNV	p.K523N		0	0	0	D	ID=COSM956847,COSM1587515;OCCURENCE=1(endometrium)	.	QUINIDINE; GUANIDINE HYDROCHLORIDE; DALFAMPRIDINE; NERISPIRDINE; TEDISAMIL; LY97241
chr14	63417018	63417018	C	T	exonic	KCNH5	potassium voltage-gated channel subfamily H member 5	nonsynonymous SNV	p.R401H		0	0	0	D	ID=COSM470099,COSM1135593;OCCURENCE=1(stomach),1(kidney),1(large_intestine)	.	QUINIDINE; GUANIDINE HYDROCHLORIDE; DALFAMPRIDINE; NERISPIRDINE; TEDISAMIL; LY97241
chr14	69341640	69341640	G	A	exonic	ACTN1	actinin alpha 1	nonsynonymous SNV	p.S910F	rs745859336	0	0	0	D	ID=COSM4341101,COSM2135325;OCCURENCE=1(skin)	.
chr14	69787567	69787567	G	A	exonic	GALNT16	polypeptide N-acetylgalactosaminyltransferase 16	nonsynonymous SNV	p.R106Q	rs770076776	0	0	0	N	ID=COSM5848415,COSM5848414;OCCURENCE=1(NS)	.
chr14	73729069	73729069	C	T	exonic	PAPLN	papilin, proteoglycan like sulfated glycoprotein	nonsynonymous SNV	p.R753W	rs148072678	0	0	0	D	ID=COSM1370938,COSM1370939;OCCURENCE=1(haematopoietic_and_lymphoid_tissue),1(large_intestine)	.
chr14	74205773	74205773	G	-	exonic	ELMSAN1	ELM2 and Myb/SANT domain containing 1	frameshift deletion	p.N314fs	rs762448666	0	0	0		ID=COSM1371004;OCCURENCE=1(breast),5(stomach),1(peritoneum),1(prostate),30(large_intestine)	.
chr14	74538608	74538608	G	A	exonic	ALDH6A1	aldehyde dehydrogenase 6 family member A1	stopgain	p.R140X		0	0	0		ID=COSM957729;OCCURENCE=1(large_intestine),1(endometrium)	.
chr14	74711917	74711917	G	A	exonic	VSX2	visual system homeobox 2	nonsynonymous SNV	p.E169K	rs573993188	0	0	0	N	ID=COSM77000;OCCURENCE=1(ovary)	.
chr14	74759919	74759919	C	A	exonic	ABCD4	ATP binding cassette subfamily D member 4	nonsynonymous SNV	p.R251L		0	0	0	D	ID=COSM238643;OCCURENCE=1(prostate)	.
chr14	74764658	74764658	C	T	exonic	ABCD4	ATP binding cassette subfamily D member 4	nonsynonymous SNV	p.V134M		0	0	0	D	ID=COSM6590602,COSM6590603;OCCURENCE=1(large_intestine)	.
chr14	76620833	76620833	C	T	exonic	GPATCH2L	G-patch domain containing 2 like	stopgain	p.R43X		0	0	0		ID=COSM4666828,COSM4666829,COSM4666827;OCCURENCE=2(large_intestine)	.
chr14	76949060	76949060	C	T	exonic	ESRRB	estrogen related receptor beta	stopgain	p.R249X		0	0	0		ID=COSM1371210,COSM1371209;OCCURENCE=1(large_intestine)	.	DAIDZEIN; DY131; BIOCHANIN A; GENISTEIN; DIETHYLSTILBESTROL
chr14	79181476	79181476	G	A	exonic	NRXN3	neurexin 3	nonsynonymous SNV	p.E678K		0	0	0	N	ID=COSM196753;OCCURENCE=1(prostate),2(large_intestine)	.
chr14	79423656	79423656	C	T	exonic	NRXN3	neurexin 3	nonsynonymous SNV	p.R772W	rs763997346	0	0	0	N	ID=COSM5346481;OCCURENCE=1(urinary_tract),1(large_intestine)	.
chr14	81610299	81610299	G	T	exonic	TSHR	thyroid stimulating hormone receptor	nonsynonymous SNV	p.D633Y		0	0	0	D	ID=COSM26419;OCCURENCE=12(thyroid)	.	THYROTROPIN ALFA; COMPOUND 8B [PMID: 22408719]; THYROTROPIN ALFA; GLUCOCORTICOID; TSH; THYROTROPIN; ANTISERUM; THYROTROPIN ALFA; THYROTROPIN ALFA; GM-CSF; [125I]TSH (HUMAN)
chr14	86088051	86088051	G	A	exonic	FLRT2	fibronectin leucine rich transmembrane protein 2	nonsynonymous SNV	p.V65I	rs200776611	0	0	0	N	ID=COSM1477809;OCCURENCE=1(breast)	.
chr14	88946331	88946331	C	T	exonic	PTPN21	protein tyrosine phosphatase, non-receptor type 21	nonsynonymous SNV	p.A482T		0	0	0	D	ID=COSM4758591;OCCURENCE=1(stomach),1(large_intestine)	.
chr14	90437595	90437595	G	A	exonic	TDP1	tyrosyl-DNA phosphodiesterase 1	nonsynonymous SNV	p.E246K	rs779526188	0	0	0	N	ID=COSM6277533;OCCURENCE=1(liver)	.
chr14	92343937	92343937	G	A	exonic	FBLN5	fibulin 5	nonsynonymous SNV	p.S401F		0	0	0	D	ID=COSM5848709;OCCURENCE=2(NS)	.
chr14	94088935	94088935	G	A	exonic	UNC79	unc-79 homolog, NALCN channel complex subunit	nonsynonymous SNV	p.V1808I	rs770289469	0	0	0	N	ID=COSM5651296,COSM5651297;OCCURENCE=1(haematopoietic_and_lymphoid_tissue),1(large_intestine)	.
chr14	94844884	94844884	C	T	exonic	SERPINA1	serpin family A member 1	nonsynonymous SNV	p.E387K	rs121912712	0	0	0	D	ID=COSM3499314;OCCURENCE=1(skin)	.	ALPHAGEN; ALPHA1-PROTEINASE INHIBITOR; ZEMAIRA
chr14	95560463	95560463	T	C	exonic	DICER1	dicer 1, ribonuclease III	nonsynonymous SNV	p.D1709G		0	0	0	D	ID=COSM3744760;OCCURENCE=2(ovary),3(thyroid)	.
chr14	95670169	95670169	G	A	exonic	CLMN	calmin	nonsynonymous SNV	p.S506F	rs755572569	0	0	0	D	ID=COSM3386764;OCCURENCE=1(pancreas)	.
chr14	96707293	96707293	G	A	exonic	BDKRB2	bradykinin receptor B2	nonsynonymous SNV	p.A210T	rs183204823	0	0	0	N	ID=COSM4053340;OCCURENCE=1(stomach)	.	ICATIBANT; ANATIBANT; ANATIBANT; ICATIBANT ACETATE; LABRADIMIL; ICATIBANT; ANATIBANT; LABRADIMIL; SALT; Fasitibant chloride; ICATIBANT
chr14	100758690	100758690	G	A	exonic	SLC25A29	solute carrier family 25 member 29	nonsynonymous SNV	p.A281V		0	0	0	N	ID=COSM6392539;OCCURENCE=1(thyroid)	.	PROPIONYL-L-CARNITINE
chr14	101348653	101348653	G	A	exonic	RTL1	retrotransposon Gag like 1	nonsynonymous SNV	p.R825C		0	0	0	N	ID=COSM1368254;OCCURENCE=1(large_intestine)	.
chr14	102028142	102028142	C	T	exonic	DIO3	iodothyronine deiodinase 3	unknown	p.S103S	rs762098588	0	0	0		ID=COSM6644038,COSM6644039;OCCURENCE=1(large_intestine)	.
chr14	102478779	102478779	A	G	exonic	DYNC1H1	dynein cytoplasmic 1 heavy chain 1	nonsynonymous SNV	p.N2329S	rs142335110	0	0	0	N	ID=COSM3386418;OCCURENCE=1(pancreas)	.
chr14	104219383	104219383	G	A	exonic	PPP1R13B	protein phosphatase 1 regulatory subunit 13B	nonsynonymous SNV	p.T261M	rs781067289	0	0	0	N	ID=COSM469695;OCCURENCE=1(kidney)	.
chr14	104431700	104431700	G	A	exonic	TDRD9	tudor domain containing 9	nonsynonymous SNV	p.V151M		0	0	0	N	ID=COSM4548620;OCCURENCE=1(skin)	.
chr14	105196381	105196381	C	T	exonic	ADSSL1	adenylosuccinate synthase like 1	nonsynonymous SNV	p.S51F		0	0	0	N	ID=COSM4468177;OCCURENCE=1(skin)	.
chr15	23685619	23685619	A	G	exonic	GOLGA6L2	golgin A6 family-like 2	nonsynonymous SNV	p.V668A	rs766054980	0	0	0		ID=COSM4148508,COSM4148509;OCCURENCE=2(thyroid),1(large_intestine)	.
chr15	24921658	24921658	A	C	exonic	NPAP1	nuclear pore associated protein 1	nonsynonymous SNV	p.K215T	rs1040939821	0	0	0	N	ID=COSM6728433;OCCURENCE=1(large_intestine)	.
chr15	27128585	27128585	C	A	exonic	GABRA5	gamma-aminobutyric acid type A receptor alpha5 subunit	nonsynonymous SNV	p.S126R		0	0	0	D	ID=COSM470465;OCCURENCE=1(kidney)	.	CHLORDIAZEPOXIDE; GANAXOLONE; BUTETHAL; PRIMIDONE; BUTABARBITAL; OCINAPLON; PHENOBARBITAL; [3H]L655708; METHOXYFLURANE; OXAZEPAM; BRETAZENIL; BUTALBITAL; PRAZEPAM; L655708; ALPRAZOLAM; ZK93423; EVT-201; GABOXADOL; CLOTIAZEPAM; CHLORDIAZEPOXIDE HYDROCHLORIDE; CINOLAZEPAM; ETHCHLORVYNOL; FLURAZEPAM HYDROCHLORIDE; TRIAZOLAM; TEMAZEPAM; TRIAZOLAM; FLUMAZENIL; ETOMIDATE; PENTOBARBITAL; ISONIPECOTIC AC…
chr15	28273201	28273201	G	A	exonic	OCA2	OCA2 melanosomal transmembrane protein	nonsynonymous SNV	p.R111W		0	0	0	N	ID=COSM3401660,COSM3401659;OCCURENCE=1(stomach),1(central_nervous_system),1(biliary_tract)	.
chr15	28422215	28422215	C	T	exonic	HERC2	HECT and RLD domain containing E3 ubiquitin protein ligase 2	nonsynonymous SNV	p.A3105T		0	0	0	D	ID=COSM6032813,COSM6032812;OCCURENCE=1(large_intestine)	.	NERATINIB
chr15	28441607	28441607	G	A	exonic	HERC2	HECT and RLD domain containing E3 ubiquitin protein ligase 2	nonsynonymous SNV	p.T2707M		0	0	0	D	ID=COSM4690082,COSM4690083;OCCURENCE=2(large_intestine)	.	NERATINIB
chr15	30012762	30012762	C	A	exonic	TJP1	tight junction protein 1	nonsynonymous SNV	p.D855Y		0	0	0	N	ID=COSM4883646;OCCURENCE=1(upper_aerodigestive_tract)	.	DEXAMETHASONE; GENISTEIN; ETHANOL
chr15	31339375	31339375	C	T	exonic	TRPM1	transient receptor potential cation channel subfamily M member 1	nonsynonymous SNV	p.R585H	rs147667317	0	0	0	D	ID=COSM1230516;OCCURENCE=1(skin),1(large_intestine)	.	ZN2+; PREGNENOLONE SULPHATE
chr15	31818561	31818561	G	A	exonic	OTUD7A	OTU deubiquitinase 7A	nonsynonymous SNV	p.T295M	rs767123271	0	0	0	N	ID=COSM1260731;OCCURENCE=1(stomach),1(oesophagus),2(upper_aerodigestive_tract)	.
chr15	34040423	34040423	G	A	exonic	RYR3	ryanodine receptor 3	nonsynonymous SNV	p.E2700K		0	0	0	N	ID=COSM2267590;OCCURENCE=1(skin)	.	DANTROLENE; DANTROLENE SODIUM; ATP; CAFFEINE; RYANODINE; MG2+; CA2+; RUTHENIUM RED
chr15	35044798	35044798	C	A	exonic	GJD2	gap junction protein delta 2	nonsynonymous SNV	p.A283S		0	0	0	D	ID=COSM6142304;OCCURENCE=1(lung)	.	CA2+; CARBENOXOLONE; OCTANOL; FLUFENAMIC ACID
chr15	38614451	38614451	G	T	exonic	SPRED1	sprouty related EVH1 domain containing 1	stopgain	p.E73X		0	0	0		ID=COSM3815923;OCCURENCE=1(breast)	.
chr15	42019515	42019515	C	T	exonic	MGA	MGA, MAX dimerization protein	stopgain	p.Q1190X		1	0	0		ID=COSM4981330;OCCURENCE=2(oesophagus)	.	MIGLITOL; ACARBOSE
chr15	42052632	42052632	C	T	exonic	MGA	MGA, MAX dimerization protein	nonsynonymous SNV	p.R2435W	rs779811318	1	0	0	D	ID=COSM187703;OCCURENCE=6(prostate),6(large_intestine),1(endometrium)	.	MIGLITOL; ACARBOSE
chr15	42147511	42147511	G	A	exonic	SPTBN5	spectrin beta, non-erythrocytic 5	stopgain	p.R3112X	rs369248083	0	0	0		ID=COSM4054630;OCCURENCE=1(stomach)	.
chr15	45003799	45003799	G	T	exonic	B2M	beta-2-microglobulin	stopgain	p.E19X		1	0	0		ID=COSM6142454,COSM6142453;OCCURENCE=1(lung)	.	AMIKACIN; PEMBROLIZUMAB; THYROGLOBULIN
chr15	45410045	45410045	G	A	exonic	DUOXA2	dual oxidase maturation factor 2	nonsynonymous SNV	p.G301S		0	0	0	N	ID=COSM700427;OCCURENCE=1(breast),1(lung)	.
chr15	45554221	45554221	G	A	exonic	SLC28A2	solute carrier family 28 member 2	nonsynonymous SNV	p.R60Q	rs115889945	0	0	0	N	ID=COSM5462465;OCCURENCE=1(large_intestine)	.	URIDINE; COMPOUND 48 [PMID: 25815140]; THYMIDINE
chr15	45654335	45654335	C	T	exonic	GATM	glycine amidinotransferase	nonsynonymous SNV	p.R415Q	rs374592247	0	0	0	N	ID=COSM244665;OCCURENCE=1(skin),1(prostate)	.
chr15	48062707	48062707	A	C	exonic	SEMA6D	semaphorin 6D	nonsynonymous SNV	p.E649D		0	0	0	N	ID=COSM1265228,COSM1265229;OCCURENCE=2(stomach)	.
chr15	48595048	48595048	G	A	exonic	SLC12A1	solute carrier family 12 member 1	nonsynonymous SNV	p.G1089E		0	0	0	D	ID=COSM1708128,COSM1708127;OCCURENCE=2(skin)	.	HYDROFLUMETHIAZIDE; ETHACRYNATE SODIUM; TORSEMIDE; BUMETANIDE; FUROSEMIDE; HYDROFLUMETHIAZIDE; FUROSEMIDE; PIRETANIDE; FUROSEMIDE; FUROSEMIDE; TRICHLORMETHIAZIDE; METOLAZONE; BUMETANIDE; CHLORMERODRIN; TORASEMIDE; CHLORTHALIDONE; BUMETANIDE; BENDROFLUMETHIAZIDE; METHYCLOTHIAZIDE; METHYCLOTHIAZIDE; BUMETANIDE; TRICHLORMETHIAZIDE; FUROSEMIDE; ETHACRYNIC ACID; CHLORMERODRIN; POTASSIUM CHLORIDE; TRIC…
chr15	52500758	52500758	C	T	exonic	MYO5C	myosin VC	nonsynonymous SNV	p.G1460E	rs751739750	0	0	0	D	ID=COSM5729711;OCCURENCE=1(skin)	.
chr15	52563983	52563983	G	A	exonic	MYO5C	myosin VC	nonsynonymous SNV	p.S270L	rs185635936	0	0	0	D	ID=COSM4055553;OCCURENCE=1(stomach)	.
chr15	52901069	52901069	T	-	exonic	FAM214A	family with sequence similarity 214 member A	frameshift deletion	p.N688fs	rs762546731	0	0	0		ID=COSM1373519;OCCURENCE=6(large_intestine)	.
chr15	54307601	54307601	G	A	exonic	UNC13C	unc-13 homolog C	nonsynonymous SNV	p.R834Q	rs201822096	0	0	0	N	ID=COSM298863,COSM298864;OCCURENCE=1(large_intestine)	.
chr15	54307906	54307906	G	T	exonic	UNC13C	unc-13 homolog C	stopgain	p.E936X		0	0	0		ID=COSM962956,COSM962955;OCCURENCE=1(endometrium)	.
chr15	63481869	63481869	G	A	exonic	RAB8B	RAB8B, member RAS oncogene family	nonsynonymous SNV	p.D16N		0	0	0	D	ID=COSM4428649;OCCURENCE=1(oesophagus)	.
chr15	64496768	64496768	G	A	exonic	CSNK1G1	casein kinase 1 gamma 1	stopgain	p.R291X		0	0	0		ID=COSM416867,COSM416868;OCCURENCE=1(urinary_tract),3(large_intestine)	.	COMPOUND 33 [PMID: 19364658]
chr15	65490491	65490491	T	A	exonic	CILP	cartilage intermediate layer protein	nonsynonymous SNV	p.E711D		0	0	0	D	ID=COSM434156;OCCURENCE=1(breast)	.
chr15	66729163	66729163	C	T	exonic	MAP2K1	mitogen-activated protein kinase kinase 1	nonsynonymous SNV	p.P124L	rs397516792	0	1	P124L	D	ID=COSM1315861;OCCURENCE=3(NS),5(skin),1(large_intestine)	Vemurafenib, MEK inhibitors	SELUMETINIB; WX-554; TRAMETINIB; BAY 869766; PIMASERTIB; COBIMETINIB; VEMURAFENIB; TRAMETINIB; TRAMETINIB; TRAMETINIB; PIMASERTIB; BALAMAPIMOD; CI-1040; Cobimetinib; GDC-0973; GSK2126458; CI-1040; AZD6244; TRAMETINIB DIMETHYL SULFOXIDE; CI-1040; BINIMETINIB; AZD8330; MEK162; Encorafenib; Cetuximab; PD 0325901; DABRAFENIB; MEK162; MSC1936369B; SCH772984; PD 0325901; TRAMETINIB; TAK-733; CI-1040; P…	Melanoma,EL:3A:Cobimetinib, Trametinib(25351745, 26324360, 26566875, 25370473) ; Low-Grade Serous Ovarian Cancer,EL:3A:Cobimetinib, Trametinib(25351745, 26324360, 26566875, 25370473) ; Non-Small Cell Lung Cancer,EL:3A:Cobimetinib, Trametinib(25351745, 26324360, 26566875, 25370473) ; Histiocytic Disorder,EL:3A:Cobimetinib, Trametinib(25351745, 26324360, 26566875, 25370473)
chr15	74637399	74637399	C	T	exonic	CYP11A1	cytochrome P450 family 11 subfamily A member 1	nonsynonymous SNV	p.R204H	rs781754675	0	0	0	N	ID=COSM195691;OCCURENCE=1(liver)	.	AMINOGLUTETHIMIDE; MITOTANE; AMINOGLUTETHIMIDE; MITOTANE
chr15	74887991	74887991	C	T	exonic	ARID3B	AT-rich interaction domain 3B	nonsynonymous SNV	p.T520M	rs772265663	0	0	0	N	ID=COSM1374543;OCCURENCE=1(NS),1(large_intestine)	.
chr15	75499119	75499119	G	C	exonic	C15orf39	chromosome 15 open reading frame 39	nonsynonymous SNV	p.E244Q	rs769306778	0	0	0	N	ID=COSM1323845;OCCURENCE=1(ovary)	.
chr15	79750690	79750690	G	A	exonic	KIAA1024	KIAA1024	nonsynonymous SNV	p.R734H	rs140205068	0	0	0	N	ID=COSM4057219;OCCURENCE=1(stomach),1(large_intestine)	.
chr15	82934807	82934807	C	T	exonic	GOLGA6L10	golgin A6 family-like 10	nonsynonymous SNV	p.R258H	rs199623952	0	0	0		ID=COSM2012300;OCCURENCE=1(haematopoietic_and_lymphoid_tissue),1(upper_aerodigestive_tract)	.
chr15	82934807	82934807	C	G	exonic	GOLGA6L10	golgin A6 family-like 10	nonsynonymous SNV	p.R258P	rs199623952	0	0	0		ID=COSM4128474;OCCURENCE=1(prostate),1(thyroid),7(upper_aerodigestive_tract)	.
chr15	82934849	82934849	C	T	exonic	GOLGA6L10	golgin A6 family-like 10	nonsynonymous SNV	p.R244H	rs202051302	0	0	0		ID=COSM1478396;OCCURENCE=1(pancreas)	.
chr15	83434039	83434039	G	A	exonic	FSD2	fibronectin type III and SPRY domain containing 2	nonsynonymous SNV	p.R567C	rs752837620	0	0	0	N	ID=COSM1374981;OCCURENCE=1(large_intestine)	.
chr15	84651067	84651067	C	T	exonic	ADAMTSL3	ADAMTS like 3	nonsynonymous SNV	p.P896L	rs768650484	0	0	0	D	ID=COSM4659730;OCCURENCE=1(large_intestine)	.
chr15	85326685	85326685	G	A	exonic	ZNF592	zinc finger protein 592	nonsynonymous SNV	p.R260Q	rs755046243	0	0	0	N	ID=COSM3377686;OCCURENCE=2(pancreas),1(skin),1(prostate),1(large_intestine)	.
chr15	85478327	85478327	G	A	exonic	SLC28A1	solute carrier family 28 member 1	nonsynonymous SNV	p.A429T	rs182952101	0	0	0	N	ID=COSM277317;OCCURENCE=1(large_intestine)	.	THYMIDINE; URIDINE; IL-6
chr15	86198870	86198870	G	A	exonic	AKAP13	A-kinase anchoring protein 13	nonsynonymous SNV	p.V1533M	rs147374322	0	0	0	N	ID=COSM966050;OCCURENCE=1(endometrium)	.
chr15	89382106	89382106	C	T	exonic	ACAN	aggrecan	nonsynonymous SNV	p.R95W	rs767131816	0	0	0	D	ID=COSM1181522,COSM1181523;OCCURENCE=2(large_intestine)	.
chr15	90276242	90276242	C	T	exonic	WDR93	WD repeat domain 93	nonsynonymous SNV	p.P446S		0	0	0	N	ID=COSM3505318;OCCURENCE=1(skin)	.
chr15	90631838	90631838	C	T	exonic	IDH2	isocitrate dehydrogenase (NADP(+)) 2, mitochondrial	nonsynonymous SNV	p.R172K	rs121913503	0	1	R172K	D	ID=COSM33733;OCCURENCE=1(breast),4(bone),213(haematopoietic_and_lymphoid_tissue),1(liver),1(prostate),70(central_nervous_system),15(biliary_tract)	IDH inhibitorss	ENASIDENIB (AG-221); AG-881; AGI-6780; Enasidenib; Enasidenib; Venetoclax; AG-221; ENASIDENIB; ENASIDENIB; Dasatinib; Saracatinib; Quizartinib; Venetoclax; OLAPARIB; Dasatinib
chr15	91304286	91304288	TGA	-	exonic	BLM	Bloom syndrome RecQ like helicase	nonframeshift deletion	p.D566del	rs768095141	1	0	0		ID=COSM5850070;OCCURENCE=2(NS)	.	HYDROXYUREA; TRICHOSTATIN A
chr15	91432628	91432628	G	A	exonic	FES	FES proto-oncogene, tyrosine kinase	nonsynonymous SNV	p.R254H	rs145351114	0	0	0	N	ID=COSM471251,COSM966582;OCCURENCE=1(kidney),2(endometrium)	.	COMPOUND 8E [PMID: 24432909]; LORLANTINIB; COMPOUND 25B [PMID: 22564207]
chr15	91524812	91524812	C	G	exonic	PRC1	protein regulator of cytokinesis 1	nonsynonymous SNV	p.E197Q		0	0	0	N	ID=COSM702099;OCCURENCE=1(lung)	.
chr15	92690271	92690271	C	T	exonic	SLCO3A1	solute carrier organic anion transporter family member 3A1	nonsynonymous SNV	p.P524S	rs777846917	0	0	0	N	ID=COSM966667;OCCURENCE=1(endometrium)	.
chr15	100636569	100636569	C	T	exonic	ADAMTS17	ADAM metallopeptidase with thrombospondin type 1 motif 17	nonsynonymous SNV	p.R710Q	rs375653443	0	0	0	N	ID=COSM403279;OCCURENCE=2(liver),1(lung)	.
chr15	101024801	101024801	G	A	exonic	CERS3	ceramide synthase 3	nonsynonymous SNV	p.R121W	rs185909467	0	0	0	D	ID=COSM2200287;OCCURENCE=1(large_intestine)	.
chr15	101929699	101929699	G	A	exonic	PCSK6	proprotein convertase subtilisin/kexin type 6	unknown	p.A426V	rs777936708	0	0	0	D	ID=COSM5549836,COSM5549834,COSM5549835,COSM5549833;OCCURENCE=1(prostate)	.	PEPTIDE 18 [PMID: 24350995]; FURIN INHIBITOR PEPTIDE; MULTI-LEU (ML)-PEPTIDE; PHENYLACETYL-ARG-VAL-ARG-4-AMIDINOBENZYLAMIDE
chr15	101933582	101933582	G	A	exonic	PCSK6	proprotein convertase subtilisin/kexin type 6	unknown	p.G347G	rs755571481	0	0	0		ID=COSM699597,COSM699598,COSM1147448,COSM699599;OCCURENCE=1(lung)	.	PEPTIDE 18 [PMID: 24350995]; FURIN INHIBITOR PEPTIDE; MULTI-LEU (ML)-PEPTIDE; PHENYLACETYL-ARG-VAL-ARG-4-AMIDINOBENZYLAMIDE
chr16	304474	304474	C	T	exonic	FAM234A	family with sequence similarity 234 member A	nonsynonymous SNV	p.S21L		0	0	0	N	ID=COSM3420936,COSM3420937,COSM177928;OCCURENCE=1(large_intestine)	.
chr16	1034901	1034901	G	A	exonic	SOX8	SRY-box 8	nonsynonymous SNV	p.D286N		0	0	0	D	ID=COSM6787584;OCCURENCE=1(large_intestine)	.
chr16	1706049	1706049	C	T	exonic	CRAMP1	cramped chromatin regulator homolog 1	nonsynonymous SNV	p.R431W	rs747072572	0	0	0	D	ID=COSM4058662,COSM4058661;OCCURENCE=1(stomach)	.
chr16	2087893	2087893	G	A	exonic	SLC9A3R2	SLC9A3 regulator 2	nonsynonymous SNV	p.E308K	rs371903014	0	0	0	N	ID=COSM5384427,COSM5384428;OCCURENCE=1(skin)	.
chr16	2230356	2230356	C	T	exonic	CASKIN1	CASK interacting protein 1	nonsynonymous SNV	p.A1005T	rs749819495	0	0	0	D	ID=COSM6620474;OCCURENCE=1(large_intestine)	.
chr16	2373659	2373659	G	A	exonic	ABCA3	ATP binding cassette subfamily A member 3	nonsynonymous SNV	p.R160W	rs778698150	0	0	0	D	ID=COSM238631;OCCURENCE=1(prostate)	.
chr16	2571051	2571051	G	A	exonic	AMDHD2	amidohydrolase domain containing 2	nonsynonymous SNV	p.R49Q	rs751519666	0	0	0	N	ID=COSM969171;OCCURENCE=1(endometrium)	.
chr16	2578698	2578698	C	T	exonic	AMDHD2	amidohydrolase domain containing 2	nonsynonymous SNV	p.R370W		0	0	0	D	ID=COSM6599094,COSM6599095;OCCURENCE=1(large_intestine)	.
chr16	2816324	2816324	G	A	exonic	SRRM2	serine/arginine repetitive matrix 2	nonsynonymous SNV	p.R1932H	rs757822781	0	0	0	N	ID=COSM258967;OCCURENCE=2(large_intestine)	.
chr16	2906837	2906837	G	A	exonic	PRSS22	protease, serine 22	nonsynonymous SNV	p.A32V		0	0	0	D	ID=COSM39686;OCCURENCE=1(central_nervous_system)	.
chr16	3119304	3119304	-	G	exonic	IL32	interleukin 32	frameshift insertion	p.D163fs	rs398100042	0	0	0		ID=COSM4421643;OCCURENCE=1(pleura),1(bone),3(NS),9(large_intestine)	.
chr16	3254622	3254622	G	A	exonic	OR1F1	olfactory receptor family 1 subfamily F member 1	nonsynonymous SNV	p.V126M	rs8045183	0	0	0	N	ID=COSM5521166;OCCURENCE=1(biliary_tract)	.
chr16	3306349	3306349	C	T	exonic	MEFV	MEFV, pyrin innate immunity regulator	nonsynonymous SNV	p.R80H	rs201075710	0	0	0	N	ID=COSM6042938,COSM6042937;OCCURENCE=1(large_intestine)	.
chr16	3708835	3708835	G	A	exonic	TRAP1	TNF receptor associated protein 1	nonsynonymous SNV	p.R658C	rs139636268	0	0	0	N	ID=COSM1377799;OCCURENCE=1(cervix),1(large_intestine)	.	LUMINESPIB
chr16	4650307	4650307	G	A	exonic	C16orf96	chromosome 16 open reading frame 96	nonsynonymous SNV	p.A1139T	rs576049742	0	0	0	N	ID=COSM3420992;OCCURENCE=1(large_intestine)	.
chr16	5053524	5053524	C	T	exonic	SEC14L5	SEC14 like lipid binding 5	nonsynonymous SNV	p.R418W	rs546103563	0	0	0	D	ID=COSM5588892;OCCURENCE=1(skin)	.
chr16	5083691	5083691	C	T	exonic	NAGPA	N-acetylglucosamine-1-phosphodiester alpha-N-acetylglucosaminidase	nonsynonymous SNV	p.R42H	rs767942322	0	0	0	N	ID=COSM5851021;OCCURENCE=1(NS)	.
chr16	7703904	7703904	C	A	exonic	RBFOX1	RNA binding fox-1 homolog 1	nonsynonymous SNV	p.T325N		0	0	0	N	ID=COSM6372908,COSM6372909,COSM6372910,COSM6372907;OCCURENCE=1(thyroid)	.
chr16	9927997	9927997	G	A	exonic	GRIN2A	glutamate ionotropic receptor NMDA type subunit 2A	nonsynonymous SNV	p.P581L		0	0	0	D	ID=COSM3513479;OCCURENCE=1(breast),1(skin)	.	NEBOGLAMINE; D-SERINE; L-ASPARTIC ACID; [3H]CGS19755; ACAMPROSATE CALCIUM; MEMANTINE HYDROCHLORIDE; [3H]CGP61594; NERAMEXANE MESYLATE; N1-DANSYL-SPERMINE; AMANTIDINE; DEXTROMETHORPHAN POLISTIREX; Indantadol; FELBAMATE; NRX-1074; AV-101; D-CCPENE; L689560; KETAMINE; D-ASPARTIC ACID; KETAMINE HYDROCHLORIDE; [3H]CPP; RALFINAMIDE; 5,7-DICHLOROKYNURENIC ACID; [3H]DIZOCILPINE; (RS)-(TETRAZOL-5-YL)GLYCI…
chr16	11001760	11001760	G	A	exonic	CIITA	class II major histocompatibility complex transactivator	nonsynonymous SNV	p.R804Q	rs543333483	0	0	0	N	ID=COSM2141970;OCCURENCE=1(large_intestine)	.
chr16	15134955	15134955	C	T	exonic	NTAN1	N-terminal asparagine amidase	nonsynonymous SNV	p.E171K	rs147340910	0	0	0	N	ID=COSM4128708;OCCURENCE=1(thyroid),1(large_intestine)	.
chr16	15711333	15711333	C	T	exonic	MARF1	meiosis regulator and mRNA stability factor 1	nonsynonymous SNV	p.R927H	rs772423068	0	0	0	D	ID=COSM2126883,COSM2126882;OCCURENCE=2(large_intestine)	.
chr16	20386185	20386185	G	A	exonic	PDILT	protein disulfide isomerase like, testis expressed	nonsynonymous SNV	p.R214C	rs144890989	0	0	0	N	ID=COSM294691;OCCURENCE=1(stomach),1(large_intestine)	.
chr16	20471558	20471558	C	T	exonic	ACSM2A	acyl-CoA synthetase medium chain family member 2A	nonsynonymous SNV	p.P41L	rs755771543	0	0	0	N	ID=COSM4578758;OCCURENCE=1(bone),1(stomach)	.
chr16	21261140	21261140	G	A	exonic	ANKS4B	ankyrin repeat and sterile alpha motif domain containing 4B	nonsynonymous SNV	p.V85I		0	0	0	N	ID=COSM5850428;OCCURENCE=1(NS)	.
chr16	22358774	22358774	C	T	exonic	CDR2	cerebellar degeneration related protein 2	nonsynonymous SNV	p.E293K		0	0	0	N	ID=COSM6440919;OCCURENCE=1(skin)	.
chr16	23504719	23504719	G	A	exonic	GGA2	golgi associated, gamma adaptin ear containing, ARF binding protein 2	nonsynonymous SNV	p.R105C	rs143003037	0	0	0	N	ID=COSM968784;OCCURENCE=3(skin),1(endometrium)	.
chr16	24580595	24580595	C	T	exonic	RBBP6	RB binding protein 6, ubiquitin ligase	nonsynonymous SNV	p.P862S		0	0	0	N	ID=COSM5850528;OCCURENCE=2(NS)	.
chr16	28507415	28507417	GGA	-	exonic	APOBR	apolipoprotein B receptor	nonframeshift deletion	p.E353del	rs776002918	0	0	0		ID=COSM4333481,COSM4333482;OCCURENCE=3(breast),1(biliary_tract)	.
chr16	28507445	28507445	G	C	exonic	APOBR	apolipoprotein B receptor	nonsynonymous SNV	p.E361D	rs867873773	0	0	0	N	ID=COSM969464,COSM4128891;OCCURENCE=1(salivary_gland),1(ovary),2(breast),1(NS),1(pancreas),1(parathyroid),1(prostate),3(lung),1(cervix),1(thyroid),9(upper_aerodigestive_tract),3(large_intestine),1(central_nervous_system),1(endometrium)	.
chr16	28914210	28914210	G	A	exonic	ATP2A1	ATPase sarcoplasmic/endoplasmic reticulum Ca2+ transporting 1	nonsynonymous SNV	p.E908K	rs776733152	0	0	0	D	ID=COSM1742829;OCCURENCE=1(biliary_tract)	.	TGN4
chr16	29756224	29756224	C	T	exonic	C16orf54	chromosome 16 open reading frame 54	nonsynonymous SNV	p.A17T	rs775186423	0	0	0	N	ID=COSM5515600;OCCURENCE=1(biliary_tract)	.
chr16	29791627	29791627	G	A	exonic	ZG16	zymogen granule protein 16	nonsynonymous SNV	p.V131I	rs1036928290	0	0	0	N	ID=COSM1588374,COSM1588373;OCCURENCE=1(haematopoietic_and_lymphoid_tissue),1(endometrium)	.
chr16	30094731	30094731	G	A	exonic	PPP4C	protein phosphatase 4 catalytic subunit	nonsynonymous SNV	p.R107H		0	0	0	D	ID=COSM6446107;OCCURENCE=1(upper_aerodigestive_tract)	.
chr16	30723697	30723697	G	C	exonic	SRCAP	Snf2 related CREBBP activator protein	nonsynonymous SNV	p.E644Q		0	0	0	D	ID=COSM139009;OCCURENCE=1(skin)	.
chr16	31408931	31408931	G	A	exonic	ITGAD	integrin subunit alpha D	nonsynonymous SNV	p.V86M	rs566170081	0	0	0	D	ID=COSM6688040;OCCURENCE=1(large_intestine)	.
chr16	31539797	31539797	G	A	exonic	AHSP	alpha hemoglobin stabilizing protein	nonsynonymous SNV	p.V32I	rs555330651	0	0	0	N	ID=COSM6597081;OCCURENCE=1(large_intestine)	.
chr16	48221332	48221332	G	A	exonic	ABCC11	ATP binding cassette subfamily C member 11	nonsynonymous SNV	p.R905C	rs773761656	0	0	0	D	ID=COSM2833013;OCCURENCE=1(large_intestine)	.
chr16	55519522	55519522	G	A	exonic	MMP2	matrix metallopeptidase 2	nonsynonymous SNV	p.R222H	rs368282133	0	0	0	N	ID=COSM6034367;OCCURENCE=1(large_intestine)	.	BEVACIZUMAB; SERMS; MARIMASTAT; PG-116800; TANOMASTAT; BMS-275291; SIMVASTATIN; CGS-27023A; METASTAT; POLYPHENOL; HEPARAN SULFATE; PRAVASTATIN; MARIMASTAT; ARP100; AE-941; G-CSF; VINBLASTINE; IL-2; MARIMASTAT; BATIMASTAT; STREPTOZOTOCIN; ILOMASTAT; SB-3CT; CHLORHEXIDINE; RAMIPRIL; IMMUNOSUPPRESSIVE; 4-HYDROPEROXYCYCLOPHOSPHAMIDE; CHONDROITIN; CSA; RO-26-2853; NEOVASTAT; BMS 275291; TST10088; RESV…
chr16	57171184	57171184	G	A	exonic	CPNE2	copine 2	nonsynonymous SNV	p.R431Q	rs778835319	0	0	0	N	ID=COSM6634638;OCCURENCE=1(large_intestine)	.
chr16	57794796	57794796	G	A	exonic	KIFC3	kinesin family member C3	nonsynonymous SNV	p.R714W	rs782750748	0	0	0	D	ID=COSM6695797,COSM6695796;OCCURENCE=1(large_intestine)	.
chr16	58072250	58072250	G	A	exonic	MMP15	matrix metallopeptidase 15	nonsynonymous SNV	p.R131H	rs753429517	0	0	0	D	ID=COSM5706160;OCCURENCE=1(haematopoietic_and_lymphoid_tissue)	.	SL422; ILOMASTAT
chr16	67221399	67221399	C	T	exonic	EXOC3L1	exocyst complex component 3 like 1	nonsynonymous SNV	p.E257K		0	0	0	N	ID=COSM4976046,COSM4976047;OCCURENCE=2(oesophagus)	.
chr16	67662408	67662408	C	T	exonic	CTCF	CCCTC-binding factor	nonsynonymous SNV	p.P552S		1	0	0	N	ID=COSM703850;OCCURENCE=1(skin),1(lung)	.
chr16	67763905	67763905	C	T	exonic	RANBP10	RAN binding protein 10	nonsynonymous SNV	p.E312K	rs958381248	0	0	0	D	ID=COSM5479173,COSM5479174;OCCURENCE=1(large_intestine)	.
chr16	69973781	69973781	G	A	exonic	WWP2	WW domain containing E3 ubiquitin protein ligase 2	nonsynonymous SNV	p.E851K	rs755052182	0	0	0	N	ID=COSM3272500;OCCURENCE=1(large_intestine)	.
chr16	70841817	70841817	C	T	exonic	HYDIN	HYDIN, axonemal central pair apparatus protein	nonsynonymous SNV	p.G5011E		0	0	0	N	ID=COSM5522866,COSM5522865;OCCURENCE=1(NS)	.
chr16	70866849	70866849	C	T	exonic	HYDIN	HYDIN, axonemal central pair apparatus protein	nonsynonymous SNV	p.E4601K		0	0	0	N	ID=COSM3511444,COSM3511443;OCCURENCE=1(skin)	.
chr16	70871601	70871601	T	C	exonic	HYDIN	HYDIN, axonemal central pair apparatus protein	nonsynonymous SNV	p.K4412E	rs1774480	0	0	0	N	ID=COSM6352779,COSM6352778;OCCURENCE=1(breast),2(thyroid)	.
chr16	71604605	71604605	G	A	exonic	TAT	tyrosine aminotransferase	stopgain	p.R297X	rs758491525	0	0	0		ID=COSM6354485;OCCURENCE=1(central_nervous_system)	.	TETRACYCLINE; PROGESTERONE; ALBUMIN; ANDROGENS; MITOMYCIN-C; PREDNISOLONE; ENZYME INHIBITOR; PHENOBARBITAL; VITAMIN A; GENISTEIN; METHOTREXATE; URIDINE; GLUCOCORTICOID; BENZNIDAZOLE; 17 BETA-ESTRADIOL
chr16	74725331	74725331	G	A	exonic	MLKL	mixed lineage kinase domain like pseudokinase	nonsynonymous SNV	p.P189L	rs768978509	0	0	0	D	ID=COSM1709391;OCCURENCE=1(skin)	.	MLKL COMPOUND 1
chr16	74729555	74729555	C	T	exonic	MLKL	mixed lineage kinase domain like pseudokinase	nonsynonymous SNV	p.R34H	rs747075913	0	0	0	D	ID=COSM4062780;OCCURENCE=1(stomach)	.	MLKL COMPOUND 1
chr16	76482814	76482814	G	A	exonic	CNTNAP4	contactin associated protein like 4	nonsynonymous SNV	p.R301Q		0	0	0	N	ID=COSM6440936,COSM6440935,COSM6440934;OCCURENCE=1(skin)	.
chr16	80718797	80718797	G	A	exonic	CDYL2	chromodomain Y like 2	nonsynonymous SNV	p.S85L	rs139107743	0	0	0	N	ID=COSM4772560;OCCURENCE=1(stomach)	.
chr16	81213358	81213358	C	T	exonic	PKD1L2	polycystin 1 like 2 (gene/pseudogene)	nonsynonymous SNV	p.G718R		0	0	0	N	ID=COSM5923168,COSM5923166,COSM5923167,COSM5923169;OCCURENCE=1(skin)	.
chr16	81962178	81962178	C	T	exonic	PLCG2	phospholipase C gamma 2	nonsynonymous SNV	p.P844S		0	0	0	N	ID=COSM3512780,COSM3512779;OCCURENCE=5(skin)	.	CCT129957; Ibrutinib; IBRUTINIB
chr16	82101843	82101843	G	A	exonic	HSD17B2	hydroxysteroid 17-beta dehydrogenase 2	nonsynonymous SNV	p.G112R	rs752344353	0	0	0	D	ID=COSM1380122;OCCURENCE=1(large_intestine)	.
chr16	85682289	85682289	-	C	exonic	GSE1	Gse1 coiled-coil protein	frameshift insertion	p.T16fs	rs764524595	0	0	0		ID=COSM1380255;OCCURENCE=1(haematopoietic_and_lymphoid_tissue),1(liver),1(thyroid),1(thymus),7(large_intestine)	.
chr16	88505687	88505687	G	A	exonic	ZNF469	zinc finger protein 469	nonsynonymous SNV	p.G3937R	rs886052421	0	0	0	N	ID=COSM4522650;OCCURENCE=1(skin)	.
chr16	88792765	88792765	G	A	exonic	PIEZO1	piezo type mechanosensitive ion channel component 1	nonsynonymous SNV	p.R1299C		0	0	0	D	ID=COSM1380446;OCCURENCE=1(large_intestine)	.
chr17	1943116	1943116	C	T	exonic	DPH1	diphthamide biosynthesis 1	nonsynonymous SNV	p.R255W	rs746958259	0	0	0	D	ID=COSM4579511;OCCURENCE=1(bone),1(lung)	.
chr17	3101038	3101038	G	A	exonic	OR1A2	olfactory receptor family 1 subfamily A member 2	nonsynonymous SNV	p.V76I	rs775857630	0	0	0	N	ID=COSM977639;OCCURENCE=1(soft_tissue),1(endometrium)	.
chr17	3628974	3628974	C	T	exonic	HASPIN	histone H3 associated protein kinase	nonsynonymous SNV	p.S582L		0	0	0	N	ID=COSM4471853,COSM4471854;OCCURENCE=1(skin)	.	SGI-1776
chr17	3721585	3721585	C	T	exonic	NCBP3	nuclear cap binding subunit 3	nonsynonymous SNV	p.E428K		0	0	0	D	ID=COSM978526,COSM1588804;OCCURENCE=1(stomach),1(endometrium)	.
chr17	4875738	4875738	G	-	exonic	CAMTA2	calmodulin binding transcription activator 2	frameshift deletion	p.P889fs	rs778381439	0	0	0		ID=COSM4669044,COSM1384488,COSM4611746;OCCURENCE=2(stomach),19(large_intestine)	.
chr17	5041493	5041493	G	A	exonic	USP6	ubiquitin specific peptidase 6	nonsynonymous SNV	p.D335N	rs145087393	0	0	0	N	ID=COSM4899064,COSM4899063;OCCURENCE=1(NS),2(skin)	.
chr17	6331739	6331739	C	T	exonic	AIPL1	aryl hydrocarbon receptor interacting protein like 1	nonsynonymous SNV	p.G122R		0	0	0	D	ID=COSM5002994;OCCURENCE=1(pancreas)	.
chr17	6683194	6683194	G	A	exonic	FBXO39	F-box protein 39	nonsynonymous SNV	p.E3K	rs368045455	0	0	0	N	ID=COSM3521262;OCCURENCE=1(stomach),1(skin)	.
chr17	7399374	7399374	C	T	exonic	POLR2A	RNA polymerase II subunit A	nonsynonymous SNV	p.R70C	rs1052109875	0	0	0	D	ID=COSM1563622;OCCURENCE=1(large_intestine)	.
chr17	7574018	7574018	G	A	exonic	TP53	tumor protein p53	nonsynonymous SNV	p.R337C	rs587782529	1	0	R337C	D	ID=COSM11071,COSM117591;OCCURENCE=1(salivary_gland),1(vulva),1(ovary),8(breast),1(NS),8(haematopoietic_and_lymphoid_tissue),6(stomach),4(kidney),3(pancreas),1(peritoneum),2(liver),2(oesophagus),1(adrenal_gland),1(skin),1(prostate),4(lung),1(upper_aerodigestive_tract),10(large_intestine),5(central_nervous_system),1(biliary_tract),1(endometrium)	Wee1 inhibitors, Chk1 inhibitors, kevetrin, APR-246, nutlins, gene therapy	CTX-1; Gemcitabine; GRANISETRON; epirubicin; TOPICAL CORTICOSTEROIDS; Trametinib; AD.P53-DC; Cisplatin; YONDELIS; Doxorubicin; MK-1775; Paclitaxel; ZINC CHLORIDE; PD-0325901; PK11007; Temozolomide; TC-A2317; NU6027; DAB; IGF-1R antibody; PT2399; Ifosfamide; SELUMETINIB (AZD6244); EGFR antibody; IL-12; METHIMAZOLE; Cytarabine; CURAXIN CBLC102; Pramlintide; CAPECITABINE; Docetaxel; PROPYLTHIOURACIL…
chr17	7577094	7577094	G	A	exonic	TP53	tumor protein p53	nonsynonymous SNV	p.R282W	rs28934574	1	0	R282W	D	ID=COSM10704,COSM1636702,COSM3378339,COSM99925;OCCURENCE=1(salivary_gland),6(vulva),20(ovary),3(bone),33(breast),2(NS),13(haematopoietic_and_lymphoid_tissue),47(stomach),1(soft_tissue),13(urinary_tract),2(kidney),34(pancreas),2(peritoneum),7(liver),76(oesophagus),16(skin),7(prostate),25(lung),2(thyroid),54(upper_aerodigestive_tract),1(thymus),197(large_intestine),41(central_nervous_system),3(smal…	Wee1 inhibitors, Chk1 inhibitors, kevetrin, APR-246, nutlins, gene therapy	CTX-1; Gemcitabine; GRANISETRON; epirubicin; TOPICAL CORTICOSTEROIDS; Trametinib; AD.P53-DC; Cisplatin; YONDELIS; Doxorubicin; MK-1775; Paclitaxel; ZINC CHLORIDE; PD-0325901; PK11007; Temozolomide; TC-A2317; NU6027; DAB; IGF-1R antibody; PT2399; Ifosfamide; SELUMETINIB (AZD6244); EGFR antibody; IL-12; METHIMAZOLE; Cytarabine; CURAXIN CBLC102; Pramlintide; CAPECITABINE; Docetaxel; PROPYLTHIOURACIL…
chr17	7577130	7577130	A	G	exonic	TP53	tumor protein p53	nonsynonymous SNV	p.F270L		1	0	F270L	D	ID=COSM4070035,COSM44262,COSM165083,COSM4070034;OCCURENCE=1(bone),2(breast),1(haematopoietic_and_lymphoid_tissue),7(stomach),1(oesophagus),1(upper_aerodigestive_tract),4(large_intestine),1(central_nervous_system),1(biliary_tract)	Wee1 inhibitors, Chk1 inhibitors, kevetrin, APR-246, nutlins, gene therapy	CTX-1; Gemcitabine; GRANISETRON; epirubicin; TOPICAL CORTICOSTEROIDS; Trametinib; AD.P53-DC; Cisplatin; YONDELIS; Doxorubicin; MK-1775; Paclitaxel; ZINC CHLORIDE; PD-0325901; PK11007; Temozolomide; TC-A2317; NU6027; DAB; IGF-1R antibody; PT2399; Ifosfamide; SELUMETINIB (AZD6244); EGFR antibody; IL-12; METHIMAZOLE; Cytarabine; CURAXIN CBLC102; Pramlintide; CAPECITABINE; Docetaxel; PROPYLTHIOURACIL…
chr17	7577137	7577137	C	-	exonic	TP53	tumor protein p53	frameshift deletion	p.N268fs		1	0	0		ID=COSM6583;OCCURENCE=1(salivary_gland),1(oesophagus)	Wee1 inhibitors, Chk1 inhibitors, kevetrin, APR-246, nutlins, gene therapy	CTX-1; Gemcitabine; GRANISETRON; epirubicin; TOPICAL CORTICOSTEROIDS; Trametinib; AD.P53-DC; Cisplatin; YONDELIS; Doxorubicin; MK-1775; Paclitaxel; ZINC CHLORIDE; PD-0325901; PK11007; Temozolomide; TC-A2317; NU6027; DAB; IGF-1R antibody; PT2399; Ifosfamide; SELUMETINIB (AZD6244); EGFR antibody; IL-12; METHIMAZOLE; Cytarabine; CURAXIN CBLC102; Pramlintide; CAPECITABINE; Docetaxel; PROPYLTHIOURACIL…
chr17	7577538	7577538	C	T	exonic	TP53	tumor protein p53	nonsynonymous SNV	p.R248Q	rs11540652	1	0	R248Q	D	ID=COSM99602,COSM99021,COSM99020,COSM3356964,COSM10662,COSM1640830;OCCURENCE=2(salivary_gland),1(pleura),11(vulva),44(ovary),7(bone),93(breast),5(NS),50(stomach),87(haematopoietic_and_lymphoid_tissue),1(soft_tissue),7(kidney),37(urinary_tract),22(pancreas),1(peritoneum),9(liver),1(genital_tract),54(oesophagus),2(adrenal_gland),1(pituitary),21(skin),27(prostate),35(lung),5(thyroid),4(cervix),48(up…	Wee1 inhibitors, Chk1 inhibitors, kevetrin, APR-246, nutlins, gene therapy	CTX-1; Gemcitabine; GRANISETRON; epirubicin; TOPICAL CORTICOSTEROIDS; Trametinib; AD.P53-DC; Cisplatin; YONDELIS; Doxorubicin; MK-1775; Paclitaxel; ZINC CHLORIDE; PD-0325901; PK11007; Temozolomide; TC-A2317; NU6027; DAB; IGF-1R antibody; PT2399; Ifosfamide; SELUMETINIB (AZD6244); EGFR antibody; IL-12; METHIMAZOLE; Cytarabine; CURAXIN CBLC102; Pramlintide; CAPECITABINE; Docetaxel; PROPYLTHIOURACIL…
chr17	7577539	7577539	G	A	exonic	TP53	tumor protein p53	nonsynonymous SNV	p.R248W	rs121912651	1	0	R248W	D	ID=COSM120006,COSM120005,COSM1640831,COSM10656,COSM3388183,COSM120007;OCCURENCE=1(pleura),4(vulva),36(ovary),2(bone),84(breast),1(penis),8(NS),44(haematopoietic_and_lymphoid_tissue),39(stomach),5(soft_tissue),11(kidney),22(urinary_tract),20(pancreas),5(liver),53(oesophagus),39(skin),7(prostate),25(lung),1(cervix),4(thyroid),35(upper_aerodigestive_tract),1(thymus),186(large_intestine),40(central_n…	Wee1 inhibitors, Chk1 inhibitors, kevetrin, APR-246, nutlins, gene therapy	CTX-1; Gemcitabine; GRANISETRON; epirubicin; TOPICAL CORTICOSTEROIDS; Trametinib; AD.P53-DC; Cisplatin; YONDELIS; Doxorubicin; MK-1775; Paclitaxel; ZINC CHLORIDE; PD-0325901; PK11007; Temozolomide; TC-A2317; NU6027; DAB; IGF-1R antibody; PT2399; Ifosfamide; SELUMETINIB (AZD6244); EGFR antibody; IL-12; METHIMAZOLE; Cytarabine; CURAXIN CBLC102; Pramlintide; CAPECITABINE; Docetaxel; PROPYLTHIOURACIL…
chr17	7577558	7577558	G	-	exonic	TP53	tumor protein p53	frameshift deletion	p.C242fs		1	0	0		ID=COSM2744618,COSM6530,COSM437499,COSM437500,COSM437498,COSM3718845;OCCURENCE=2(ovary),9(breast),2(soft_tissue),1(pancreas),2(upper_aerodigestive_tract),5(large_intestine),1(endometrium)	Wee1 inhibitors, Chk1 inhibitors, kevetrin, APR-246, nutlins, gene therapy	CTX-1; Gemcitabine; GRANISETRON; epirubicin; TOPICAL CORTICOSTEROIDS; Trametinib; AD.P53-DC; Cisplatin; YONDELIS; Doxorubicin; MK-1775; Paclitaxel; ZINC CHLORIDE; PD-0325901; PK11007; Temozolomide; TC-A2317; NU6027; DAB; IGF-1R antibody; PT2399; Ifosfamide; SELUMETINIB (AZD6244); EGFR antibody; IL-12; METHIMAZOLE; Cytarabine; CURAXIN CBLC102; Pramlintide; CAPECITABINE; Docetaxel; PROPYLTHIOURACIL…
chr17	7577594	7577595	AC	-	exonic	TP53	tumor protein p53	frameshift deletion	p.C229fs		1	0	0		ID=COSM111637,COSM111635,COSM4336254,COSM2744660,COSM44360,COSM111636;OCCURENCE=1(salivary_gland),3(ovary),5(breast),1(haematopoietic_and_lymphoid_tissue),1(oesophagus),4(large_intestine)	Wee1 inhibitors, Chk1 inhibitors, kevetrin, APR-246, nutlins, gene therapy	CTX-1; Gemcitabine; GRANISETRON; epirubicin; TOPICAL CORTICOSTEROIDS; Trametinib; AD.P53-DC; Cisplatin; YONDELIS; Doxorubicin; MK-1775; Paclitaxel; ZINC CHLORIDE; PD-0325901; PK11007; Temozolomide; TC-A2317; NU6027; DAB; IGF-1R antibody; PT2399; Ifosfamide; SELUMETINIB (AZD6244); EGFR antibody; IL-12; METHIMAZOLE; Cytarabine; CURAXIN CBLC102; Pramlintide; CAPECITABINE; Docetaxel; PROPYLTHIOURACIL…
chr17	7578190	7578190	T	C	exonic	TP53	tumor protein p53	nonsynonymous SNV	p.Y220C	rs121912666	1	0	Y220C	D	ID=COSM99720,COSM99718,COSM3355993,COSM99719,COSM10758,COSM1644277;OCCURENCE=2(salivary_gland),1(vulva),46(ovary),2(bone),43(breast),1(NS),15(stomach),33(haematopoietic_and_lymphoid_tissue),10(soft_tissue),1(kidney),16(urinary_tract),10(pancreas),1(peritoneum),12(liver),37(oesophagus),2(skin),10(prostate),32(lung),31(upper_aerodigestive_tract),25(large_intestine),24(central_nervous_system),3(smal…	Wee1 inhibitors, Chk1 inhibitors, kevetrin, APR-246, nutlins, gene therapy	CTX-1; Gemcitabine; GRANISETRON; epirubicin; TOPICAL CORTICOSTEROIDS; Trametinib; AD.P53-DC; Cisplatin; YONDELIS; Doxorubicin; MK-1775; Paclitaxel; ZINC CHLORIDE; PD-0325901; PK11007; Temozolomide; TC-A2317; NU6027; DAB; IGF-1R antibody; PT2399; Ifosfamide; SELUMETINIB (AZD6244); EGFR antibody; IL-12; METHIMAZOLE; Cytarabine; CURAXIN CBLC102; Pramlintide; CAPECITABINE; Docetaxel; PROPYLTHIOURACIL…
chr17	7578194	7578194	G	A	exonic	TP53	tumor protein p53	nonsynonymous SNV	p.P219S	rs879253894	1	0	0	D	ID=COSM44076;OCCURENCE=1(haematopoietic_and_lymphoid_tissue),1(soft_tissue),1(oesophagus),1(skin),1(upper_aerodigestive_tract)	Wee1 inhibitors, Chk1 inhibitors, kevetrin, APR-246, nutlins, gene therapy	CTX-1; Gemcitabine; GRANISETRON; epirubicin; TOPICAL CORTICOSTEROIDS; Trametinib; AD.P53-DC; Cisplatin; YONDELIS; Doxorubicin; MK-1775; Paclitaxel; ZINC CHLORIDE; PD-0325901; PK11007; Temozolomide; TC-A2317; NU6027; DAB; IGF-1R antibody; PT2399; Ifosfamide; SELUMETINIB (AZD6244); EGFR antibody; IL-12; METHIMAZOLE; Cytarabine; CURAXIN CBLC102; Pramlintide; CAPECITABINE; Docetaxel; PROPYLTHIOURACIL…
chr17	7578212	7578212	G	A	exonic	TP53	tumor protein p53	stopgain	p.R213X	rs397516436	1	0	0		ID=COSM99618,COSM10654,COSM99617,COSM3378350,COSM99615,COSM99616,COSM1638393;OCCURENCE=4(salivary_gland),1(pleura),10(ovary),2(bone),54(breast),7(NS),15(haematopoietic_and_lymphoid_tissue),28(stomach),3(soft_tissue),8(urinary_tract),4(kidney),15(pancreas),7(liver),45(oesophagus),38(skin),5(prostate),16(lung),1(thyroid),25(upper_aerodigestive_tract),92(large_intestine),15(central_nervous_system),1…	Wee1 inhibitors, Chk1 inhibitors, kevetrin, APR-246, nutlins, gene therapy	CTX-1; Gemcitabine; GRANISETRON; epirubicin; TOPICAL CORTICOSTEROIDS; Trametinib; AD.P53-DC; Cisplatin; YONDELIS; Doxorubicin; MK-1775; Paclitaxel; ZINC CHLORIDE; PD-0325901; PK11007; Temozolomide; TC-A2317; NU6027; DAB; IGF-1R antibody; PT2399; Ifosfamide; SELUMETINIB (AZD6244); EGFR antibody; IL-12; METHIMAZOLE; Cytarabine; CURAXIN CBLC102; Pramlintide; CAPECITABINE; Docetaxel; PROPYLTHIOURACIL…
chr17	7578213	7578214	AA	-	exonic	TP53	tumor protein p53	frameshift deletion	p.F212fs		1	0	0		ID=COSM292497,COSM292498,COSM1735835,COSM292496,COSM5010239,COSM292495,COSM44162;OCCURENCE=1(breast),1(oesophagus),3(large_intestine),1(central_nervous_system)	Wee1 inhibitors, Chk1 inhibitors, kevetrin, APR-246, nutlins, gene therapy	CTX-1; Gemcitabine; GRANISETRON; epirubicin; TOPICAL CORTICOSTEROIDS; Trametinib; AD.P53-DC; Cisplatin; YONDELIS; Doxorubicin; MK-1775; Paclitaxel; ZINC CHLORIDE; PD-0325901; PK11007; Temozolomide; TC-A2317; NU6027; DAB; IGF-1R antibody; PT2399; Ifosfamide; SELUMETINIB (AZD6244); EGFR antibody; IL-12; METHIMAZOLE; Cytarabine; CURAXIN CBLC102; Pramlintide; CAPECITABINE; Docetaxel; PROPYLTHIOURACIL…
chr17	7578265	7578265	A	T	exonic	TP53	tumor protein p53	nonsynonymous SNV	p.I195N	rs760043106	1	0	I195N	D	ID=COSM1738250,COSM1738251,COSM1738253,COSM1738252,COSM3403267,COSM44877,COSM1738254;OCCURENCE=13(ovary),2(breast),1(NS),1(stomach),2(haematopoietic_and_lymphoid_tissue),1(pancreas),1(liver),1(oesophagus),1(lung),2(large_intestine),2(central_nervous_system),1(biliary_tract)	Wee1 inhibitors, Chk1 inhibitors, kevetrin, APR-246, nutlins, gene therapy	CTX-1; Gemcitabine; GRANISETRON; epirubicin; TOPICAL CORTICOSTEROIDS; Trametinib; AD.P53-DC; Cisplatin; YONDELIS; Doxorubicin; MK-1775; Paclitaxel; ZINC CHLORIDE; PD-0325901; PK11007; Temozolomide; TC-A2317; NU6027; DAB; IGF-1R antibody; PT2399; Ifosfamide; SELUMETINIB (AZD6244); EGFR antibody; IL-12; METHIMAZOLE; Cytarabine; CURAXIN CBLC102; Pramlintide; CAPECITABINE; Docetaxel; PROPYLTHIOURACIL…
chr17	7578268	7578268	A	G	exonic	TP53	tumor protein p53	nonsynonymous SNV	p.L194P	rs1057519998	1	0	L194P	D	ID=COSM3675531,COSM3675532,COSM437525,COSM437528,COSM437527,COSM437526,COSM43827;OCCURENCE=2(breast),1(NS),2(stomach),1(soft_tissue),1(oesophagus),4(large_intestine)	Wee1 inhibitors, Chk1 inhibitors, kevetrin, APR-246, nutlins, gene therapy	CTX-1; Gemcitabine; GRANISETRON; epirubicin; TOPICAL CORTICOSTEROIDS; Trametinib; AD.P53-DC; Cisplatin; YONDELIS; Doxorubicin; MK-1775; Paclitaxel; ZINC CHLORIDE; PD-0325901; PK11007; Temozolomide; TC-A2317; NU6027; DAB; IGF-1R antibody; PT2399; Ifosfamide; SELUMETINIB (AZD6244); EGFR antibody; IL-12; METHIMAZOLE; Cytarabine; CURAXIN CBLC102; Pramlintide; CAPECITABINE; Docetaxel; PROPYLTHIOURACIL…
chr17	7578406	7578406	C	T	exonic	TP53	tumor protein p53	nonsynonymous SNV	p.R175H	rs28934578	1	0	R175H	D	ID=COSM10648,COSM3355994,COSM99022,COSM1640851,COSM99024,COSM99023,COSM99914;OCCURENCE=11(salivary_gland),2(pleura),9(vulva),73(ovary),5(bone),129(breast),1(penis),4(NS),88(stomach),57(haematopoietic_and_lymphoid_tissue),1(soft_tissue),18(kidney),30(urinary_tract),47(pancreas),1(peritoneum),11(liver),100(oesophagus),4(adrenal_gland),7(skin),8(prostate),23(lung),2(thyroid),4(cervix),79(upper_aerod…	Wee1 inhibitors, Chk1 inhibitors, kevetrin, APR-246, nutlins, gene therapy	CTX-1; Gemcitabine; GRANISETRON; epirubicin; TOPICAL CORTICOSTEROIDS; Trametinib; AD.P53-DC; Cisplatin; YONDELIS; Doxorubicin; MK-1775; Paclitaxel; ZINC CHLORIDE; PD-0325901; PK11007; Temozolomide; TC-A2317; NU6027; DAB; IGF-1R antibody; PT2399; Ifosfamide; SELUMETINIB (AZD6244); EGFR antibody; IL-12; METHIMAZOLE; Cytarabine; CURAXIN CBLC102; Pramlintide; CAPECITABINE; Docetaxel; PROPYLTHIOURACIL…
chr17	7578413	7578413	C	T	exonic	TP53	tumor protein p53	nonsynonymous SNV	p.V173M	rs876660754	1	0	V173M	D	ID=COSM3388205,COSM98966,COSM121041,COSM2744864,COSM11084,COSM98964,COSM98965;OCCURENCE=1(pleura),5(ovary),3(bone),7(breast),6(haematopoietic_and_lymphoid_tissue),6(stomach),2(soft_tissue),1(urinary_tract),3(kidney),3(pancreas),1(liver),9(oesophagus),1(skin),2(lung),7(upper_aerodigestive_tract),12(large_intestine),2(central_nervous_system)	Wee1 inhibitors, Chk1 inhibitors, kevetrin, APR-246, nutlins, gene therapy	CTX-1; Gemcitabine; GRANISETRON; epirubicin; TOPICAL CORTICOSTEROIDS; Trametinib; AD.P53-DC; Cisplatin; YONDELIS; Doxorubicin; MK-1775; Paclitaxel; ZINC CHLORIDE; PD-0325901; PK11007; Temozolomide; TC-A2317; NU6027; DAB; IGF-1R antibody; PT2399; Ifosfamide; SELUMETINIB (AZD6244); EGFR antibody; IL-12; METHIMAZOLE; Cytarabine; CURAXIN CBLC102; Pramlintide; CAPECITABINE; Docetaxel; PROPYLTHIOURACIL…
chr17	7578419	7578419	C	A	exonic	TP53	tumor protein p53	stopgain	p.E171X		1	0	0		ID=COSM10996,COSM2744871,COSM3421937,COSM357724,COSM357725,COSM357726,COSM357723;OCCURENCE=1(salivary_gland),3(breast),1(haematopoietic_and_lymphoid_tissue),1(urinary_tract),1(liver),5(oesophagus),4(lung),2(upper_aerodigestive_tract),4(large_intestine),1(endometrium)	Wee1 inhibitors, Chk1 inhibitors, kevetrin, APR-246, nutlins, gene therapy	CTX-1; Gemcitabine; GRANISETRON; epirubicin; TOPICAL CORTICOSTEROIDS; Trametinib; AD.P53-DC; Cisplatin; YONDELIS; Doxorubicin; MK-1775; Paclitaxel; ZINC CHLORIDE; PD-0325901; PK11007; Temozolomide; TC-A2317; NU6027; DAB; IGF-1R antibody; PT2399; Ifosfamide; SELUMETINIB (AZD6244); EGFR antibody; IL-12; METHIMAZOLE; Cytarabine; CURAXIN CBLC102; Pramlintide; CAPECITABINE; Docetaxel; PROPYLTHIOURACIL…
chr17	7578427	7578427	T	C	exonic	TP53	tumor protein p53	nonsynonymous SNV	p.H168R	rs867114783	1	0	H168R	D	ID=COSM43545,COSM3388211,COSM3388210,COSM3388209,COSM3388207,COSM3388208,COSM3388206;OCCURENCE=2(ovary),1(breast),2(stomach),2(haematopoietic_and_lymphoid_tissue),1(soft_tissue),1(pancreas),3(oesophagus),1(lung),3(large_intestine),1(central_nervous_system),1(endometrium)	Wee1 inhibitors, Chk1 inhibitors, kevetrin, APR-246, nutlins, gene therapy	CTX-1; Gemcitabine; GRANISETRON; epirubicin; TOPICAL CORTICOSTEROIDS; Trametinib; AD.P53-DC; Cisplatin; YONDELIS; Doxorubicin; MK-1775; Paclitaxel; ZINC CHLORIDE; PD-0325901; PK11007; Temozolomide; TC-A2317; NU6027; DAB; IGF-1R antibody; PT2399; Ifosfamide; SELUMETINIB (AZD6244); EGFR antibody; IL-12; METHIMAZOLE; Cytarabine; CURAXIN CBLC102; Pramlintide; CAPECITABINE; Docetaxel; PROPYLTHIOURACIL…
chr17	7578431	7578431	G	A	exonic	TP53	tumor protein p53	stopgain	p.Q167X		1	0	0		ID=COSM11333,COSM121084,COSM121082,COSM121081,COSM3937613,COSM2744872,COSM121083;OCCURENCE=2(breast),1(haematopoietic_and_lymphoid_tissue),1(stomach),1(soft_tissue),2(urinary_tract),2(liver),7(oesophagus),4(lung),1(cervix),2(upper_aerodigestive_tract),8(large_intestine),1(central_nervous_system)	Wee1 inhibitors, Chk1 inhibitors, kevetrin, APR-246, nutlins, gene therapy	CTX-1; Gemcitabine; GRANISETRON; epirubicin; TOPICAL CORTICOSTEROIDS; Trametinib; AD.P53-DC; Cisplatin; YONDELIS; Doxorubicin; MK-1775; Paclitaxel; ZINC CHLORIDE; PD-0325901; PK11007; Temozolomide; TC-A2317; NU6027; DAB; IGF-1R antibody; PT2399; Ifosfamide; SELUMETINIB (AZD6244); EGFR antibody; IL-12; METHIMAZOLE; Cytarabine; CURAXIN CBLC102; Pramlintide; CAPECITABINE; Docetaxel; PROPYLTHIOURACIL…
chr17	7578457	7578457	C	A	exonic	TP53	tumor protein p53	nonsynonymous SNV	p.R158L		1	0	R158L	D	ID=COSM99677,COSM99676,COSM99678,COSM99675,COSM10714,COSM1649374,COSM3958835;OCCURENCE=1(breast),3(haematopoietic_and_lymphoid_tissue),1(soft_tissue),3(urinary_tract),1(kidney),2(liver),11(oesophagus),50(lung),1(thyroid),4(upper_aerodigestive_tract),1(large_intestine),1(thymus),3(central_nervous_system)	Wee1 inhibitors, Chk1 inhibitors, kevetrin, APR-246, nutlins, gene therapy	CTX-1; Gemcitabine; GRANISETRON; epirubicin; TOPICAL CORTICOSTEROIDS; Trametinib; AD.P53-DC; Cisplatin; YONDELIS; Doxorubicin; MK-1775; Paclitaxel; ZINC CHLORIDE; PD-0325901; PK11007; Temozolomide; TC-A2317; NU6027; DAB; IGF-1R antibody; PT2399; Ifosfamide; SELUMETINIB (AZD6244); EGFR antibody; IL-12; METHIMAZOLE; Cytarabine; CURAXIN CBLC102; Pramlintide; CAPECITABINE; Docetaxel; PROPYLTHIOURACIL…
chr17	7578471	7578482	GGGCGGGGGTGT	-	exonic	TP53	tumor protein p53	nonframeshift deletion	p.T150_P153del	rs137852790	1	0	p.P153del		ID=COSM5010333,COSM5010331,COSM5010330,COSM5010329,COSM5010328,COSM43627,COSM5010332;OCCURENCE=1(upper_aerodigestive_tract),1(large_intestine)	Wee1 inhibitors, Chk1 inhibitors, kevetrin, APR-246, nutlins, gene therapy	CTX-1; Gemcitabine; GRANISETRON; epirubicin; TOPICAL CORTICOSTEROIDS; Trametinib; AD.P53-DC; Cisplatin; YONDELIS; Doxorubicin; MK-1775; Paclitaxel; ZINC CHLORIDE; PD-0325901; PK11007; Temozolomide; TC-A2317; NU6027; DAB; IGF-1R antibody; PT2399; Ifosfamide; SELUMETINIB (AZD6244); EGFR antibody; IL-12; METHIMAZOLE; Cytarabine; CURAXIN CBLC102; Pramlintide; CAPECITABINE; Docetaxel; PROPYLTHIOURACIL…
chr17	7578475	7578475	G	T	exonic	TP53	tumor protein p53	nonsynonymous SNV	p.P152Q		1	0	P152Q	D	ID=COSM3970374,COSM3970373,COSM3970376,COSM3970377,COSM3970375,COSM44613,COSM3970378;OCCURENCE=1(stomach),1(liver),2(oesophagus),1(large_intestine),1(central_nervous_system)	Wee1 inhibitors, Chk1 inhibitors, kevetrin, APR-246, nutlins, gene therapy	CTX-1; Gemcitabine; GRANISETRON; epirubicin; TOPICAL CORTICOSTEROIDS; Trametinib; AD.P53-DC; Cisplatin; YONDELIS; Doxorubicin; MK-1775; Paclitaxel; ZINC CHLORIDE; PD-0325901; PK11007; Temozolomide; TC-A2317; NU6027; DAB; IGF-1R antibody; PT2399; Ifosfamide; SELUMETINIB (AZD6244); EGFR antibody; IL-12; METHIMAZOLE; Cytarabine; CURAXIN CBLC102; Pramlintide; CAPECITABINE; Docetaxel; PROPYLTHIOURACIL…
chr17	7578478	7578478	G	T	exonic	TP53	tumor protein p53	nonsynonymous SNV	p.P151H	rs1057520000	1	0	P151H	D	ID=COSM3388218,COSM2744918,COSM259150,COSM259151,COSM259152,COSM11476,COSM259149;OCCURENCE=1(salivary_gland),3(ovary),5(breast),1(haematopoietic_and_lymphoid_tissue),1(stomach),1(soft_tissue),1(kidney),2(urinary_tract),1(pancreas),2(liver),4(oesophagus),2(skin),4(lung),3(upper_aerodigestive_tract),7(large_intestine)	Wee1 inhibitors, Chk1 inhibitors, kevetrin, APR-246, nutlins, gene therapy	CTX-1; Gemcitabine; GRANISETRON; epirubicin; TOPICAL CORTICOSTEROIDS; Trametinib; AD.P53-DC; Cisplatin; YONDELIS; Doxorubicin; MK-1775; Paclitaxel; ZINC CHLORIDE; PD-0325901; PK11007; Temozolomide; TC-A2317; NU6027; DAB; IGF-1R antibody; PT2399; Ifosfamide; SELUMETINIB (AZD6244); EGFR antibody; IL-12; METHIMAZOLE; Cytarabine; CURAXIN CBLC102; Pramlintide; CAPECITABINE; Docetaxel; PROPYLTHIOURACIL…
chr17	7578484	7578484	G	T	exonic	TP53	tumor protein p53	nonsynonymous SNV	p.S149Y		1	0	0	D	ID=COSM5347068;OCCURENCE=1(endometrium)	Wee1 inhibitors, Chk1 inhibitors, kevetrin, APR-246, nutlins, gene therapy	CTX-1; Gemcitabine; GRANISETRON; epirubicin; TOPICAL CORTICOSTEROIDS; Trametinib; AD.P53-DC; Cisplatin; YONDELIS; Doxorubicin; MK-1775; Paclitaxel; ZINC CHLORIDE; PD-0325901; PK11007; Temozolomide; TC-A2317; NU6027; DAB; IGF-1R antibody; PT2399; Ifosfamide; SELUMETINIB (AZD6244); EGFR antibody; IL-12; METHIMAZOLE; Cytarabine; CURAXIN CBLC102; Pramlintide; CAPECITABINE; Docetaxel; PROPYLTHIOURACIL…
chr17	7578525	7578525	G	C	exonic	TP53	tumor protein p53	nonsynonymous SNV	p.C135W	rs1057519976	1	0	C135W	D	ID=COSM437602,COSM437604,COSM1640866,COSM437601,COSM437603,COSM4815153,COSM44219;OCCURENCE=1(pleura),4(ovary),8(breast),2(stomach),3(haematopoietic_and_lymphoid_tissue),1(urinary_tract),1(pancreas),2(oesophagus),1(adrenal_gland),2(prostate),1(lung),2(upper_aerodigestive_tract),2(large_intestine),5(central_nervous_system)	Wee1 inhibitors, Chk1 inhibitors, kevetrin, APR-246, nutlins, gene therapy	CTX-1; Gemcitabine; GRANISETRON; epirubicin; TOPICAL CORTICOSTEROIDS; Trametinib; AD.P53-DC; Cisplatin; YONDELIS; Doxorubicin; MK-1775; Paclitaxel; ZINC CHLORIDE; PD-0325901; PK11007; Temozolomide; TC-A2317; NU6027; DAB; IGF-1R antibody; PT2399; Ifosfamide; SELUMETINIB (AZD6244); EGFR antibody; IL-12; METHIMAZOLE; Cytarabine; CURAXIN CBLC102; Pramlintide; CAPECITABINE; Docetaxel; PROPYLTHIOURACIL…
chr17	7578527	7578527	A	-	exonic	TP53	tumor protein p53	frameshift deletion	p.C135fs		1	0	0		ID=COSM1645208,COSM392225,COSM392226,COSM4336280,COSM392228,COSM392227,COSM13156;OCCURENCE=1(salivary_gland),1(breast),1(pancreas),1(liver),1(oesophagus),1(adrenal_gland),2(lung),2(large_intestine)	Wee1 inhibitors, Chk1 inhibitors, kevetrin, APR-246, nutlins, gene therapy	CTX-1; Gemcitabine; GRANISETRON; epirubicin; TOPICAL CORTICOSTEROIDS; Trametinib; AD.P53-DC; Cisplatin; YONDELIS; Doxorubicin; MK-1775; Paclitaxel; ZINC CHLORIDE; PD-0325901; PK11007; Temozolomide; TC-A2317; NU6027; DAB; IGF-1R antibody; PT2399; Ifosfamide; SELUMETINIB (AZD6244); EGFR antibody; IL-12; METHIMAZOLE; Cytarabine; CURAXIN CBLC102; Pramlintide; CAPECITABINE; Docetaxel; PROPYLTHIOURACIL…
chr17	7578534	7578534	C	A	exonic	TP53	tumor protein p53	nonsynonymous SNV	p.K132N	rs866775781	1	0	K132N	D	ID=COSM10991,COSM2157115,COSM213188,COSM213186,COSM3403291,COSM213187;OCCURENCE=6(ovary),6(breast),1(haematopoietic_and_lymphoid_tissue),1(urinary_tract),2(kidney),2(pancreas),3(liver),3(oesophagus),2(skin),8(lung),1(large_intestine),2(central_nervous_system),1(endometrium)	Wee1 inhibitors, Chk1 inhibitors, kevetrin, APR-246, nutlins, gene therapy	CTX-1; Gemcitabine; GRANISETRON; epirubicin; TOPICAL CORTICOSTEROIDS; Trametinib; AD.P53-DC; Cisplatin; YONDELIS; Doxorubicin; MK-1775; Paclitaxel; ZINC CHLORIDE; PD-0325901; PK11007; Temozolomide; TC-A2317; NU6027; DAB; IGF-1R antibody; PT2399; Ifosfamide; SELUMETINIB (AZD6244); EGFR antibody; IL-12; METHIMAZOLE; Cytarabine; CURAXIN CBLC102; Pramlintide; CAPECITABINE; Docetaxel; PROPYLTHIOURACIL…
chr17	8021174	8021174	G	T	exonic	ALOXE3	arachidonate lipoxygenase 3	nonsynonymous SNV	p.F201L		0	0	0	D	ID=COSM117632;OCCURENCE=1(ovary)	.
chr17	8141724	8141724	C	T	exonic	CTC1	CST telomere replication complex component 1	nonsynonymous SNV	p.V141I	rs532695142	0	0	0	N	ID=COSM708534;OCCURENCE=1(lung)	.
chr17	8283172	8283172	C	T	exonic	RPL26	ribosomal protein L26	nonsynonymous SNV	p.R84Q	rs779824127	0	0	0	D	ID=COSM5882967;OCCURENCE=1(NS),1(upper_aerodigestive_tract)	.
chr17	8661675	8661675	G	A	exonic	SPDYE4	speedy/RINGO cell cycle regulator family member E4	nonsynonymous SNV	p.P9L	rs571433068	0	0	0	D	ID=COSM4483417;OCCURENCE=1(skin)	.
chr17	9760838	9760838	A	T	exonic	GLP2R	glucagon like peptide 2 receptor	nonsynonymous SNV	p.N237I		0	0	0	D	ID=COSM5013099;OCCURENCE=1(kidney)	.	ZP1848; GLUCAGON-LIKE PEPTIDE 2; GLUCAGON-LIKE PEPTIDE 2-(3-33); TEDUGLUTIDE; TEDUGLUTIDE; ELSIGLUTIDE
chr17	10248894	10248894	C	T	exonic	MYH13	myosin heavy chain 13	nonsynonymous SNV	p.E435K	rs750870108	0	0	0	D	ID=COSM1216145,COSM1216146;OCCURENCE=1(large_intestine)	.
chr17	10309377	10309377	G	A	exonic	MYH8	myosin heavy chain 8	stopgain	p.Q805X	rs866672047	0	0	0		ID=COSM4480377;OCCURENCE=1(skin)	.
chr17	10314225	10314225	C	T	exonic	MYH8	myosin heavy chain 8	nonsynonymous SNV	p.E486K	rs372242377	0	0	0	D	ID=COSM3513686;OCCURENCE=3(skin)	.
chr17	10363351	10363351	C	T	exonic	MYH4	myosin heavy chain 4	nonsynonymous SNV	p.R445H	rs749619476	0	0	0	D	ID=COSM3513778;OCCURENCE=1(skin),1(large_intestine)	.
chr17	10427806	10427806	G	A	exonic	MYH2	myosin heavy chain 2	nonsynonymous SNV	p.R1718C		0	0	0	D	ID=COSM4704600;OCCURENCE=3(large_intestine)	.
chr17	10427854	10427854	C	T	exonic	MYH2	myosin heavy chain 2	nonsynonymous SNV	p.E1702K		0	0	0	D	ID=COSM3513908;OCCURENCE=1(skin)	.
chr17	10450801	10450801	C	T	exonic	MYH2	myosin heavy chain 2	stopgain	p.W113X		0	0	0		ID=COSM3513998;OCCURENCE=1(skin)	.
chr17	11597195	11597195	G	T	exonic	DNAH9	dynein axonemal heavy chain 9	nonsynonymous SNV	p.R1542M		0	0	0	D	ID=COSM6646995;OCCURENCE=1(large_intestine)	.
chr17	11660880	11660880	C	T	exonic	DNAH9	dynein axonemal heavy chain 9	nonsynonymous SNV	p.P2289L	rs773384248	0	0	0	D	ID=COSM4505174;OCCURENCE=1(breast),1(skin)	.
chr17	15217426	15217426	C	T	exonic	TEKT3	tektin 3	nonsynonymous SNV	p.G286R	rs35459214	0	0	0	N	ID=COSM3356888;OCCURENCE=1(haematopoietic_and_lymphoid_tissue),1(large_intestine)	.
chr17	15522759	15522759	A	T	exonic	CDRT1	CMT1A duplicated region transcript 1	nonsynonymous SNV	p.I23N	rs201445711	0	0	0	N	ID=COSM3818869,COSM3818868;OCCURENCE=2(breast),1(pancreas),1(liver),2(thyroid),5(large_intestine)	.
chr17	17698232	17698232	C	T	exonic	RAI1	retinoic acid induced 1	nonsynonymous SNV	p.A657V	rs928593627	0	0	0	N	ID=COSM4064338,COSM4064337;OCCURENCE=2(stomach),1(prostate),2(large_intestine)	.
chr17	27042239	27042239	G	A	exonic	RAB34	RAB34, member RAS oncogene family	nonsynonymous SNV	p.L220F		0	0	0	D	ID=COSM135747,COSM3770118;OCCURENCE=1(soft_tissue),1(skin)	.
chr17	27580769	27580769	G	A	exonic	CRYBA1	crystallin beta A1	nonsynonymous SNV	p.E157K	rs753905999	0	0	0	D	ID=COSM5732924;OCCURENCE=1(pancreas)	.
chr17	27614329	27614329	C	T	exonic	NUFIP2	NUFIP2, FMR1 interacting protein 2	nonsynonymous SNV	p.R228H		0	0	0	D	ID=COSM5882828;OCCURENCE=1(large_intestine)	.
chr17	29196362	29196362	G	A	exonic	ATAD5	ATPase family, AAA domain containing 5	nonsynonymous SNV	p.G1137E		0	0	0	D	ID=COSM4065291;OCCURENCE=1(stomach)	.
chr17	29576111	29576111	C	T	exonic	NF1	neurofibromin 1	stopgain	p.R1362X	rs137854560	1	0	0		ID=COSM24443,COSM977438;OCCURENCE=1(ovary),1(breast),3(haematopoietic_and_lymphoid_tissue),3(soft_tissue),6(skin),1(large_intestine),1(central_nervous_system),1(endometrium)	PI3K/AKT/MTOR inhibitors, RAF inhibitors, MEK inhibitors	MEK162; Selumetinib; PD-325901; SELUMETINIB; Everolimus; Vinblastine; RAPAMYCIN (SIROLIMUS); Trametinib; Dasatinib; Bevacizumab; Tamoxifen; Trametinib; Pazopanib; Imatinib; Cediranib; PLX3397; Tipifarnib; BINIMETINIB (MEK162); SELUMETINIB (AZD6244); Binimetinib; VEMURAFENIB; TRAMETINIB; Nilotinib; GDC-0973; Sirolimus; Vemurafenib; JQ1 COMPOUND; RAFAMETINIB; PIMASERTIB; Erlotinib; PD0325901; DABRA…	All Tumors,EL:4:LTT462, Binimetinib, BVD523, Trametinib(24576830, 26925841, 26936308, 23614898, 24535670)
chr17	29858682	29858682	C	T	exonic	RAB11FIP4	RAB11 family interacting protein 4	stopgain	p.Q616X		0	0	0		ID=COSM436341;OCCURENCE=1(breast)	.
chr17	33592319	33592319	C	-	exonic	SLFN5	schlafen family member 5	frameshift deletion	p.P698fs		0	0	0		ID=COSM1382451;OCCURENCE=1(large_intestine)	.
chr17	33749255	33749255	C	T	exonic	SLFN12	schlafen family member 12	nonsynonymous SNV	p.E265K	rs763051307	0	0	0	N	ID=COSM174675;OCCURENCE=1(skin)	.
chr17	33806619	33806619	-	A	exonic	SLFN12L	schlafen family member 12 like	stopgain	p.N204_R205delinsX	rs774797739	0	0	0		ID=COSM5103229,COSM270674,COSM270673;OCCURENCE=5(large_intestine),1(small_intestine)	.
chr17	35578754	35578754	G	A	exonic	ACACA	acetyl-CoA carboxylase alpha	stopgain	p.R1192X		0	0	0		ID=COSM978244,COSM978243;OCCURENCE=2(endometrium)	.	TOFA; COMPOUND 21 [PMID: 23981033]
chr17	35614625	35614625	G	A	exonic	ACACA	acetyl-CoA carboxylase alpha	nonsynonymous SNV	p.S609L		0	0	0	D	ID=COSM978270,COSM978271;OCCURENCE=1(NS),1(skin),1(endometrium)	.	TOFA; COMPOUND 21 [PMID: 23981033]
chr17	36453192	36453192	T	G	exonic	MRPL45	mitochondrial ribosomal protein L45	nonsynonymous SNV	p.F15V	rs9890011	0	0	0	N	ID=COSM3742204;OCCURENCE=2(breast),1(kidney),1(liver),1(thyroid)	.
chr17	36484647	36484647	C	G	exonic	GPR179	G protein-coupled receptor 179	nonsynonymous SNV	p.R1602T		0	0	0	N	ID=COSM3795540;OCCURENCE=1(urinary_tract)	.
chr17	36485293	36485293	C	T	exonic	GPR179	G protein-coupled receptor 179	nonsynonymous SNV	p.E1387K		0	0	0	N	ID=COSM4768321;OCCURENCE=1(biliary_tract)	.
chr17	36619140	36619140	G	A	exonic	ARHGAP23	Rho GTPase activating protein 23	nonsynonymous SNV	p.V103M		0	0	0	N	ID=COSM6040643;OCCURENCE=1(large_intestine)	.
chr17	36628191	36628191	G	A	exonic	ARHGAP23	Rho GTPase activating protein 23	nonsynonymous SNV	p.D688N	rs199655106	0	0	0	N	ID=COSM399742;OCCURENCE=2(haematopoietic_and_lymphoid_tissue),1(lung),1(thyroid)	.
chr17	37879592	37879592	C	T	exonic	ERBB2	erb-b2 receptor tyrosine kinase 2	nonsynonymous SNV	p.S656F		0	1	0	D	ID=COSM1756937;OCCURENCE=2(urinary_tract)	Trastuzumab, Lapatinib, TDM1, Pertuzumab	EMODIN; ERTUMAXOMAB; Lapatinib; OSIMERTINIB MESYLATE; AC-480; AC480; PERTUZUMAB; GEMCITABINE; Neratinib; SAPITINIB; Seribantumab; BEVACIZUMAB+TRASTUZUMAB; trastuzumab emtansine; BMS-690514; Hemay-022; TESEVATINIB; AEE788; MUBRITINIB; DEPSIPEPTIDE; TRASTUZUMAB; WZ4002; GREEN TEA POLYPHENOLS; Afatinib; LHRH; Everolimus; Selumetinib; CANERTINIB; FF-284; AV-412; AZD8931; AZD8931; POZIOTINIB; ARRY-334…	Non-Small Cell Lung Cancer,EL:3A:Neratinib(23220880) ; Breast Cancer,EL:3A:Neratinib(23220880)
chr17	37922313	37922313	C	A	exonic	IKZF3	IKAROS family zinc finger 3	nonsynonymous SNV	p.E420D		0	0	0	N	ID=COSM705313;OCCURENCE=1(lung)	.
chr17	38186093	38186093	C	T	exonic	MED24	mediator complex subunit 24	nonsynonymous SNV	p.A417T	rs771715179	0	0	0	N	ID=COSM1243399;OCCURENCE=1(oesophagus)	.
chr17	38189328	38189328	G	A	exonic	MED24	mediator complex subunit 24	nonsynonymous SNV	p.T293M	rs772469065	0	0	0	N	ID=COSM5569693,COSM5569694;OCCURENCE=1(prostate)	.
chr17	38345179	38345179	C	T	exonic	RAPGEFL1	Rap guanine nucleotide exchange factor like 1	nonsynonymous SNV	p.R148W	rs375362393	0	0	0	N	ID=COSM2838784;OCCURENCE=2(large_intestine)	.
chr17	38926124	38926124	G	A	exonic	KRT26	keratin 26	nonsynonymous SNV	p.T284M	rs188607342	0	0	0	D	ID=COSM978944;OCCURENCE=1(urinary_tract),1(prostate),1(large_intestine),1(endometrium)	.
chr17	38955859	38955859	C	T	exonic	KRT28	keratin 28	nonsynonymous SNV	p.R96H	rs769431930	0	0	0	D	ID=COSM3970033;OCCURENCE=1(central_nervous_system)	.
chr17	39120762	39120762	C	T	exonic	KRT39	keratin 39	nonsynonymous SNV	p.E163K	rs769244028	0	0	0	D	ID=COSM1302786;OCCURENCE=1(urinary_tract),1(skin)	.
chr17	39190953	39190953	G	C	exonic	KRTAP1-3	keratin associated protein 1-3	nonsynonymous SNV	p.Q41E	rs78298475	0	0	0	N	ID=COSM1610209;OCCURENCE=1(kidney),4(liver),3(prostate),3(thyroid),7(upper_aerodigestive_tract),1(large_intestine),1(central_nervous_system)	.
chr17	39240819	39240819	C	G	exonic	KRTAP4-7	keratin associated protein 4-7	nonsynonymous SNV	p.L121V	rs374377149	0	0	0	N	ID=COSM1256181;OCCURENCE=1(stomach),2(haematopoietic_and_lymphoid_tissue),1(urinary_tract),1(prostate),2(large_intestine),1(central_nervous_system)	.
chr17	39274291	39274291	T	C	exonic	KRTAP4-11	keratin associated protein 4-11	nonsynonymous SNV	p.M93V	rs200214744	0	0	0	N	ID=COSM472756;OCCURENCE=2(breast),1(urinary_tract),3(kidney),2(liver),5(skin),4(prostate),4(lung),2(thyroid),16(upper_aerodigestive_tract),4(large_intestine),5(central_nervous_system),3(endometrium)	.
chr17	39296555	39296555	C	T	exonic	KRTAP4-6	keratin associated protein 4-6	nonsynonymous SNV	p.R62H	rs763253803	0	0	0	N	ID=COSM417538;OCCURENCE=2(breast),1(urinary_tract),1(upper_aerodigestive_tract),2(large_intestine)	.
chr17	39346593	39346595	CCT	-	exonic	KRTAP9-1	keratin associated protein 9-1	nonframeshift deletion	p.T152_C153delinsS	rs377187211	0	0	0		ID=COSM1134046,COSM436567;OCCURENCE=2(breast),2(skin),6(thyroid),1(upper_aerodigestive_tract)	.
chr17	39383027	39383027	G	T	exonic	KRTAP9-2	keratin associated protein 9-2	nonsynonymous SNV	p.A41S	rs71371478	0	0	0	N	ID=COSM221831;OCCURENCE=2(haematopoietic_and_lymphoid_tissue),1(kidney),1(pancreas),1(skin),1(prostate),1(thyroid),1(large_intestine)	.
chr17	39394482	39394482	T	C	exonic	KRTAP9-8	keratin associated protein 9-8	nonsynonymous SNV	p.I60T	rs201454642	0	0	0	N	ID=COSM1521033;OCCURENCE=1(NS),1(soft_tissue),1(kidney),1(lung)	.
chr17	39471763	39471763	C	T	exonic	KRTAP17-1	keratin associated protein 17-1	nonsynonymous SNV	p.G47D	rs74252500	0	0	0	N	ID=COSM3755516;OCCURENCE=1(skin),2(thyroid),6(large_intestine)	.
chr17	39661582	39661582	C	T	exonic	KRT13	keratin 13	nonsynonymous SNV	p.G74E		0	0	0	D	ID=COSM3517433;OCCURENCE=1(skin)	.
chr17	39881320	39881320	C	T	exonic	HAP1	huntingtin associated protein 1	nonsynonymous SNV	p.R550Q	rs149550090	0	0	0	N	ID=COSM4874841,COSM979282;OCCURENCE=1(endometrium)	.
chr17	40146893	40146893	G	A	exonic	DNAJC7	DnaJ heat shock protein family (Hsp40) member C7	nonsynonymous SNV	p.R159W		0	0	0	D	ID=COSM4444583,COSM4444582;OCCURENCE=1(skin),1(large_intestine)	.
chr17	41052970	41052970	C	T	exonic	G6PC	glucose-6-phosphatase catalytic subunit	nonsynonymous SNV	p.S26F		0	0	0	D	ID=COSM5591061;OCCURENCE=1(skin)	.
chr17	42170497	42170497	C	T	exonic	HDAC5	histone deacetylase 5	nonsynonymous SNV	p.G203S	rs778483531	0	0	0	N	ID=COSM979875;OCCURENCE=1(endometrium)	.	GIVINOSTAT; RESMINOSTAT; SB939; GIVINOSTAT; CUDC-101; PANOBINOSTAT LACTATE; CUDC-101; PANOBINOSTAT; BELINOSTAT; PIVANEX; PRACINOSTAT; CHR-3996; TRICHOSTATIN A; ENTINOSTAT; VALPROIC ACID; CUDC-907; CUDC-101; CUDC-101; ROMIDEPSIN; VORINOSTAT; MGCD-0103; BELINOSTAT; AR-42; VORINOSTAT; TACEDINALINE; BELINOSTAT; DACINOSTAT; ROMIDEPSIN; QUISINOSTAT; SCRIPTAID; GIVINOSTAT; PCI-24781; PANOBINOSTAT; SODIU…
chr17	42392313	42392313	G	A	exonic	RUNDC3A	RUN domain containing 3A	nonsynonymous SNV	p.E189K		0	0	0	N	ID=COSM5902003,COSM5902002;OCCURENCE=1(skin)	.
chr17	42756369	42756369	C	T	exonic	CCDC43	coiled-coil domain containing 43	nonsynonymous SNV	p.R180Q	rs754010368	0	0	0	D	ID=COSM3421613,COSM3421612;OCCURENCE=1(large_intestine)	.
chr17	44049275	44049275	G	A	exonic	MAPT	microtubule associated protein tau	nonsynonymous SNV	p.E62K		0	0	0	N	ID=COSM124329;OCCURENCE=1(upper_aerodigestive_tract)	.	EXEBRYL-1
chr17	46622001	46622001	-	G	exonic	HOXB2	homeobox B2	frameshift insertion	p.P91fs	rs761024113	0	0	0		ID=COSM290480;OCCURENCE=6(large_intestine)	.
chr17	46998607	46998607	G	A	exonic	UBE2Z	ubiquitin conjugating enzyme E2 Z	nonsynonymous SNV	p.G259E		0	0	0	N	ID=COSM3958499,COSM3958498;OCCURENCE=1(lung)	.
chr17	47587845	47587845	G	A	exonic	NGFR	nerve growth factor receptor	nonsynonymous SNV	p.E214K	rs550293667	0	0	0	N	ID=COSM3518925;OCCURENCE=1(skin)	.	BDNF; SAR164877; CXB909; NGF; PYM50028; NEUROTROPHIN-3; NEUROTROPHIN-4; PF-4383119
chr17	48267373	48267373	G	A	exonic	COL1A1	collagen type I alpha 1 chain	nonsynonymous SNV	p.P850S		0	0	0	D	ID=COSM4968473;OCCURENCE=1(adrenal_gland)	.	COLLAGENASE CLOSTRIDIUM HISTOLYTICUM; OCRIPLASMIN; COLLAGENASE CLOSTRIDIUM HISTOLYTICUM; COLLAGENASE CLOSTRIDIUM HISTOLYTICUM; COLLAGENASE
chr17	48275131	48275131	G	A	exonic	COL1A1	collagen type I alpha 1 chain	stopgain	p.R220X	rs72667036	0	0	0		ID=COSM42802;OCCURENCE=3(central_nervous_system)	.	COLLAGENASE CLOSTRIDIUM HISTOLYTICUM; OCRIPLASMIN; COLLAGENASE CLOSTRIDIUM HISTOLYTICUM; COLLAGENASE CLOSTRIDIUM HISTOLYTICUM; COLLAGENASE
chr17	48542777	48542777	C	T	exonic	CHAD	chondroadherin	nonsynonymous SNV	p.R321H	rs34405131	0	0	0	D	ID=COSM260086;OCCURENCE=1(large_intestine)	.
chr17	49825079	49825079	G	A	exonic	CA10	carbonic anhydrase 10	nonsynonymous SNV	p.R133W	rs368005486	0	0	0	D	ID=COSM4420020,COSM4420021;OCCURENCE=1(haematopoietic_and_lymphoid_tissue)	.
chr17	50149700	50149700	C	T	exonic	CA10	carbonic anhydrase 10	nonsynonymous SNV	p.V45I		0	0	0	N	ID=COSM6885369,COSM6885370;OCCURENCE=1(skin)	.
chr17	51900888	51900888	G	A	exonic	KIF2B	kinesin family member 2B	nonsynonymous SNV	p.R165Q	rs138252912	0	0	0	N	ID=COSM1600040;OCCURENCE=1(stomach),1(large_intestine),1(central_nervous_system)	.
chr17	56274355	56274355	G	A	exonic	EPX	eosinophil peroxidase	nonsynonymous SNV	p.R286H	rs121434566	0	0	0	D	ID=COSM6655631;OCCURENCE=1(large_intestine)	.
chr17	56349125	56349125	C	T	exonic	MPO	myeloperoxidase	nonsynonymous SNV	p.D673N	rs763078734	0	0	0	D	ID=COSM4866480,COSM981779;OCCURENCE=2(endometrium)	.	D-ALPHA-TOCOPHEROL ACETATE; NIMESULIDE; DIMETHYL SULFOXIDE; XANTHINE OXIDASE INHIBITOR; DMSO; FLUDARABINE; METHYLENE BLUE; THEOPHYLLINE; GRANULOCYTE COLONY-STIMULATING FACTOR; RHIL-11; FENTANYL; DICLOFENAC; AZD5904; CI-921; AZD3241; TENECTEPLASE; FLUTAMIDE; PSORALEN; DOXYCYCLINE; OCTREOTIDE; PYRAZINAMIDE; LITHIUM; TRIMETHOPRIM; SULFONES; ANTICOAGULANT; IMMUNOMODULATING AGENT; LIDOCAINE; LORATADIN…
chr17	56435827	56435827	C	T	exonic	RNF43	ring finger protein 43	nonsynonymous SNV	p.R437Q	rs140873038	1	0	0	N	ID=COSM1384752;OCCURENCE=1(large_intestine)	Porcupine inhibitors
chr17	56492739	56492739	C	T	exonic	RNF43	ring finger protein 43	nonsynonymous SNV	p.G67D		1	0	0	N	ID=COSM6053596;OCCURENCE=2(large_intestine)	Porcupine inhibitors
chr17	56492740	56492740	C	A	exonic	RNF43	ring finger protein 43	nonsynonymous SNV	p.G67C		1	0	0	N	ID=COSM3691712;OCCURENCE=1(large_intestine)	Porcupine inhibitors
chr17	60742236	60742236	G	A	exonic	MRC2	mannose receptor C type 2	nonsynonymous SNV	p.R149H	rs757362633	0	0	0	N	ID=COSM2794378;OCCURENCE=2(liver)	.
chr17	61498499	61498499	G	A	exonic	TANC2	tetratricopeptide repeat, ankyrin repeat and coiled-coil containing 2	nonsynonymous SNV	p.R1729H	rs961824372	0	0	0	N	ID=COSM4579962,COSM4579961;OCCURENCE=1(bone)	.
chr17	61973865	61973865	G	C	exonic	CSH1	chorionic somatomammotropin hormone 1	nonsynonymous SNV	p.P3A	rs1130686	0	0	0	N	ID=COSM3932696;OCCURENCE=1(haematopoietic_and_lymphoid_tissue),1(urinary_tract),1(pancreas),1(thyroid),1(upper_aerodigestive_tract)	.	MARIJUANA
chr17	62007455	62007455	C	T	exonic	CD79B	CD79b molecule	nonsynonymous SNV	p.G138S	rs121912424	0	0	0	D	ID=COSM332713;OCCURENCE=1(lung)	.	POLATUZUMAB VEDOTIN
chr17	62145610	62145610	G	A	exonic	ERN1	endoplasmic reticulum to nucleus signaling 1	nonsynonymous SNV	p.R174W	rs369096989	0	0	0	N	ID=COSM6656224,COSM6656223;OCCURENCE=1(large_intestine)	.	COMPOUND 34 [PMID: 24749861]
chr17	62291306	62291306	G	A	exonic	TEX2	testis expressed 2	nonsynonymous SNV	p.S91L	rs201071171	0	0	0	N	ID=COSM707639;OCCURENCE=1(skin),1(lung),1(large_intestine)	.
chr17	70120247	70120247	C	T	exonic	SOX9	SRY-box 9	stopgain	p.Q417X	rs886043831	0	0	0		ID=COSM4729229;OCCURENCE=2(large_intestine)	.
chr17	71232045	71232045	G	A	exonic	C17orf80	chromosome 17 open reading frame 80	nonsynonymous SNV	p.A142T	rs144121476	0	0	0	N	ID=COSM6277570,COSM6277571;OCCURENCE=1(liver),1(large_intestine)	.
chr17	72477944	72477944	G	A	exonic	CD300A	CD300a molecule	nonsynonymous SNV	p.R249K	rs140008381	0	0	0	N	ID=COSM107720;OCCURENCE=1(skin)	.
chr17	72619748	72619748	G	A	exonic	CD300E	CD300e molecule	nonsynonymous SNV	p.P46S		0	0	0	N	ID=COSM3362348,COSM3362347;OCCURENCE=1(kidney)	.
chr17	73949673	73949673	G	A	exonic	ACOX1	acyl-CoA oxidase 1	nonsynonymous SNV	p.P268L		0	0	0	D	ID=COSM4658902,COSM4658901;OCCURENCE=2(large_intestine)	.
chr17	74276228	74276228	C	T	exonic	QRICH2	glutamine rich 2	nonsynonymous SNV	p.R1379H	rs772000651	0	0	0	D	ID=COSM3403233;OCCURENCE=1(central_nervous_system)	.
chr17	74288410	74288410	C	T	exonic	QRICH2	glutamine rich 2	nonsynonymous SNV	p.G634S	rs80109605	0	0	0	N	ID=COSM3755887;OCCURENCE=1(liver),3(skin),4(prostate),1(cervix),3(thyroid),7(upper_aerodigestive_tract),7(large_intestine)	.
chr17	74625437	74625437	G	A	exonic	ST6GALNAC1	ST6 N-acetylgalactosaminide alpha-2,6-sialyltransferase 1	nonsynonymous SNV	p.T163M	rs775223600	0	0	0	N	ID=COSM1324829;OCCURENCE=1(ovary)	.
chr17	76046071	76046071	G	A	exonic	TNRC6C	trinucleotide repeat containing 6C	nonsynonymous SNV	p.A310T		0	0	0	N	ID=COSM5364310,COSM5364311;OCCURENCE=1(large_intestine)	.
chr17	77102848	77102848	G	A	exonic	RBFOX3	RNA binding fox-1 homolog 3	nonsynonymous SNV	p.T81M	rs748950439	0	0	0	N	ID=COSM5461423,COSM5461422;OCCURENCE=1(large_intestine)	.
chr17	78013876	78013876	C	T	exonic	CCDC40	coiled-coil domain containing 40	nonsynonymous SNV	p.P120L	rs758440737	0	0	0	N	ID=COSM5603097,COSM5603098,COSM5603096;OCCURENCE=1(skin)	.
chr17	78058567	78058567	G	A	exonic	CCDC40	coiled-coil domain containing 40	nonsynonymous SNV	p.G672D		0	0	0	N	ID=COSM3523274,COSM3523273;OCCURENCE=1(skin)	.
chr17	78064092	78064092	G	A	exonic	CCDC40	coiled-coil domain containing 40	nonsynonymous SNV	p.R996H		0	0	0	N	ID=COSM5433257;OCCURENCE=4(breast),1(oesophagus),1(large_intestine)	.
chr17	78184627	78184627	G	A	exonic	SGSH	N-sulfoglucosamine sulfohydrolase	nonsynonymous SNV	p.S378F		0	0	0	D	ID=COSM1750385;OCCURENCE=2(urinary_tract)	.
chr17	79860514	79860514	G	A	exonic	NPB	neuropeptide B	nonsynonymous SNV	p.V121I	rs201542175	0	0	0	D	ID=COSM3796225;OCCURENCE=1(urinary_tract)	.
chr17	80333270	80333270	G	A	exonic	UTS2R	urotensin 2 receptor	nonsynonymous SNV	p.R357H	rs372316040	0	0	0	N	ID=COSM6386095;OCCURENCE=1(thyroid)	.	PALOSURAN
chr17	80585163	80585163	C	T	exonic	WDR45B	WD repeat domain 45B	nonsynonymous SNV	p.M83I		0	0	0	N	ID=COSM4843259;OCCURENCE=1(cervix)	.
chr17	80726405	80726405	G	A	exonic	TBCD	tubulin folding cofactor D	nonsynonymous SNV	p.R182Q	rs567077237	0	0	0	N	ID=COSM6797648;OCCURENCE=1(large_intestine)	.
chr17	80788710	80788710	C	T	exonic	ZNF750	zinc finger protein 750	nonsynonymous SNV	p.A494T	rs377519504	0	0	0	N	ID=COSM248630;OCCURENCE=2(prostate)	.
chr18	2656168	2656168	G	C	exonic	SMCHD1	structural maintenance of chromosomes flexible hinge domain containing 1	nonsynonymous SNV	p.D32H		0	0	0	N	ID=COSM987373,COSM987372,COSM987371;OCCURENCE=1(endometrium)	.
chr18	2778215	2778215	C	T	exonic	SMCHD1	structural maintenance of chromosomes flexible hinge domain containing 1	nonsynonymous SNV	p.A1842V		0	0	0	N	ID=COSM178447,COSM178446,COSM178448;OCCURENCE=1(breast)	.
chr18	3215119	3215119	G	A	exonic	MYOM1	myomesin 1	nonsynonymous SNV	p.R35C		0	0	0	N	ID=COSM6720919,COSM6720920;OCCURENCE=1(large_intestine)	.
chr18	5891645	5891645	C	T	exonic	TMEM200C	transmembrane protein 200C	nonsynonymous SNV	p.A140T		0	0	0	N	ID=COSM1389460;OCCURENCE=1(large_intestine)	.
chr18	7955127	7955127	G	A	exonic	PTPRM	protein tyrosine phosphatase, receptor type M	nonsynonymous SNV	p.V283I	rs148967648	0	0	0	N	ID=COSM4276946,COSM314598;OCCURENCE=1(pancreas),2(lung),1(central_nervous_system)	.	COMPOUND 8A [PMID: 23713581]
chr18	8824908	8824908	G	A	exonic	MTCL1	microtubule crosslinking factor 1	nonsynonymous SNV	p.D1453N	rs761092086	0	0	0	N	ID=COSM4728929,COSM4728928;OCCURENCE=2(large_intestine)	.
chr18	11886572	11886572	C	T	exonic	MPPE1	metallophosphoesterase 1	nonsynonymous SNV	p.A265T		0	0	0	N	ID=COSM3742546;OCCURENCE=1(liver),1(large_intestine)	.
chr18	13645244	13645244	C	T	exonic	LDLRAD4	low density lipoprotein receptor class A domain containing 4	nonsynonymous SNV	p.P170L		0	0	0	D	ID=COSM5940773,COSM5940772;OCCURENCE=1(skin)	.
chr18	18586428	18586428	C	T	exonic	ROCK1	Rho associated coiled-coil containing protein kinase 1	nonsynonymous SNV	p.R590Q	rs141266099	0	0	0	N	ID=COSM986894;OCCURENCE=1(endometrium)	.	VEROSUDIL; CETHRIN; COMPOUND 35 [PMID: 20684608]; SAR-407899; INS117548; GSK429286A; RHO-KINASE INHIBITOR; DE-104; COMPOUND 33 [PMID: 19364658]; COMPOUND 22 [PMID: 20462760]; Y27632; KD025; GSK269962A; AT-13148; Y-39983; SAR407899; FASUDIL; AMA0076; AR-12286; VEROSUDIL; RKI-1447; SAR407899
chr18	23615801	23615801	C	T	exonic	SS18	SS18, nBAF chromatin remodeling complex subunit	nonsynonymous SNV	p.E323K	rs761086778	0	0	0	N	ID=COSM4904314;OCCURENCE=1(skin)	.
chr18	25572744	25572744	C	T	exonic	CDH2	cadherin 2	nonsynonymous SNV	p.D407N	rs568089577	0	0	0	D	ID=COSM173705;OCCURENCE=1(stomach)	.	ADH-1; EXHERIN
chr18	29454571	29454571	G	A	exonic	TRAPPC8	trafficking protein particle complex 8	nonsynonymous SNV	p.R609C	rs577803701	0	0	0	D	ID=COSM270385;OCCURENCE=1(upper_aerodigestive_tract),2(large_intestine)	.
chr18	33271137	33271137	C	A	exonic	GALNT1	polypeptide N-acetylgalactosaminyltransferase 1	nonsynonymous SNV	p.F380L		0	0	0	N	ID=COSM6668957;OCCURENCE=1(haematopoietic_and_lymphoid_tissue),1(large_intestine)	.
chr18	33706228	33706228	C	T	exonic	SLC39A6	solute carrier family 39 member 6	nonsynonymous SNV	p.R248Q	rs770578350	0	0	0	N	ID=COSM6003386;OCCURENCE=1(prostate)	.
chr18	43310353	43310353	C	T	exonic	SLC14A1	solute carrier family 14 member 1 (Kidd blood group)	nonsynonymous SNV	p.S79L	rs867037711	0	0	0	N	ID=COSM1589429,COSM988428;OCCURENCE=1(oesophagus),2(large_intestine),1(central_nervous_system),1(endometrium)	.
chr18	44146297	44146297	C	T	exonic	LOXHD1	lipoxygenase homology domains 1	nonsynonymous SNV	p.R787H	rs916954027	0	0	0	D	ID=COSM2878097,COSM2878096;OCCURENCE=1(stomach)	.
chr18	46474795	46474795	G	-	exonic	SMAD7	SMAD family member 7	frameshift deletion	p.P209fs		0	0	0		ID=COSM1564050;OCCURENCE=1(stomach),6(large_intestine)	.	TPA
chr18	47404165	47404165	C	T	exonic	MYO5B	myosin VB	nonsynonymous SNV	p.G1122R	rs756171493	0	0	0	N	ID=COSM3821539;OCCURENCE=1(breast)	.
chr18	48446854	48446854	G	A	exonic	ME2	malic enzyme 2	nonsynonymous SNV	p.E255K	rs766432811	0	0	0	D	ID=COSM4839758;OCCURENCE=1(cervix)	.
chr18	48575096	48575096	G	A	exonic	SMAD4	SMAD family member 4	nonsynonymous SNV	p.R97H		1	0	0	D	ID=COSM291721,COSM4382624;OCCURENCE=1(stomach),2(large_intestine),1(endometrium)		Sapanisertib; CETUXIMAB; Gemcitabine; 5-FLUOROURACIL; Cisplatin; Crizotinib; N/A; Paclitaxel; Carboplatin; SD-093; TGF; Irinotecan; Imatinib; Alectinib
chr18	48604797	48604797	T	G	exonic	SMAD4	SMAD family member 4	nonsynonymous SNV	p.L540R		1	0	0	D	ID=COSM14165;OCCURENCE=1(stomach),1(pancreas),7(large_intestine)		Sapanisertib; CETUXIMAB; Gemcitabine; 5-FLUOROURACIL; Cisplatin; Crizotinib; N/A; Paclitaxel; Carboplatin; SD-093; TGF; Irinotecan; Imatinib; Alectinib
chr18	50278570	50278570	C	T	exonic	DCC	DCC netrin 1 receptor	nonsynonymous SNV	p.H80Y		0	0	0	N	ID=COSM5388225;OCCURENCE=1(skin)	.
chr18	50994326	50994326	C	T	exonic	DCC	DCC netrin 1 receptor	stopgain	p.R1228X	rs771557879	0	0	0		ID=COSM5706766;OCCURENCE=1(haematopoietic_and_lymphoid_tissue),1(pancreas)	.
chr18	56939808	56939808	G	A	exonic	RAX	retina and anterior neural fold homeobox	nonsynonymous SNV	p.R110W	rs202032096	0	0	0	N	ID=COSM2881065;OCCURENCE=1(prostate)	.
chr18	59483110	59483110	C	T	exonic	RNF152	ring finger protein 152	nonsynonymous SNV	p.R196H	rs529638296	0	0	0	N	ID=COSM2881304;OCCURENCE=1(prostate)	.
chr18	60642850	60642850	A	G	exonic	PHLPP1	PH domain and leucine rich repeat protein phosphatase 1	nonsynonymous SNV	p.I1326V		0	0	0	N	ID=COSM1480416,COSM1480417,COSM438299;OCCURENCE=1(breast)	.
chr18	60645526	60645526	C	T	exonic	PHLPP1	PH domain and leucine rich repeat protein phosphatase 1	nonsynonymous SNV	p.T1339M	rs773095187	0	0	0	N	ID=COSM4714128,COSM4714130,COSM4714129;OCCURENCE=2(large_intestine)	.
chr18	67855397	67855397	C	T	exonic	RTTN	rotatin	nonsynonymous SNV	p.E418K		0	0	0	N	ID=COSM6770492,COSM6770491;OCCURENCE=1(large_intestine)	.
chr18	70209065	70209065	G	A	exonic	CBLN2	cerebellin 2 precursor	nonsynonymous SNV	p.R111C		0	0	0	D	ID=COSM5743913;OCCURENCE=1(small_intestine)	.
chr18	77134080	77134080	G	A	exonic	ATP9B	ATPase phospholipid transporting 9B (putative)	nonsynonymous SNV	p.A1085T	rs772344558	0	0	0	D	ID=COSM6215166;OCCURENCE=1(prostate)	.
chr18	77170940	77170940	C	T	exonic	NFATC1	nuclear factor of activated T-cells 1	nonsynonymous SNV	p.P222L		0	0	0	D	ID=COSM6878024,COSM6878023;OCCURENCE=1(skin)	.
chr19	1044693	1044693	G	A	exonic	ABCA7	ATP binding cassette subfamily A member 7	nonsynonymous SNV	p.A389T		0	0	0	D	ID=COSM6384911;OCCURENCE=1(thyroid)	.
chr19	1058871	1058871	C	T	exonic	ABCA7	ATP binding cassette subfamily A member 7	nonsynonymous SNV	p.R1778C	rs145480594	0	0	0	D	ID=COSM6049474;OCCURENCE=1(large_intestine)	.
chr19	1219402	1219402	C	T	exonic	STK11	serine/threonine kinase 11	stopgain	p.Q152X		1	0	0		ID=COSM96526,COSM6557206;OCCURENCE=2(lung)	Everlolims, Temsirolimus, MTOR inhibitors, Dasatinib, src inhibitors, FAK inhibitors, Phenformin	EVEROLIMUS; Phenformin; SAR245409; Cisplatin; Sapanisertib; Selumetinib; Sirolimus; Docetaxel; inhibitor; CI-1040; RDEA119; Metformin; Radiotherapy; SELUMETINIB (AZD6244); MEK inhibitor; XL147; MEK; LANADELUMAB; PF-05212384; MK-1775; PKI-402; Trametinib; Everolimus; MLN0128; PD-0325901; GDC-0941; DOCETAXEL; unspecified PD-1 antibody; AZD8055; Everolimus; Phenformin
chr19	1434903	1434903	C	T	exonic	DAZAP1	DAZ associated protein 1	stopgain	p.R406X		0	0	0		ID=COSM5414184;OCCURENCE=2(haematopoietic_and_lymphoid_tissue)	.
chr19	2130440	2130440	G	A	exonic	AP3D1	adaptor related protein complex 3 delta 1 subunit	nonsynonymous SNV	p.R187W	rs766235867	0	0	0	D	ID=COSM3989867,COSM3989866;OCCURENCE=1(kidney)	.
chr19	3179131	3179131	C	T	exonic	S1PR4	sphingosine-1-phosphate receptor 4	nonsynonymous SNV	p.A114V	rs762051085	0	0	0	N	ID=COSM4076695,COSM4076694;OCCURENCE=1(stomach)	.	VPC03090-P; FINGOLIMOD HYDROCHLORIDE; ASP4058; AFD(R); COMPOUND 5C [PMID: 27894870]; FTY720-PHOSPHATE; PHYTOSPHINGOSINE 1-PHOSPHATE; COMPOUND 26 [PMID: 16190743]; AMISELIMOD HYDROCHLORIDE; OZANIMOD; DIHYDROSPHINGOSINE 1-PHOSPHATE; COMPOUND 43 [PMID: 26751273]; PONESIMOD; SPHINGOSINE 1-PHOSPHATE; SIPONIMOD; ETRASIMOD
chr19	3179809	3179809	G	A	exonic	S1PR4	sphingosine-1-phosphate receptor 4	nonsynonymous SNV	p.R340Q	rs199744093	0	0	0	N	ID=COSM4988454,COSM4988453;OCCURENCE=1(soft_tissue),1(large_intestine)	.	VPC03090-P; FINGOLIMOD HYDROCHLORIDE; ASP4058; AFD(R); COMPOUND 5C [PMID: 27894870]; FTY720-PHOSPHATE; PHYTOSPHINGOSINE 1-PHOSPHATE; COMPOUND 26 [PMID: 16190743]; AMISELIMOD HYDROCHLORIDE; OZANIMOD; DIHYDROSPHINGOSINE 1-PHOSPHATE; COMPOUND 43 [PMID: 26751273]; PONESIMOD; SPHINGOSINE 1-PHOSPHATE; SIPONIMOD; ETRASIMOD
chr19	3595868	3595868	G	A	exonic	TBXA2R	thromboxane A2 receptor	nonsynonymous SNV	p.R284C	rs200728850	0	0	0	N	ID=COSM6798037,COSM6798036;OCCURENCE=1(large_intestine)	.	SERATRODAST; BIBV 308; [3H]U46619; AGN 191976; CYCLOSPORINE; [125I]SQ-29548; CLOPROSTENOL; KW-3635; FUROSEMIDE; S-5751; 10,10-DIFLUORO TXA2; [125I]SAP; I-BOP; [3H]SQ-29548; BUTAPROST (FREE ACID FORM); RAMATROBAN; PGF2α; DALTROBAN; MB-28767; FLUPROSTENOL; DOMITROBAN; RAMATROBAN; [125I]BOP; PGE2; ILOPROST; SQ-29548; AH23848; CARBACYCLIN; ONO-3708; RIDOGREL; U46609; IFETROBAN; VAPIPROST; [3H]S-145; …
chr19	3600302	3600302	C	T	exonic	TBXA2R	thromboxane A2 receptor	nonsynonymous SNV	p.V111I		0	0	0	N	ID=COSM6887780,COSM6887779;OCCURENCE=1(skin)	.	SERATRODAST; BIBV 308; [3H]U46619; AGN 191976; CYCLOSPORINE; [125I]SQ-29548; CLOPROSTENOL; KW-3635; FUROSEMIDE; S-5751; 10,10-DIFLUORO TXA2; [125I]SAP; I-BOP; [3H]SQ-29548; BUTAPROST (FREE ACID FORM); RAMATROBAN; PGF2α; DALTROBAN; MB-28767; FLUPROSTENOL; DOMITROBAN; RAMATROBAN; [125I]BOP; PGE2; ILOPROST; SQ-29548; AH23848; CARBACYCLIN; ONO-3708; RIDOGREL; U46609; IFETROBAN; VAPIPROST; [3H]S-145; …
chr19	3746516	3746516	G	A	exonic	TJP3	tight junction protein 3	nonsynonymous SNV	p.A715T	rs777190792	0	0	0	D	ID=COSM5550367;OCCURENCE=1(prostate)	.
chr19	3910853	3910853	C	T	exonic	ATCAY	ATCAY, caytaxin	nonsynonymous SNV	p.R278W	rs376658701	0	0	0	D	ID=COSM259546,COSM4920153;OCCURENCE=1(liver),2(large_intestine)	.
chr19	4217057	4217057	G	A	exonic	ANKRD24	ankyrin repeat domain 24	nonsynonymous SNV	p.G724R		0	0	0	N	ID=COSM228214,COSM228213;OCCURENCE=1(skin)	.
chr19	5231336	5231336	G	A	exonic	PTPRS	protein tyrosine phosphatase, receptor type S	nonsynonymous SNV	p.R715C	rs776822913	0	0	0	D	ID=COSM6759954,COSM6759955,COSM6759956;OCCURENCE=1(large_intestine)	.	ALENDRONATE; ETIDRONIC ACID; COMPOUND 7B [HAFTCHENARY ET AL., 2013]
chr19	5244392	5244392	C	T	exonic	PTPRS	protein tyrosine phosphatase, receptor type S	nonsynonymous SNV	p.V365I	rs377318412	0	0	0	N	ID=COSM5116753,COSM5116754,COSM6759934;OCCURENCE=1(bone),1(large_intestine)	.	ALENDRONATE; ETIDRONIC ACID; COMPOUND 7B [HAFTCHENARY ET AL., 2013]
chr19	5866956	5866956	C	T	exonic	FUT5	fucosyltransferase 5	nonsynonymous SNV	p.E261K	rs200111389	0	0	0	D	ID=COSM6434597;OCCURENCE=1(thyroid)	.
chr19	6479005	6479005	C	T	exonic	DENND1C	DENN domain containing 1C	nonsynonymous SNV	p.R80H	rs564918026	0	0	0	N	ID=COSM6642279,COSM6642280;OCCURENCE=1(large_intestine)	.
chr19	6702545	6702545	C	T	exonic	C3	complement C3	nonsynonymous SNV	p.R764Q	rs143642234	0	0	0	D	ID=COSM106659;OCCURENCE=2(NS),2(skin)	.	POT-4
chr19	7505029	7505029	C	T	exonic	ARHGEF18	Rho/Rac guanine nucleotide exchange factor 18	nonsynonymous SNV	p.A68V		0	0	0	N	ID=COSM1397525;OCCURENCE=1(large_intestine)	.
chr19	8563791	8563791	C	T	exonic	PRAM1	PML-RARA regulated adaptor molecule 1	nonsynonymous SNV	p.E301K		0	0	0	N	ID=COSM6754743;OCCURENCE=1(large_intestine)	.
chr19	8609213	8609213	C	T	exonic	MYO1F	myosin IF	nonsynonymous SNV	p.A498T	rs751748703	0	0	0	N	ID=COSM4083069;OCCURENCE=1(stomach)	.
chr19	8807878	8807878	C	T	exonic	ACTL9	actin like 9	nonsynonymous SNV	p.A392T		0	0	0	N	ID=COSM4128018;OCCURENCE=1(ovary),1(prostate)	.
chr19	8808138	8808138	G	-	exonic	ACTL9	actin like 9	frameshift deletion	p.P305fs		0	0	0		ID=COSM2730689;OCCURENCE=1(large_intestine)	.
chr19	8959697	8959697	G	A	exonic	MUC16	mucin 16, cell surface associated	nonsynonymous SNV	p.R14479C	rs572151289	0	0	0	N	ID=COSM5748989;OCCURENCE=1(pancreas)	.	ABAGOVOMAB; DIFFERENTIATING AGENTS; DOCETAXEL; CYCLOSPORINE; N/A; TOPOTECAN; B43.13; ABAGOVOMAB; OREGOVOMAB; OREGOVAMAB; SODIUM BUTYRATE; TAMOXIFEN; BUSERELIN ACETATE; ETOPOSIDE; IFN
chr19	9062148	9062148	C	T	exonic	MUC16	mucin 16, cell surface associated	nonsynonymous SNV	p.G8433E	rs199710816	0	0	0	N	ID=COSM715402,COSM715404,COSM715403;OCCURENCE=1(lung)	.	ABAGOVOMAB; DIFFERENTIATING AGENTS; DOCETAXEL; CYCLOSPORINE; N/A; TOPOTECAN; B43.13; ABAGOVOMAB; OREGOVOMAB; OREGOVAMAB; SODIUM BUTYRATE; TAMOXIFEN; BUSERELIN ACETATE; ETOPOSIDE; IFN
chr19	10602863	10602863	C	T	exonic	KEAP1	kelch like ECH associated protein 1	nonsynonymous SNV	p.V239M		1	0	0	D	ID=COSM5712866;OCCURENCE=1(central_nervous_system)	.	BARDOXOLONE METHYL; DIMETHYL FUMARATE
chr19	10625377	10625377	G	A	exonic	S1PR5	sphingosine-1-phosphate receptor 5	nonsynonymous SNV	p.S104F	rs910975294	0	0	0	N	ID=COSM1162541;OCCURENCE=1(pancreas)	.	Siponimod; FINGOLIMOD HYDROCHLORIDE; AMISELIMOD HYDROCHLORIDE
chr19	11040221	11040221	A	G	exonic	TIMM29	translocase of inner mitochondrial membrane 29	nonsynonymous SNV	p.N209S		0	0	0	D	ID=COSM6614915;OCCURENCE=1(large_intestine)	.
chr19	11101932	11101932	G	A	exonic	SMARCA4	SWI/SNF related, matrix associated, actin dependent regulator of chromatin, subfamily a, member 4	nonsynonymous SNV	p.R451H		1	0	0	D	ID=COSM1266232,COSM1266233;OCCURENCE=1(stomach)	HDAC	VINORELBINE; CISPLATIN; PFI-3; RETINOIC ACID
chr19	11132513	11132513	C	T	exonic	SMARCA4	SWI/SNF related, matrix associated, actin dependent regulator of chromatin, subfamily a, member 4	nonsynonymous SNV	p.T910M		1	0	T910M	D	ID=COSM1226753,COSM88025;OCCURENCE=2(stomach),2(kidney),3(pancreas),1(lung),2(large_intestine),7(central_nervous_system),1(biliary_tract)	HDAC	VINORELBINE; CISPLATIN; PFI-3; RETINOIC ACID
chr19	12792466	12792466	C	G	exonic	DHPS	deoxyhypusine synthase	nonsynonymous SNV	p.G39R		0	0	0	D	ID=COSM3528794;OCCURENCE=1(skin)	.	DEOXYSPERGUALIN
chr19	12882216	12882216	G	A	exonic	HOOK2	hook microtubule tethering protein 2	nonsynonymous SNV	p.R199W		0	0	0	N	ID=COSM3528837;OCCURENCE=1(skin)	.
chr19	13189496	13189496	C	T	exonic	NFIX	nuclear factor I X	nonsynonymous SNV	p.P342L	rs771523710	0	0	0	N	ID=COSM3362673,COSM3362671,COSM3362672;OCCURENCE=1(kidney)	.
chr19	13482541	13482541	G	A	exonic	CACNA1A	calcium voltage-gated channel subunit alpha1 A	stopgain	p.R198X		0	0	0		ID=COSM991707,COSM991708,COSM1589764,COSM991706;OCCURENCE=1(skin),1(endometrium)	.	PREGABALIN; GABAPENTIN ENACARBIL; NISOLDIPINE; GABAPENTIN; IMAGABALIN; ATAGABALIN; BEPRIDIL HYDROCHLORIDE; ELPETRIGINE; PREGABALIN; BEPRIDIL; BEPRIDIL; PREGABALIN; NISOLDIPINE
chr19	13565991	13565991	G	A	exonic	CACNA1A	calcium voltage-gated channel subunit alpha1 A	nonsynonymous SNV	p.A110V	rs1085307798	0	0	0	D	ID=COSM1199168,COSM1199169,COSM1199167;OCCURENCE=2(large_intestine)	.	PREGABALIN; GABAPENTIN ENACARBIL; NISOLDIPINE; GABAPENTIN; IMAGABALIN; ATAGABALIN; BEPRIDIL HYDROCHLORIDE; ELPETRIGINE; PREGABALIN; BEPRIDIL; BEPRIDIL; PREGABALIN; NISOLDIPINE
chr19	14574736	14574736	C	T	exonic	PKN1	protein kinase N1	nonsynonymous SNV	p.T537I	rs763827649	0	0	0	N	ID=COSM3970745,COSM3970746;OCCURENCE=1(central_nervous_system)	.	COMPOUND 20 [PMID: 22136433]; STAUROSPORINE; TOFACITINIB; SOPHORETIN; INGENOL MEBUTATE; RKI-1447
chr19	14863305	14863305	T	C	exonic	ADGRE2	adhesion G protein-coupled receptor E2	nonsynonymous SNV	p.M531V	rs61731999	0	0	0	N	ID=COSM4770136;OCCURENCE=1(pancreas),1(lung),2(thyroid),1(biliary_tract)	.
chr19	15291543	15291543	G	A	exonic	NOTCH3	notch 3	nonsynonymous SNV	p.R1031C		0	0	0	D	ID=COSM294622;OCCURENCE=1(large_intestine)	.	RO4929097; REGN421; PF-03084014; MK0752; TAREXTUMAB; OMP-59R5
chr19	15512368	15512368	G	A	exonic	AKAP8L	A-kinase anchoring protein 8 like	nonsynonymous SNV	p.R137C	rs369867622	0	0	0	N	ID=COSM5474077,COSM5474078;OCCURENCE=1(large_intestine)	.
chr19	15807754	15807754	G	A	exonic	CYP4F12	cytochrome P450 family 4 subfamily F member 12	nonsynonymous SNV	p.M478I		0	0	0	N	ID=COSM3529828;OCCURENCE=1(skin)	.
chr19	15905273	15905273	C	T	exonic	OR10H5	olfactory receptor family 10 subfamily H member 5	nonsynonymous SNV	p.R139W	rs145808850	0	0	0	N	ID=COSM305619;OCCURENCE=1(central_nervous_system)	.
chr19	15918036	15918036	C	T	exonic	OR10H1	olfactory receptor family 10 subfamily H member 1	nonsynonymous SNV	p.G271E		0	0	0	N	ID=COSM1711960;OCCURENCE=2(skin)	.
chr19	16045181	16045181	G	A	exonic	CYP4F11	cytochrome P450 family 4 subfamily F member 11	nonsynonymous SNV	p.P13L		0	0	0	D	ID=COSM4279028;OCCURENCE=1(large_intestine)	.
chr19	16918475	16918475	C	T	exonic	NWD1	NACHT and WD repeat domain containing 1	nonsynonymous SNV	p.T1272M	rs758051323	0	0	0	D	ID=COSM992558,COSM992559;OCCURENCE=1(liver),3(large_intestine),1(endometrium)	.
chr19	17032769	17032769	C	T	exonic	CPAMD8	C3 and PZP like, alpha-2-macroglobulin domain containing 8	nonsynonymous SNV	p.R1239H		0	0	0	N	ID=COSM1391348;OCCURENCE=1(kidney),1(large_intestine)	.
chr19	17104288	17104288	G	C	exonic	CPAMD8	C3 and PZP like, alpha-2-macroglobulin domain containing 8	nonsynonymous SNV	p.R449G		0	0	0	N	ID=COSM5958048;OCCURENCE=1(thyroid)	.
chr19	17450245	17450245	C	T	exonic	GTPBP3	GTP binding protein 3, mitochondrial	nonsynonymous SNV	p.R303W	rs752605508	0	0	0	N	ID=COSM6676935,COSM4075334;OCCURENCE=1(stomach),1(large_intestine)	.
chr19	17750711	17750711	G	A	exonic	UNC13A	unc-13 homolog A	nonsynonymous SNV	p.R1020C		0	0	0	D	ID=COSM1240607,COSM1240608;OCCURENCE=1(oesophagus)	.
chr19	17837242	17837242	G	A	exonic	MAP1S	microtubule associated protein 1S	nonsynonymous SNV	p.R350H		0	0	0	N	ID=COSM4075464;OCCURENCE=1(stomach)	.
chr19	18092792	18092792	G	A	exonic	KCNN1	potassium calcium-activated channel subfamily N member 1	nonsynonymous SNV	p.R258H		0	0	0	D	ID=COSM5565241,COSM5565240;OCCURENCE=1(prostate)	.	TAMAPIN; LEIUROTOXIN I; RILUZOLE; UCL1848; CM-TPMF; BICUCULLINE; LEI-DAB7; NS8593; GW542573X; CA2+; EBIO; DEQUALINIUM; TETRAETHYLAMMONIUM; SKA-31; UCL1684; APAMIN; NS309; B-TPMF; TUBOCURARINE; SKA-20
chr19	18273784	18273784	G	A	exonic	PIK3R2	phosphoinositide-3-kinase regulatory subunit 2	nonsynonymous SNV	p.G373R	rs587776934	0	0	G373R	D	ID=COSM993028;OCCURENCE=1(stomach),1(oesophagus),1(lung),1(upper_aerodigestive_tract),1(testis),3(large_intestine),3(endometrium)	.	PF-4691502; OMIPALISIB; PKI-587; BGT-226; BKM120; LY-3023414; ZSTK-474; SF1126; GSK2126458; DACTOLISIB; TASELISIB; PWT-33587; BUPARLISIB HYDROCHLORIDE; AZD-6482; WX-037; PKI-587; SONOLISIB; APITOLISIB; PWT33597; PI-103; XL147; GDC-0980; BAY80-6946; XL-765; COPANLISIB; RG-7666; GSK-1059615; GDC-0941; BYL719; SOPHORETIN; DS-7423; Panulisib; PX-866; PILARALISIB; PA-799; PF-04691502; BEZ235; Puquitin…
chr19	19371763	19371763	G	A	exonic	HAPLN4	hyaluronan and proteoglycan link protein 4	nonsynonymous SNV	p.R115W	rs774131618	0	0	0	D	ID=COSM3101136;OCCURENCE=1(large_intestine)	.
chr19	20308487	20308487	C	T	exonic	ZNF486	zinc finger protein 486	nonsynonymous SNV	p.T323M	rs548386025	0	0	0	N	ID=COSM993531,COSM993532;OCCURENCE=1(large_intestine),1(endometrium)	.
chr19	20727966	20727966	C	T	exonic	ZNF737	zinc finger protein 737	nonsynonymous SNV	p.R348K		0	0	0	N	ID=COSM4744865,COSM148546;OCCURENCE=1(stomach),3(liver),1(upper_aerodigestive_tract),2(large_intestine)	.
chr19	22363864	22363864	G	A	exonic	ZNF676	zinc finger protein 676	nonsynonymous SNV	p.H219Y		0	0	0	D	ID=COSM6832319;OCCURENCE=1(large_intestine)	.
chr19	23543539	23543539	C	A	exonic	ZNF91	zinc finger protein 91	nonsynonymous SNV	p.G748C		0	0	0	D	ID=COSM474473,COSM1645762;OCCURENCE=1(kidney)	.
chr19	29699033	29699033	T	C	exonic	UQCRFS1	ubiquinol-cytochrome c reductase, Rieske iron-sulfur polypeptide 1	nonsynonymous SNV	p.I83V	rs762169393	0	0	0	N	ID=COSM474494;OCCURENCE=1(breast),3(kidney),2(pancreas),1(cervix),1(thyroid),2(endometrium)	.
chr19	31040061	31040061	G	A	exonic	ZNF536	zinc finger protein 536	nonsynonymous SNV	p.D1179N	rs762646976	0	0	0	N	ID=COSM271982;OCCURENCE=1(NS),5(skin),1(large_intestine)	.
chr19	31767826	31767826	C	T	exonic	TSHZ3	teashirt zinc finger homeobox 3	nonsynonymous SNV	p.R958Q	rs1004928160	0	0	0	D	ID=COSM994478,COSM994479;OCCURENCE=1(endometrium)	.
chr19	33122327	33122327	G	A	exonic	ANKRD27	ankyrin repeat domain 27	nonsynonymous SNV	p.P397L		0	0	0	N	ID=COSM5893997;OCCURENCE=1(skin)	.
chr19	33517507	33517507	C	T	exonic	RHPN2	rhophilin Rho GTPase binding protein 2	nonsynonymous SNV	p.V73M	rs758448454	0	0	0	N	ID=COSM139130;OCCURENCE=1(stomach),1(soft_tissue),1(pancreas),3(liver),1(oesophagus),2(skin),1(lung),1(thyroid),1(central_nervous_system)	.
chr19	34868414	34868414	C	T	exonic	GPI	glucose-6-phosphate isomerase	nonsynonymous SNV	p.R152W	rs754398233	0	0	0	D	ID=COSM1734458;OCCURENCE=1(pancreas)	.	6-AN; FDG; HEREGULIN
chr19	35793392	35793392	G	A	exonic	MAG	myelin associated glycoprotein	nonsynonymous SNV	p.V338I	rs201757442	0	0	0	N	ID=COSM1214207,COSM1214206;OCCURENCE=1(large_intestine)	.	GSK-249320
chr19	35850448	35850448	G	A	exonic	FFAR3	free fatty acid receptor 3	nonsynonymous SNV	p.R219Q	rs544946440	0	0	0	D	ID=COSM5365228;OCCURENCE=4(large_intestine)	.
chr19	35850577	35850577	C	T	exonic	FFAR3	free fatty acid receptor 3	nonsynonymous SNV	p.T262M	rs141433014	0	0	0	N	ID=COSM3970920;OCCURENCE=1(large_intestine),1(central_nervous_system)	.
chr19	36159533	36159533	C	T	exonic	UPK1A	uroplakin 1A	nonsynonymous SNV	p.R88C	rs61730228	0	0	0	N	ID=COSM4739464;OCCURENCE=1(large_intestine)	.
chr19	36166854	36166854	C	T	exonic	UPK1A	uroplakin 1A	nonsynonymous SNV	p.T194M	rs377645091	0	0	0	N	ID=COSM295860;OCCURENCE=2(liver),3(large_intestine)	.
chr19	36221328	36221328	C	T	exonic	KMT2B	lysine methyltransferase 2B	nonsynonymous SNV	p.T1721M		1	0	0	N	ID=COSM5733321,COSM6821310;OCCURENCE=1(pancreas),1(large_intestine)	.
chr19	36503928	36503928	G	A	exonic	ALKBH6	alkB homolog 6	stopgain	p.R68X		0	0	0		ID=COSM995339;OCCURENCE=1(endometrium)	.
chr19	37619515	37619515	C	T	exonic	ZNF420	zinc finger protein 420	nonsynonymous SNV	p.A541V	rs149309776	0	0	0	N	ID=COSM3200414;OCCURENCE=1(large_intestine)	.
chr19	37853955	37853955	C	T	exonic	HKR1	HKR1, GLI-Kruppel zinc finger family member	stopgain	p.Q420X		0	0	0		ID=COSM439357,COSM5199047;OCCURENCE=1(breast)	.
chr19	38028578	38028578	C	T	exonic	ZNF793	zinc finger protein 793	nonsynonymous SNV	p.R340C	rs751883374	0	0	0	N	ID=COSM995754;OCCURENCE=1(large_intestine),1(endometrium)	.
chr19	38378961	38378961	C	T	exonic	WDR87	WD repeat domain 87	nonsynonymous SNV	p.E1784K		0	0	0	N	ID=COSM5541732,COSM5541731;OCCURENCE=1(NS)	.
chr19	38384058	38384058	C	T	exonic	WDR87	WD repeat domain 87	nonsynonymous SNV	p.R762H	rs202153162	0	0	0	N	ID=COSM4999275,COSM4999274;OCCURENCE=1(pancreas)	.
chr19	38976759	38976759	G	T	exonic	RYR1	ryanodine receptor 1	nonsynonymous SNV	p.G1822C		0	0	0	D	ID=COSM323159;OCCURENCE=1(lung)	.	RYANODINE; CA2+; PROCAINE; RUTHENIUM RED; MG2+; DANTROLENE; SURAMIN; ATP; DANTROLENE; DANTROLENE SODIUM; DANTROLENE; CAFFEINE
chr19	39360730	39360730	C	T	exonic	RINL	Ras and Rab interactor like	nonsynonymous SNV	p.G399R		0	0	0	N	ID=COSM6017482,COSM6017481;OCCURENCE=1(skin)	.
chr19	39440656	39440656	G	A	exonic	FBXO17	F-box protein 17	nonsynonymous SNV	p.R102C		0	0	0	N	ID=COSM3692742;OCCURENCE=1(large_intestine)	.
chr19	39735444	39735444	C	T	exonic	IFNL3	interferon lambda 3	nonsynonymous SNV	p.R55K	rs201018323	0	0	0	N	ID=COSM3223459;OCCURENCE=1(kidney)	.	Ombitasvir; Daclatasvir; Dasabuvir; Grazoprevir; Peginterferon Alfa-2b; Boceprevir; Ledipasvir; Simeprevir; Telaprevir; Paritaprevir; Velpatasvir; Elbasvir; Ritonavir; Sofosbuvir
chr19	40331377	40331377	G	A	exonic	FBL	fibrillarin	nonsynonymous SNV	p.R21C	rs762429726	0	0	0	N	ID=COSM6200742;OCCURENCE=1(stomach)	.
chr19	41132911	41132911	C	-	exonic	LTBP4	latent transforming growth factor beta binding protein 4	unknown	p.A1408fs	rs779161422	0	0	0		ID=COSM6028204,COSM1393858,COSM4336558,COSM6028203;OCCURENCE=2(large_intestine)	.
chr19	41285983	41285983	C	T	exonic	RAB4B	RAB4B, member RAS oncogene family	nonsynonymous SNV	p.H26Y		0	0	0	N	ID=COSM5031840;OCCURENCE=1(pancreas)	.
chr19	41355828	41355828	C	T	exonic	CYP2A6	cytochrome P450 family 2 subfamily A member 6	nonsynonymous SNV	p.V80M	rs77233796	0	0	0	D	ID=COSM6239697;OCCURENCE=2(liver)	.	COMPOUND 23 [PMID: 17125252]; COMPOUND 38A [PMID: 15634016]; COMPOUND 39A [PMID: 15634016]
chr19	41382432	41382432	C	T	exonic	CYP2A7	cytochrome P450 family 2 subfamily A member 7	nonsynonymous SNV	p.G435R		0	0	0	D	ID=COSM5056681,COSM5056680;OCCURENCE=1(stomach)	.
chr19	41622408	41622408	C	T	exonic	CYP2F1	cytochrome P450 family 2 subfamily F member 1	nonsynonymous SNV	p.R74W	rs762195176	0	0	0	N	ID=COSM4393503;OCCURENCE=1(prostate),2(large_intestine)	.
chr19	42355712	42355712	C	T	exonic	DMRTC2	DMRT like family C2	nonsynonymous SNV	p.P402L		0	0	0	D	ID=COSM712734;OCCURENCE=1(lung)	.
chr19	42474393	42474393	G	A	exonic	ATP1A3	ATPase Na+/K+ transporting subunit alpha 3	nonsynonymous SNV	p.P829L		0	0	0	D	ID=COSM4140686;OCCURENCE=1(ovary),1(NS)	.	DIGOXIN; DESLANOSIDE; ACETYLDIGITOXIN; DIGITOXIN
chr19	42859967	42859967	C	T	exonic	MEGF8	multiple EGF like domains 8	nonsynonymous SNV	p.S1401L	rs768453015	0	0	0	N	ID=COSM1394144;OCCURENCE=1(large_intestine)	.
chr19	42873010	42873010	G	A	exonic	MEGF8	multiple EGF like domains 8	nonsynonymous SNV	p.R2166H	rs370984978	0	0	0	N	ID=COSM6711256,COSM6711258,COSM6711257;OCCURENCE=1(large_intestine)	.
chr19	42880244	42880244	G	A	exonic	MEGF8	multiple EGF like domains 8	nonsynonymous SNV	p.V2619M	rs772954605	0	0	0	N	ID=COSM3287729;OCCURENCE=1(large_intestine)	.
chr19	43420328	43420328	G	A	exonic	PSG6	pregnancy specific beta-1-glycoprotein 6	stopgain	p.R126X	rs752118246	0	0	0		ID=COSM4965524,COSM4965523;OCCURENCE=1(pancreas)	.
chr19	43674272	43674272	C	T	exonic	PSG5	pregnancy specific beta-1-glycoprotein 5	nonsynonymous SNV	p.R421H	rs762496938	0	0	0	N	ID=COSM6757539;OCCURENCE=1(large_intestine)	.
chr19	44223807	44223807	C	T	exonic	IRGC	immunity related GTPase cinema	nonsynonymous SNV	p.P366L	rs779176184	0	0	0	N	ID=COSM6687326;OCCURENCE=1(large_intestine)	.
chr19	44273131	44273131	A	G	exonic	KCNN4	potassium calcium-activated channel subfamily N member 4	nonsynonymous SNV	p.M368T		0	0	0	D	ID=COSM6213657;OCCURENCE=1(prostate)	.	ICA-17043; SENICAPOC; COMPOUND RAC-16 [PMID: 15603962]; CHLORZOXAZONE; SENICAPOC; SKA-121; SKA-31; CHLORZOXAZONE; CLOTRIMAZOLE; CHARYBDOTOXIN; AVE0118; CHLORZOXAZONE; TRAM-34; NITRENDIPINE; EBIO; CA2+; CHARYBDOTOXIN; HALOFANTRINE; NS6180; RILUZOLE; MAUROTOXIN; DC-EBIO; CHARYBDOTOXIN-GLU32 ANALOG; NS309; QUININE
chr19	44417889	44417889	G	A	exonic	ZNF45	zinc finger protein 45	nonsynonymous SNV	p.R567W	rs763926972	0	0	0	N	ID=COSM1737291;OCCURENCE=1(central_nervous_system)	.
chr19	44470531	44470531	C	T	exonic	ZNF221	zinc finger protein 221	nonsynonymous SNV	p.H293Y	rs200704464	0	0	0	N	ID=COSM6054354;OCCURENCE=2(upper_aerodigestive_tract)	.
chr19	45911872	45911872	A	-	exonic	CD3EAP	CD3e molecule associated protein	frameshift deletion	p.N220fs	rs753626854	0	0	0		ID=COSM3104142;OCCURENCE=4(large_intestine)	.
chr19	46825222	46825222	C	T	exonic	HIF3A	hypoxia inducible factor 3 alpha subunit	nonsynonymous SNV	p.S445L	rs141145645	0	0	0	N	ID=COSM281697,COSM3536088,COSM3536087;OCCURENCE=1(skin),1(large_intestine)	.
chr19	48305550	48305550	G	A	exonic	TPRX1	tetrapeptide repeat homeobox 1	nonsynonymous SNV	p.P337S	rs75909117	0	0	0	N	ID=COSM1394961,COSM5828893;OCCURENCE=1(thyroid),1(large_intestine)	.
chr19	48305646	48305646	G	A	exonic	TPRX1	tetrapeptide repeat homeobox 1	nonsynonymous SNV	p.P305S	rs112842028	0	0	0	N	ID=COSM5826049,COSM3749526;OCCURENCE=9(large_intestine)	.
chr19	48953759	48953759	C	T	exonic	GRWD1	glutamate rich WD repeat containing 1	nonsynonymous SNV	p.L220F		0	0	0	N	ID=COSM4689039;OCCURENCE=2(large_intestine)	.
chr19	49110288	49110288	C	T	exonic	SPACA4	sperm acrosome associated 4	nonsynonymous SNV	p.T18M	rs147138042	0	0	0	D	ID=COSM3107599;OCCURENCE=1(stomach)	.
chr19	49131993	49131993	C	T	exonic	SPHK2	sphingosine kinase 2	nonsynonymous SNV	p.R372W	rs750305488	0	0	0	N	ID=COSM999035;OCCURENCE=1(endometrium)	.	ABC294640; ABC294640; PHENOXODIOL; ROME
chr19	49142645	49142645	G	T	exonic	CA11	carbonic anhydrase 11	nonsynonymous SNV	p.Q238K		0	0	0	N	ID=COSM1247048;OCCURENCE=1(oesophagus)	.
chr19	49216621	49216621	G	A	exonic	MAMSTR	MEF2 activating motif and SAP domain containing transcriptional regulator	nonsynonymous SNV	p.P384L		0	0	0	D	ID=COSM4460052,COSM4460053;OCCURENCE=1(skin),1(lung)	.
chr19	49558205	49558205	G	A	exonic	CGB7	chorionic gonadotropin beta subunit 7	nonsynonymous SNV	p.R26W	rs749912361	0	0	0	N	ID=COSM3783274;OCCURENCE=1(prostate)	.
chr19	49638145	49638145	G	A	exonic	PPFIA3	PTPRF interacting protein alpha 3	nonsynonymous SNV	p.R498Q	rs754546714	0	0	0	N	ID=COSM6003695;OCCURENCE=1(prostate)	.
chr19	49812327	49812327	T	G	exonic	SLC6A16	solute carrier family 6 member 16	nonsynonymous SNV	p.Q345H		0	0	0	D	ID=COSM4727667;OCCURENCE=1(large_intestine)	.
chr19	49846583	49846583	C	T	exonic	TEAD2	TEA domain transcription factor 2	nonsynonymous SNV	p.G332R	rs957477299	0	0	0	N	ID=COSM4080032;OCCURENCE=1(stomach)	.
chr19	50099808	50099808	C	T	exonic	PRR12	proline rich 12	nonsynonymous SNV	p.P739L		0	0	0		ID=COSM713396;OCCURENCE=1(lung)	.
chr19	50412113	50412113	C	T	exonic	NUP62	nucleoporin 62	nonsynonymous SNV	p.A318T	rs139269985	0	0	0	N	ID=COSM191945;OCCURENCE=2(large_intestine)	.
chr19	50434211	50434211	C	-	exonic	ATF5	activating transcription factor 5	frameshift deletion	p.L37fs	rs768611141	0	0	0		ID=COSM1395375;OCCURENCE=5(large_intestine)	.
chr19	50474960	50474960	C	G	exonic	SIGLEC16	sialic acid binding Ig like lectin 16 (gene/pseudogene)	nonsynonymous SNV	p.A345G	rs201054007	0	0	0		ID=COSM1153420,COSM999558;OCCURENCE=3(breast),1(haematopoietic_and_lymphoid_tissue)	.
chr19	50912486	50912486	G	A	exonic	POLD1	DNA polymerase delta 1, catalytic subunit	nonsynonymous SNV	p.R693Q		1	0	0	D	ID=COSM5805813,COSM5805812;OCCURENCE=2(liver),1(thyroid)	.	GEMCITABINE HYDROCHLORIDE; CLOFARABINE; CYTARABINE; FLUDARABINE PHOSPHATE
chr19	51220152	51220152	C	T	exonic	SHANK1	SH3 and multiple ankyrin repeat domains 1	nonsynonymous SNV	p.E9K		0	0	0	N	ID=COSM4538792;OCCURENCE=1(haematopoietic_and_lymphoid_tissue),1(skin)	.
chr19	51411936	51411936	G	A	exonic	KLK4	kallikrein related peptidase 4	nonsynonymous SNV	p.S125F		0	0	0	D	ID=COSM3727265;OCCURENCE=1(skin)	.	DERMOLASTIN; COMPOUND 33 [PMID: 19908842]
chr19	51519341	51519341	C	T	exonic	KLK10	kallikrein related peptidase 10	nonsynonymous SNV	p.R114H	rs146426256	0	0	0	D	ID=COSM999908;OCCURENCE=1(endometrium)	.
chr19	51920150	51920150	G	A	exonic	SIGLEC10	sialic acid binding Ig like lectin 10	nonsynonymous SNV	p.P159L	rs143118289	0	0	0	D	ID=COSM5856508;OCCURENCE=1(NS)	.
chr19	52001439	52001439	C	T	exonic	SIGLEC12	sialic acid binding Ig like lectin 12 (gene/pseudogene)	stopgain	p.W413X		0	0	0		ID=COSM6441275;OCCURENCE=1(skin)	.
chr19	52888049	52888049	C	A	exonic	ZNF880	zinc finger protein 880	nonsynonymous SNV	p.Q406K	rs75346003	0	0	0	N	ID=COSM1395920;OCCURENCE=1(lung),4(thyroid),5(upper_aerodigestive_tract),2(large_intestine),3(central_nervous_system)	.
chr19	52888050	52888050	A	G	exonic	ZNF880	zinc finger protein 880	nonsynonymous SNV	p.Q406R	rs76053634	0	0	0	N	ID=COSM1395921;OCCURENCE=2(kidney),2(thyroid),5(upper_aerodigestive_tract),2(large_intestine),3(central_nervous_system)	.
chr19	52941215	52941215	C	T	exonic	ZNF534	zinc finger protein 534	nonsynonymous SNV	p.L181F		0	0	0	N	ID=COSM4499418;OCCURENCE=1(skin)	.
chr19	53303182	53303182	T	C	exonic	ZNF28	zinc finger protein 28	nonsynonymous SNV	p.E639G	rs142391659	0	0	0	N	ID=COSM4286444,COSM4286443,COSM4286445;OCCURENCE=1(breast),1(pancreas),1(liver),1(large_intestine)	.
chr19	53303332	53303332	C	T	exonic	ZNF28	zinc finger protein 28	nonsynonymous SNV	p.R589Q	rs142442328	0	0	0	N	ID=COSM3990238,COSM3990237,COSM3990236;OCCURENCE=1(kidney),2(liver),1(biliary_tract)	.
chr19	53762371	53762371	A	T	exonic	VN1R2	vomeronasal 1 receptor 2	nonsynonymous SNV	p.Y248F		0	0	0	N	ID=COSM5962054;OCCURENCE=2(breast)	.
chr19	53770251	53770251	G	A	exonic	VN1R4	vomeronasal 1 receptor 4	nonsynonymous SNV	p.P223L		0	0	0	N	ID=COSM5390617;OCCURENCE=1(skin)	.
chr19	53884473	53884473	C	T	exonic	ZNF525	zinc finger protein 525	nonsynonymous SNV	p.S214F		0	0	0	N	ID=COSM2928745;OCCURENCE=1(skin)	.
chr19	53911344	53911344	G	T	exonic	ZNF765	zinc finger protein 765	nonsynonymous SNV	p.R179I	rs377536824	0	0	0	N	ID=COSM265143;OCCURENCE=1(large_intestine),1(endometrium)	.
chr19	54081001	54081001	C	T	exonic	ZNF331	zinc finger protein 331	nonsynonymous SNV	p.S396L		0	0	0	N	ID=COSM2928887;OCCURENCE=1(NS)	.
chr19	54081147	54081147	G	A	exonic	ZNF331	zinc finger protein 331	nonsynonymous SNV	p.G445R	rs774775516	0	0	0	D	ID=COSM4620089;OCCURENCE=1(upper_aerodigestive_tract),1(large_intestine)	.
chr19	54545038	54545038	G	A	exonic	VSTM1	V-set and transmembrane domain containing 1	nonsynonymous SNV	p.L196F		0	0	0	N	ID=COSM3538557,COSM4893653;OCCURENCE=1(skin)	.
chr19	54783445	54783445	C	T	exonic	LILRB2	leukocyte immunoglobulin like receptor B2	nonsynonymous SNV	p.G138E		0	0	0	N	ID=COSM3538681;OCCURENCE=2(skin)	.
chr19	54783691	54783691	C	T	exonic	LILRB2	leukocyte immunoglobulin like receptor B2	nonsynonymous SNV	p.A104T		0	0	0	N	ID=COSM3404584;OCCURENCE=1(stomach),1(central_nervous_system)	.
chr19	54802567	54802567	C	T	exonic	LILRA3	leukocyte immunoglobulin like receptor A3	nonsynonymous SNV	p.G309R		0	0	0	N	ID=COSM6701106;OCCURENCE=1(large_intestine)	.
chr19	55019321	55019321	G	A	exonic	LAIR2	leukocyte associated immunoglobulin like receptor 2	nonsynonymous SNV	p.A96T		0	0	0	N	ID=COSM1481491;OCCURENCE=1(breast)	.
chr19	55086411	55086411	G	A	exonic	LILRA2	leukocyte immunoglobulin like receptor A2	nonsynonymous SNV	p.R189H	rs567633305	0	0	0	N	ID=COSM6454216,COSM1291018;OCCURENCE=1(haematopoietic_and_lymphoid_tissue),1(upper_aerodigestive_tract)	.
chr19	55147987	55147987	G	C	exonic	LILRB1	leukocyte immunoglobulin like receptor B1	nonsynonymous SNV	p.E615Q	rs41308744	0	0	0	N	ID=COSM1129714;OCCURENCE=1(ovary),1(breast),4(haematopoietic_and_lymphoid_tissue),3(prostate),2(thyroid),1(upper_aerodigestive_tract),1(large_intestine)	.
chr19	55147988	55147988	A	C	exonic	LILRB1	leukocyte immunoglobulin like receptor B1	nonsynonymous SNV	p.E615A	rs77680604	0	0	0	N	ID=COSM3835733;OCCURENCE=1(ovary),1(breast),4(haematopoietic_and_lymphoid_tissue),2(pancreas),1(thyroid),1(upper_aerodigestive_tract)	.
chr19	55255357	55255357	G	C	exonic	KIR2DL3	killer cell immunoglobulin like receptor, two Ig domains and long cytoplasmic tail 3	nonsynonymous SNV	p.R162T	rs201504521	0	0	0	N	ID=COSM4287182,COSM328457;OCCURENCE=1(pancreas),3(upper_aerodigestive_tract)	.	IPH-2101; LIRILUMAB; IFN
chr19	55716805	55716805	G	A	exonic	PTPRH	protein tyrosine phosphatase, receptor type H	nonsynonymous SNV	p.H170Y	rs200319382	0	0	0	N	ID=COSM3990299;OCCURENCE=1(kidney),1(pancreas)	.
chr19	55872230	55872230	G	A	exonic	FAM71E2	family with sequence similarity 71 member E2	nonsynonymous SNV	p.R268C	rs1009126954	0	0	0	N	ID=COSM4985770;OCCURENCE=1(soft_tissue)	.
chr19	55889357	55889357	G	A	exonic	TMEM190	transmembrane protein 190	nonsynonymous SNV	p.R107Q	rs377206939	0	0	0	D	ID=COSM3893539;OCCURENCE=1(skin)	.
chr19	55944822	55944822	C	T	exonic	SHISA7	shisa family member 7	nonsynonymous SNV	p.D440N		0	0	0	D	ID=COSM4525234;OCCURENCE=1(skin)	.
chr19	55993117	55993117	C	T	exonic	ZNF628	zinc finger protein 628	nonsynonymous SNV	p.T186M		0	0	0	N	ID=COSM4081576,COSM4081575,COSM4081577;OCCURENCE=1(stomach)	.
chr19	56001670	56001670	C	T	exonic	SSC5D	scavenger receptor cysteine rich family member with 5 domains	nonsynonymous SNV	p.R161C	rs560855824	0	0	0	N	ID=COSM6205679;OCCURENCE=1(haematopoietic_and_lymphoid_tissue)	.
chr19	56041153	56041153	G	A	exonic	SBK2	SH3 domain binding kinase family member 2	nonsynonymous SNV	p.R332W		0	0	0	N	ID=COSM5013516,COSM5013517;OCCURENCE=1(kidney)	.
chr19	56204370	56204370	C	T	exonic	EPN1	epsin 1	nonsynonymous SNV	p.R497C	rs753965980	0	0	0	N	ID=COSM5716543,COSM5716542;OCCURENCE=5(skin)	.
chr19	56284217	56284217	A	T	exonic	RFPL4AL1	ret finger protein like 4A like 1	nonsynonymous SNV	p.E179V	rs138919845	0	0	0	N	ID=COSM5765424;OCCURENCE=2(large_intestine)	.
chr19	57132875	57132875	G	A	exonic	ZNF71	zinc finger protein 71	nonsynonymous SNV	p.A74T	rs141566979	0	0	0	N	ID=COSM193513;OCCURENCE=1(pancreas),1(central_nervous_system)	.
chr19	57325380	57325380	C	T	exonic	PEG3	paternally expressed 3	nonsynonymous SNV	p.G1477E		0	0	0	N	ID=COSM6743878,COSM6743879;OCCURENCE=1(large_intestine)	.
chr19	57328632	57328632	C	T	exonic	PEG3	paternally expressed 3	nonsynonymous SNV	p.R393H	rs1046467329	0	0	0	N	ID=COSM1564972,COSM1564973;OCCURENCE=1(large_intestine)	.
chr19	57335821	57335821	C	T	exonic	PEG3	paternally expressed 3	nonsynonymous SNV	p.R68Q	rs267605719	0	0	0	N	ID=COSM2971618,COSM2971619;OCCURENCE=2(NS)	.
chr19	57956263	57956263	C	T	exonic	ZNF749	zinc finger protein 749	nonsynonymous SNV	p.R583C		0	0	0	N	ID=COSM6832840,COSM6832841;OCCURENCE=1(large_intestine)	.
chr19	58117726	58117726	G	A	exonic	ZNF530	zinc finger protein 530	nonsynonymous SNV	p.R278H	rs201516823	0	0	0	N	ID=COSM2972785;OCCURENCE=1(liver)	.
chr19	58980668	58980668	C	T	exonic	ZNF324	zinc finger protein 324	nonsynonymous SNV	p.S39L		0	0	0	N	ID=COSM4460534;OCCURENCE=1(skin)	.
chr2	11706686	11706686	G	A	exonic	GREB1	growth regulation by estrogen in breast cancer 1	nonsynonymous SNV	p.V120M	rs764711785	0	0	0	D	ID=COSM716116,COSM716115,COSM716117;OCCURENCE=1(lung)	.
chr2	11955254	11955254	G	A	exonic	LPIN1	lipin 1	nonsynonymous SNV	p.G813R		0	0	0	D	ID=COSM5859977,COSM5859975,COSM5859976;OCCURENCE=1(NS)	.
chr2	17902510	17902510	G	A	exonic	SMC6	structural maintenance of chromosomes 6	nonsynonymous SNV	p.R275C	rs373857118	0	0	0	N	ID=COSM441548,COSM4815176;OCCURENCE=1(breast)	.
chr2	19553538	19553538	A	G	exonic	OSR1	odd-skipped related transciption factor 1	nonsynonymous SNV	p.V10A		0	0	0	N	ID=COSM2904698;OCCURENCE=1(large_intestine)	.
chr2	21234050	21234050	C	T	exonic	APOB	apolipoprotein B	nonsynonymous SNV	p.R1897H	rs199510126	0	0	0	N	ID=COSM169516;OCCURENCE=3(stomach),1(adrenal_gland),1(prostate),1(large_intestine)	.	ETHANOL; LOVASTATIN; LIGNAN; TKM-APOB; QUERCETIN; EPIGALLOCATECHIN GALLATE; PRAVASTATIN; DEXAMETHASONE; ALPHA-TOCOPHEROL; REVERSE TRANSCRIPTASE INHIBITOR; CORTISOL; EGCG; CHOLESTYRAMINE; NEVIRAPINE; FENOFIBRATE; CHONDROITIN; SPC4955; TRIFLUOPERAZINE; MIPOMERSEN; HEPARIN; ATORVASTATIN; SPC4955
chr2	21365747	21365747	C	T	exonic	TDRD15	tudor domain containing 15	nonsynonymous SNV	p.S1803F		0	0	0	N	ID=COSM6466911;OCCURENCE=1(lung)	.
chr2	25469540	25469540	C	T	exonic	DNMT3A	DNA methyltransferase 3 alpha	nonsynonymous SNV	p.A410T	rs764880874	1	0	0	D	ID=COSM5396712,COSM5396713;OCCURENCE=2(haematopoietic_and_lymphoid_tissue),1(skin)	DNAMT inhibitors	N/A; Daunorubicin; Decitabine; IDARUBICIN; DECITABINE; DECITABINE; AZACITIDINE
chr2	27522276	27522276	C	T	exonic	TRIM54	tripartite motif containing 54	nonsynonymous SNV	p.R169C	rs748843079	0	0	0	N	ID=COSM2939786,COSM2939787;OCCURENCE=1(central_nervous_system)	.
chr2	29249747	29249747	G	A	exonic	TOGARAM2	TOG array regulator of axonemal microtubules 2	nonsynonymous SNV	p.A628T	rs199667352	0	0	0	N	ID=COSM5794363;OCCURENCE=1(breast)	.
chr2	29404701	29404701	C	T	exonic	CLIP4	CAP-Gly domain containing linker protein family member 4	nonsynonymous SNV	p.P687L	rs373598789	0	0	0	D	ID=COSM4093762;OCCURENCE=1(stomach)	.
chr2	31147091	31147091	C	T	exonic	GALNT14	polypeptide N-acetylgalactosaminyltransferase 14	nonsynonymous SNV	p.R430Q	rs955498267	0	0	0	D	ID=COSM1020081;OCCURENCE=1(endometrium)	.
chr2	31154992	31154992	C	T	exonic	GALNT14	polypeptide N-acetylgalactosaminyltransferase 14	nonsynonymous SNV	p.V339I	rs764961383	0	0	0	N	ID=COSM5708184;OCCURENCE=1(haematopoietic_and_lymphoid_tissue)	.
chr2	32743396	32743396	C	T	exonic	BIRC6	baculoviral IAP repeat containing 6	stopgain	p.R3809X		0	0	0		ID=COSM6611625,COSM6611624;OCCURENCE=1(large_intestine)	.
chr2	33534521	33534521	G	T	exonic	LTBP1	latent transforming growth factor beta binding protein 1	nonsynonymous SNV	p.D1169Y		0	0	0	D	ID=COSM5615073,COSM5615074;OCCURENCE=1(lung)	.
chr2	37441067	37441067	G	A	exonic	CEBPZ	CCAAT/enhancer binding protein zeta	nonsynonymous SNV	p.R829W	rs372639283	0	0	0	N	ID=COSM1020713;OCCURENCE=1(endometrium)	.
chr2	39074204	39074204	G	A	exonic	DHX57	DExH-box helicase 57	nonsynonymous SNV	p.P726S		0	0	0	D	ID=COSM3581503;OCCURENCE=2(skin)	.
chr2	44457659	44457659	G	A	exonic	PPM1B	protein phosphatase, Mg2+/Mn2+ dependent 1B	nonsynonymous SNV	p.M414I		0	0	0	N	ID=COSM442932,COSM1134145;OCCURENCE=1(breast)	.
chr2	45235819	45235819	G	A	exonic	SIX2	SIX homeobox 2	nonsynonymous SNV	p.A144V	rs774627372	0	0	0	N	ID=COSM4618244;OCCURENCE=1(large_intestine)	.
chr2	45645513	45645513	G	A	exonic	SRBD1	S1 RNA binding domain 1	nonsynonymous SNV	p.T775M	rs367558918	0	0	0	N	ID=COSM6790023;OCCURENCE=1(large_intestine)	.
chr2	48040981	48040981	G	A	exonic	FBXO11	F-box protein 11	nonsynonymous SNV	p.R678C		0	0	0	D	ID=COSM5821655,COSM5821656;OCCURENCE=2(liver)	.
chr2	58315576	58315576	C	T	exonic	VRK2	vaccinia related kinase 2	stopgain	p.R149X	rs746927837	0	0	0		ID=COSM5973834;OCCURENCE=1(upper_aerodigestive_tract)	.
chr2	70122339	70122339	C	T	exonic	SNRNP27	small nuclear ribonucleoprotein U4/U6.U5 subunit 27	nonsynonymous SNV	p.R50C		0	0	0	D	ID=COSM5566285;OCCURENCE=2(prostate)	.
chr2	70392682	70392682	T	-	exonic	C2orf42	chromosome 2 open reading frame 42	frameshift deletion	p.K410fs		0	0	0		ID=COSM3056366;OCCURENCE=1(skin),7(large_intestine),1(biliary_tract)	.
chr2	71163196	71163196	C	T	exonic	ATP6V1B1	ATPase H+ transporting V1 subunit B1	nonsynonymous SNV	p.R38C	rs145773738	0	0	0	N	ID=COSM2997129;OCCURENCE=1(oesophagus)	.
chr2	71887771	71887771	G	A	exonic	DYSF	dysferlin	nonsynonymous SNV	p.V1665I	rs147056383	0	0	0	N	ID=COSM3972339,COSM3972338;OCCURENCE=1(stomach),1(prostate),1(upper_aerodigestive_tract),1(central_nervous_system)	.
chr2	73679277	73679277	G	T	exonic	ALMS1	ALMS1, centrosome and basal body associated protein	nonsynonymous SNV	p.A1874S		0	0	0	N	ID=COSM6046728;OCCURENCE=1(large_intestine)	.	PICROTOXININ; [3H]STRYCHNINE; β-ALANINE; TAURINE; GLYCINE; CYANOTRIPHENYLBORATE; TROPISETRON; ATROPINE; ZN2+; ETHANOL; IVERMECTIN
chr2	73800264	73800264	C	T	exonic	ALMS1	ALMS1, centrosome and basal body associated protein	nonsynonymous SNV	p.L3753F		0	0	0	N	ID=COSM4459427;OCCURENCE=1(skin)	.	PICROTOXININ; [3H]STRYCHNINE; β-ALANINE; TAURINE; GLYCINE; CYANOTRIPHENYLBORATE; TROPISETRON; ATROPINE; ZN2+; ETHANOL; IVERMECTIN
chr2	74754449	74754449	C	G	exonic	AUP1	AUP1, lipid droplet regulating VLDL assembly factor	nonsynonymous SNV	p.E335Q		0	0	0	D	ID=COSM443234;OCCURENCE=1(breast)	.
chr2	74761352	74761352	G	A	exonic	LOXL3	lysyl oxidase like 3	nonsynonymous SNV	p.R651W		0	0	0	D	ID=COSM5004998;OCCURENCE=1(haematopoietic_and_lymphoid_tissue)	.
chr2	79253856	79253856	G	A	exonic	REG3G	regenerating family member 3 gamma	nonsynonymous SNV	p.E32K		0	0	0	N	ID=COSM3583521;OCCURENCE=3(skin)	.
chr2	84771457	84771457	G	C	exonic	DNAH6	dynein axonemal heavy chain 6	nonsynonymous SNV	p.D255H		0	0	0	N	ID=COSM5025663,COSM5025662;OCCURENCE=1(breast)	.
chr2	85051303	85051303	G	A	exonic	TRABD2A	TraB domain containing 2A	nonsynonymous SNV	p.R370W		0	0	0	N	ID=COSM3001437,COSM3001438;OCCURENCE=1(large_intestine),1(central_nervous_system)	.
chr2	88478485	88478485	C	T	exonic	THNSL2	threonine synthase like 2	nonsynonymous SNV	p.P252L		0	0	0	N	ID=COSM5905505,COSM5905504;OCCURENCE=1(skin)	.
chr2	88748129	88748129	G	A	exonic	FOXI3	forkhead box I3	unknown			0	0	0		ID=COSM4446006;OCCURENCE=1(skin)	.
chr2	95770424	95770424	G	A	exonic	MRPS5	mitochondrial ribosomal protein S5	nonsynonymous SNV	p.R242C	rs913665792	0	0	0	D	ID=COSM266957;OCCURENCE=1(lung),1(large_intestine)	.
chr2	96076669	96076669	C	T	exonic	FAHD2A	fumarylacetoacetate hydrolase domain containing 2A	nonsynonymous SNV	p.R194C	rs566500770	0	0	0	D	ID=COSM5021308;OCCURENCE=1(bone)	.
chr2	96798441	96798441	G	A	exonic	ASTL	astacin like metalloendopeptidase	nonsynonymous SNV	p.R159C	rs145986421	0	0	0	D	ID=COSM2825270;OCCURENCE=1(large_intestine),1(central_nervous_system)	.
chr2	97586996	97586996	G	A	exonic	FAM178B	family with sequence similarity 178 member B	stopgain	p.Q638X		0	0	0		ID=COSM5397627;OCCURENCE=1(skin)	.
chr2	99012481	99012481	G	A	exonic	CNGA3	cyclic nucleotide gated channel alpha 3	nonsynonymous SNV	p.R287Q	rs104893614	0	0	0	D	ID=COSM1580002;OCCURENCE=1(large_intestine),1(central_nervous_system)	.	CYCLIC AMP; CYCLIC GMP; L-(CIS)-DILTIAZEM
chr2	100055102	100055102	T	-	exonic	REV1	REV1, DNA directed polymerase	stopgain	p.M392fs		0	0	0		ID=COSM1410296;OCCURENCE=3(NS),2(large_intestine)	.
chr2	100170848	100170848	C	T	exonic	AFF3	AF4/FMR2 family member 3	nonsynonymous SNV	p.V1187I	rs776241053	0	0	0	D	ID=COSM4083705;OCCURENCE=1(stomach)	.
chr2	101869786	101869800	CGCGGCGCAGCGCCT	-	exonic	CNOT11	CCR4-NOT transcription complex subunit 11	nonframeshift deletion	p.A121_L125del		0	0	0		ID=COSM5602986;OCCURENCE=1(skin)	.
chr2	102808507	102808507	G	A	exonic	IL1RL2	interleukin 1 receptor like 2	nonsynonymous SNV	p.G139E	rs868856349	0	0	0	D	ID=COSM4894211;OCCURENCE=1(skin)	.
chr2	103149137	103149137	A	-	exonic	SLC9A4	solute carrier family 9 member A4	frameshift deletion	p.K798fs	rs766495973	0	0	0		ID=COSM1398538;OCCURENCE=1(breast),2(NS),2(stomach),8(large_intestine)	.
chr2	105897026	105897026	G	A	exonic	TGFBRAP1	transforming growth factor beta receptor associated protein 1	nonsynonymous SNV	p.R426C	rs772376741	0	0	0	N	ID=COSM1229094;OCCURENCE=1(large_intestine)	.
chr2	107459920	107459920	G	A	exonic	ST6GAL2	ST6 beta-galactoside alpha-2,6-sialyltransferase 2	nonsynonymous SNV	p.R172W	rs767653102	0	0	0	N	ID=COSM4301464,COSM369298;OCCURENCE=1(lung),1(meninges),5(large_intestine)	.
chr2	109365546	109365546	C	T	exonic	RANBP2	RAN binding protein 2	stopgain	p.R412X		0	0	0		ID=COSM6454679;OCCURENCE=1(upper_aerodigestive_tract),1(large_intestine)	.
chr2	111691199	111691199	C	T	exonic	ACOXL	acyl-CoA oxidase like	nonsynonymous SNV	p.R347C	rs200635929	0	0	0	D	ID=COSM4658923,COSM4658922;OCCURENCE=2(large_intestine)	.
chr2	112940452	112940452	G	A	exonic	FBLN7	fibulin 7	nonsynonymous SNV	p.R252H	rs199894123	0	0	0	D	ID=COSM4084207;OCCURENCE=1(stomach)	.
chr2	112944997	112944997	G	A	exonic	FBLN7	fibulin 7	nonsynonymous SNV	p.V412I	rs201976044	0	0	0	N	ID=COSM6301238;OCCURENCE=1(liver)	.
chr2	118715997	118715997	G	C	exonic	CCDC93	coiled-coil domain containing 93	nonsynonymous SNV	p.R317G		0	0	0	N	ID=COSM213338;OCCURENCE=2(breast),1(prostate),1(large_intestine)	.
chr2	121107164	121107164	G	A	exonic	INHBB	inhibin beta B subunit	nonsynonymous SNV	p.R313H		0	0	0	N	ID=COSM6685885;OCCURENCE=1(large_intestine)	.
chr2	125521568	125521568	G	A	exonic	CNTNAP5	contactin associated protein like 5	nonsynonymous SNV	p.A792T		0	0	0	N	ID=COSM6631979;OCCURENCE=1(large_intestine)	.
chr2	133174763	133174763	G	A	exonic	GPR39	G protein-coupled receptor 39	nonsynonymous SNV	p.A50T		0	0	0	N	ID=COSM3115580;OCCURENCE=1(stomach)	.	ZN2+; COMPOUND 1 [PMID: 24900608]; COMPOUND 15 [PMID: 25313322]
chr2	136548389	136548389	G	A	exonic	LCT	lactase	nonsynonymous SNV	p.T1725M	rs1035870978	0	0	0	N	ID=COSM5005281;OCCURENCE=1(haematopoietic_and_lymphoid_tissue)	.	DMM
chr2	138414688	138414688	C	T	exonic	THSD7B	thrombospondin type 1 domain containing 7B	stopgain	p.R1448X		0	0	0		ID=COSM5956634,COSM5956633;OCCURENCE=1(haematopoietic_and_lymphoid_tissue)	.
chr2	141816481	141816481	C	T	exonic	LRP1B	LDL receptor related protein 1B	nonsynonymous SNV	p.R460Q		0	0	0	N	ID=COSM1399766;OCCURENCE=1(stomach),1(large_intestine)	.	Liposomal Doxorubicin; DOXORUBICIN
chr2	149248122	149248122	G	A	exonic	MBD5	methyl-CpG binding domain protein 5	nonsynonymous SNV	p.D1641N	rs780805788	0	0	0	D	ID=COSM6055984;OCCURENCE=1(upper_aerodigestive_tract)	.
chr2	152411488	152411488	G	A	exonic	NEB	nebulin	nonsynonymous SNV	p.P6462L	rs369054525	0	0	0	N	ID=COSM267014,COSM6308982,COSM267013;OCCURENCE=1(liver),1(large_intestine)	.
chr2	153504405	153504405	G	A	exonic	FMNL2	formin like 2	nonsynonymous SNV	p.E1089K	rs751231036	0	0	0	N	ID=COSM3425335;OCCURENCE=2(large_intestine)	.
chr2	155252622	155252622	C	T	exonic	GALNT13	polypeptide N-acetylgalactosaminyltransferase 13	nonsynonymous SNV	p.R426C	rs150203694	0	0	0	D	ID=COSM1400223,COSM3732914;OCCURENCE=1(stomach),1(large_intestine)	.
chr2	155555340	155555340	C	T	exonic	KCNJ3	potassium voltage-gated channel subfamily J member 3	nonsynonymous SNV	p.S18L		0	0	0	N	ID=COSM1691165;OCCURENCE=1(skin)	.	AZD2927; ML297; CLOZAPINE; FLUPIRTINE; BA2+; THYROTROPIN; NA+
chr2	158178064	158178064	C	T	exonic	ERMN	ermin	nonsynonymous SNV	p.D205N	rs766036566	0	0	0	D	ID=COSM3694921;OCCURENCE=1(stomach),1(large_intestine)	.
chr2	158182172	158182172	G	A	exonic	ERMN	ermin	nonsynonymous SNV	p.R8W		0	0	0		ID=COSM3568165;OCCURENCE=1(skin)	.
chr2	158974402	158974402	C	T	exonic	UPP2	uridine phosphorylase 2	nonsynonymous SNV	p.R193W	rs765912196	0	0	0	N	ID=COSM4994472,COSM4994473;OCCURENCE=1(haematopoietic_and_lymphoid_tissue)	.
chr2	162696337	162696337	G	A	exonic	SLC4A10	solute carrier family 4 member 10	nonsynonymous SNV	p.E106K	rs756835311	0	0	0	D	ID=COSM3310975,COSM3310974,COSM263726;OCCURENCE=1(large_intestine),1(central_nervous_system)	.
chr2	162820723	162820723	C	T	exonic	SLC4A10	solute carrier family 4 member 10	stopgain	p.R981X		0	0	0		ID=COSM1590779,COSM1008318;OCCURENCE=1(endometrium)	.
chr2	163230002	163230002	C	T	exonic	KCNH7	potassium voltage-gated channel subfamily H member 7	nonsynonymous SNV	p.R1101Q	rs770314357	0	0	0	N	ID=COSM4543026;OCCURENCE=3(skin)	.	TEDISAMIL; DALFAMPRIDINE; GUANIDINE HYDROCHLORIDE; NERISPIRDINE
chr2	165551753	165551753	G	A	exonic	COBLL1	cordon-bleu WH2 repeat protein like 1	nonsynonymous SNV	p.P822S		0	0	0	D	ID=COSM1494667;OCCURENCE=1(kidney)	.
chr2	166032778	166032778	T	C	exonic	SCN3A	sodium voltage-gated channel alpha subunit 3	nonsynonymous SNV	p.N43D		0	0	0	N	ID=COSM5937023,COSM5937022;OCCURENCE=1(skin)	.	DRONEDARONE HYDROCHLORIDE; ARTICAINE HYDROCHLORIDE; ZONISAMIDE; TETRACAINE HYDROCHLORIDE; LAMOTRIGINE; MERETHOXYLLINE PROCAINE; PRIMIDONE; ROPIVACAINE HYDROCHLORIDE; SAXITOXIN; TETRODOTOXIN; PHENYTOIN SODIUM; PROCAINAMIDE HYDROCHLORIDE; IRAMPANEL; MEXILETINE HYDROCHLORIDE; FOSPHENYTOIN SODIUM; AFT-II; PHENACEMIDE; CHLOROPROCAINE HYDROCHLORIDE; RUFINAMIDE; MORICIZINE HYDROCHLORIDE; TOCAINIDE HYDRO…
chr2	167055992	167055992	T	-	exonic	SCN9A	sodium voltage-gated channel alpha subunit 9	frameshift deletion	p.V1721fs	rs1027061303	0	0	0		ID=COSM1721352,COSM1721351;OCCURENCE=1(NS),1(skin)	.	PHENYTOIN; TOCAINIDE HYDROCHLORIDE; ETIDOCAINE HYDROCHLORIDE; RALFINAMIDE; RANOLAZINE; ESLICARBAZEPINE; LAMOTRIGINE; RANOLAZINE; XEN403; XEN402; PROPAFENONE HYDROCHLORIDE; LIDOCAINE; MORICIZINE HYDROCHLORIDE; MERETHOXYLLINE PROCAINE; PHENAZOPYRIDINE HYDROCHLORIDE; DYCLONINE HYDROCHLORIDE; AZD3161; PROPARACAINE HYDROCHLORIDE; OXCARBAZEPINE; BENOXINATE HYDROCHLORIDE; NERISPIRDINE; RUFINAMIDE; CARBA…
chr2	169985190	169985190	C	T	exonic	LRP2	LDL receptor related protein 2	nonsynonymous SNV	p.E4651K		0	0	0	N	ID=COSM4991609;OCCURENCE=1(skin)	.
chr2	170135967	170135967	C	T	exonic	LRP2	LDL receptor related protein 2	nonsynonymous SNV	p.V494I		0	0	0	D	ID=COSM5717052;OCCURENCE=3(skin)	.
chr2	170366962	170366962	G	A	exonic	KLHL41	kelch like family member 41	nonsynonymous SNV	p.R225H	rs374653463	0	0	0	D	ID=COSM4431691;OCCURENCE=1(oesophagus),1(large_intestine)	.
chr2	171687697	171687697	G	A	exonic	GAD1	glutamate decarboxylase 1	nonsynonymous SNV	p.R181H	rs141910612	0	0	0	N	ID=COSM269218,COSM4551866;OCCURENCE=1(pancreas),1(skin),1(large_intestine)	.
chr2	175677103	175677103	C	T	exonic	CHN1	chimerin 1	nonsynonymous SNV	p.V274M	rs373546784	0	0	0	N	ID=COSM1401383,COSM1401382;OCCURENCE=1(large_intestine)	.
chr2	179410298	179410298	G	A	exonic	TTN	titin	nonsynonymous SNV	p.R31847C	rs774814532	0	0	0	N	ID=COSM6813547,COSM6813545,COSM6813544,COSM6813548,COSM6813546;OCCURENCE=1(large_intestine)	.	PROTEASE INHIBITORS
chr2	179417446	179417446	C	T	exonic	TTN	titin	nonsynonymous SNV	p.V30061I	rs138958733	0	0	0	N	ID=COSM6813116,COSM6813112,COSM6813114,COSM6813115,COSM6813113;OCCURENCE=1(large_intestine)	.	PROTEASE INHIBITORS
chr2	179458173	179458173	C	A	exonic	TTN	titin	nonsynonymous SNV	p.V19588F		0	0	0	N	ID=COSM4605524,COSM4605526,COSM4605527,COSM4605528,COSM4605525;OCCURENCE=1(upper_aerodigestive_tract)	.	PROTEASE INHIBITORS
chr2	179466070	179466070	G	A	exonic	TTN	titin	nonsynonymous SNV	p.R18552C	rs763966394	0	0	0	N	ID=COSM3837768,COSM3837769,COSM3837766,COSM3837770,COSM3837767;OCCURENCE=1(breast)	.	PROTEASE INHIBITORS
chr2	179475959	179475959	A	T	exonic	TTN	titin	nonsynonymous SNV	p.V16966D		0	0	0	D	ID=COSM718090,COSM1148647,COSM718089,COSM718091,COSM718088;OCCURENCE=1(lung)	.	PROTEASE INHIBITORS
chr2	179478995	179478995	C	T	exonic	TTN	titin	nonsynonymous SNV	p.D16377N	rs757542062	0	0	0	N	ID=COSM3572498,COSM3572495,COSM3572494,COSM3572497,COSM3572496;OCCURENCE=2(skin)	.	PROTEASE INHIBITORS
chr2	179584152	179584152	G	T	exonic	TTN	titin	nonsynonymous SNV	p.R7989S		0	0	0	N	ID=COSM2706556,COSM2706555;OCCURENCE=1(liver),2(large_intestine)	.	PROTEASE INHIBITORS
chr2	179610806	179610806	G	A	exonic	TTN	titin	stopgain	p.R5441X	rs201273719	0	0	0		ID=COSM221667;OCCURENCE=2(skin)	.	PROTEASE INHIBITORS
chr2	179632509	179632509	G	A	exonic	TTN	titin	stopgain	p.R3150X	rs146572907	0	0	0		ID=COSM1012975,COSM1012973,COSM1012976,COSM1153654,COSM1012978,COSM1012977;OCCURENCE=1(endometrium)	.	PROTEASE INHIBITORS
chr2	180309692	180309692	G	A	exonic	ZNF385B	zinc finger protein 385B	stopgain	p.R370X	rs762602913	0	0	0		ID=COSM6456006,COSM6456007;OCCURENCE=1(upper_aerodigestive_tract)	.
chr2	182409488	182409488	C	T	exonic	CERKL	ceramide kinase like	nonsynonymous SNV	p.R461Q	rs148507801	0	0	0	N	ID=COSM274525,COSM3695141;OCCURENCE=2(large_intestine)	.
chr2	182781107	182781107	C	T	exonic	SSFA2	sperm specific antigen 2	stopgain	p.R914X		0	0	0		ID=COSM1013617,COSM1591454;OCCURENCE=1(lung),1(endometrium)	.
chr2	186670129	186670129	C	T	exonic	FSIP2	fibrous sheath interacting protein 2	nonsynonymous SNV	p.H5455Y	rs756701662	0	0	0	N	ID=COSM5928282,COSM5928281;OCCURENCE=1(skin)	.
chr2	189927956	189927956	G	A	exonic	COL5A2	collagen type V alpha 2 chain	nonsynonymous SNV	p.S604F		0	0	0	D	ID=COSM6444110;OCCURENCE=1(skin)	.	OCRIPLASMIN; COLLAGENASE CLOSTRIDIUM HISTOLYTICUM
chr2	192863893	192863893	G	A	exonic	TMEFF2	transmembrane protein with EGF like and two follistatin like domains 2	nonsynonymous SNV	p.P193L		0	0	0	N	ID=COSM5861397;OCCURENCE=1(NS)	.
chr2	196749416	196749416	G	A	exonic	DNAH7	dynein axonemal heavy chain 7	stopgain	p.R1886X	rs767696478	0	0	0		ID=COSM1014320;OCCURENCE=2(endometrium)	.
chr2	196849365	196849365	C	T	exonic	DNAH7	dynein axonemal heavy chain 7	nonsynonymous SNV	p.M608I		0	0	0	N	ID=COSM5603406;OCCURENCE=1(skin)	.
chr2	198267483	198267483	C	T	exonic	SF3B1	splicing factor 3b subunit 1	nonsynonymous SNV	p.R625H	rs1057519961	0	1	R625H	D	ID=COSM255276;OCCURENCE=4(haematopoietic_and_lymphoid_tissue),2(liver),4(skin),1(meninges),25(eye),1(central_nervous_system),1(biliary_tract)	.	N/A; Spliceostatin A; E7107
chr2	200213657	200213657	C	T	exonic	SATB2	SATB homeobox 2	nonsynonymous SNV	p.A314T		0	0	0	N	ID=COSM1014613;OCCURENCE=1(large_intestine),1(endometrium)	.
chr2	201478595	201478595	C	T	exonic	AOX1	aldehyde oxidase 1	nonsynonymous SNV	p.S506L	rs372254242	0	0	0	D	ID=COSM2906504;OCCURENCE=1(pancreas)	.	MENADIONE; ISOVANILLIN
chr2	202446916	202446916	G	A	exonic	C2CD6	C2 calcium dependent domain containing 6	nonsynonymous SNV	p.R181W	rs201483197	0	0	0	D	ID=COSM5497683,COSM5497681,COSM5497682;OCCURENCE=1(biliary_tract)	.
chr2	203922058	203922058	A	-	exonic	NBEAL1	neurobeachin like 1	frameshift deletion	p.E136fs	rs749661669	0	0	0		ID=COSM1404625;OCCURENCE=4(stomach),3(large_intestine),1(biliary_tract)	.
chr2	204304747	204304747	G	A	exonic	RAPH1	Ras association (RalGDS/AF-6) and pleckstrin homology domains 1	nonsynonymous SNV	p.R1108C	rs576908552	0	0	0	N	ID=COSM4154757;OCCURENCE=1(kidney)	.
chr2	207041526	207041526	C	T	exonic	GPR1	G protein-coupled receptor 1	nonsynonymous SNV	p.R149Q	rs1000101925	0	0	0	D	ID=COSM3909386;OCCURENCE=1(skin)	.	CHEMERIN C-TERMINAL PEPTIDE; CHEMERIN
chr2	207172439	207172439	G	A	exonic	ZDBF2	zinc finger DBF-type containing 2	nonsynonymous SNV	p.E1063K		0	0	0	N	ID=COSM3576720,COSM227710;OCCURENCE=1(NS),5(skin)	.
chr2	208988868	208988868	C	T	exonic	CRYGD	crystallin gamma D	nonsynonymous SNV	p.D74N		0	0	0	D	ID=COSM4090662;OCCURENCE=1(stomach)	.
chr2	209217385	209217385	C	T	exonic	PIKFYVE	phosphoinositide kinase, FYVE-type zinc finger containing	nonsynonymous SNV	p.T1908M	rs761036220	0	0	0	D	ID=COSM719516;OCCURENCE=1(liver),1(lung),1(large_intestine)	.
chr2	210574737	210574737	C	T	exonic	MAP2	microtubule associated protein 2	nonsynonymous SNV	p.S1611L		0	0	0	N	ID=COSM1148951,COSM719497;OCCURENCE=1(lung)	.	MELATONIN; COLCHICINE
chr2	210595033	210595033	C	T	exonic	MAP2	microtubule associated protein 2	nonsynonymous SNV	p.S1799L		0	0	0	N	ID=COSM3577017,COSM3577016;OCCURENCE=1(skin)	.	MELATONIN; COLCHICINE
chr2	210703978	210703978	G	A	exonic	UNC80	unc-80 homolog, NALCN channel complex subunit	nonsynonymous SNV	p.R1025Q		0	0	0	N	ID=COSM4541810;OCCURENCE=1(skin)	.
chr2	211336701	211336701	C	T	exonic	LANCL1	LanC like 1	nonsynonymous SNV	p.G61S	rs139516654	0	0	0	N	ID=COSM6046836;OCCURENCE=1(large_intestine)	.
chr2	211457633	211457633	G	A	exonic	CPS1	carbamoyl-phosphate synthase 1	nonsynonymous SNV	p.A379T		0	0	0	N	ID=COSM5418648,COSM5418647;OCCURENCE=1(haematopoietic_and_lymphoid_tissue)	.	CARGLUMIC ACID; CARGLUMIC ACID
chr2	211507259	211507259	G	A	exonic	CPS1	carbamoyl-phosphate synthase 1	nonsynonymous SNV	p.R1010H	rs765418878	0	0	0	D	ID=COSM5421636,COSM5421635;OCCURENCE=1(prostate)	.	CARGLUMIC ACID; CARGLUMIC ACID
chr2	218678019	218678019	G	T	exonic	TNS1	tensin 1	nonsynonymous SNV	p.H1521N		0	0	0	N	ID=COSM6251018;OCCURENCE=1(liver)	.
chr2	219508604	219508604	G	A	exonic	ZNF142	zinc finger protein 142	nonsynonymous SNV	p.R879C	rs754686597	0	0	0	N	ID=COSM1016432,COSM1016433;OCCURENCE=1(large_intestine),1(endometrium)	.
chr2	219611790	219611790	G	A	exonic	TTLL4	tubulin tyrosine ligase like 4	nonsynonymous SNV	p.R680H	rs771106138	0	0	0	D	ID=COSM6811537;OCCURENCE=1(large_intestine)	.
chr2	220047101	220047101	C	-	exonic	RETREG2	reticulophagy regulator family member 2	frameshift deletion	p.S463fs		0	0	0		ID=COSM6658459;OCCURENCE=1(large_intestine)	.
chr2	220338490	220338490	G	A	exonic	SPEG	SPEG complex locus	nonsynonymous SNV	p.E1438K		0	0	0	N	ID=COSM3578004;OCCURENCE=1(skin)	.
chr2	220439988	220439988	G	A	exonic	INHA	inhibin alpha subunit	nonsynonymous SNV	p.V281M		0	0	0	D	ID=COSM3838687;OCCURENCE=1(breast)	.	ANTISERUM
chr2	228563991	228563991	G	A	exonic	SLC19A3	solute carrier family 19 member 3	nonsynonymous SNV	p.T147M		0	0	0	D	ID=COSM4726623;OCCURENCE=1(large_intestine)	.	[3H]THIAMINE
chr2	231331852	231331852	G	A	exonic	SP100	SP100 nuclear antigen	nonsynonymous SNV	p.D405N	rs776688849	0	0	0	D	ID=COSM6787668,COSM6787666,COSM6787667;OCCURENCE=1(large_intestine)	.
chr2	231944287	231944287	G	A	exonic	PSMD1	proteasome 26S subunit, non-ATPase 1	nonsynonymous SNV	p.A400T	rs867752533	0	0	0	N	ID=COSM6371604;OCCURENCE=1(thyroid)	.	OPROZOMIB; BORTEZOMIB; CARFILZOMIB; OPROZOMIB; BORTEZOMIB; BORTEZOMIB; MLN-9708; CARFILZOMIB; BORTEZOMIB; IXAZOMIB CITRATE
chr2	232262774	232262774	G	A	exonic	B3GNT7	UDP-GlcNAc:betaGal beta-1,3-N-acetylglucosaminyltransferase 7	nonsynonymous SNV	p.R115H		0	0	0	D	ID=COSM5509884;OCCURENCE=1(biliary_tract)	.
chr2	233322526	233322526	C	T	exonic	ALPI	alkaline phosphatase, intestinal	nonsynonymous SNV	p.R269C	rs750269899	0	0	0	D	ID=COSM3049257;OCCURENCE=1(large_intestine)	.
chr2	233349183	233349183	G	A	exonic	ECEL1	endothelin converting enzyme like 1	nonsynonymous SNV	p.R395W		0	0	0	D	ID=COSM5862009;OCCURENCE=1(NS)	.
chr2	234394237	234394237	T	-	exonic	USP40	ubiquitin specific peptidase 40	frameshift deletion	p.K1159fs	rs766340074	0	0	0		ID=COSM1406369,COSM1406370;OCCURENCE=1(stomach),11(large_intestine),1(biliary_tract)	.
chr2	237490163	237490163	C	T	exonic	ACKR3	atypical chemokine receptor 3	nonsynonymous SNV	p.T352M	rs777382973	0	0	0	N	ID=COSM1018319;OCCURENCE=2(large_intestine),1(endometrium)	.	CXCL11; TC14012; PLERIXAFOR; CXCL12α
chr2	238249127	238249127	C	T	exonic	COL6A3	collagen type VI alpha 3 chain	nonsynonymous SNV	p.R2811H	rs769656291	0	0	0	D	ID=COSM343307;OCCURENCE=1(lung),1(large_intestine)	.	COLLAGENASE CLOSTRIDIUM HISTOLYTICUM; OCRIPLASMIN
chr2	239006901	239006901	C	T	exonic	SCLY	selenocysteine lyase	nonsynonymous SNV	p.R423W	rs367625492	0	0	0	D	ID=COSM3771829;OCCURENCE=1(pancreas)	.
chr2	239025586	239025586	C	T	exonic	ESPNL	espin like	nonsynonymous SNV	p.R300W	rs749310509	0	0	0	D	ID=COSM1018513;OCCURENCE=1(endometrium)	.
chr2	239237907	239237907	G	A	exonic	TRAF3IP1	TRAF3 interacting protein 1	nonsynonymous SNV	p.R280Q		0	0	0	N	ID=COSM1018582;OCCURENCE=1(endometrium)	.
chr2	241631398	241631398	G	A	exonic	AQP12A	aquaporin 12A	nonsynonymous SNV	p.R23Q	rs149487583	0	0	0	N	ID=COSM266021;OCCURENCE=1(upper_aerodigestive_tract),1(large_intestine),1(central_nervous_system)	.
chr2	241722504	241722504	G	A	exonic	KIF1A	kinesin family member 1A	nonsynonymous SNV	p.S274L	rs797045655	0	0	0	D	ID=COSM6497827,COSM6497826;OCCURENCE=1(oesophagus)	.
chr20	68408	68408	G	A	exonic	DEFB125	defensin beta 125	nonsynonymous SNV	p.G20S		0	0	0	N	ID=COSM4553419;OCCURENCE=1(skin)	.
chr20	139420	139420	G	A	exonic	DEFB127	defensin beta 127	nonsynonymous SNV	p.E19K	rs377550443	0	0	0	N	ID=COSM1024632;OCCURENCE=1(endometrium)	.
chr20	1286555	1286555	C	T	exonic	SNPH	syntaphilin	nonsynonymous SNV	p.R492W	rs749027780	0	0	0	D	ID=COSM3991548,COSM3991549;OCCURENCE=1(kidney)	.
chr20	1552399	1552399	G	A	exonic	SIRPB1	signal regulatory protein beta 1	nonsynonymous SNV	p.R240C	rs142083473	0	0	0	N	ID=COSM3910893,COSM263665;OCCURENCE=1(skin),1(large_intestine)	.
chr20	2397884	2397884	G	A	exonic	TGM6	transglutaminase 6	nonsynonymous SNV	p.R448Q	rs777834583	0	0	0	N	ID=COSM4581681;OCCURENCE=1(bone)	.
chr20	2635484	2635484	C	T	exonic	NOP56	NOP56 ribonucleoprotein	nonsynonymous SNV	p.R154C		0	0	0	D	ID=COSM1025424;OCCURENCE=1(endometrium)	.
chr20	3520891	3520891	C	T	exonic	ATRN	attractin	nonsynonymous SNV	p.R173C	rs758948800	0	0	0	N	ID=COSM6608511,COSM178711;OCCURENCE=1(skin),3(large_intestine),1(endometrium)	.
chr20	4229457	4229457	C	A	exonic	ADRA1D	adrenoceptor alpha 1D	nonsynonymous SNV	p.A50S		0	0	0	N	ID=COSM5665138;OCCURENCE=1(lung)	.	DEBRISOQUIN; PROPIOMAZINE; SERTINDOLE; DOXAZOSIN; ALFUZOSIN; EPINEPHRINE; DOXAZOSIN; NOREPINEPHRINE; DEBRISOQUIN; BETHANIDINE; METHOTRIMEPRAZINE; PAPAVERINE; NOREPINEPHRINE; METHOTRIMEPRAZINE; TERAZOSIN; DAPIPRAZOLE; PROMAZINE; METOPROLOL SUCCINATE; TAMSULOSIN; CYPROTERONE ACETATE; PRAZOSIN; SOU-001; TAMSULOSIN; PRAZOSIN; SERTINDOLE; PHENYLEPHRINE; TERAZOSIN; PROMAZINE; DOXAZOSIN; ALFUZOSIN; ALFU…
chr20	7886921	7886921	C	A	exonic	HAO1	hydroxyacid oxidase 1	nonsynonymous SNV	p.D201Y		0	0	0	N	ID=COSM724689;OCCURENCE=2(liver),1(lung)	.
chr20	10280034	10280034	C	T	exonic	SNAP25	synaptosome associated protein 25	nonsynonymous SNV	p.R176C		0	0	0	D	ID=COSM1024386,COSM1024387;OCCURENCE=1(stomach),1(skin),1(endometrium)	.	BOTULINUM TOXIN TYPE A; BOTULINUM TOXIN TYPE A; INCOBOTULINUMTOXINA; BOTULINUM TOXIN TYPE A PURIFIED NEUROTOXIN COMPLEX; BOTULINUM TOXIN TYPE A; STEROID HORMONE; ABOBOTULINUMTOXINA; DIAZOXIDE
chr20	14307246	14307246	G	A	exonic	FLRT3	fibronectin leucine rich transmembrane protein 3	nonsynonymous SNV	p.R303C	rs150799973	0	0	0	N	ID=COSM281192;OCCURENCE=1(skin),1(large_intestine)	.
chr20	23016841	23016841	G	A	exonic	SSTR4	somatostatin receptor 4	nonsynonymous SNV	p.V241M	rs759400529	0	0	0	N	ID=COSM2705980;OCCURENCE=1(kidney)	.	KE 108; BIM 23052; H-C[CYS-PHE-LAGL(NβME,BENZOYL)-TRP-LYS-THR-PHE-CYS]-OH; β3-TETRAPEPTIDE; [125I]TYR10-CST14; DES-AA5-[D-TRP8]SRIF; CGP 23996; [125I]LTT-SRIF-28; NNC269100; BIM 23295; L-362,855; H-C[DCYS-PHE-LAGL(NβME,BENZOYL)-DTRP-LYS-THR-PHE-CYS]-OH; BIM 23454; OCTREOTIDE ACETATE; CST-17; CORTISTATIN-14; BIM 23627; PRL-2915; [125I]CGP 23996; [D-TYR8]CYN 154806; H-C[CYS-PHE-LAGL(NβME,BENZOYL)-D…
chr20	23804713	23804713	C	T	exonic	CST2	cystatin SA	nonsynonymous SNV	p.E124K	rs372139444	0	0	0	N	ID=COSM1025252;OCCURENCE=1(endometrium)	.
chr20	29965096	29965096	C	T	exonic	DEFB119	defensin beta 119	nonsynonymous SNV	p.E70K		0	0	0	N	ID=COSM2888345;OCCURENCE=2(skin)	.
chr20	30414655	30414655	G	A	exonic	MYLK2	myosin light chain kinase 2	nonsynonymous SNV	p.E380K		0	0	0	D	ID=COSM4904850;OCCURENCE=1(skin)	.	CALMODULIN; GSK2606414
chr20	30432595	30432595	G	A	exonic	FOXS1	forkhead box S1	nonsynonymous SNV	p.R251W	rs773930926	0	0	0	D	ID=COSM5507229;OCCURENCE=1(pancreas),1(biliary_tract)	.	IL-3
chr20	30898719	30898719	G	A	exonic	KIF3B	kinesin family member 3B	nonsynonymous SNV	p.R380Q	rs750822805	0	0	0	D	ID=COSM6695507;OCCURENCE=1(large_intestine)	.
chr20	32873409	32873409	C	T	exonic	AHCY	adenosylhomocysteinase	nonsynonymous SNV	p.R335H	rs867752341	0	0	0	N	ID=COSM2757973;OCCURENCE=1(large_intestine)	.	3-DEAZAADENOSINE
chr20	33345500	33345500	C	T	exonic	NCOA6	nuclear receptor coactivator 6	nonsynonymous SNV	p.G351S	rs751187935	0	0	0	N	ID=COSM1411327;OCCURENCE=1(large_intestine)	.
chr20	34060622	34060622	G	A	exonic	CEP250	centrosomal protein 250	nonsynonymous SNV	p.R392H	rs200471436	0	0	0	N	ID=COSM3707724;OCCURENCE=2(liver),1(thyroid),1(large_intestine)	.
chr20	34241428	34241428	C	T	exonic	RBM12	RNA binding motif protein 12	nonsynonymous SNV	p.R606H	rs766897862	0	0	0	N	ID=COSM2759161;OCCURENCE=4(large_intestine)	.
chr20	36953197	36953197	C	T	exonic	BPI	bactericidal/permeability-increasing protein	stopgain	p.R323X	rs150749170	0	0	0		ID=COSM1026639;OCCURENCE=2(skin),1(central_nervous_system),1(endometrium)	.
chr20	41100999	41100999	G	A	exonic	PTPRT	protein tyrosine phosphatase, receptor type T	nonsynonymous SNV	p.R453C		0	0	0	N	ID=COSM3405089,COSM3405088;OCCURENCE=1(central_nervous_system)	.
chr20	42338659	42338659	C	T	exonic	MYBL2	MYB proto-oncogene like 2	nonsynonymous SNV	p.P521L		0	0	0	D	ID=COSM3546738;OCCURENCE=1(skin)	.
chr20	42966018	42966018	G	A	exonic	R3HDML	R3H domain containing like	nonsynonymous SNV	p.R74Q	rs777264582	0	0	0	D	ID=COSM443864;OCCURENCE=1(breast)	.
chr20	43804672	43804672	G	A	exonic	PI3	peptidase inhibitor 3	nonsynonymous SNV	p.A84T	rs780306943	0	0	0	D	ID=COSM443884;OCCURENCE=1(breast),2(stomach),1(prostate)	.	PROGESTERONE
chr20	43836056	43836056	C	T	exonic	SEMG1	semenogelin I	nonsynonymous SNV	p.P40S		0	0	0	N	ID=COSM724478;OCCURENCE=1(skin),1(lung)	.
chr20	43926908	43926908	C	T	exonic	MATN4	matrilin 4	nonsynonymous SNV	p.R484Q		0	0	0	D	ID=COSM4098795,COSM4098794;OCCURENCE=1(stomach)	.
chr20	44507046	44507046	G	A	exonic	ZSWIM3	zinc finger SWIM-type containing 3	nonsynonymous SNV	p.D617N	rs781249493	0	0	0	N	ID=COSM3841142,COSM3841141;OCCURENCE=1(breast)	.
chr20	44639205	44639205	C	T	exonic	MMP9	matrix metallopeptidase 9	nonsynonymous SNV	p.T152M		0	0	0	D	ID=COSM270949;OCCURENCE=1(large_intestine)	.	ANDECALIXIMAB; MARIMASTAT; PG-116800; NEOVASTAT; COMPOUND 29E [PMID: 23631440]; CGS-27023A; PRINOMASTAT; ANDECALIXIMAB; S-3304; BEVACIZUMAB; SB-3CT; ILOMASTAT; COL-3; AZD6605; AZD1236; SL422; TST10088; MARIMASTAT; AE-941; COMPOUND 1A [PMID: 15055993]
chr20	44828101	44828101	C	T	exonic	CDH22	cadherin 22	nonsynonymous SNV	p.A462T		0	0	0	N	ID=COSM5858003;OCCURENCE=1(NS)	.
chr20	44845579	44845579	C	T	exonic	CDH22	cadherin 22	nonsynonymous SNV	p.E242K		0	0	0	N	ID=COSM4557343;OCCURENCE=1(skin),2(large_intestine)	.
chr20	45875231	45875231	G	A	exonic	ZMYND8	zinc finger MYND-type containing 8	nonsynonymous SNV	p.T609M	rs773983281	0	0	0	D	ID=COSM1190278;OCCURENCE=1(lung)	.
chr20	47253137	47253137	G	A	exonic	PREX1	phosphatidylinositol-3,4,5-trisphosphate dependent Rac exchange factor 1	nonsynonymous SNV	p.A1344V	rs374959294	0	0	0	N	ID=COSM4099128,COSM4099127;OCCURENCE=1(bone),1(stomach)	.
chr20	47589723	47589723	G	T	exonic	ARFGEF2	ADP ribosylation factor guanine nucleotide exchange factor 2	nonsynonymous SNV	p.D523Y		0	0	0	D	ID=COSM6558865;OCCURENCE=1(lung)	.
chr20	47991220	47991220	G	A	exonic	KCNB1	potassium voltage-gated channel subfamily B member 1	nonsynonymous SNV	p.R293C		0	0	0	D	ID=COSM1130609;OCCURENCE=1(stomach),1(skin),1(prostate),1(large_intestine)	.	RY796; 3-BICYCLO[2.2.1]HEPT-2-YL-BENZENE-1,2-DIOL; LINOLEIC ACID; TEDISAMIL; GUANIDINE HYDROCHLORIDE; DALFAMPRIDINE; NERISPIRDINE; GXTX-1E
chr20	48330163	48330165	AAG	-	exonic	B4GALT5	beta-1,4-galactosyltransferase 5	nonframeshift deletion	p.F22del	rs755129382	0	0	0		ID=COSM2762265;OCCURENCE=1(pancreas)	.
chr20	49626346	49626346	G	A	exonic	KCNG1	potassium voltage-gated channel modifier subfamily G member 1	nonsynonymous SNV	p.A177V		0	0	0	N	ID=COSM4854688,COSM459728;OCCURENCE=1(cervix)	.	TEDISAMIL; GUANIDINE HYDROCHLORIDE; NERISPIRDINE; DALFAMPRIDINE
chr20	49626407	49626407	C	T	exonic	KCNG1	potassium voltage-gated channel modifier subfamily G member 1	nonsynonymous SNV	p.A157T	rs944101242	0	0	0	N	ID=COSM4099380,COSM4099381;OCCURENCE=1(stomach)	.	TEDISAMIL; GUANIDINE HYDROCHLORIDE; NERISPIRDINE; DALFAMPRIDINE
chr20	50140209	50140209	C	T	exonic	NFATC2	nuclear factor of activated T-cells 2	nonsynonymous SNV	p.V191I		0	0	0	N	ID=COSM4784027,COSM1412460,COSM5166998;OCCURENCE=1(large_intestine)	.
chr20	50401201	50401201	G	A	exonic	SALL4	spalt like transcription factor 4	nonsynonymous SNV	p.A922V	rs755288586	0	0	0	N	ID=COSM271696;OCCURENCE=1(large_intestine),1(central_nervous_system)	.
chr20	54579035	54579035	G	A	exonic	CBLN4	cerebellin 4 precursor	nonsynonymous SNV	p.R65W		0	0	0	D	ID=COSM6620958;OCCURENCE=1(large_intestine)	.
chr20	55020996	55020996	C	T	exonic	CASS4	Cas scaffolding protein family member 4	nonsynonymous SNV	p.P167L	rs778711376	0	0	0	N	ID=COSM1247379;OCCURENCE=1(stomach)	.
chr20	57564011	57564011	C	T	exonic	NELFCD	negative elongation factor complex member C/D	nonsynonymous SNV	p.R165W	rs760586283	0	0	0	D	ID=COSM1028520;OCCURENCE=1(endometrium)	.
chr20	57599408	57599408	G	A	exonic	TUBB1	tubulin beta 1 class VI	nonsynonymous SNV	p.R309H	rs776524370	0	0	0	D	ID=COSM1028548;OCCURENCE=1(endometrium)	.	PACLITAXEL; TRASTUZUMAB EMTANSINE; CABAZITAXEL; ANG1005; IXABEPILONE; ERIBULIN MESYLATE; OMBRABULIN; VINCRISTINE SULFATE; TASIDOTIN; 2-METHOXYESTRADIOL; CABAZITAXEL; VERUBULIN; CROLIBULIN; SAGOPILONE; VINDESINE; ALBENDAZOLE; MILATAXEL; VINBLASTINE SULFATE; BRENTUXIMAB VEDOTIN; PACLITAXEL; TASIDOTIN HYDROCHLORIDE; PACLITAXEL POLIGLUMEX; MEBENDAZOLE; FOSBRETABULIN TROMETHAMINE; FOSBRETABULIN DISODI…
chr20	57766220	57766220	C	-	exonic	ZNF831	zinc finger protein 831	frameshift deletion	p.T52fs	rs756006516	0	0	0		ID=COSM1180921;OCCURENCE=1(stomach),1(pancreas),16(large_intestine)	.
chr20	57767447	57767447	C	T	exonic	ZNF831	zinc finger protein 831	nonsynonymous SNV	p.A458V		0	0	0	N	ID=COSM4427826;OCCURENCE=1(oesophagus),1(large_intestine)	.
chr20	57769140	57769140	G	-	exonic	ZNF831	zinc finger protein 831	frameshift deletion	p.D1025fs		0	0	0		ID=COSM4612538;OCCURENCE=2(stomach),1(large_intestine)	.
chr20	58330363	58330363	C	T	exonic	PHACTR3	phosphatase and actin regulator 3	nonsynonymous SNV	p.T162M	rs145693547	0	0	0	N	ID=COSM724986;OCCURENCE=1(lung)	.
chr20	58452518	58452518	-	T	exonic	SYCP2	synaptonemal complex protein 2	frameshift insertion	p.N1024fs	rs779794621	0	0	0		ID=COSM5081378;OCCURENCE=3(NS),1(liver)	.
chr20	58467047	58467047	T	-	exonic	SYCP2	synaptonemal complex protein 2	stopgain	p.M788fs	rs751916442	0	0	0		ID=COSM253106;OCCURENCE=1(ovary),2(NS),2(stomach),1(pancreas),6(large_intestine)	.
chr20	60747785	60747785	G	A	exonic	SS18L1	SS18L1, nBAF chromatin remodeling complex subunit	nonsynonymous SNV	p.A325T	rs142989416	0	0	0	N	ID=COSM5858257,COSM5858256;OCCURENCE=1(NS)	.
chr20	60831247	60831247	G	A	exonic	OSBPL2	oxysterol binding protein like 2	nonsynonymous SNV	p.G3R	rs746311450	0	0	0	N	ID=COSM2153383;OCCURENCE=1(large_intestine),2(central_nervous_system)	.
chr20	61527997	61527997	G	A	exonic	DIDO1	death inducer-obliterator 1	nonsynonymous SNV	p.P647L		0	0	0	N	ID=COSM3963763,COSM3963764;OCCURENCE=1(lung)	.
chr20	61834034	61834034	G	A	exonic	YTHDF1	YTH N6-methyladenosine RNA binding protein 1	nonsynonymous SNV	p.R420C		0	0	0	D	ID=COSM5434423;OCCURENCE=1(oesophagus)	.
chr20	61867627	61867627	G	A	exonic	BIRC7	baculoviral IAP repeat containing 7	nonsynonymous SNV	p.R60Q	rs778417811	0	0	0	N	ID=COSM5460878;OCCURENCE=1(large_intestine)	.	AT-406; CISPLATIN; GDC-0152
chr20	62038586	62038586	C	T	exonic	KCNQ2	potassium voltage-gated channel subfamily Q member 2	nonsynonymous SNV	p.R685Q		0	0	0	D	ID=COSM3548988,COSM3548989,COSM3548987;OCCURENCE=1(skin)	.	NERISPIRDINE; FLINDOKALNER; RETIGABINE; ICA-105665; DALFAMPRIDINE; EZOGABINE; GUANIDINE HYDROCHLORIDE; TEDISAMIL
chr21	10920092	10920092	G	A	exonic	TPTE	transmembrane phosphatase with tensin homology	nonsynonymous SNV	p.P388S		0	0	0	D	ID=COSM1713825,COSM1713824;OCCURENCE=2(skin)	.
chr21	15882735	15882735	G	A	exonic	SAMSN1	SAM domain, SH3 domain and nuclear localization signals 1	stopgain	p.R221X	rs756895183	0	0	0		ID=COSM1720325,COSM1720324;OCCURENCE=8(skin)	.
chr21	22710798	22710798	C	T	exonic	NCAM2	neural cell adhesion molecule 2	nonsynonymous SNV	p.P330S		0	0	0	D	ID=COSM4398695;OCCURENCE=2(skin)	.
chr21	30414797	30414797	C	T	exonic	USP16	ubiquitin specific peptidase 16	nonsynonymous SNV	p.S376F		0	0	0	N	ID=COSM3550049;OCCURENCE=1(skin)	.
chr21	31588020	31588020	G	A	exonic	CLDN8	claudin 8	nonsynonymous SNV	p.P75L		0	0	0	D	ID=COSM6630049;OCCURENCE=1(large_intestine)	.
chr21	31709701	31709701	C	T	exonic	KRTAP27-1	keratin associated protein 27-1	nonsynonymous SNV	p.E96K		0	0	0	N	ID=COSM1413612;OCCURENCE=6(large_intestine)	.
chr21	31797833	31797833	C	A	exonic	KRTAP13-3	keratin associated protein 13-3	nonsynonymous SNV	p.R133I	rs746804941	0	0	0	N	ID=COSM5794382;OCCURENCE=1(breast)	.
chr21	32007650	32007650	G	T	exonic	KRTAP20-2	keratin associated protein 20-2	nonsynonymous SNV	p.G23V		0	0	0	N	ID=COSM5677829;OCCURENCE=1(lung)	.
chr21	33331183	33331183	G	A	exonic	HUNK	hormonally up-regulated Neu-associated kinase	nonsynonymous SNV	p.G259R		0	0	0	D	ID=COSM3550257;OCCURENCE=1(skin)	.
chr21	33744931	33744931	C	T	exonic	URB1	URB1 ribosome biogenesis 1 homolog (S. cerevisiae)	nonsynonymous SNV	p.E296K	rs766888968	0	0	0	N	ID=COSM1231875,COSM1231874;OCCURENCE=1(stomach),1(large_intestine)	.
chr21	34922573	34922573	G	A	exonic	SON	SON DNA binding protein	nonsynonymous SNV	p.V346I	rs772189559	0	0	0	N	ID=COSM6874991,COSM6874989,COSM6874990;OCCURENCE=1(skin)	.
chr21	35254658	35254658	G	A	exonic	ITSN1	intersectin 1	nonsynonymous SNV	p.D1485N		0	0	0	D	ID=COSM300378;OCCURENCE=1(large_intestine)	.
chr21	39086559	39086559	C	T	exonic	KCNJ6	potassium voltage-gated channel subfamily J member 6	nonsynonymous SNV	p.E301K		0	0	0	D	ID=COSM3912085;OCCURENCE=1(skin)	.	FLUPIRTINE; NA+; SCH-23390
chr21	40608651	40608651	G	A	exonic	BRWD1	bromodomain and WD repeat domain containing 1	nonsynonymous SNV	p.P879L		0	0	0	D	ID=COSM4805973,COSM4805972;OCCURENCE=2(liver)	.
chr21	40619680	40619680	G	A	exonic	BRWD1	bromodomain and WD repeat domain containing 1	nonsynonymous SNV	p.R810C	rs140156148	0	0	0	N	ID=COSM5981769,COSM5981768;OCCURENCE=1(upper_aerodigestive_tract)	.
chr21	42551432	42551432	T	-	exonic	PLAC4	placenta specific 4	frameshift deletion	p.R42fs		0	0	0		ID=COSM5858643;OCCURENCE=1(NS),1(haematopoietic_and_lymphoid_tissue)	.
chr21	44188352	44188352	G	A	exonic	PDE9A	phosphodiesterase 9A	nonsynonymous SNV	p.E471K		0	0	0	D	ID=COSM3551205;OCCURENCE=1(skin)	.	PENTOXIFYLLINE; ZAPRINAST; SCH51866; DIPYRIDAMOLE
chr21	44513298	44513298	C	T	exonic	U2AF1;U2AF1L5	U2 small nuclear RNA auxiliary factor 1,U2 small nuclear RNA auxiliary factor 1 like 5	nonsynonymous SNV	p.G213S	rs761520409	0	0	0	N	ID=COSM6814731,COSM6814730;OCCURENCE=1(large_intestine)	.
chr21	44949728	44949728	C	T	exonic	HSF2BP	heat shock transcription factor 2 binding protein	nonsynonymous SNV	p.R304H	rs145814386	0	0	0	N	ID=COSM2820205;OCCURENCE=2(large_intestine)	.
chr21	45546795	45546795	C	T	exonic	PWP2	PWP2, small subunit processome component	nonsynonymous SNV	p.R697W	rs138442552	0	0	0	D	ID=COSM4101906;OCCURENCE=1(stomach),1(lung)	.
chr21	45993777	45993777	G	A	exonic	KRTAP10-4	keratin associated protein 10-4	nonsynonymous SNV	p.A48T	rs201736033	0	0	0	N	ID=COSM3405458;OCCURENCE=1(central_nervous_system)	.
chr21	47360109	47360109	G	A	exonic	PCBP3	poly(rC) binding protein 3	nonsynonymous SNV	p.A359T	rs368056368	0	0	0	N	ID=COSM4711446,COSM4711445;OCCURENCE=2(large_intestine),1(biliary_tract)	.
chr21	47754524	47754524	G	A	exonic	PCNT	pericentrin	nonsynonymous SNV	p.V161I	rs555841008	0	0	0	N	ID=COSM6205844;OCCURENCE=1(haematopoietic_and_lymphoid_tissue)	.
chr22	17073056	17073056	G	A	exonic	CCT8L2	chaperonin containing TCP1 subunit 8 like 2	nonsynonymous SNV	p.R129C		0	0	0	N	ID=COSM1031811;OCCURENCE=1(endometrium)	.
chr22	18384733	18384733	C	T	exonic	MICAL3	microtubule associated monooxygenase, calponin and LIM domain containing 3	nonsynonymous SNV	p.R201Q	rs375846761	0	0	0	N	ID=COSM245685,COSM245687,COSM245686;OCCURENCE=1(prostate)	.
chr22	18909893	18909893	C	T	exonic	PRODH	proline dehydrogenase 1	nonsynonymous SNV	p.A292T	rs756716648	0	0	0	D	ID=COSM5471416;OCCURENCE=2(large_intestine)	.
chr22	19754386	19754386	G	T	exonic	TBX1	T-box 1	nonsynonymous SNV	p.R495I		0	0	0	D	ID=COSM164825;OCCURENCE=1(breast)	.
chr22	19951735	19951737	GAA	-	exonic	COMT	catechol-O-methyltransferase	nonframeshift deletion	p.K179del	rs773751730	0	0	0		ID=COSM1032160;OCCURENCE=1(endometrium)	.	TOLCAPONE; ENTACAPONE; ENTACAPONE; TOLCAPONE; TOLCAPONE; TOLCAPONE; TOLCAPONE; OPICAPONE; ENTACAPONE; ENTACAPONE; ENTACAPONE+LEVODOPA+CARBIDOPA; ENTACAPONE
chr22	23922260	23922260	G	A	exonic	IGLL1	immunoglobulin lambda like polypeptide 1	nonsynonymous SNV	p.R40C	rs199529532	0	0	0	N	ID=COSM6684451;OCCURENCE=1(large_intestine)	.
chr22	24086754	24086754	C	T	exonic	ZNF70	zinc finger protein 70	nonsynonymous SNV	p.G192R	rs141104976	0	0	0	N	ID=COSM1032599;OCCURENCE=1(endometrium)	.
chr22	24176338	24176338	C	T	exonic	SMARCB1	SWI/SNF related, matrix associated, actin dependent regulator of chromatin, subfamily b, member 1	nonsynonymous SNV	p.R386C		1	0	R377C	D	ID=COSM3972885,COSM3972886;OCCURENCE=1(haematopoietic_and_lymphoid_tissue),1(lung),2(large_intestine),1(central_nervous_system)	CDK inhibitors, Vismodegib, Hedgehog inhibitors, HDAC inhibitors	radiotherapy; EPZ-6438; Alvocidib; Tazemetostat; DZNeP; Vorinostat; PANOBINOSTAT; Fenretinide; Palbociclib; CFI-400945
chr22	26231368	26231368	C	T	exonic	MYO18B	myosin XVIIIB	nonsynonymous SNV	p.R1057C	rs552342374	0	0	0	D	ID=COSM4582267;OCCURENCE=1(bone)	.
chr22	26423573	26423573	C	T	exonic	MYO18B	myosin XVIIIB	nonsynonymous SNV	p.R2546W	rs765816753	0	0	0	N	ID=COSM2935360;OCCURENCE=1(biliary_tract)	.
chr22	28193261	28193261	C	T	exonic	MN1	MN1 proto-oncogene, transcriptional regulator	nonsynonymous SNV	p.A1091T		0	0	0	N	ID=COSM1215314;OCCURENCE=1(large_intestine)	.
chr22	28503957	28503957	C	T	exonic	TTC28	tetratricopeptide repeat domain 28	nonsynonymous SNV	p.D626N	rs558244181	0	0	0	N	ID=COSM4618182;OCCURENCE=1(large_intestine)	.
chr22	29885313	29885313	C	G	exonic	NEFH	neurofilament heavy	nonsynonymous SNV	p.P562A	rs530872313	0	0	0	N	ID=COSM4706351;OCCURENCE=2(NS),1(liver),2(large_intestine)	.
chr22	30070850	30070850	C	T	exonic	NF2	neurofibromin 2	stopgain	p.Q456X		1	0	0	N	ID=COSM22211,COSM5611691;OCCURENCE=1(soft_tissue),1(adrenal_gland),2(meninges)	PI3K/AKT/MTOR inhibitors	SELUMETINIB (AZD6244); Imatinib; Bevacizumab; Lapatinib; TEMSIROLIMUS; Cetuximab; Erlotinib; Tensirolimus; EVEROLIMUS; Octreotide; CARBOPLATIN; CISPLATIN; Everolimus; AR42; Chemotherapy
chr22	32011159	32011159	C	G	exonic	SFI1	SFI1 centrin binding protein	stopgain	p.S1065X		0	0	0		ID=COSM4487472;OCCURENCE=1(skin)	.
chr22	32937657	32937657	C	T	exonic	SYN3	synapsin III	nonsynonymous SNV	p.V273M	rs757382879	0	0	0	N	ID=COSM1033683;OCCURENCE=1(endometrium)	.
chr22	35719519	35719519	G	A	exonic	TOM1	target of myb1 membrane trafficking protein	nonsynonymous SNV	p.D133N	rs771648997	0	0	0	N	ID=COSM4103751,COSM4103750;OCCURENCE=1(stomach)	.
chr22	36689392	36689392	C	T	exonic	MYH9	myosin heavy chain 9	nonsynonymous SNV	p.A1360T	rs569649580	0	0	0	N	ID=COSM3405643;OCCURENCE=1(central_nervous_system)	.
chr22	37414608	37414608	C	T	exonic	TST	thiosulfate sulfurtransferase	nonsynonymous SNV	p.A56T		0	0	0	D	ID=COSM1230732;OCCURENCE=1(large_intestine)	.
chr22	37964429	37964429	T	C	exonic	CDC42EP1	CDC42 effector protein 1	nonsynonymous SNV	p.S260P	rs62235034	0	0	0	N	ID=COSM4156232;OCCURENCE=1(salivary_gland),4(thyroid)	.
chr22	38130773	38130773	G	-	exonic	TRIOBP	TRIO and F-actin binding protein	frameshift deletion	p.G1479fs	rs778824544	0	0	0		ID=COSM1180934;OCCURENCE=4(large_intestine)	.
chr22	38221451	38221451	G	A	exonic	GALR3	galanin receptor 3	nonsynonymous SNV	p.G361R		0	0	0	N	ID=COSM5745496;OCCURENCE=1(pancreas)	.	J18 (GALANIN ANALOGUE); GALANIN(2-11); M15; M1151; J20 (GALANIN ANALOGUE); GALANIN-LIKE PEPTIDE; [125I][TYR26]GALANIN (PIG); GALANIN(3-29) (PIG); GALANIN; M617; M35; GALANIN(2-29) (PIG); GALANIN(7-29) (PIG); M871; M40; M1152; GALANIN; GALANIN(1-16) (RAT/MOUSE/PIG); M1160; GALANIN(D-TRP2) (PIG); GALANIN; M32; M1145; M1153; SNAP 398299; C7; SNAP 37889
chr22	38470380	38470380	C	T	exonic	PICK1	protein interacting with PRKCA 1	nonsynonymous SNV	p.R301C		0	0	0	D	ID=COSM392957;OCCURENCE=1(stomach),1(lung)	.
chr22	38823825	38823825	C	T	exonic	KCNJ4	potassium voltage-gated channel subfamily J member 4	nonsynonymous SNV	p.G105R		0	0	0	N	ID=COSM6691182;OCCURENCE=1(large_intestine)	.	SPERMIDINE; SCH-23390; ZN2+; H+; CS+; ARACHIDONIC ACID; MG2+; BA2+; TENIDAP; SPERMINE; TETRAETHYLAMMONIUM; PUTRESCINE
chr22	39355623	39355623	G	A	exonic	APOBEC3A;APOBEC3A_B	apolipoprotein B mRNA editing enzyme catalytic subunit 3A,APOBEC3A and APOBEC3B deletion hybrid	nonsynonymous SNV	p.E36K	rs867336934	0	0	0	D	ID=COSM3554450;OCCURENCE=1(skin)	.
chr22	39382073	39382073	G	A	exonic	APOBEC3B	apolipoprotein B mRNA editing enzyme catalytic subunit 3B	nonsynonymous SNV	p.R144H	rs200407707	0	0	0	N	ID=COSM337720;OCCURENCE=1(prostate),1(lung),1(large_intestine),1(central_nervous_system)	.
chr22	39477083	39477083	C	T	exonic	APOBEC3G	apolipoprotein B mRNA editing enzyme catalytic subunit 3G	nonsynonymous SNV	p.T106M	rs756302637	0	0	0	N	ID=COSM4104178,COSM4104179;OCCURENCE=1(stomach),1(liver)	.
chr22	40037050	40037050	C	T	exonic	CACNA1I	calcium voltage-gated channel subunit alpha1 I	nonsynonymous SNV	p.R307C	rs772920338	0	0	0	N	ID=COSM3964305,COSM3964306,COSM3964304,COSM3964303;OCCURENCE=1(lung),2(large_intestine)	.	PREGABALIN; ABT-639; PIMOZIDE; MIBEFRADIL DIHYDROCHLORIDE; GABAPENTIN ENACARBIL; METHSUXIMIDE; PREGABALIN; TRIMETHADIONE; MIBEFRADIL; PD-200390; Z944; ZONISAMIDE; BEPRIDIL HYDROCHLORIDE; PARAMETHADIONE; METHSUXIMIDE; PARAMETHADIONE; TTA-A2; ANANDAMIDE; FLUNARIZINE; MIBEFRADIL; PARAMETHADIONE; GABAPENTIN ENACARBIL; PARAMETHADIONE; ETHOSUXIMIDE; VERAPAMIL; FLUNARIZINE; PHENSUXIMIDE; ATAGABALIN; ETH…
chr22	41574907	41574907	G	A	exonic	EP300	E1A binding protein p300	nonsynonymous SNV	p.D2398N	rs540813452	1	0	0	N	ID=COSM4943270;OCCURENCE=1(breast),1(large_intestine)	.	EPIGALLOCATECHIN-3-GALLATE; H3-COA-20; CURCUMIN; C646; GARCINOL; PLUMBAGIN; ANACARDIC ACID; I-CBP112; SGC-CBP30; LYS-COA
chr22	41615486	41615486	G	A	exonic	L3MBTL2	L3MBTL2, polycomb repressive complex 1 subunit	nonsynonymous SNV	p.D222N		0	0	0	N	ID=COSM1308215;OCCURENCE=1(urinary_tract)	.
chr22	42276973	42276973	G	A	exonic	SREBF2	sterol regulatory element binding transcription factor 2	nonsynonymous SNV	p.R672Q	rs138200400	0	0	0	N	ID=COSM6790146;OCCURENCE=1(large_intestine)	.
chr22	43564160	43564160	G	A	exonic	TTLL12	tubulin tyrosine ligase like 12	nonsynonymous SNV	p.R597W		0	0	0	D	ID=COSM3062102;OCCURENCE=2(large_intestine)	.
chr22	44112819	44112819	G	A	exonic	EFCAB6	EF-hand calcium binding domain 6	nonsynonymous SNV	p.S264F		0	0	0	N	ID=COSM3555173;OCCURENCE=4(skin)	.
chr22	44237732	44237732	C	T	exonic	SULT4A1	sulfotransferase family 4A member 1	nonsynonymous SNV	p.E84K		0	0	0	N	ID=COSM5515800,COSM5515801;OCCURENCE=1(biliary_tract)	.
chr22	50530453	50530453	C	T	exonic	MOV10L1	Mov10 RISC complex RNA helicase like 1	nonsynonymous SNV	p.R41W	rs973304201	0	0	0	D	ID=COSM6714487,COSM6714486;OCCURENCE=1(large_intestine)	.
chr22	50941923	50941923	C	T	exonic	LMF2	lipase maturation factor 2	nonsynonymous SNV	p.R674H	rs767504721	0	0	0	N	ID=COSM1130399,COSM4876291;OCCURENCE=1(prostate)	.
chr22	51043230	51043230	C	T	exonic	MAPK8IP2	mitogen-activated protein kinase 8 interacting protein 2	unknown	p.D500D		0	0	0		ID=COSM5734105,COSM5734107,COSM5734106;OCCURENCE=1(pancreas)	.
chr22	51143207	51143207	C	T	exonic	SHANK3	SH3 and multiple ankyrin repeat domains 3	nonsynonymous SNV	p.P621S		0	0	0	N	ID=COSM3555849;OCCURENCE=1(skin)	.
chr3	9057316	9057316	G	A	exonic	SRGAP3	SLIT-ROBO Rho GTPase activating protein 3	nonsynonymous SNV	p.P593L		0	0	0	D	ID=COSM3597922,COSM4897791;OCCURENCE=1(skin)	.
chr3	10491134	10491134	G	A	exonic	ATP2B2	ATPase plasma membrane Ca2+ transporting 2	nonsynonymous SNV	p.R32C	rs761073766	0	0	0	D	ID=COSM3584841,COSM3584840;OCCURENCE=1(skin)	.
chr3	12645693	12645693	G	A	exonic	RAF1	Raf-1 proto-oncogene, serine/threonine kinase	nonsynonymous SNV	p.S259F	rs397516827	0	1	S259F	D	ID=COSM1536534,COSM4318695;OCCURENCE=2(lung),1(upper_aerodigestive_tract)	Sorafenib, RAF inhibitors	SORAFENIB; REGORAFENIB; ARQ-736; SORAFENIB TOSYLATE; SORAFENIB; XL281; ISIS 5132; SORAFENIB; REGORAFENIB; SORAFENIB; C-RAF ANTISENSE OLIGONUCLEOTIDE; CEP-32496; MLN-2480; VEMURAFENIB; LGX818; GW5074; XL-281; ICO-007; CHIR-265; XL281; LY3009120; Sorafenib; Sorafenib; REGORAFENIB; ARQ736; SORAFENIB; ICO-007; L779450; ZM336372; SORAFENIB TOSYLATE; RG-7376; U0126; LY-3009120; PLX8394; SORAFENIB TOSYL…
chr3	12867068	12867068	G	A	exonic	CAND2	cullin associated and neddylation dissociated 2 (putative)	nonsynonymous SNV	p.R1047Q		0	0	0	D	ID=COSM4113291,COSM4113290;OCCURENCE=1(stomach)	.
chr3	12877613	12877613	G	A	exonic	RPL32	ribosomal protein L32	nonsynonymous SNV	p.R148C	rs752241403	0	0	0	D	ID=COSM4318780;OCCURENCE=1(thyroid),1(large_intestine)	.
chr3	14509431	14509431	G	A	exonic	SLC6A6	solute carrier family 6 member 6	nonsynonymous SNV	p.G313E		0	0	0	D	ID=COSM3392101;OCCURENCE=1(pancreas)	.
chr3	30691775	30691775	G	A	exonic	TGFBR2	transforming growth factor beta receptor 2	nonsynonymous SNV	p.E118K	rs766473954	1	0	0	N	ID=COSM3940482,COSM3940481;OCCURENCE=1(oesophagus)	.	COMPOUND 15B [PMID: 16539403]; COMPOUND 13A [PMID: 23639540]; TG-C; LY2109761; COMPOUND 13D [PMID: 23639540]
chr3	30732969	30732969	C	T	exonic	TGFBR2	transforming growth factor beta receptor 2	nonsynonymous SNV	p.R553C	rs104893810	1	0	R553C	D	ID=COSM1650139,COSM583215;OCCURENCE=1(pancreas),1(oesophagus),1(lung),6(large_intestine),1(small_intestine)	.	COMPOUND 15B [PMID: 16539403]; COMPOUND 13A [PMID: 23639540]; TG-C; LY2109761; COMPOUND 13D [PMID: 23639540]
chr3	32483476	32483476	G	A	exonic	CMTM7	CKLF like MARVEL transmembrane domain containing 7	nonsynonymous SNV	p.V102M	rs765824035	0	0	0	N	ID=COSM3974373;OCCURENCE=1(kidney),1(central_nervous_system)	.
chr3	36484932	36484932	G	A	exonic	STAC	SH3 and cysteine rich domain	nonsynonymous SNV	p.R63Q	rs372584922	0	0	0	D	ID=COSM730283;OCCURENCE=6(skin),1(lung)	.
chr3	37555261	37555261	C	T	exonic	ITGA9	integrin subunit alpha 9	nonsynonymous SNV	p.S302F		0	0	0	D	ID=COSM5779594;OCCURENCE=1(breast)	.
chr3	38048048	38048048	C	T	exonic	VILL	villin like	stopgain	p.R772X	rs766812440	0	0	0		ID=COSM2985619;OCCURENCE=1(large_intestine)	.
chr3	38347743	38347743	C	T	exonic	SLC22A14	solute carrier family 22 member 14	nonsynonymous SNV	p.P76S		0	0	0	D	ID=COSM4895718;OCCURENCE=1(skin)	.
chr3	38357085	38357085	C	T	exonic	SLC22A14	solute carrier family 22 member 14	nonsynonymous SNV	p.P472L	rs747475345	0	0	0	N	ID=COSM4117255;OCCURENCE=1(stomach),1(large_intestine)	.
chr3	38592323	38592323	C	T	exonic	SCN5A	sodium voltage-gated channel alpha subunit 5	nonsynonymous SNV	p.R1847H	rs369058100	0	0	0	D	ID=COSM3408642,COSM3408641,COSM1131464;OCCURENCE=1(pancreas),1(prostate),1(central_nervous_system)	.	FOSPHENYTOIN; DRONEDARONE HYDROCHLORIDE; ETHOTOIN; SAFINAMIDE; FLECAINIDE; PROPAFENONE HYDROCHLORIDE; CARBAMAZEPINE; PROCAINAMIDE; CARBAMAZEPINE; AFT-II; ETHOTOIN; OXCARBAZEPINE; LIDOCAINE; DISOPYRAMIDE; PHENACEMIDE; DISOPYRAMIDE; LIDOCAINE; FOSPHENYTOIN; PROPARACAINE HYDROCHLORIDE; PRILOCAINE; FOSPHENYTOIN SODIUM; MORICIZINE; BENZONATATE; BEPRIDIL; PROPARACAINE; QUINIDINE POLYGALACTURONATE; BENZ…
chr3	38645351	38645351	G	A	exonic	SCN5A	sodium voltage-gated channel alpha subunit 5	nonsynonymous SNV	p.S581L	rs757945763	0	0	0	D	ID=COSM1422823,COSM1422822,COSM1422821;OCCURENCE=4(large_intestine)	.	FOSPHENYTOIN; DRONEDARONE HYDROCHLORIDE; ETHOTOIN; SAFINAMIDE; FLECAINIDE; PROPAFENONE HYDROCHLORIDE; CARBAMAZEPINE; PROCAINAMIDE; CARBAMAZEPINE; AFT-II; ETHOTOIN; OXCARBAZEPINE; LIDOCAINE; DISOPYRAMIDE; PHENACEMIDE; DISOPYRAMIDE; LIDOCAINE; FOSPHENYTOIN; PROPARACAINE HYDROCHLORIDE; PRILOCAINE; FOSPHENYTOIN SODIUM; MORICIZINE; BENZONATATE; BEPRIDIL; PROPARACAINE; QUINIDINE POLYGALACTURONATE; BENZ…
chr3	38812783	38812783	C	T	exonic	SCN10A	sodium voltage-gated channel alpha subunit 10	nonsynonymous SNV	p.V196I		0	0	0	D	ID=COSM187343;OCCURENCE=1(skin),1(central_nervous_system)	.	ARTICAINE HYDROCHLORIDE; FOSPHENYTOIN SODIUM; TETRACAINE; HEXYLCAINE HYDROCHLORIDE; DYCLONINE; PROPARACAINE; ROPIVACAINE HYDROCHLORIDE; ORPHENADRINE CITRATE; DIBUCAINE HYDROCHLORIDE; RUFINAMIDE; TETRACAINE; ORPHENADRINE (CHLORIDE); MEPHENYTOIN; QUINIDINE GLUCONATE; ZONISAMIDE; OXYBUPROCAINE; LAMOTRIGINE; DIBUCAINE; DYCLONINE HYDROCHLORIDE; BENZOCAINE; LIDOCAINE; HEXYLCAINE; MERETHOXYLLINE PROCAIN…
chr3	39230320	39230320	C	T	exonic	XIRP1	xin actin binding repeat containing 1	nonsynonymous SNV	p.R206H	rs149500349	0	0	0	N	ID=COSM5059719;OCCURENCE=1(stomach),1(skin)	.
chr3	45500311	45500311	G	A	exonic	LARS2	leucyl-tRNA synthetase 2, mitochondrial	nonsynonymous SNV	p.R228H	rs770440975	0	0	0	D	ID=COSM6699697;OCCURENCE=1(large_intestine)	.
chr3	47032984	47032984	C	T	exonic	NBEAL2	neurobeachin like 2	nonsynonymous SNV	p.P244L	rs374746619	0	0	0	N	ID=COSM1045368;OCCURENCE=1(endometrium)	.
chr3	47161939	47161939	T	-	exonic	SETD2	SET domain containing 2	frameshift deletion	p.N1396fs		1	0	0		ID=COSM6044500,COSM6044499;OCCURENCE=1(large_intestine)	.	HIF-1ALPHA; PX-478
chr3	48265110	48265110	G	A	exonic	CAMP	cathelicidin antimicrobial peptide	nonsynonymous SNV	p.E40K	rs180948240	0	0	0	D	ID=COSM4584422;OCCURENCE=1(bone)	.
chr3	48615932	48615932	C	T	exonic	COL7A1	collagen type VII alpha 1 chain	nonsynonymous SNV	p.R1814H	rs756258247	0	0	0	D	ID=COSM1423779;OCCURENCE=1(haematopoietic_and_lymphoid_tissue),1(large_intestine)	.
chr3	49412898	49412898	T	C	exonic	RHOA	ras homolog family member A	nonsynonymous SNV	p.Y42C	rs1057519954	0	1	Y42C	D	ID=COSM2849892;OCCURENCE=1(breast),17(stomach),1(large_intestine)	.
chr3	49723322	49723327	GCGCTG	-	exonic	MST1	macrophage stimulating 1	nonframeshift deletion	p.Q406_R407del	rs754122895	0	0	0		ID=COSM1724580;OCCURENCE=1(skin),2(prostate),1(upper_aerodigestive_tract)	.	RETINOIC ACID
chr3	50225353	50225353	C	-	exonic	SEMA3F	semaphorin 3F	frameshift deletion	p.P723fs		0	0	0		ID=COSM6774561;OCCURENCE=1(large_intestine)	.
chr3	51399361	51399361	G	A	exonic	DOCK3	dedicator of cytokinesis 3	nonsynonymous SNV	p.G1693E		0	0	0	N	ID=COSM5596615,COSM5596616;OCCURENCE=1(skin)	.
chr3	51418727	51418727	G	A	exonic	DOCK3	dedicator of cytokinesis 3	nonsynonymous SNV	p.V1944I	rs782054736	0	0	0	N	ID=COSM6648116,COSM86442;OCCURENCE=1(ovary),1(large_intestine)	.
chr3	52238732	52238732	C	T	exonic	ALAS1	5'-aminolevulinate synthase 1	nonsynonymous SNV	p.R201C	rs761283191	0	0	0	D	ID=COSM3427731;OCCURENCE=1(large_intestine)	.
chr3	52406318	52406318	G	A	exonic	DNAH1	dynein axonemal heavy chain 1	nonsynonymous SNV	p.D2248N		0	0	0	N	ID=COSM6011020,COSM6011019;OCCURENCE=1(skin)	.
chr3	52485461	52485461	C	T	exonic	TNNC1	troponin C1, slow skeletal and cardiac type	nonsynonymous SNV	p.E134K		0	0	0	N	ID=COSM6805401;OCCURENCE=1(large_intestine)	.	DIHYDROXYALUMINIUM; TIRAMSETIV; LEVOSIMENDAN; LEVOSIMENDAN; LEVOSIMENDAN; BEPRIDIL; BEPRIDIL
chr3	52539106	52539106	G	A	exonic	STAB1	stabilin 1	nonsynonymous SNV	p.V489M	rs373323793	0	0	0	D	ID=COSM6011027;OCCURENCE=1(skin)	.
chr3	52734467	52734467	G	A	exonic	GLT8D1	glycosyltransferase 8 domain containing 1	nonsynonymous SNV	p.R4C	rs748458376	0	0	0	N	ID=COSM4687279;OCCURENCE=1(large_intestine)	.
chr3	56468863	56468863	G	A	exonic	ERC2	ELKS/RAB6-interacting/CAST family member 2	nonsynonymous SNV	p.T58M	rs369150569	0	0	0	N	ID=COSM3357738,COSM3357737;OCCURENCE=1(haematopoietic_and_lymphoid_tissue)	.
chr3	58154200	58154200	G	A	exonic	FLNB	filamin B	nonsynonymous SNV	p.R2442Q	rs775075616	0	0	0	N	ID=COSM5637533,COSM5637534;OCCURENCE=1(oesophagus)	.
chr3	67058562	67058562	C	T	exonic	KBTBD8	kelch repeat and BTB domain containing 8	nonsynonymous SNV	p.S520F		0	0	0	N	ID=COSM3597186,COSM3597185;OCCURENCE=1(skin)	.
chr3	73432821	73432821	C	T	exonic	PDZRN3	PDZ domain containing ring finger 3	nonsynonymous SNV	p.E966K	rs890173921	0	0	0	D	ID=COSM4812208,COSM3775354,COSM3775355;OCCURENCE=1(urinary_tract),1(pancreas),1(large_intestine)	.
chr3	78685111	78685111	C	T	exonic	ROBO1	roundabout guidance receptor 1	nonsynonymous SNV	p.R1062H	rs770855014	0	0	0	N	ID=COSM3974584,COSM86574,COSM3974586,COSM3974585;OCCURENCE=1(ovary),1(large_intestine),1(central_nervous_system)	.
chr3	97851709	97851709	T	G	exonic	OR5H1	olfactory receptor family 5 subfamily H member 1	nonsynonymous SNV	p.H56Q	rs745332178	0	0	0	N	ID=COSM5002457;OCCURENCE=1(pancreas)	.
chr3	98073044	98073044	C	T	exonic	OR5K4	olfactory receptor family 5 subfamily K member 4	nonsynonymous SNV	p.A116V	rs185693146	0	0	0	N	ID=COSM1260494;OCCURENCE=1(stomach),1(large_intestine)	.
chr3	108179166	108179166	G	A	exonic	MYH15	myosin heavy chain 15	nonsynonymous SNV	p.T658M	rs370614771	0	0	0	D	ID=COSM2916904;OCCURENCE=1(large_intestine)	.
chr3	112066476	112066476	C	T	exonic	CD200	CD200 molecule	nonsynonymous SNV	p.R190C	rs36015707	0	0	0	N	ID=COSM4406804;OCCURENCE=1(pancreas)	.	SAMALIZUMAB
chr3	112198616	112198616	C	T	exonic	BTLA	B and T lymphocyte associated	nonsynonymous SNV	p.G30E		0	0	0	N	ID=COSM5926411;OCCURENCE=1(skin)	.
chr3	112992161	112992161	G	A	exonic	BOC	BOC cell adhesion associated, oncogene regulated	nonsynonymous SNV	p.V403I	rs777320137	0	0	0	N	ID=COSM1184813;OCCURENCE=2(large_intestine)	.
chr3	113375203	113375203	G	A	exonic	USF3	upstream transcription factor family member 3	stopgain	p.R1776X	rs905471751	0	0	0		ID=COSM1212324;OCCURENCE=3(large_intestine)	.
chr3	113878657	113878657	C	T	exonic	DRD3	dopamine receptor D3	nonsynonymous SNV	p.D110N		0	0	0	D	ID=COSM727125;OCCURENCE=1(lung)	.	BROMOCRIPTINE; HALOPERIDOL DECANOATE; PERGOLIDE MESYLATE; LEVODOPA; COCAINE; AMISULPRIDE; ROPINIROLE; BP4.879A; PF-592379; PROMAZINE; TERGURIDE; PROCHLORPERAZINE; ETILEVODOPA; (+)-AJ76; BP 897; (-)-SULPIRIDE; THIORIDAZINE HYDROCHLORIDE; ROPINIROL; PF-217830; VILAZODONE; PNU-177864; FLUPENTIXOL; PRAMIPEXOLE; BROMOCRIPTINE; ROPINIROLE HYDROCHLORIDE; SB-277011; (-)-N-PORPHYNORAPOMORPHINE; LOXAPINE S…
chr3	121212455	121212455	G	A	exonic	POLQ	DNA polymerase theta	nonsynonymous SNV	p.R798W	rs753866746	0	0	0	D	ID=COSM5915204;OCCURENCE=1(skin)	.
chr3	121341916	121341916	C	T	exonic	FBXO40	F-box protein 40	nonsynonymous SNV	p.P547L	rs144132932	0	0	0	N	ID=COSM1418162;OCCURENCE=1(large_intestine)	.
chr3	122269585	122269585	G	A	exonic	PARP9	poly(ADP-ribose) polymerase family member 9	nonsynonymous SNV	p.S426F		0	0	0	N	ID=COSM3586308;OCCURENCE=4(skin)	.
chr3	122459454	122459454	G	A	exonic	HSPBAP1	HSPB1 associated protein 1	nonsynonymous SNV	p.P402L	rs371225480	0	0	0	N	ID=COSM4112798;OCCURENCE=1(stomach)	.
chr3	123046524	123046524	C	T	exonic	ADCY5	adenylate cyclase 5	nonsynonymous SNV	p.A630T	rs200831250	0	0	0	N	ID=COSM6594979;OCCURENCE=1(large_intestine)	.	NKY80
chr3	124103708	124103708	C	T	exonic	KALRN	kalirin RhoGEF kinase	nonsynonymous SNV	p.A594V		0	0	0	D	ID=COSM3426985,COSM3426986;OCCURENCE=1(lung),1(large_intestine)	.
chr3	124380731	124380731	C	T	exonic	KALRN	kalirin RhoGEF kinase	nonsynonymous SNV	p.R2100C	rs140557803	0	0	0	D	ID=COSM5355645,COSM5355644;OCCURENCE=1(large_intestine)	.
chr3	124462863	124462863	C	T	exonic	UMPS	uridine monophosphate synthetase	nonsynonymous SNV	p.R459C	rs928740792	0	0	0	D	ID=COSM233715;OCCURENCE=1(skin)	.
chr3	127327810	127327810	G	A	exonic	MCM2	minichromosome maintenance complex component 2	nonsynonymous SNV	p.D458N	rs376973485	0	0	0	N	ID=COSM3587020;OCCURENCE=1(skin)	.
chr3	131415403	131415403	G	A	exonic	CPNE4	copine 4	nonsynonymous SNV	p.R182W	rs373479979	0	0	0	D	ID=COSM4873415,COSM290737;OCCURENCE=1(large_intestine),1(endometrium)	.
chr3	134851684	134851684	C	T	exonic	EPHB1	EPH receptor B1	nonsynonymous SNV	p.R364W	rs373293977	0	0	0	N	ID=COSM4113791,COSM4113792;OCCURENCE=1(stomach),1(skin)	.	VANDETANIB; PROGESTERONE; COMPOUND 66 [PMID: 19788238]; BFGF
chr3	136240208	136240208	G	A	exonic	STAG1	stromal antigen 1	nonsynonymous SNV	p.R175C	rs756848648	0	0	0	D	ID=COSM277497;OCCURENCE=1(large_intestine)	.
chr3	136573486	136573486	A	-	exonic	SLC35G2	solute carrier family 35 member G2	frameshift deletion	p.R66fs	rs758765963	0	0	0		ID=COSM1419380;OCCURENCE=1(breast),1(NS),3(stomach),1(liver),17(large_intestine)	.
chr3	138763241	138763241	C	G	exonic	PRR23C	proline rich 23C	nonsynonymous SNV	p.E74D	rs139317074	0	0	0	N	ID=COSM3944928;OCCURENCE=1(lung)	.
chr3	140401494	140401494	G	A	exonic	TRIM42	tripartite motif containing 42	nonsynonymous SNV	p.E178K	rs1002465823	0	0	0	N	ID=COSM4171206;OCCURENCE=1(haematopoietic_and_lymphoid_tissue)	.
chr3	140419760	140419760	C	T	exonic	TRIM42	tripartite motif containing 42	stopgain	p.R706X	rs749927472	0	0	0		ID=COSM3124559;OCCURENCE=1(large_intestine)	.
chr3	141231095	141231095	G	A	exonic	RASA2	RAS p21 protein activator 2	nonsynonymous SNV	p.R75H	rs759141778	0	0	0	D	ID=COSM3124692,COSM76170;OCCURENCE=1(ovary),1(stomach),1(prostate)	.
chr3	142548686	142548686	G	A	exonic	PCOLCE2	procollagen C-endopeptidase enhancer 2	nonsynonymous SNV	p.P238L		0	0	0	N	ID=COSM3427174;OCCURENCE=1(large_intestine)	.
chr3	145796953	145796953	G	A	exonic	PLOD2	procollagen-lysine,2-oxoglutarate 5-dioxygenase 2	nonsynonymous SNV	p.R484C	rs774012315	0	0	0	D	ID=COSM1039563;OCCURENCE=1(endometrium)	.
chr3	148939579	148939579	T	-	exonic	CP	ceruloplasmin	stopgain	p.M1fs	rs750317184	0	0	0		ID=COSM1419845;OCCURENCE=1(stomach),4(large_intestine)	.	DEXRAZOXANE; IMMUNOSUPPRESSIVE; AMPICILLIN; SODIUM MOLYBDATE; TUMOR NECROSIS FACTOR; ORAL CONTRACEPTIVE; CLOMIPHENE CITRATE; CELL SURFACE ANTIGEN; PENICILLAMINE; PROGESTERONE; VINCRISTINE; HYDROXYUREA; NICOTINE; ISOFLAVONE; OESTRADIOL; ISOPROTERENOL; DES; INTERFERON BETA; DANAZOL; IL-1RA; TETRANDRINE; CARDIOPROTECTIVE AGENT; BSO; FREUNDS ADJUVANT; PROTOPORPHYRIN
chr3	154032978	154032978	T	-	exonic	DHX36	DEAH-box helicase 36	frameshift deletion	p.M154fs	rs747023532	0	0	0		ID=COSM1420119,COSM4337392;OCCURENCE=3(stomach),3(large_intestine)	.
chr3	154042066	154042066	C	T	exonic	DHX36	DEAH-box helicase 36	nonsynonymous SNV	p.R47Q		0	0	0	N	ID=COSM3846561,COSM3846562;OCCURENCE=1(breast)	.
chr3	167246892	167246892	C	T	exonic	WDR49	WD repeat domain 49	nonsynonymous SNV	p.R433Q	rs760614422	0	0	0	N	ID=COSM3589774,COSM3589773;OCCURENCE=2(skin)	.
chr3	167254728	167254728	C	T	exonic	WDR49	WD repeat domain 49	stopgain	p.W276X		0	0	0		ID=COSM4560060,COSM4560061;OCCURENCE=5(skin)	.
chr3	170184992	170184992	G	A	exonic	SLC7A14	solute carrier family 7 member 14	nonsynonymous SNV	p.P723S	rs1018189773	0	0	0	N	ID=COSM1041089;OCCURENCE=1(endometrium)	.
chr3	183884625	183884625	C	T	exonic	DVL3	dishevelled segment polarity protein 3	nonsynonymous SNV	p.R354W	rs201442250	0	0	0	N	ID=COSM4981832;OCCURENCE=2(oesophagus)	.
chr3	183994405	183994405	C	T	exonic	ECE2	endothelin converting enzyme 2	nonsynonymous SNV	p.T59M		0	0	0	N	ID=COSM2151920;OCCURENCE=1(pancreas),1(central_nervous_system)	.	COMPOUND 1 [PMID: 18507370]; S136492
chr3	189612028	189612028	C	T	exonic	TP63	tumor protein p63	stopgain	p.R594X		0	0	0		ID=COSM3591234,COSM285877;OCCURENCE=1(NS),1(stomach),4(skin),3(large_intestine),2(endometrium)	.
chr3	191888366	191888366	C	T	exonic	FGF12	fibroblast growth factor 12	nonsynonymous SNV	p.R165H	rs768509717	0	0	0	D	ID=COSM1421669,COSM4321688,COSM1421670;OCCURENCE=1(oesophagus),2(large_intestine)	.
chr3	193120632	193120632	C	A	exonic	ATP13A4	ATPase 13A4	nonsynonymous SNV	p.A1134S		0	0	0	N	ID=COSM4664245;OCCURENCE=2(large_intestine)	.
chr3	193160315	193160315	G	A	exonic	ATP13A4	ATPase 13A4	nonsynonymous SNV	p.A728V		0	0	0	D	ID=COSM4116119;OCCURENCE=1(stomach)	.
chr3	194062821	194062821	G	A	exonic	CPN2	carboxypeptidase N subunit 2	nonsynonymous SNV	p.A204V	rs146126834	0	0	0	N	ID=COSM1042674;OCCURENCE=1(endometrium)	.
chr3	195505801	195505801	G	T	exonic	MUC4	mucin 4, cell surface associated	nonsynonymous SNV	p.A4217E		0	0	0	N	ID=COSM3746622,COSM479885;OCCURENCE=1(kidney),1(liver)	.
chr3	195505801	195505801	G	A	exonic	MUC4	mucin 4, cell surface associated	nonsynonymous SNV	p.A4217V	rs149026852	0	0	0	N	ID=COSM1484996,COSM5428437;OCCURENCE=1(haematopoietic_and_lymphoid_tissue),2(liver),2(thyroid)	.
chr3	195505829	195505829	G	A	exonic	MUC4	mucin 4, cell surface associated	nonsynonymous SNV	p.P4208S	rs560359693	0	0	0	N	ID=COSM1485000;OCCURENCE=1(NS),1(haematopoietic_and_lymphoid_tissue),1(oesophagus),2(lung),1(large_intestine)	.
chr3	195506005	195506005	A	C	exonic	MUC4	mucin 4, cell surface associated	nonsynonymous SNV	p.I4149S	rs202017381	0	0	0	N	ID=COSM1042837;OCCURENCE=1(kidney),1(liver),1(skin),2(thyroid),1(upper_aerodigestive_tract),1(central_nervous_system),1(endometrium)	.
chr3	195506887	195506887	A	G	exonic	MUC4	mucin 4, cell surface associated	nonsynonymous SNV	p.M3855T	rs111268063	0	0	0	N	ID=COSM4002566;OCCURENCE=1(haematopoietic_and_lymphoid_tissue),3(urinary_tract),1(thyroid),2(upper_aerodigestive_tract)	.
chr3	195506987	195506987	T	C	exonic	MUC4	mucin 4, cell surface associated	nonsynonymous SNV	p.T3822A	rs879702090	0	0	0	N	ID=COSM226962,COSM226963;OCCURENCE=1(urinary_tract),1(oesophagus),1(skin),1(thyroid),14(upper_aerodigestive_tract),1(central_nervous_system)	.
chr3	195507262	195507262	T	G	exonic	MUC4	mucin 4, cell surface associated	nonsynonymous SNV	p.H3730P	rs200927864	0	0	0	N	ID=COSM1318694;OCCURENCE=1(haematopoietic_and_lymphoid_tissue),1(kidney),1(thyroid),14(upper_aerodigestive_tract),3(central_nervous_system)	.
chr3	195508133	195508133	G	A	exonic	MUC4	mucin 4, cell surface associated	nonsynonymous SNV	p.P3440S	rs202065387	0	0	0	N	ID=COSM3774069,COSM479907;OCCURENCE=1(NS),2(haematopoietic_and_lymphoid_tissue),2(kidney),1(pancreas),2(lung),1(cervix),2(endometrium)	.
chr3	195508903	195508903	G	A	exonic	MUC4	mucin 4, cell surface associated	nonsynonymous SNV	p.T3183M	rs778176783	0	0	0	N	ID=COSM227726,COSM227727;OCCURENCE=1(haematopoietic_and_lymphoid_tissue),1(kidney),1(skin),1(thyroid),1(upper_aerodigestive_tract)	.
chr3	195509182	195509182	G	T	exonic	MUC4	mucin 4, cell surface associated	nonsynonymous SNV	p.P3090H	rs200444826	0	0	0	N	ID=COSM2944923,COSM1136996;OCCURENCE=1(kidney),1(prostate)	.
chr3	195509498	195509498	C	T	exonic	MUC4	mucin 4, cell surface associated	nonsynonymous SNV	p.A2985T		0	0	0	N	ID=COSM1042879,COSM3774080;OCCURENCE=1(kidney),1(prostate),2(upper_aerodigestive_tract),2(endometrium)	.
chr3	195509525	195509525	G	A	exonic	MUC4	mucin 4, cell surface associated	nonsynonymous SNV	p.P2976S	rs550606134	0	0	0	N	ID=COSM1042880;OCCURENCE=2(endometrium)	.
chr3	195509641	195509641	A	G	exonic	MUC4	mucin 4, cell surface associated	nonsynonymous SNV	p.V2937A	rs879646128	0	0	0	N	ID=COSM4157670;OCCURENCE=1(thyroid),1(upper_aerodigestive_tract)	.
chr3	195509909	195509909	G	A	exonic	MUC4	mucin 4, cell surface associated	nonsynonymous SNV	p.P2848S	rs373296068	0	0	0	N	ID=COSM4322368,COSM4322367;OCCURENCE=1(NS),1(liver)	.
chr3	195511390	195511390	T	A	exonic	MUC4	mucin 4, cell surface associated	nonsynonymous SNV	p.H2354L	rs75692609	0	0	0	N	ID=COSM6425765,COSM1042899;OCCURENCE=1(thyroid),1(endometrium)	.
chr3	195512212	195512212	G	T	exonic	MUC4	mucin 4, cell surface associated	nonsynonymous SNV	p.P2080H	rs75588776	0	0	0	N	ID=COSM149601,COSM149602;OCCURENCE=1(salivary_gland),1(ovary),1(stomach),2(haematopoietic_and_lymphoid_tissue),1(thyroid),14(upper_aerodigestive_tract),3(large_intestine),2(central_nervous_system)	.
chr3	195512597	195512597	G	A	exonic	MUC4	mucin 4, cell surface associated	nonsynonymous SNV	p.P1952S	rs6799339	0	0	0	N	ID=COSM4157817,COSM1042915;OCCURENCE=2(haematopoietic_and_lymphoid_tissue),2(prostate),4(thyroid),15(upper_aerodigestive_tract),2(large_intestine),2(central_nervous_system),1(endometrium)	.
chr3	195512612	195512612	A	T	exonic	MUC4	mucin 4, cell surface associated	nonsynonymous SNV	p.S1947T	rs76803161	0	0	0	N	ID=COSM4599886,COSM4599885;OCCURENCE=1(upper_aerodigestive_tract)	.
chr3	195513395	195513395	G	T	exonic	MUC4	mucin 4, cell surface associated	nonsynonymous SNV	p.L1686I	rs200241020	0	0	0	N	ID=COSM4322707,COSM4322706;OCCURENCE=16(upper_aerodigestive_tract)	.
chr3	195513397	195513397	C	T	exonic	MUC4	mucin 4, cell surface associated	nonsynonymous SNV	p.G1685D	rs201019164	0	0	0	N	ID=COSM149607,COSM149608;OCCURENCE=1(stomach),9(upper_aerodigestive_tract),1(central_nervous_system)	.
chr3	195513443	195513443	T	G	exonic	MUC4	mucin 4, cell surface associated	nonsynonymous SNV	p.T1670P	rs201054227	0	0	0	N	ID=COSM4157854,COSM4157855;OCCURENCE=2(thyroid),1(upper_aerodigestive_tract)	.
chr3	195515077	195515077	T	C	exonic	MUC4	mucin 4, cell surface associated	nonsynonymous SNV	p.D1125G		0	0	0	N	ID=COSM1042943,COSM3915636;OCCURENCE=1(urinary_tract),1(skin),1(endometrium)	.
chr3	195615303	195615303	G	A	exonic	TNK2	tyrosine kinase non receptor 2	nonsynonymous SNV	p.R116W	rs142416449	0	0	0	N	ID=COSM3591823,COSM3591821,COSM3591822,COSM3591820;OCCURENCE=1(skin)	.	COMPOUND 30 [PMID: 17280833]; BOSUTINIB
chr3	196199528	196199528	G	A	exonic	RNF168	ring finger protein 168	nonsynonymous SNV	p.S293L		0	0	0	N	ID=COSM6896604;OCCURENCE=1(skin)	.
chr3	196388145	196388145	C	T	exonic	NRROS	negative regulator of reactive oxygen species	nonsynonymous SNV	p.S544L	rs200884430	0	0	0	D	ID=COSM1495526;OCCURENCE=1(kidney)	.
chr3	197553772	197553772	C	T	exonic	LRCH3	leucine rich repeats and calponin homology domain containing 3	nonsynonymous SNV	p.R222W	rs760026273	0	0	0	N	ID=COSM6476605,COSM6476604,COSM6476606;OCCURENCE=1(lung)	.
chr4	436689	436689	G	A	exonic	ZNF721	zinc finger protein 721	nonsynonymous SNV	p.H523Y		0	0	0	D	ID=COSM4452066,COSM4452067;OCCURENCE=1(skin)	.
chr4	437664	437664	G	A	exonic	ZNF721	zinc finger protein 721	nonsynonymous SNV	p.R198C	rs782011031	0	0	0	N	ID=COSM1055598;OCCURENCE=1(skin),1(endometrium)	.
chr4	679631	679631	G	A	exonic	MFSD7	major facilitator superfamily domain containing 7	nonsynonymous SNV	p.P193L	rs752053489	0	0	0	N	ID=COSM3303787;OCCURENCE=1(skin)	.
chr4	951785	951785	G	A	exonic	TMEM175	transmembrane protein 175	nonsynonymous SNV	p.R339Q	rs780588853	0	0	0	N	ID=COSM4126776;OCCURENCE=1(stomach)	.
chr4	957074	957074	G	A	exonic	DGKQ	diacylglycerol kinase theta	nonsynonymous SNV	p.A580V	rs770126008	0	0	0	N	ID=COSM4343646;OCCURENCE=1(liver)	.
chr4	1388345	1388346	CA	-	exonic	CRIPAK	cysteine rich PAK1 inhibitor	frameshift deletion	p.T17fs	rs575561207	0	0	0		ID=COSM1319380;OCCURENCE=2(NS),1(haematopoietic_and_lymphoid_tissue),1(lung),1(upper_aerodigestive_tract),2(large_intestine)	.
chr4	1388396	1388396	C	G	exonic	CRIPAK	cysteine rich PAK1 inhibitor	nonsynonymous SNV	p.P33A		0	0	0	N	ID=COSM3683208;OCCURENCE=1(haematopoietic_and_lymphoid_tissue)	.
chr4	1389236	1389236	-	CA	exonic	CRIPAK	cysteine rich PAK1 inhibitor	frameshift insertion	p.S313fs		0	0	0		ID=COSM4674711;OCCURENCE=4(NS),1(urinary_tract),1(large_intestine)	.
chr4	2746645	2746645	G	A	exonic	TNIP2	TNFAIP3 interacting protein 2	nonsynonymous SNV	p.R229C	rs147415827	0	0	0	N	ID=COSM5060323;OCCURENCE=1(stomach)	.
chr4	4436522	4436522	T	A	exonic	STX18	syntaxin 18	nonsynonymous SNV	p.E226V		0	0	0	D	ID=COSM1196433;OCCURENCE=2(lung)	.
chr4	6066624	6066624	C	T	exonic	JAKMIP1	janus kinase and microtubule interacting protein 1	nonsynonymous SNV	p.E472K		0	0	0	N	ID=COSM1694115,COSM1694116;OCCURENCE=2(skin),1(large_intestine)	.
chr4	16504355	16504355	C	T	exonic	LDB2	LIM domain binding 2	nonsynonymous SNV	p.A345T	rs138614817	0	0	0	N	ID=COSM1428335;OCCURENCE=1(stomach),1(large_intestine)	.
chr4	17816578	17816578	G	A	exonic	NCAPG	non-SMC condensin I complex subunit G	nonsynonymous SNV	p.R216H	rs757112253	0	0	0	D	ID=COSM3409176;OCCURENCE=1(central_nervous_system)	.
chr4	22749269	22749269	C	T	exonic	GBA3	glucosylceramidase beta 3 (gene/pseudogene)	unknown	p.R213X	rs201515557	0	0	0		ID=COSM3602962,COSM275264;OCCURENCE=3(skin),3(large_intestine),1(endometrium)	.
chr4	25014056	25014056	C	T	exonic	LGI2	leucine rich repeat LGI family member 2	nonsynonymous SNV	p.D241N		0	0	0	D	ID=COSM1540108;OCCURENCE=2(skin),1(lung)	.
chr4	25865099	25865099	G	C	exonic	SEL1L3	SEL1L family member 3	nonsynonymous SNV	p.N12K		0	0	0	N	ID=COSM1738967;OCCURENCE=1(haematopoietic_and_lymphoid_tissue)	.
chr4	26638903	26638903	G	A	exonic	TBC1D19	TBC1 domain family member 19	nonsynonymous SNV	p.R122Q	rs199598813	0	0	0	N	ID=COSM1054764;OCCURENCE=1(endometrium)	.
chr4	38829222	38829222	G	A	exonic	TLR6	toll like receptor 6	nonsynonymous SNV	p.R625W	rs375362297	0	0	0	N	ID=COSM397271;OCCURENCE=1(skin),1(lung),2(central_nervous_system)	.
chr4	44177192	44177192	C	A	exonic	KCTD8	potassium channel tetramerization domain containing 8	nonsynonymous SNV	p.S346I		0	0	0	N	ID=COSM6190553;OCCURENCE=1(oesophagus)	.
chr4	44626702	44626702	G	A	exonic	YIPF7	Yip1 domain family member 7	nonsynonymous SNV	p.S199L	rs751659018	0	0	0	D	ID=COSM5177837;OCCURENCE=1(large_intestine)	.
chr4	47525087	47525087	C	T	exonic	ATP10D	ATPase phospholipid transporting 10D (putative)	nonsynonymous SNV	p.R182C	rs200556408	0	0	0	D	ID=COSM6496020;OCCURENCE=1(oesophagus)	.
chr4	47682178	47682178	T	G	exonic	CORIN	corin, serine peptidase	nonsynonymous SNV	p.K371T	rs370951437	0	0	0	D	ID=COSM4124929;OCCURENCE=2(stomach)	.
chr4	47839954	47839954	G	A	exonic	CORIN	corin, serine peptidase	nonsynonymous SNV	p.P5S		0	0	0	N	ID=COSM6216637;OCCURENCE=2(oesophagus)	.
chr4	52861635	52861635	C	T	exonic	LRRC66	leucine rich repeat containing 66	nonsynonymous SNV	p.R518H		0	0	0	N	ID=COSM1242480;OCCURENCE=1(breast),1(oesophagus),1(large_intestine)	.
chr4	55594198	55594198	G	A	exonic	KIT	KIT proto-oncogene receptor tyrosine kinase	nonsynonymous SNV	p.R634Q	rs766264502	0	1	0	N	ID=COSM4831072;OCCURENCE=1(cervix),1(large_intestine)	Imatinib, Sunitinib, Novel KIT Inhibitors	IMATINIB; PAZOPANIB HCL; G007-LK; 4'-N-BENZOYLSTAUROSPORINE; AST-487; TANDUTINIB; KI-20227; Sorafenib; MIDOSTAURIN; SU-14813; SUNITINIB; PLX3397; MOTESANIB; SORAFENIB; Regorafenib; FAMITINIB; DASATINIB; AKN-028; OSI-930; Sunitinib; ENMD-2076; CRENOLANIB; Imatinib; MIDOSTAURIN; Imatinib; QUIZARTINIB; Sunitinib; Dasatinib; NILOTINIB; AS703569; Quizartinib; SUNITINIB MALATE; AXITINIB; JNJ-28312141; …	Thymic Tumor,EL:2A:Sunitinib, Sorafenib(25592632, 19461405, 20571495) ; Melanoma,EL:2A:Imatinib(23775962, 18235121, 12181401, 21642685, 16098458, 15451219) ; Gastrointestinal Stromal Tumor,EL:1:Regorafenib, Imatinib, Sunitinib(18235121, 12181401, 17046465, 19282169, 25641662, 16098458, 15451219, 23177515)
chr4	55599340	55599340	T	G	exonic	KIT	KIT proto-oncogene receptor tyrosine kinase	nonsynonymous SNV	p.N822K	rs121913514	0	1	N822K	D	ID=COSM1322;OCCURENCE=1(NS),24(haematopoietic_and_lymphoid_tissue),6(soft_tissue),6(genital_tract),2(skin),3(testis)	Imatinib, Sunitinib, Novel KIT Inhibitors	IMATINIB; PAZOPANIB HCL; G007-LK; 4'-N-BENZOYLSTAUROSPORINE; AST-487; TANDUTINIB; KI-20227; Sorafenib; MIDOSTAURIN; SU-14813; SUNITINIB; PLX3397; MOTESANIB; SORAFENIB; Regorafenib; FAMITINIB; DASATINIB; AKN-028; OSI-930; Sunitinib; ENMD-2076; CRENOLANIB; Imatinib; MIDOSTAURIN; Imatinib; QUIZARTINIB; Sunitinib; Dasatinib; NILOTINIB; AS703569; Quizartinib; SUNITINIB MALATE; AXITINIB; JNJ-28312141; …	Thymic Tumor,EL:2A:Sunitinib, Sorafenib(25592632, 19461405, 20571495) ; Melanoma,EL:2A:Imatinib(23775962, 18235121, 12181401, 21642685, 16098458, 15451219) ; Gastrointestinal Stromal Tumor,EL:1:Regorafenib, Imatinib, Sunitinib(18235121, 12181401, 17046465, 19282169, 25641662, 16098458, 15451219, 23177515) ; Gastrointestinal Stromal Tumor,EL:2A:Sorafenib(23140824, 22270258) ; Thymic Tumor,EL:2A:Su…
chr4	55948737	55948737	G	A	exonic	KDR	kinase insert domain receptor	nonsynonymous SNV	p.P1243L	rs150847930	0	1	0	D	ID=COSM108688;OCCURENCE=1(skin)	KDR inhibitors	LENVATINIB; TELBERMIN; Fruquintinib; SORAFENIB; SU-14813; ENMD-2076; MOTESANIB; Apatinib; Henatinib; Famitinib; FORETINIB; PAZOPANIB; CEDIRANIB; XL820; CEP-11981; MGCD265; SORAFENIB; E-10030; TAK-659; LENVATINIB MESYLATE; BX-912; VANDETANIB; CEP-7055; RAF265; BMS-690514; VANDETANIB; BMS-690514; JI-101; PONATINIB; OSI-930; AEE788; XL999; VATALANIB; GLESATINIB; IMC-1121B; OSI-930; OSI-632; TIVOZANI…
chr4	56730475	56730475	C	T	exonic	EXOC1	exocyst complex component 1	nonsynonymous SNV	p.S113L		0	0	0	D	ID=COSM1694415;OCCURENCE=1(skin)	.
chr4	68619935	68619935	G	A	exonic	GNRHR	gonadotropin releasing hormone receptor	nonsynonymous SNV	p.T40M	rs779496235	0	0	0	N	ID=COSM5060428;OCCURENCE=1(stomach)	.	[3H]NBI-49202; GOSERELIN; LEUPRORELIN ACETATE; ABARELIX; SUFUGOLIX; HISTRELIN; BUSERELIN; KLH-2109; [AC-D-2NAL1,D4CPA2,D-3PAL3,6,LEU8, D-ALA10]GNRH-II; GONADORELIN; [GLN8]GNRH; CMPD-1; GNRH I; [125I][DES-GLY10,D-ALA6]GNRH N-ETHYLAMIDE; CETRORELIX; [125I]GNRH I (HUMAN, MOUSE, RAT); NAFARELIN; D-23487; [TRP8]GNRH; [TYR8]GNRH; LEUPROLIDE; GANIRELIX ACETATE; ABARELIX; SUFUGOLIX; T-98475; HISTERELIN; …
chr4	71200973	71200973	G	A	exonic	CABS1	calcium binding protein, spermatid associated 1	nonsynonymous SNV	p.E73K		0	0	0	N	ID=COSM2830104;OCCURENCE=1(skin)	.
chr4	71472235	71472235	G	A	exonic	AMBN	ameloblastin	nonsynonymous SNV	p.V378I	rs76503327	0	0	0	N	ID=COSM5026159;OCCURENCE=1(breast)	.
chr4	75937766	75937766	G	A	exonic	PARM1	prostate androgen-regulated mucin-like protein 1	nonsynonymous SNV	p.G59S	rs754934644	0	0	0	N	ID=COSM5491815,COSM5491817,COSM5491816;OCCURENCE=1(biliary_tract)	.
chr4	79188413	79188413	C	T	exonic	FRAS1	Fraser extracellular matrix complex subunit 1	nonsynonymous SNV	p.R270C	rs773283272	0	0	0	D	ID=COSM2954088,COSM4343177,COSM2954089,COSM2954087;OCCURENCE=1(liver)	.
chr4	79350344	79350344	C	T	exonic	FRAS1	Fraser extracellular matrix complex subunit 1	nonsynonymous SNV	p.R1603W	rs961911715	0	0	0	N	ID=COSM4967104,COSM4967105,COSM4967103;OCCURENCE=1(central_nervous_system)	.
chr4	80328271	80328271	G	A	exonic	GK2	glycerol kinase 2	nonsynonymous SNV	p.P362S		0	0	0	D	ID=COSM6891919;OCCURENCE=1(skin)	.
chr4	80329126	80329126	C	T	exonic	GK2	glycerol kinase 2	nonsynonymous SNV	p.E77K	rs149134428	0	0	0	N	ID=COSM1058009;OCCURENCE=2(skin),1(large_intestine),2(endometrium)	.
chr4	83971134	83971134	A	G	exonic	COPS4	COP9 signalosome subunit 4	nonsynonymous SNV	p.Q136R		0	0	0	D	ID=COSM4927315;OCCURENCE=1(liver)	.
chr4	88535831	88535831	G	A	exonic	DSPP	dentin sialophosphoprotein	nonsynonymous SNV	p.D673N	rs200378069	0	0	0	D	ID=COSM4986129;OCCURENCE=3(soft_tissue),3(large_intestine)	.
chr4	88535832	88535832	A	G	exonic	DSPP	dentin sialophosphoprotein	nonsynonymous SNV	p.D673G	rs201553143	0	0	0	D	ID=COSM4590192;OCCURENCE=1(breast),3(soft_tissue),3(liver),1(upper_aerodigestive_tract),2(large_intestine)	.
chr4	88535868	88535868	A	G	exonic	DSPP	dentin sialophosphoprotein	nonsynonymous SNV	p.N685S	rs199719429	0	0	0	N	ID=COSM1633834;OCCURENCE=1(salivary_gland),3(liver),2(thyroid),2(large_intestine)	.
chr4	90856374	90856374	G	A	exonic	MMRN1	multimerin 1	nonsynonymous SNV	p.E515K		0	0	0	N	ID=COSM5401811;OCCURENCE=1(haematopoietic_and_lymphoid_tissue),1(skin)	.
chr4	96106260	96106260	G	A	exonic	UNC5C	unc-5 netrin receptor C	nonsynonymous SNV	p.R742C		0	0	0	N	ID=COSM5498893;OCCURENCE=1(biliary_tract)	.
chr4	96163682	96163682	G	A	exonic	UNC5C	unc-5 netrin receptor C	nonsynonymous SNV	p.R336C	rs768734972	0	0	0	D	ID=COSM6817026;OCCURENCE=1(large_intestine)	.
chr4	100062791	100062791	C	T	exonic	ADH4	alcohol dehydrogenase 4 (class II), pi polypeptide	nonsynonymous SNV	p.D74N	rs557732938	0	0	0	N	ID=COSM2951195;OCCURENCE=1(stomach)	.	ETHANOL
chr4	104037760	104037760	C	T	exonic	CENPE	centromere protein E	nonsynonymous SNV	p.M2472I		0	0	0	N	ID=COSM4946758,COSM74121;OCCURENCE=1(ovary)	.	GSK-923295; GSK-923295; GSK923295
chr4	108991878	108991878	G	A	exonic	LEF1	lymphoid enhancer binding factor 1	nonsynonymous SNV	p.R353W		0	0	0	D	ID=COSM3380777,COSM200871,COSM3380778;OCCURENCE=2(pancreas),1(large_intestine)	.
chr4	114251533	114251533	G	A	exonic	ANK2	ankyrin 2	nonsynonymous SNV	p.R1011H		0	0	0	N	ID=COSM1485616,COSM4121445;OCCURENCE=1(breast),1(stomach),1(oesophagus)	.
chr4	114279597	114279597	G	A	exonic	ANK2	ankyrin 2	nonsynonymous SNV	p.D3275N		0	0	0	D	ID=COSM1671224;OCCURENCE=1(NS),2(haematopoietic_and_lymphoid_tissue)	.
chr4	118005645	118005645	G	A	exonic	TRAM1L1	translocation associated membrane protein 1-like 1	nonsynonymous SNV	p.S302L	rs562701564	0	0	0	N	ID=COSM6807369;OCCURENCE=1(large_intestine)	.
chr4	123663357	123663357	C	T	exonic	BBS12	Bardet-Biedl syndrome 12	nonsynonymous SNV	p.H104Y		0	0	0	D	ID=COSM1694949;OCCURENCE=1(skin)	.
chr4	126369744	126369744	G	A	exonic	FAT4	FAT atypical cadherin 4	nonsynonymous SNV	p.A2525T	rs201007539	0	0	0	N	ID=COSM4829353,COSM4829354;OCCURENCE=1(prostate),1(cervix),1(large_intestine)	.
chr4	126389937	126389937	G	A	exonic	FAT4	FAT atypical cadherin 4	nonsynonymous SNV	p.G4057E		0	0	0	D	ID=COSM1694983,COSM1694982;OCCURENCE=1(skin)	.
chr4	140811265	140811265	G	A	exonic	MAML3	mastermind like transcriptional coactivator 3	nonsynonymous SNV	p.P442L	rs547610978	0	0	0	N	ID=COSM5216218,COSM447407,COSM447408;OCCURENCE=1(breast)	.
chr4	142640628	142640628	C	T	exonic	IL15	interleukin 15	nonsynonymous SNV	p.S4L	rs369804421	0	0	0	N	ID=COSM3600553;OCCURENCE=1(skin)	.	LYMPHOKINE-ACTIVATED KILLER CELLS; LEVODOPA; BCG; PMA; MEGESTROL ACETATE; CSA; AMG-714; MYCOPHENOLATE MOFETIL; LAK; CELL SURFACE ANTIGENS; CYCLOSPORIN; GLUCOCORTICOID; AMG0714; RAPAMYCIN; CD40L; AMG 714; IMMUNOLOGICAL ADJUVANT; AMG-714
chr4	143326406	143326406	G	A	exonic	INPP4B	inositol polyphosphate-4-phosphatase type II B	nonsynonymous SNV	p.P70S		1	0	0	N	ID=COSM5760252,COSM5760254,COSM5760253;OCCURENCE=1(bone)	.
chr4	152024138	152024138	A	C	exonic	RPS3A	ribosomal protein S3A	nonsynonymous SNV	p.Q157P	rs139979828	0	0	0	D	ID=COSM328158;OCCURENCE=1(breast),3(haematopoietic_and_lymphoid_tissue),4(pancreas),1(thyroid)	.
chr4	153332652	153332652	C	T	exonic	FBXW7	F-box and WD repeat domain containing 7	nonsynonymous SNV	p.E102K		1	0	0	N	ID=COSM6166816,COSM6166815;OCCURENCE=1(lung)	MTOR inhibitors, Tubulins	Docetaxel; Sirolimus; Sirolimus; Vorinostat; AR-42; Regorafenib; Temsirolimus; Entinostat; Belinostat; RAPAMYCIN (SIROLIMUS); MRK-003
chr4	155160361	155160361	G	T	exonic	DCHS2	dachsous cadherin-related 2	nonsynonymous SNV	p.L2030I		0	0	0	N	ID=COSM1052298;OCCURENCE=1(endometrium)	.
chr4	156763482	156763482	C	T	exonic	ASIC5	acid sensing ion channel subunit family member 5	nonsynonymous SNV	p.G296R		0	0	0	D	ID=COSM1695143;OCCURENCE=1(skin)	.
chr4	159052155	159052155	G	A	exonic	FAM198B	family with sequence similarity 198 member B	nonsynonymous SNV	p.R387C		0	0	0	D	ID=COSM6659269,COSM6659268;OCCURENCE=1(large_intestine)	.
chr4	160264339	160264339	G	A	exonic	RAPGEF2	Rap guanine nucleotide exchange factor 2	nonsynonymous SNV	p.E882K		0	0	0	D	ID=COSM257854;OCCURENCE=1(skin),2(large_intestine)	.
chr4	175899048	175899048	C	T	exonic	ADAM29	ADAM metallopeptidase domain 29	nonsynonymous SNV	p.T791M	rs151303907	0	0	0	N	ID=COSM5017954;OCCURENCE=1(soft_tissue)	.
chr4	177142720	177142720	G	A	exonic	ASB5	ankyrin repeat and SOCS box containing 5	nonsynonymous SNV	p.P139L	rs768506681	0	0	0	D	ID=COSM3602175;OCCURENCE=1(skin)	.
chr4	177608491	177608491	C	T	exonic	VEGFC	vascular endothelial growth factor C	nonsynonymous SNV	p.R332Q	rs755693482	0	0	0	N	ID=COSM3602184;OCCURENCE=1(skin)	.	BEVACIZUMAB; SORAFENIB TOSYLATE; ENDOSTATIN (84-114)-NH2 (JKC367); CONBERCEPT; LENALIDOMIDE
chr4	177608582	177608582	C	T	exonic	VEGFC	vascular endothelial growth factor C	nonsynonymous SNV	p.A302T		0	0	0	D	ID=COSM1618618;OCCURENCE=2(liver)	.	BEVACIZUMAB; SORAFENIB TOSYLATE; ENDOSTATIN (84-114)-NH2 (JKC367); CONBERCEPT; LENALIDOMIDE
chr4	184205524	184205524	G	A	exonic	WWC2	WW and C2 domain containing 2	nonsynonymous SNV	p.R1034Q	rs370673410	0	0	0	N	ID=COSM4741518,COSM4741517,COSM4741516;OCCURENCE=1(large_intestine)	.
chr4	184629699	184629699	G	A	exonic	TRAPPC11	trafficking protein particle complex 11	nonsynonymous SNV	p.R1110H	rs369105119	0	0	0		ID=COSM6807496;OCCURENCE=1(large_intestine)	.
chr4	186361716	186361716	G	A	exonic	C4orf47	chromosome 4 open reading frame 47	nonsynonymous SNV	p.R186H	rs1052774297	0	0	0	D	ID=COSM5418494;OCCURENCE=1(haematopoietic_and_lymphoid_tissue)	.
chr4	190864422	190864422	T	-	exonic	FRG1	FSHD region gene 1	frameshift deletion	p.I43fs	rs200806314	0	0	0		ID=COSM6029312;OCCURENCE=2(large_intestine)	.
chr4	190874255	190874255	A	T	exonic	FRG1	FSHD region gene 1	nonsynonymous SNV	p.T98S	rs17425201	0	0	0	N	ID=COSM225554;OCCURENCE=2(breast),2(haematopoietic_and_lymphoid_tissue),1(skin),1(prostate),4(large_intestine),5(central_nervous_system)	.
chr4	190876269	190876269	T	C	exonic	FRG1	FSHD region gene 1	nonsynonymous SNV	p.I132T	rs149113074	0	0	0	D	ID=COSM228976;OCCURENCE=1(stomach),1(haematopoietic_and_lymphoid_tissue),3(skin),1(thyroid),1(large_intestine)	.
chr4	190878577	190878577	A	G	exonic	FRG1	FSHD region gene 1	nonsynonymous SNV	p.N153D	rs75883191	0	0	0	D	ID=COSM447708;OCCURENCE=1(breast),2(haematopoietic_and_lymphoid_tissue),1(skin),2(thyroid)	.
chr5	155059	155059	G	A	exonic	PLEKHG4B	pleckstrin homology and RhoGEF domain containing G4B	nonsynonymous SNV	p.D332N	rs753020603	0	0	0	N	ID=COSM1064856;OCCURENCE=1(endometrium)	.
chr5	171512	171512	C	T	exonic	PLEKHG4B	pleckstrin homology and RhoGEF domain containing G4B	nonsynonymous SNV	p.R979C	rs746692078	0	0	0	D	ID=COSM4715656,COSM4715657;OCCURENCE=3(large_intestine)	.
chr5	840644	840644	G	C	exonic	ZDHHC11	zinc finger DHHC-type containing 11	nonsynonymous SNV	p.H250Q	rs200038670	0	0	0	N	ID=COSM739004,COSM739003;OCCURENCE=1(haematopoietic_and_lymphoid_tissue),1(stomach),3(pancreas),2(liver),1(skin),1(lung),2(large_intestine),1(biliary_tract)	.
chr5	1038481	1038481	C	T	exonic	NKD2	naked cuticle homolog 2	nonsynonymous SNV	p.P450L	rs757551288	0	0	0	N	ID=COSM6420064,COSM6420063;OCCURENCE=1(thyroid)	.
chr5	1219162	1219162	G	A	exonic	SLC6A19	solute carrier family 6 member 19	nonsynonymous SNV	p.V440I	rs373368788	0	0	0	N	ID=COSM4421308;OCCURENCE=1(pleura)	.	BENZATROPINE
chr5	1278806	1278806	C	T	exonic	TERT	telomerase reverse transcriptase	nonsynonymous SNV	p.V746M		0	1	0	D	ID=COSM3136379,COSM3136378;OCCURENCE=1(large_intestine)	.	RALOXIFENE; UO126; IMETELSTAT; ARSENIC TRIOXIDE; IMETELSTAT; V934/V935; BDNF; IMETELSTAT SODIUM; ANTISENSE OLIGONUCLEOTIDES; HOMOHARRINGTONINE; VEGF; GV1001
chr5	3596347	3596347	C	A	exonic	IRX1	iroquois homeobox 1	nonsynonymous SNV	p.P43Q		0	0	0	N	ID=COSM6512795;OCCURENCE=1(lung)	.
chr5	3599946	3599946	G	A	exonic	IRX1	iroquois homeobox 1	nonsynonymous SNV	p.R295H		0	0	0	N	ID=COSM3787055;OCCURENCE=1(pancreas)	.
chr5	5146321	5146321	G	A	exonic	ADAMTS16	ADAM metallopeptidase with thrombospondin type 1 motif 16	nonsynonymous SNV	p.R85Q	rs368411395	0	0	0	N	ID=COSM3616870,COSM3616871;OCCURENCE=2(skin)	.
chr5	5237172	5237172	C	T	exonic	ADAMTS16	ADAM metallopeptidase with thrombospondin type 1 motif 16	nonsynonymous SNV	p.S705L		0	0	0	D	ID=COSM4477028,COSM4477027;OCCURENCE=1(skin)	.
chr5	13871727	13871727	C	T	exonic	DNAH5	dynein axonemal heavy chain 5	nonsynonymous SNV	p.E1182K	rs868077328	0	0	0	N	ID=COSM1695451;OCCURENCE=6(skin)	.
chr5	13922340	13922340	G	A	exonic	DNAH5	dynein axonemal heavy chain 5	nonsynonymous SNV	p.T179M	rs747116308	0	0	0	N	ID=COSM3850553;OCCURENCE=1(stomach)	.
chr5	13922370	13922370	G	A	exonic	DNAH5	dynein axonemal heavy chain 5	nonsynonymous SNV	p.S169L	rs749078502	0	0	0	N	ID=COSM6512858;OCCURENCE=1(lung)	.
chr5	14359632	14359632	G	A	exonic	TRIO	trio Rho guanine nucleotide exchange factor	nonsynonymous SNV	p.A795T		0	0	0	N	ID=COSM1063689;OCCURENCE=1(endometrium)	.
chr5	14504593	14504593	G	A	exonic	TRIO	trio Rho guanine nucleotide exchange factor	nonsynonymous SNV	p.D2835N	rs768614002	0	0	0	N	ID=COSM3852389,COSM3209958;OCCURENCE=1(stomach)	.
chr5	14769291	14769291	G	A	exonic	ANKH	ANKH inorganic pyrophosphate transport regulator	nonsynonymous SNV	p.R36W	rs776057326	0	0	0	D	ID=COSM4661654;OCCURENCE=1(large_intestine)	.
chr5	15937257	15937257	C	T	exonic	FBXL7	F-box and leucine rich repeat protein 7	nonsynonymous SNV	p.R480C	rs576303242	0	0	0	N	ID=COSM181726;OCCURENCE=1(breast),1(stomach),2(large_intestine)	.
chr5	19483635	19483635	G	A	exonic	CDH18	cadherin 18	nonsynonymous SNV	p.R553W	rs760401743	0	0	0	D	ID=COSM4750788,COSM4750789;OCCURENCE=2(stomach),1(oesophagus)	.
chr5	23521208	23521208	G	T	exonic	PRDM9	PR/SET domain 9	nonsynonymous SNV	p.S143I		0	0	0	N	ID=COSM6170771;OCCURENCE=1(lung)	.
chr5	23527721	23527721	C	T	exonic	PRDM9	PR/SET domain 9	nonsynonymous SNV	p.R842C	rs201643800	0	0	0	N	ID=COSM3013881;OCCURENCE=1(breast),1(oesophagus),1(thyroid),1(upper_aerodigestive_tract)	.
chr5	24492981	24492981	T	A	exonic	CDH10	cadherin 10	nonsynonymous SNV	p.K523N		0	0	0	D	ID=COSM218844;OCCURENCE=1(stomach),2(pancreas)	.
chr5	31983427	31983427	C	T	exonic	PDZD2	PDZ domain containing 2	stopgain	p.R215X		0	0	0		ID=COSM1067258;OCCURENCE=1(endometrium)	.
chr5	32058185	32058185	G	A	exonic	PDZD2	PDZ domain containing 2	nonsynonymous SNV	p.V726I	rs140771130	0	0	0	N	ID=COSM4713446;OCCURENCE=2(large_intestine)	.
chr5	33637793	33637793	C	T	exonic	ADAMTS12	ADAM metallopeptidase with thrombospondin type 1 motif 12	nonsynonymous SNV	p.V593I	rs772795857	0	0	0	N	ID=COSM1181833;OCCURENCE=1(pancreas),1(large_intestine)	.
chr5	35072697	35072697	C	T	exonic	PRLR	prolactin receptor	nonsynonymous SNV	p.E175K	rs762980564	0	0	0	N	ID=COSM4347752,COSM4347753,COSM2686942;OCCURENCE=1(oesophagus),1(skin)	.	SOMATROPIN; DHT; CHORIOMAMMOTROPIN; SOMATROPIN RECOMBINANT; CHORIONIC SOMATOMAMMOTROPIN HORMONE-LIKE 1; LFA102
chr5	35740280	35740280	G	T	exonic	SPEF2	sperm flagellar 2	nonsynonymous SNV	p.V1081L		0	0	0	N	ID=COSM4141783;OCCURENCE=1(ovary)	.
chr5	35753768	35753768	G	A	exonic	SPEF2	sperm flagellar 2	nonsynonymous SNV	p.E1125K		0	0	0	N	ID=COSM5403368;OCCURENCE=1(skin)	.
chr5	38407203	38407203	C	T	exonic	EGFLAM	EGF like, fibronectin type III and laminin G domains	stopgain	p.R368X		0	0	0		ID=COSM3429438,COSM3429439;OCCURENCE=2(large_intestine),1(central_nervous_system)	.
chr5	38881818	38881818	C	T	exonic	OSMR	oncostatin M receptor	nonsynonymous SNV	p.P124S		0	0	0	N	ID=COSM3616218;OCCURENCE=1(skin)	.
chr5	38952304	38952304	G	A	exonic	RICTOR	RPTOR independent companion of MTOR complex 2	nonsynonymous SNV	p.P1041S		0	1	0	N	ID=COSM2689277,COSM2689278;OCCURENCE=1(large_intestine)	.	MLN0128; AZD2014; OSI-027; AZD8055
chr5	39119672	39119672	C	T	exonic	FYB		nonsynonymous SNV	p.E745K	rs267600622	0	0	0	N	ID=COSM5403473,COSM5403470,COSM5403471,COSM5403472;OCCURENCE=1(skin)	.
chr5	40854433	40854433	C	T	exonic	CARD6	caspase recruitment domain family member 6	nonsynonymous SNV	p.P1000L		0	0	0	D	ID=COSM14007;OCCURENCE=1(skin),1(lung)	.
chr5	41067278	41067278	C	T	exonic	MROH2B	maestro heat like repeat family member 2B	nonsynonymous SNV	p.D45N		0	0	0	N	ID=COSM3616583;OCCURENCE=1(skin)	.
chr5	50090983	50090983	G	A	exonic	PARP8	poly(ADP-ribose) polymerase family member 8	nonsynonymous SNV	p.R387Q	rs554189401	0	0	0	D	ID=COSM5536487;OCCURENCE=1(NS),1(lung)	.
chr5	57790557	57790557	G	A	exonic	GAPT	GRB2 binding adaptor protein, transmembrane	nonsynonymous SNV	p.R65H	rs148170353	0	0	0	N	ID=COSM1069128;OCCURENCE=1(endometrium)	.
chr5	64587290	64587290	G	A	exonic	ADAMTS6	ADAM metallopeptidase with thrombospondin type 1 motif 6	nonsynonymous SNV	p.R460C		0	0	0	N	ID=COSM3855870;OCCURENCE=1(stomach)	.
chr5	66396405	66396405	G	A	exonic	MAST4	microtubule associated serine/threonine kinase family member 4	nonsynonymous SNV	p.R355H		0	0	0	D	ID=COSM1438226,COSM5097539,COSM5097537,COSM5097538;OCCURENCE=1(large_intestine)	.
chr5	68682026	68682026	C	T	exonic	RAD17	RAD17 checkpoint clamp loader component	stopgain	p.R251X		0	0	0		ID=COSM284440;OCCURENCE=1(large_intestine)	.
chr5	71493006	71493006	G	A	exonic	MAP1B	microtubule associated protein 1B	nonsynonymous SNV	p.R1275H	rs372421201	0	0	0	N	ID=COSM1132127;OCCURENCE=1(stomach),1(prostate),1(cervix),1(large_intestine)	.
chr5	74655871	74655871	G	A	exonic	HMGCR	3-hydroxy-3-methylglutaryl-CoA reductase	nonsynonymous SNV	p.R840Q	rs755619444	0	0	0	D	ID=COSM170965;OCCURENCE=1(adrenal_gland),1(prostate),3(large_intestine)	.	COMPOUND 2F [PMID: 2153213]; SIMVASTATIN; ATORVASTATIN CALCIUM; FLUVASTATIN; FPYVAE PEPTIDE [PMID: 20494585]; COMPOUND 42 [PMID: 17574411]; COMPOUND 11JJ [PMID: 1656041]; ROSUVASTATIN CALCIUM; ROSUVASTATIN; COMPOUND 3 [DREYER ET AL., 1991]; PITAVASTATIN CALCIUM; COMPOUND 41 [PMID: 17574411]; STATINS; LOVASTATIN; COMPOUND 29 [PMID: 15686906]; FLUVASTATIN SODIUM; COMPOUND 4FF [PMID: 1656041]; LOVAS…
chr5	76028744	76028744	G	A	exonic	F2R	coagulation factor II thrombin receptor	nonsynonymous SNV	p.A232T		0	0	0	N	ID=COSM3074005;OCCURENCE=1(large_intestine)	.	RIGOSERTIB SODIUM; TYROSINE KINASE INHIBITOR; MORPHINE; TFLLR-NH2; ETHANOL; ATOPAXAR; VORAPAXAR SULFATE; WORTMANNIN; TRANSFORMING GROWTH FACTOR; [3H]HATRAP; LEPIRUDIN; VORAPAXAR; PROSTAGLANDIN E1; THALIDOMIDE; THROMBIN; BLEOMYCIN; RWJ-56110; F16357; KINASE INHIBITOR; GLUCOCORTICOID; VORAPAXAR; RUSALATIDE; ASPIRIN; DALTEPARIN; ATROPINE; ANTI-VEGF; ARGATROBAN; SCH-530348; ATOPAXAR
chr5	76704799	76704799	C	T	exonic	PDE8B	phosphodiesterase 8B	nonsynonymous SNV	p.R483W		0	0	0	D	ID=COSM5987957;OCCURENCE=1(salivary_gland),1(large_intestine)	.	PENTOXIFYLLINE; DIPYRIDAMOLE; DIPYRIDAMOLE; FLAVOXATE HYDROCHLORIDE
chr5	78181525	78181525	C	T	exonic	ARSB	arylsulfatase B	nonsynonymous SNV	p.V342M	rs749593643	0	0	0	D	ID=COSM6605266,COSM6605265;OCCURENCE=1(large_intestine)	.	ASCORBIC ACID
chr5	79854646	79854646	G	A	exonic	ANKRD34B	ankyrin repeat domain 34B	nonsynonymous SNV	p.S398L	rs373291448	0	0	0	N	ID=COSM5526674;OCCURENCE=1(NS)	.
chr5	85915176	85915176	C	T	exonic	COX7C	cytochrome c oxidase subunit 7C	nonsynonymous SNV	p.P28S		0	0	0		ID=COSM3410456;OCCURENCE=1(central_nervous_system)	.	IL-12
chr5	90136563	90136563	C	T	exonic	ADGRV1	adhesion G protein-coupled receptor V1	nonsynonymous SNV	p.R5594C	rs376062087	0	0	0	N	ID=COSM5517107;OCCURENCE=1(biliary_tract)	.
chr5	95278738	95278738	G	A	exonic	ELL2	elongation factor for RNA polymerase II 2	stopgain	p.R55X		0	0	0		ID=COSM1071422;OCCURENCE=1(stomach),1(skin),2(large_intestine),1(endometrium)	.
chr5	96514767	96514767	C	T	exonic	RIOK2	RIO kinase 2	nonsynonymous SNV	p.R66H	rs200929776	0	0	0	N	ID=COSM5759136,COSM5759137;OCCURENCE=1(bone)	.
chr5	101755576	101755576	G	A	exonic	SLCO6A1	solute carrier organic anion transporter family member 6A1	nonsynonymous SNV	p.R476C	rs186629200	0	0	0	D	ID=COSM1730914;OCCURENCE=1(liver)	.
chr5	102203032	102203032	G	A	exonic	PAM	peptidylglycine alpha-amidating monooxygenase	nonsynonymous SNV	p.V49I	rs2230458	0	0	0	N	ID=COSM2989736,COSM2989735;OCCURENCE=1(oesophagus)	.
chr5	111540159	111540159	C	T	exonic	EPB41L4A	erythrocyte membrane protein band 4.1 like 4A	nonsynonymous SNV	p.R430H	rs750489592	0	0	0	D	ID=COSM1205403,COSM1205402;OCCURENCE=2(large_intestine)	.
chr5	112151204	112151204	C	T	exonic	APC	APC, WNT signaling pathway regulator	stopgain	p.R283X	rs786201856	1	0	0		ID=COSM19679;OCCURENCE=45(large_intestine),1(biliary_tract)	WNT inhibitors	K-756; Ibuprofen; Sulindac; NC043; JW67; Leucovorin; DIFLUOROMETHYLORNITHINE; Niclosamide; iCRT-14; JW55; CCT031374; TRIIODOTHYRONINE; PKF118-310; Binimetinib; Trastuzumab; PKF115-584; JW74; G007-LK; CGP049090; CCT036477; Celecoxib; Dasatinib; Fluorouracil; HISTONE DEACETYLASE INHIBITOR; MF tricyclic; CCT070535; Vandetanib; Vantictumab; BEZ235; IWR-1; Vinorelbine; FH535; Pyrvinium; NSAID; TASIN-1…
chr5	112175069	112175069	C	T	exonic	APC	APC, WNT signaling pathway regulator	stopgain	p.Q1260X		1	0	0		ID=COSM256144;OCCURENCE=3(large_intestine)	WNT inhibitors	K-756; Ibuprofen; Sulindac; NC043; JW67; Leucovorin; DIFLUOROMETHYLORNITHINE; Niclosamide; iCRT-14; JW55; CCT031374; TRIIODOTHYRONINE; PKF118-310; Binimetinib; Trastuzumab; PKF115-584; JW74; G007-LK; CGP049090; CCT036477; Celecoxib; Dasatinib; Fluorouracil; HISTONE DEACETYLASE INHIBITOR; MF tricyclic; CCT070535; Vandetanib; Vantictumab; BEZ235; IWR-1; Vinorelbine; FH535; Pyrvinium; NSAID; TASIN-1…
chr5	112175212	112175216	AAAAG	-	exonic	APC	APC, WNT signaling pathway regulator	frameshift deletion	p.E1309fs	rs121913224	1	0	0		ID=COSM18764;OCCURENCE=1(stomach),69(large_intestine)	WNT inhibitors	K-756; Ibuprofen; Sulindac; NC043; JW67; Leucovorin; DIFLUOROMETHYLORNITHINE; Niclosamide; iCRT-14; JW55; CCT031374; TRIIODOTHYRONINE; PKF118-310; Binimetinib; Trastuzumab; PKF115-584; JW74; G007-LK; CGP049090; CCT036477; Celecoxib; Dasatinib; Fluorouracil; HISTONE DEACETYLASE INHIBITOR; MF tricyclic; CCT070535; Vandetanib; Vantictumab; BEZ235; IWR-1; Vinorelbine; FH535; Pyrvinium; NSAID; TASIN-1…
chr5	112175423	112175423	C	T	exonic	APC	APC, WNT signaling pathway regulator	stopgain	p.Q1378X	rs121913329	1	0	0		ID=COSM18862;OCCURENCE=5(stomach),1(kidney),61(large_intestine),1(small_intestine)	WNT inhibitors	K-756; Ibuprofen; Sulindac; NC043; JW67; Leucovorin; DIFLUOROMETHYLORNITHINE; Niclosamide; iCRT-14; JW55; CCT031374; TRIIODOTHYRONINE; PKF118-310; Binimetinib; Trastuzumab; PKF115-584; JW74; G007-LK; CGP049090; CCT036477; Celecoxib; Dasatinib; Fluorouracil; HISTONE DEACETYLASE INHIBITOR; MF tricyclic; CCT070535; Vandetanib; Vantictumab; BEZ235; IWR-1; Vinorelbine; FH535; Pyrvinium; NSAID; TASIN-1…
chr5	112175488	112175488	T	-	exonic	APC	APC, WNT signaling pathway regulator	frameshift deletion	p.S1400fs		1	0	0		ID=COSM4662393;OCCURENCE=2(large_intestine)	WNT inhibitors	K-756; Ibuprofen; Sulindac; NC043; JW67; Leucovorin; DIFLUOROMETHYLORNITHINE; Niclosamide; iCRT-14; JW55; CCT031374; TRIIODOTHYRONINE; PKF118-310; Binimetinib; Trastuzumab; PKF115-584; JW74; G007-LK; CGP049090; CCT036477; Celecoxib; Dasatinib; Fluorouracil; HISTONE DEACETYLASE INHIBITOR; MF tricyclic; CCT070535; Vandetanib; Vantictumab; BEZ235; IWR-1; Vinorelbine; FH535; Pyrvinium; NSAID; TASIN-1…
chr5	112175490	112175490	C	A	exonic	APC	APC, WNT signaling pathway regulator	stopgain	p.S1400X		1	0	0		ID=COSM19044;OCCURENCE=11(large_intestine)	WNT inhibitors	K-756; Ibuprofen; Sulindac; NC043; JW67; Leucovorin; DIFLUOROMETHYLORNITHINE; Niclosamide; iCRT-14; JW55; CCT031374; TRIIODOTHYRONINE; PKF118-310; Binimetinib; Trastuzumab; PKF115-584; JW74; G007-LK; CGP049090; CCT036477; Celecoxib; Dasatinib; Fluorouracil; HISTONE DEACETYLASE INHIBITOR; MF tricyclic; CCT070535; Vandetanib; Vantictumab; BEZ235; IWR-1; Vinorelbine; FH535; Pyrvinium; NSAID; TASIN-1…
chr5	112175639	112175639	C	T	exonic	APC	APC, WNT signaling pathway regulator	stopgain	p.R1450X	rs121913332	1	0	0		ID=COSM13127;OCCURENCE=2(NS),15(stomach),3(soft_tissue),3(pancreas),1(oesophagus),2(adrenal_gland),1(prostate),1(lung),259(large_intestine),7(small_intestine),2(endometrium)	WNT inhibitors	K-756; Ibuprofen; Sulindac; NC043; JW67; Leucovorin; DIFLUOROMETHYLORNITHINE; Niclosamide; iCRT-14; JW55; CCT031374; TRIIODOTHYRONINE; PKF118-310; Binimetinib; Trastuzumab; PKF115-584; JW74; G007-LK; CGP049090; CCT036477; Celecoxib; Dasatinib; Fluorouracil; HISTONE DEACETYLASE INHIBITOR; MF tricyclic; CCT070535; Vandetanib; Vantictumab; BEZ235; IWR-1; Vinorelbine; FH535; Pyrvinium; NSAID; TASIN-1…
chr5	112176021	112176021	A	-	exonic	APC	APC, WNT signaling pathway regulator	frameshift deletion	p.E1577fs		1	0	0		ID=COSM5613056;OCCURENCE=1(large_intestine)	WNT inhibitors	K-756; Ibuprofen; Sulindac; NC043; JW67; Leucovorin; DIFLUOROMETHYLORNITHINE; Niclosamide; iCRT-14; JW55; CCT031374; TRIIODOTHYRONINE; PKF118-310; Binimetinib; Trastuzumab; PKF115-584; JW74; G007-LK; CGP049090; CCT036477; Celecoxib; Dasatinib; Fluorouracil; HISTONE DEACETYLASE INHIBITOR; MF tricyclic; CCT070535; Vandetanib; Vantictumab; BEZ235; IWR-1; Vinorelbine; FH535; Pyrvinium; NSAID; TASIN-1…
chr5	112770260	112770260	C	T	exonic	TSSK1B	testis specific serine kinase 1B	nonsynonymous SNV	p.A93T	rs373083902	0	0	0	N	ID=COSM268098,COSM268099;OCCURENCE=1(skin),2(large_intestine)	.	CERITINIB
chr5	127704944	127704944	C	T	exonic	FBN2	fibrillin 2	nonsynonymous SNV	p.E727K		0	0	0	D	ID=COSM6101604,COSM6101605;OCCURENCE=1(lung)	.
chr5	131007941	131007941	T	-	exonic	FNIP1	folliculin interacting protein 1	frameshift deletion	p.K732fs		0	0	0		ID=COSM1252660;OCCURENCE=1(oesophagus),7(large_intestine)	.
chr5	131606705	131606705	G	A	exonic	PDLIM4	PDZ and LIM domain 4	nonsynonymous SNV	p.R142H	rs755408398	0	0	0	N	ID=COSM3850028;OCCURENCE=1(stomach)	.
chr5	137655063	137655063	C	T	exonic	CDC25C	cell division cycle 25C	nonsynonymous SNV	p.D154N		0	0	0	N	ID=COSM94049;OCCURENCE=1(lung)	.	CDDP; QUERCETIN; 5-FU
chr5	137803616	137803616	C	T	exonic	EGR1	early growth response 1	nonsynonymous SNV	p.P493L		0	0	0	N	ID=COSM1061394;OCCURENCE=1(endometrium)	.
chr5	139747429	139747429	G	A	exonic	SLC4A9	solute carrier family 4 member 9	nonsynonymous SNV	p.R791Q	rs370345203	0	0	0	D	ID=COSM5512152,COSM5512153,COSM5512151;OCCURENCE=1(biliary_tract)	.
chr5	140166536	140166536	G	A	exonic	PCDHA1	protocadherin alpha 1	nonsynonymous SNV	p.E221K		0	0	0	D	ID=COSM4555613,COSM4555612;OCCURENCE=1(skin)	.
chr5	140167353	140167353	C	T	exonic	PCDHA1	protocadherin alpha 1	nonsynonymous SNV	p.S493L		0	0	0	N	ID=COSM4467247,COSM4467246;OCCURENCE=1(skin)	.
chr5	140175217	140175217	C	T	exonic	PCDHA2	protocadherin alpha 2	nonsynonymous SNV	p.T223M		0	0	0	D	ID=COSM241068,COSM241069;OCCURENCE=1(oesophagus),1(prostate)	.
chr5	140188973	140188973	C	T	exonic	PCDHA4	protocadherin alpha 4	nonsynonymous SNV	p.P734L	rs782714901	0	0	0	D	ID=COSM5060681,COSM5060680;OCCURENCE=1(stomach)	.
chr5	140202966	140202966	G	A	exonic	PCDHA5	protocadherin alpha 5	nonsynonymous SNV	p.A536T	rs781942385	0	0	0	D	ID=COSM448751,COSM448752,COSM5178202;OCCURENCE=1(breast),1(large_intestine)	.
chr5	140207965	140207965	G	C	exonic	PCDHA6	protocadherin alpha 6	nonsynonymous SNV	p.G97R	rs150162226	0	0	0	N	ID=COSM1329072,COSM1329073;OCCURENCE=1(ovary),1(haematopoietic_and_lymphoid_tissue),1(pancreas),1(lung),1(thyroid)	.
chr5	140221306	140221306	C	T	exonic	PCDHA8	protocadherin alpha 8	nonsynonymous SNV	p.R134W	rs781816417	0	0	0	N	ID=COSM5647909,COSM5647908;OCCURENCE=1(oesophagus)	.
chr5	140250334	140250334	C	T	exonic	PCDHA11	protocadherin alpha 11	nonsynonymous SNV	p.T549M		0	0	0	N	ID=COSM1062321;OCCURENCE=1(endometrium)	.
chr5	140262152	140262152	C	T	exonic	PCDHA13	protocadherin alpha 13	nonsynonymous SNV	p.A100V		0	0	0	N	ID=COSM4983141;OCCURENCE=2(oesophagus)	.
chr5	140263706	140263706	C	T	exonic	PCDHA13	protocadherin alpha 13	nonsynonymous SNV	p.A618V		0	0	0	N	ID=COSM6739621;OCCURENCE=1(large_intestine)	.
chr5	140358537	140358537	C	T	exonic	PCDHA1;PCDHA10;PCDHA11;PCDHA12;PCDHA13;PCDHA2;PCDHA3;PCDHA4;PCDHA5;PCDHA6;PCDHA7;PCDHA8;PCDHA9;PCDHAC1;PCDHAC2	protocadherin alpha 1,protocadherin alpha 10,protocadherin alpha 11,protocadherin alpha 12,protocadherin alpha 13,protocadherin alpha 2,protocadherin alpha 3,protocadherin alpha 4,protocadherin alpha 5,protocadherin alpha 6,protocadherin alpha 7,protocadherin alpha 8,protocadherin alpha 9,protocadherin alpha subfamily C, 1,protocadherin alpha subfamily C, 2	stopgain	p.R800X	rs374951627	0	0	0		ID=COSM4762056,COSM4762062,COSM4762054,COSM4762065,COSM4762059,COSM4762053,COSM4762055,COSM4762057,COSM4762061,COSM4762066,COSM4762052,COSM4762064,COSM4762051,COSM4762058,COSM4762063,COSM4762060,COSM4762050;OCCURENCE=1(stomach)	.
chr5	140431240	140431240	G	A	exonic	PCDHB1	protocadherin beta 1	nonsynonymous SNV	p.R62H		0	0	0	D	ID=COSM5468091;OCCURENCE=1(large_intestine)	.
chr5	140474590	140474590	A	-	exonic	PCDHB2	protocadherin beta 2	frameshift deletion	p.M75fs	rs782086614	0	0	0		ID=COSM3241876;OCCURENCE=2(stomach),6(large_intestine),1(biliary_tract)	.
chr5	140474985	140474985	G	A	exonic	PCDHB2	protocadherin beta 2	nonsynonymous SNV	p.R204H		0	0	0	D	ID=COSM6053878;OCCURENCE=1(large_intestine)	.
chr5	140530550	140530550	G	A	exonic	PCDHB6	protocadherin beta 6	nonsynonymous SNV	p.V238I		0	0	0	N	ID=COSM218824;OCCURENCE=1(kidney),2(pancreas)	.
chr5	140590382	140590382	G	A	exonic	PCDHB12	protocadherin beta 12	nonsynonymous SNV	p.A635T	rs373006083	0	0	0	N	ID=COSM5773453;OCCURENCE=1(breast)	.
chr5	140683389	140683389	G	A	exonic	SLC25A2	solute carrier family 25 member 2	nonsynonymous SNV	p.A15V		0	0	0	D	ID=COSM448926;OCCURENCE=1(breast),3(large_intestine)	.
chr5	140720142	140720142	G	A	exonic	PCDHGA2	protocadherin gamma subfamily A, 2	nonsynonymous SNV	p.R535Q	rs116787237	0	0	0	N	ID=COSM1062993,COSM1062992;OCCURENCE=1(large_intestine),1(endometrium)	.
chr5	140725783	140725783	C	T	exonic	PCDHGA3	protocadherin gamma subfamily A, 3	nonsynonymous SNV	p.S728L		0	0	0	D	ID=COSM1486416,COSM5230525;OCCURENCE=1(breast),1(skin),1(large_intestine)	.
chr5	140744135	140744135	C	T	exonic	PCDHGA5	protocadherin gamma subfamily A, 5	stopgain	p.R80X		0	0	0		ID=COSM3851798,COSM3851799;OCCURENCE=1(stomach),1(large_intestine)	.
chr5	140745615	140745615	C	T	exonic	PCDHGA5	protocadherin gamma subfamily A, 5	nonsynonymous SNV	p.T573M		0	0	0	N	ID=COSM3784638,COSM1261450;OCCURENCE=1(breast),1(NS),1(stomach),1(pancreas)	.
chr5	140752045	140752045	C	T	exonic	PCDHGB3	protocadherin gamma subfamily B, 3	nonsynonymous SNV	p.A695V	rs548499010	0	0	0		ID=COSM3851866,COSM3851865;OCCURENCE=2(stomach),1(large_intestine)	.
chr5	143586348	143586348	C	T	exonic	KCTD16	potassium channel tetramerization domain containing 16	nonsynonymous SNV	p.P24L		0	0	0	N	ID=COSM5905623;OCCURENCE=1(skin)	.
chr5	145252378	145252378	T	A	exonic	GRXCR2	glutaredoxin and cysteine rich domain containing 2	nonsynonymous SNV	p.S52C		0	0	0	N	ID=COSM5805046;OCCURENCE=2(liver)	.
chr5	145252473	145252473	C	T	exonic	GRXCR2	glutaredoxin and cysteine rich domain containing 2	nonsynonymous SNV	p.R20Q		0	0	0	D	ID=COSM4553752;OCCURENCE=1(skin),1(large_intestine)	.
chr5	149497322	149497322	C	T	exonic	PDGFRB	platelet derived growth factor receptor beta	nonsynonymous SNV	p.R999Q	rs987244289	0	1	0	N	ID=COSM5609803;OCCURENCE=1(skin)	Imatininb	QUIZARTINIB; PAZOPANIB; CEDIRANIB; PD166285; MK-2461; SORAFENIB; Imatinib; CRENOLANIB; CEDIRANIB; IMATINIB MESYLATE; CM-082; MASITINIB; NINTEDANIB ESYLATE; DASATINIB; NINTEDANIB; TELATINIB; MOTESANIB; AC710; SUNITINIB; SU-014813; ENMD-981693; TG100-801; SORAFENIB TOSYLATE; DOVITINIB; TANDUTINIB; XL-999; NINTEDANIB; LUCITANIB; E-10030; SORAFENIB; REGORAFENIB; BECAPLERMIN; REGORAFENIB; NINTEDANIB; …	All Tumors,EL:4:Nilotinib, Imatinib, Ponatinib(24359404, 26455322)
chr5	149513304	149513304	G	A	exonic	PDGFRB	platelet derived growth factor receptor beta	nonsynonymous SNV	p.P260L	rs753192549	0	1	0	N	ID=COSM6743160;OCCURENCE=1(large_intestine)	Imatininb	QUIZARTINIB; PAZOPANIB; CEDIRANIB; PD166285; MK-2461; SORAFENIB; Imatinib; CRENOLANIB; CEDIRANIB; IMATINIB MESYLATE; CM-082; MASITINIB; NINTEDANIB ESYLATE; DASATINIB; NINTEDANIB; TELATINIB; MOTESANIB; AC710; SUNITINIB; SU-014813; ENMD-981693; TG100-801; SORAFENIB TOSYLATE; DOVITINIB; TANDUTINIB; XL-999; NINTEDANIB; LUCITANIB; E-10030; SORAFENIB; REGORAFENIB; BECAPLERMIN; REGORAFENIB; NINTEDANIB; …	All Tumors,EL:4:Nilotinib, Imatinib, Ponatinib(24359404, 26455322)
chr5	151183536	151183536	C	T	exonic	G3BP1	G3BP stress granule assembly factor 1	nonsynonymous SNV	p.R429W	rs759164636	0	0	0	D	ID=COSM5956028;OCCURENCE=1(upper_aerodigestive_tract)	.
chr5	153026613	153026613	G	A	exonic	GRIA1	glutamate ionotropic receptor AMPA type subunit 1	nonsynonymous SNV	p.D126N		0	0	0	N	ID=COSM3612791,COSM3612792;OCCURENCE=1(skin)	.	ZONAMPANEL; CX516; HALOPERIDOL; MIBAMPATOR; Selurampanel; MK-8777; SEVOFLURANE; ENFLURANE; BFGF; BECAMPANEL; SALINE; PIRACETAM; LY392098; GYKI53784; LY404187; CX717; DESFLURANE; (S)-5-FLUOROWILLARDIINE; CX1632/S 47445; S18986; [3H]CNQX; AMPA; TEZAMPANEL; DESFLURANE; PF-04958242; IDRA-21; BGG-492; CX1739; [3H]AMPA; FARAMPATOR; ISOFLURANE; ANESTHETICS; ARGIOTOXIN; DASOLAMPANEL; ATPO; PERAMPANEL; FA…
chr5	156819961	156819961	C	T	exonic	CYFIP2	cytoplasmic FMR1 interacting protein 2	nonsynonymous SNV	p.R1264C	rs371399881	0	0	0	N	ID=COSM1435571,COSM5830092,COSM1435569,COSM1435570;OCCURENCE=1(large_intestine)	.
chr5	160061403	160061403	G	A	exonic	ATP10B	ATPase phospholipid transporting 10B (putative)	nonsynonymous SNV	p.R447C	rs753653420	0	0	0	D	ID=COSM250767;OCCURENCE=1(soft_tissue),2(liver)	.
chr5	161324208	161324208	C	T	exonic	GABRA1	gamma-aminobutyric acid type A receptor alpha1 subunit	nonsynonymous SNV	p.P384L	rs755336024	0	0	0	D	ID=COSM3410086;OCCURENCE=1(central_nervous_system)	.	CLONAZEPAM; CLORAZEPATE; THIAMYLAL SODIUM; BUTALBITAL; CNS-7056; ISOFLURANE; METHYPRYLON; ADINAZOLAM; TOPIRAMATE; METHYPRYLON; GABAZINE; CLOBAZAM; NG2-73; DESFLURANE; CLONAZEPAM; MIDAZOLAM; HALAZEPAM; MIDAZOLAM HYDROCHLORIDE; METHYLPHENOBARBITAL; ETOMIDATE; QUAZEPAM; MEPROBAMATE; TALBUTAL; ESZOPICLONE; TBPS; ETOMIDATE; CLOTIAZEPAM; INDIPLON; SEVOFLURANE; PENTOBARBITAL; THIAMYLAL; PIPERIDINE-4-SUL…
chr5	161524813	161524813	C	A	exonic	GABRG2	gamma-aminobutyric acid type A receptor gamma2 subunit	nonsynonymous SNV	p.P166H		0	0	0	D	ID=COSM6103109;OCCURENCE=2(lung)	.	ZALEPLON; HALAZEPAM; FLURAZEPAM HYDROCHLORIDE; SECOBARBITAL SODIUM; PROPOFOL; BROMAZEPAM; THIOPENTAL SODIUM; DESFLURANE; ALPRAZOLAM; PENTOBARBITAL SODIUM; CLONAZEPAM; ZOLPIDEM TARTRATE; QUAZEPAM; SEVOFLURANE; FLURAZEPAM; OXAZEPAM; METHARBITAL; PENTOBARBITAL; NITRAZEPAM; METHYPRYLON; FLUMAZENIL; ALPRAZOLAM; HALOTHANE; CLOBAZAM; QUAZEPAM; CLOTIAZEPAM; OXAZEPAM; CLORAZEPATE DIPOTASSIUM; TRICLOFOS SO…
chr5	168271614	168271614	G	A	exonic	SLIT3	slit guidance ligand 3	stopgain	p.R178X	rs758788044	0	0	0		ID=COSM1696713;OCCURENCE=1(skin)	.
chr5	169309983	169309983	C	T	exonic	FAM196B	family with sequence similarity 196 member B	nonsynonymous SNV	p.R307Q	rs542645445	0	0	0	N	ID=COSM4562313;OCCURENCE=1(skin)	.
chr5	171821625	171821625	C	T	exonic	SH3PXD2B	SH3 and PX domains 2B	nonsynonymous SNV	p.R84Q		0	0	0	N	ID=COSM1065860;OCCURENCE=1(endometrium)	.
chr5	172590881	172590881	C	T	exonic	BNIP1	BCL2 interacting protein 1	nonsynonymous SNV	p.T258M	rs766708503	0	0	0	N	ID=COSM6612180;OCCURENCE=1(large_intestine)	.
chr5	175665522	175665522	T	A	exonic	SIMC1	SUMO interacting motifs containing 1	nonsynonymous SNV	p.F4Y	rs866802577	0	0	0	N	ID=COSM6233693;OCCURENCE=4(liver),1(lung),2(thyroid)	.
chr5	175811366	175811366	G	A	exonic	NOP16	NOP16 nucleolar protein	nonsynonymous SNV	p.R130C	rs759109610	0	0	0	D	ID=COSM1310987,COSM1310988;OCCURENCE=1(urinary_tract)	.
chr5	176056601	176056601	C	T	exonic	SNCB	synuclein beta	nonsynonymous SNV	p.A19T	rs958646435	0	0	0	D	ID=COSM304733;OCCURENCE=1(breast),1(large_intestine)	.
chr5	176309060	176309060	G	A	exonic	HK3	hexokinase 3	nonsynonymous SNV	p.R708C	rs532202824	0	0	0	D	ID=COSM4412213,COSM4412212;OCCURENCE=1(oesophagus)	.
chr5	176524306	176524306	C	T	exonic	FGFR4	fibroblast growth factor receptor 4	nonsynonymous SNV	p.R723C	rs201490532	0	1	0	D	ID=COSM1436251,COSM1436250;OCCURENCE=2(large_intestine)	.	BGJ398; DOVITINIB; AZD4547; CVBT-141H; CVBT-141B; ENMD-2076; PALIFERMIN; PALIFERMIN; BRIVANIB; ARQ-087; FP-1039; LY-2874455; FGF/VEGF RECEPTOR TYROSINE KINASE INHIBITOR, PD173074; BGJ-398; INFIGRATINIB; ACTB1003; LY2874455; FGF401; ERDAFITINIB; FGF-6; XL-999; CP-459632; BAY-1163877; BRIVANIB ALANINATE; ISIS-FGFR4; NINTEDANIB; DOVITINIB; ENMD-981693; TRAFERMIN; NINTEDANIB ESYLATE; NINTEDANIB; AZD-…
chr5	176860185	176860185	G	A	exonic	GRK6	G protein-coupled receptor kinase 6	nonsynonymous SNV	p.D160N	rs760288504	0	0	0	N	ID=COSM6675780,COSM6675781,COSM6675779;OCCURENCE=1(large_intestine)	.	BALANOL
chr5	177422915	177422915	C	T	exonic	PROP1	PROP paired-like homeobox 1	nonsynonymous SNV	p.R7H	rs748484817	0	0	0	N	ID=COSM208300;OCCURENCE=1(haematopoietic_and_lymphoid_tissue),1(large_intestine)	.
chr5	179264563	179264563	C	T	exonic	MRNIP	MRN complex interacting protein	nonsynonymous SNV	p.R287Q	rs767842607	0	0	0	N	ID=COSM4667843;OCCURENCE=2(large_intestine)	.
chr6	394890	394890	C	T	exonic	IRF4	interferon regulatory factor 4	nonsynonymous SNV	p.R96C		0	0	0	D	ID=COSM1173222;OCCURENCE=1(stomach),1(oesophagus),1(large_intestine)	.
chr6	1394981	1394981	G	T	exonic	FOXF2	forkhead box F2	nonsynonymous SNV	p.D408Y		0	0	0	D	ID=COSM178153;OCCURENCE=2(large_intestine)	.
chr6	3010309	3010309	G	A	exonic	NQO2	N-ribosyldihydronicotinamide:quinone reductase 2	nonsynonymous SNV	p.G20R	rs777483868	0	0	0	N	ID=COSM1077307;OCCURENCE=1(endometrium)	.	MENADIONE; CARICOTAMIDE
chr6	6222398	6222398	C	T	exonic	F13A1	coagulation factor XIII A chain	nonsynonymous SNV	p.R327Q	rs121913072	0	0	0	D	ID=COSM5871003;OCCURENCE=1(NS)	.
chr6	13365181	13365181	G	A	exonic	GFOD1	glucose-fructose oxidoreductase domain containing 1	nonsynonymous SNV	p.R323W	rs776190532	0	0	0	N	ID=COSM5709863;OCCURENCE=1(haematopoietic_and_lymphoid_tissue),1(lung)	.
chr6	15513156	15513156	G	A	exonic	JARID2	jumonji and AT-rich interaction domain containing 2	nonsynonymous SNV	p.R1049H		0	0	0	N	ID=COSM6689474;OCCURENCE=1(large_intestine)	.
chr6	16327864	16327864	-	TGC	exonic	ATXN1	ataxin 1	nonframeshift insertion	p.H226delinsQH	rs765686161	0	0	0		ID=COSM4992661;OCCURENCE=4(NS),1(stomach),1(oesophagus),2(skin),2(thyroid),1(upper_aerodigestive_tract),12(large_intestine)	.
chr6	16327921	16327921	C	A	exonic	ATXN1	ataxin 1	nonsynonymous SNV	p.Q207H	rs201030692	0	0	0	N	ID=COSM243137;OCCURENCE=1(salivary_gland),1(haematopoietic_and_lymphoid_tissue),1(kidney),3(pancreas),5(skin),3(prostate),2(thyroid),2(upper_aerodigestive_tract),8(large_intestine)	.
chr6	17514163	17514163	C	T	exonic	CAP2	cyclase associated actin cytoskeleton regulatory protein 2	nonsynonymous SNV	p.T205M	rs145067625	0	0	0	D	ID=COSM4445046;OCCURENCE=1(large_intestine)	.
chr6	17837152	17837152	C	T	exonic	KIF13A	kinesin family member 13A	nonsynonymous SNV	p.R371Q	rs781564779	0	0	0	D	ID=COSM3860655,COSM3860656,COSM3860657;OCCURENCE=1(stomach),1(haematopoietic_and_lymphoid_tissue)	.
chr6	24936108	24936108	C	A	exonic	RIPOR2	RHO family interacting cell polarization regulator 2	stopgain	p.E7X		0	0	0		ID=COSM4160424;OCCURENCE=1(thyroid)	.
chr6	25862652	25862652	G	A	exonic	SLC17A3	solute carrier family 17 member 3	nonsynonymous SNV	p.R38C	rs115225744	0	0	0	D	ID=COSM1442555,COSM1442554;OCCURENCE=1(large_intestine)	.
chr6	26027471	26027471	G	A	exonic	HIST1H4B	histone cluster 1 H4 family member b	nonsynonymous SNV	p.R4C	rs774444664	0	0	0		ID=COSM1662143;OCCURENCE=1(kidney)	.
chr6	29910797	29910797	G	T	exonic	HLA-A	major histocompatibility complex, class I, A	stopgain	p.E113X	rs41559912	1	0	0		ID=COSM4353745,COSM3250918;OCCURENCE=2(cervix),1(upper_aerodigestive_tract)	.	COBALT; Carbamazepine; GLUCOCORTICOID; PMCV
chr6	33660616	33660616	C	T	exonic	ITPR3	inositol 1,4,5-trisphosphate receptor type 3	nonsynonymous SNV	p.R2524C		0	0	0	D	ID=COSM1443895,COSM1443896;OCCURENCE=2(stomach),1(pancreas),1(oesophagus),4(large_intestine)	.	DECAVANADATE; IP3; CA2+
chr6	33662732	33662732	G	A	exonic	ITPR3	inositol 1,4,5-trisphosphate receptor type 3	nonsynonymous SNV	p.R2606Q	rs148037665	0	0	0	N	ID=COSM161812,COSM4693615;OCCURENCE=1(breast),2(large_intestine)	.	DECAVANADATE; IP3; CA2+
chr6	35048832	35048832	G	A	exonic	ANKS1A	ankyrin repeat and sterile alpha motif domain containing 1A	nonsynonymous SNV	p.R869Q	rs769104342	0	0	0	N	ID=COSM1243079,COSM1243080;OCCURENCE=1(oesophagus)	.
chr6	36020539	36020539	G	T	exonic	MAPK14	mitogen-activated protein kinase 14	nonsynonymous SNV	p.Q60H		0	0	0	N	ID=COSM6313484,COSM6313483;OCCURENCE=1(liver)	.	TALMAPIMOD; SB220025; AMG-548; SC-80036; VX-702; PF-03715455; SEMAPIMOD; R-1487; RWJ-67657; AZD-6703; IL-2; ACUMAPIMOD; TALMAPIMOD; SB203580; PG-760564; TA-5493; SCIO-323; LITHIUM; SB-681323; COMPOUND 12 [PMID: 22521646]; ARRY-614; KC706; BMS-582949; RALIMETINIB; GSK610677; LOSMAPIMOD; ANTI-CD20 ANTIBODY; SEMAPIMOD; RALIMETINIB; SKF-86002; DILMAPIMOD; DILMAPIMOD; PF-670462; Ro-3201195; MORPHINE; …
chr6	36263162	36263162	C	T	exonic	PNPLA1	patatin like phospholipase domain containing 1	stopgain	p.R247X	rs777268917	0	0	0		ID=COSM6751426,COSM6751425,COSM6751427;OCCURENCE=1(large_intestine)	.
chr6	36339205	36339205	G	A	exonic	ETV7	ETS variant 7	nonsynonymous SNV	p.S189F		0	0	0	N	ID=COSM4500477;OCCURENCE=1(skin)	.
chr6	36446990	36446990	G	A	exonic	KCTD20	potassium channel tetramerization domain containing 20	nonsynonymous SNV	p.R176H	rs967542866	0	0	0	D	ID=COSM1672349;OCCURENCE=1(haematopoietic_and_lymphoid_tissue)	.
chr6	36930927	36930927	C	T	exonic	PI16	peptidase inhibitor 16	nonsynonymous SNV	p.T270M		0	0	0	N	ID=COSM1078586;OCCURENCE=1(endometrium)	.
chr6	36982774	36982774	C	T	exonic	FGD2	FYVE, RhoGEF and PH domain containing 2	nonsynonymous SNV	p.S330F	rs758759895	0	0	0	D	ID=COSM3626319;OCCURENCE=1(skin)	.
chr6	38142862	38142862	C	T	exonic	BTBD9	BTB domain containing 9	nonsynonymous SNV	p.G580S		0	0	0	N	ID=COSM4666361,COSM4666362;OCCURENCE=1(large_intestine)	.
chr6	38312841	38312841	T	C	exonic	BTBD9	BTB domain containing 9	nonsynonymous SNV	p.T395A		0	0	0	D	ID=COSM3626443,COSM3626442;OCCURENCE=1(skin)	.
chr6	38702357	38702357	C	T	exonic	DNAH8	dynein axonemal heavy chain 8	nonsynonymous SNV	p.R228C	rs145773185	0	0	0	N	ID=COSM3626488,COSM3626489,COSM3626490;OCCURENCE=1(skin)	.
chr6	38906635	38906635	G	A	exonic	DNAH8	dynein axonemal heavy chain 8	nonsynonymous SNV	p.E3948K	rs940769485	0	0	0	N	ID=COSM1697148,COSM1697147;OCCURENCE=1(skin)	.
chr6	38980407	38980407	C	T	exonic	DNAH8	dynein axonemal heavy chain 8	nonsynonymous SNV	p.P4558S		0	0	0	D	ID=COSM4465177,COSM4465176;OCCURENCE=1(skin)	.
chr6	40399690	40399690	C	T	exonic	LRFN2	leucine rich repeat and fibronectin type III domain containing 2	nonsynonymous SNV	p.R388H	rs148386118	0	0	0	N	ID=COSM3873907;OCCURENCE=1(stomach),1(haematopoietic_and_lymphoid_tissue)	.
chr6	41743247	41743247	C	T	exonic	FRS3	fibroblast growth factor receptor substrate 3	nonsynonymous SNV	p.V55I	rs200285392	0	0	0	N	ID=COSM1079250;OCCURENCE=1(endometrium)	.
chr6	41766656	41766656	C	T	exonic	USP49	ubiquitin specific peptidase 49	nonsynonymous SNV	p.R561H	rs761753890	0	0	0	N	ID=COSM4654106,COSM4654107;OCCURENCE=1(large_intestine)	.
chr6	44233400	44233400	C	T	exonic	NFKBIE	NFKB inhibitor epsilon	nonsynonymous SNV	p.G34E		0	0	0	N	ID=COSM5545402;OCCURENCE=1(NS),9(skin)	.
chr6	46826170	46826170	G	A	exonic	ADGRF5	adhesion G protein-coupled receptor F5	nonsynonymous SNV	p.T1157M	rs141322343	0	0	0	N	ID=COSM2153023;OCCURENCE=1(stomach),2(central_nervous_system)	.
chr6	49583459	49583459	G	A	exonic	RHAG	Rh associated glycoprotein	nonsynonymous SNV	p.T173M		0	0	0	D	ID=COSM1731457;OCCURENCE=1(liver),3(large_intestine)	.
chr6	50807910	50807910	G	A	exonic	TFAP2B	transcription factor AP-2 beta	nonsynonymous SNV	p.E337K		0	0	0	D	ID=COSM1080135;OCCURENCE=1(endometrium)	.
chr6	51491828	51491828	C	T	exonic	PKHD1	PKHD1, fibrocystin/polyductin	nonsynonymous SNV	p.G3918R		0	0	0	N	ID=COSM3354367;OCCURENCE=2(large_intestine)	.
chr6	51944748	51944748	G	T	exonic	PKHD1	PKHD1, fibrocystin/polyductin	nonsynonymous SNV	p.Q114K		0	0	0	D	ID=COSM3949328,COSM3949329;OCCURENCE=1(lung)	.
chr6	52761651	52761651	C	T	exonic	GSTA3	glutathione S-transferase alpha 3	nonsynonymous SNV	p.A208T	rs45620832	0	0	0	N	ID=COSM4004079;OCCURENCE=1(haematopoietic_and_lymphoid_tissue)	.
chr6	54212284	54212284	G	A	exonic	TINAG	tubulointerstitial nephritis antigen	nonsynonymous SNV	p.D290N	rs773073432	0	0	0	D	ID=COSM1080382;OCCURENCE=1(NS),1(endometrium)	.
chr6	70951148	70951148	C	T	exonic	COL9A1	collagen type IX alpha 1 chain	nonsynonymous SNV	p.G670S	rs778543412	0	0	0	D	ID=COSM333053;OCCURENCE=1(lung)	.
chr6	72011310	72011310	C	T	exonic	OGFRL1	opioid growth factor receptor like 1	nonsynonymous SNV	p.T305M	rs373599406	0	0	0	N	ID=COSM1672556;OCCURENCE=4(large_intestine)	.
chr6	73110409	73110409	G	A	exonic	RIMS1	regulating synaptic membrane exocytosis 1	nonsynonymous SNV	p.R1691Q	rs749878015	0	0	0	D	ID=COSM3161971;OCCURENCE=1(skin),1(lung)	.
chr6	74073369	74073369	G	A	exonic	KHDC3L	KH domain containing 3 like, subcortical maternal complex member	nonsynonymous SNV	p.R147H		0	0	0	N	ID=COSM4172428;OCCURENCE=1(haematopoietic_and_lymphoid_tissue)	.
chr6	74073405	74073405	C	T	exonic	KHDC3L	KH domain containing 3 like, subcortical maternal complex member	nonsynonymous SNV	p.S159L		0	0	0	N	ID=COSM3162267;OCCURENCE=1(large_intestine)	.
chr6	75841736	75841736	G	A	exonic	COL12A1	collagen type XII alpha 1 chain	nonsynonymous SNV	p.R1953C	rs777948762	0	0	0	D	ID=COSM6107740;OCCURENCE=1(lung)	.
chr6	84269854	84269854	G	A	exonic	SNAP91	synaptosome associated protein 91	nonsynonymous SNV	p.P867L		0	0	0	N	ID=COSM3176702,COSM3176701;OCCURENCE=1(skin)	.
chr6	87968115	87968115	C	T	exonic	ZNF292	zinc finger protein 292	nonsynonymous SNV	p.P1590S	rs911481136	0	0	0	N	ID=COSM3630374,COSM3630373;OCCURENCE=2(skin)	.
chr6	88768502	88768502	C	A	exonic	SPACA1	sperm acrosome associated 1	nonsynonymous SNV	p.R146S	rs368572755	0	0	0	N	ID=COSM1266528;OCCURENCE=1(oesophagus)	.
chr6	89563379	89563379	C	T	exonic	RNGTT	RNA guanylyltransferase and 5'-phosphatase	nonsynonymous SNV	p.R334H	rs781242185	0	0	0	N	ID=COSM3177975,COSM3928656;OCCURENCE=1(central_nervous_system)	.
chr6	90556336	90556336	G	T	exonic	CASP8AP2	caspase 8 associated protein 2	stopgain	p.G10X		0	0	0		ID=COSM6284137;OCCURENCE=1(liver)	.
chr6	100368893	100368893	G	A	exonic	MCHR2	melanin concentrating hormone receptor 2	nonsynonymous SNV	p.R316C	rs770305974	0	0	0	N	ID=COSM1578576;OCCURENCE=1(meninges)	.	ATC0065; MCH (SALMON); AC-HMCH-(6-16)-NH2; COMPOUND 38 [PMID: 22123324]; MELANIN-CONCENTRATING HORMONE; [AVA9,10,AVA14,15]-AC-HMCH6-16-NH2; [PHE13,TYR19]MCH
chr6	106553770	106553770	G	A	exonic	PRDM1	PR/SET domain 1	nonsynonymous SNV	p.V579I		0	0	0	N	ID=COSM3857243,COSM3857244;OCCURENCE=1(stomach)	.
chr6	108214755	108214755	T	-	exonic	SEC63	SEC63 homolog, protein translocation regulator	frameshift deletion	p.K535fs	rs752868449	0	0	0		ID=COSM111632;OCCURENCE=1(ovary),6(stomach),1(peritoneum),1(oesophagus),1(upper_aerodigestive_tract),19(large_intestine)	.
chr6	108985176	108985176	-	G	exonic	FOXO3	forkhead box O3	frameshift insertion	p.D380fs	rs34133353	0	0	0		ID=COSM5957204;OCCURENCE=1(thyroid)	.
chr6	109854548	109854548	C	T	exonic	AK9	adenylate kinase 9	nonsynonymous SNV	p.R1159H	rs774061625	0	0	0	D	ID=COSM3975716,COSM3975718,COSM3975717;OCCURENCE=1(kidney),1(central_nervous_system)	.
chr6	111697523	111697523	T	C	exonic	REV3L	REV3 like, DNA directed polymerase zeta catalytic subunit	nonsynonymous SNV	p.T679A		0	0	0	N	ID=COSM6104876,COSM6104877;OCCURENCE=1(lung)	.
chr6	111710356	111710356	C	T	exonic	REV3L	REV3 like, DNA directed polymerase zeta catalytic subunit	nonsynonymous SNV	p.R272Q	rs761349313	0	0	0	N	ID=COSM6278993,COSM6278992;OCCURENCE=1(liver)	.
chr6	118015332	118015332	C	G	exonic	NUS1	NUS1 dehydrodolichyl diphosphate synthase subunit	nonsynonymous SNV	p.A227G	rs76776814	0	0	0	N	ID=COSM4006109;OCCURENCE=3(breast),1(urinary_tract),1(liver),3(thyroid)	.
chr6	121768819	121768819	G	A	exonic	GJA1	gap junction protein alpha 1	nonsynonymous SNV	p.A276T	rs774210184	0	0	0	D	ID=COSM1620841;OCCURENCE=2(liver),2(large_intestine)	.	BLEOMYCIN; CARVEDILOL; CA2+; PROTEASE INHIBITOR; PROTEASOME INHIBITOR; CARBENOXOLONE; EGCG; PROPYLTHIOURACIL; VITAMIN C; LABETALOL; OCTANOL; FLUFENAMIC ACID; ATENOLOL; VITAMIN A; SELENIUM
chr6	121768925	121768925	C	-	exonic	GJA1	gap junction protein alpha 1	frameshift deletion	p.A311fs	rs778110855	0	0	0		ID=COSM4776155;OCCURENCE=1(soft_tissue)	.	BLEOMYCIN; CARVEDILOL; CA2+; PROTEASE INHIBITOR; PROTEASOME INHIBITOR; CARBENOXOLONE; EGCG; PROPYLTHIOURACIL; VITAMIN C; LABETALOL; OCTANOL; FLUFENAMIC ACID; ATENOLOL; VITAMIN A; SELENIUM
chr6	123658803	123658803	C	T	exonic	TRDN	triadin	nonsynonymous SNV	p.E461K		0	0	0	N	ID=COSM6425476;OCCURENCE=1(thyroid)	.
chr6	127767812	127767812	G	A	exonic	KIAA0408	KIAA0408	nonsynonymous SNV	p.P551L	rs767969756	0	0	0	D	ID=COSM6200828;OCCURENCE=1(stomach)	.
chr6	128540178	128540178	C	T	exonic	PTPRK	protein tyrosine phosphatase, receptor type K	nonsynonymous SNV	p.A253T		0	0	0	N	ID=COSM1595801,COSM4350034,COSM203623;OCCURENCE=1(endometrium)	.
chr6	132910503	132910503	C	T	exonic	TAAR5	trace amine associated receptor 5	nonsynonymous SNV	p.R108H	rs372095515	0	0	0	D	ID=COSM4966302;OCCURENCE=1(prostate)	.
chr6	135679284	135679284	C	G	exonic	AHI1	Abelson helper integration site 1	nonsynonymous SNV	p.D1051H		0	0	0	D	ID=COSM1311586;OCCURENCE=1(urinary_tract)	.
chr6	136599486	136599486	G	A	exonic	BCLAF1	BCL2 associated transcription factor 1	nonsynonymous SNV	p.P178L	rs761434446	0	0	0	N	ID=COSM6105561;OCCURENCE=1(lung)	.
chr6	136599487	136599487	G	A	exonic	BCLAF1	BCL2 associated transcription factor 1	nonsynonymous SNV	p.P178S		0	0	0	N	ID=COSM1698054;OCCURENCE=2(skin)	.
chr6	137815225	137815225	C	T	exonic	OLIG3	oligodendrocyte transcription factor 3	nonsynonymous SNV	p.R28H		0	0	0	D	ID=COSM5869399;OCCURENCE=1(NS)	.
chr6	138753647	138753647	T	A	exonic	NHSL1	NHS like 1	nonsynonymous SNV	p.H616L		0	0	0	D	ID=COSM4452418,COSM4452419;OCCURENCE=1(skin)	.
chr6	146275959	146275959	G	A	exonic	SHPRH	SNF2 histone linker PHD RING helicase	nonsynonymous SNV	p.P167L	rs202001786	0	0	0	N	ID=COSM4725918,COSM4725919;OCCURENCE=2(large_intestine)	.
chr6	146351203	146351203	G	A	exonic	GRM1	glutamate metabotropic receptor 1	nonsynonymous SNV	p.A184T		0	0	0	D	ID=COSM145464,COSM1317163;OCCURENCE=3(haematopoietic_and_lymphoid_tissue),1(large_intestine)	.	DHPG; INOSITOL; LY341495; [18F]FITM; (S)-4C3HPG; COMPOUND 9A [PMID: 22266036]; COMPOUND 11Q [PMID: 19433355]; LY367385; JNJ16259685; COMPOUND 11S [PMID: 19433355]; PHCCC; OPIOID; COMPOUND 2F [PMID: 17532216]; CIS-10 [PMID: 15771457]; L-GLUTAMIC ACID; COMPOUND 12E [PMID: 22266036]; MORPHINE; COMPOUND 10I [PMID: 23084894]; [3H]R214127; R214127; MK-5435; CFMMC; CPCCOET; COMPOUND 22 [PMID: 17276684];…
chr6	151859258	151859258	G	A	exonic	CCDC170	coiled-coil domain containing 170	nonsynonymous SNV	p.E89K		0	0	0	N	ID=COSM4539203;OCCURENCE=2(skin)	.
chr6	152201885	152201885	G	A	exonic	ESR1	estrogen receptor 1	nonsynonymous SNV	p.E247K	rs778449608	0	1	0	D	ID=COSM3430125,COSM280867;OCCURENCE=1(skin),5(large_intestine),1(biliary_tract),1(endometrium)	Hormonal therapy	FULVESTRANT; IDOXIFENE; NORELGESTROMIN; Exemestane; Trastuzumab; ESTRIOL E3; EC145; Exemestane; HORMONE THERAPY; ETHYNODIOL DIACETATE; Anastrozole; Letrozole; R,R-THC; ESTRIOL; Lapatinib; PRINABEREL; ETHINYL ESTRADIOL; ESTRADIOL ACETATE; ACOLBIFENE; MK-6913; OSPEMIFENE; 17β-ESTRADIOL; OSPEMIFENE; Tamoxifen; CONJUGATED ESTROGENS; TAMOXIFEN; QUINESTROL; ESTROGENS, CONJUGATED SYNTHETIC A; A-007; TOR…	Breast Cancer,EL:3A:AZD9496, Fulvestrant(27986707, 27269946)
chr6	152454491	152454491	G	A	exonic	SYNE1	spectrin repeat containing nuclear envelope protein 1	nonsynonymous SNV	p.R8641W	rs762289784	0	0	0	N	ID=COSM5869532,COSM5869530,COSM5869529,COSM5869533,COSM5869531;OCCURENCE=2(NS)	.
chr6	152749388	152749388	G	A	exonic	SYNE1	spectrin repeat containing nuclear envelope protein 1	nonsynonymous SNV	p.A1643V	rs753598584	0	0	0	N	ID=COSM3859629,COSM3859632,COSM3859630,COSM3859628,COSM3859631;OCCURENCE=1(stomach),1(large_intestine)	.
chr6	152770727	152770727	C	T	exonic	SYNE1	spectrin repeat containing nuclear envelope protein 1	nonsynonymous SNV	p.G1149R		0	0	0	N	ID=COSM4992590,COSM4992591,COSM4992592,COSM4992594,COSM4992593;OCCURENCE=1(skin)	.
chr6	153043059	153043059	C	T	exonic	MYCT1	MYC target 1	nonsynonymous SNV	p.R127C	rs17852097	0	0	0	N	ID=COSM1441689;OCCURENCE=1(NS),1(large_intestine)	.
chr6	155153768	155153768	C	T	exonic	SCAF8	SR-related CTD associated factor 8	nonsynonymous SNV	p.P1085S		0	0	0	D	ID=COSM3622197,COSM3622196;OCCURENCE=1(skin)	.
chr6	158900939	158900939	G	A	exonic	TULP4	tubby like protein 4	nonsynonymous SNV	p.V395I	rs138487081	0	0	0	N	ID=COSM6031766;OCCURENCE=1(large_intestine)	.
chr6	158923159	158923159	-	C	exonic	TULP4	tubby like protein 4	frameshift insertion	p.A822fs		0	0	0		ID=COSM1441865;OCCURENCE=1(large_intestine)	.
chr6	159653489	159653489	G	A	exonic	FNDC1	fibronectin type III domain containing 1	nonsynonymous SNV	p.E649K		0	0	0	N	ID=COSM1441904;OCCURENCE=3(skin),2(large_intestine)	.
chr6	160557636	160557636	C	T	exonic	SLC22A1	solute carrier family 22 member 1	nonsynonymous SNV	p.R339C	rs762114095	0	0	0	D	ID=COSM5869705;OCCURENCE=1(NS)	.	CLONIDINE
chr6	161016418	161016418	G	T	exonic	LPA	lipoprotein(a)	nonsynonymous SNV	p.P1146Q		0	0	0	D	ID=COSM6547851;OCCURENCE=1(lung)	.
chr6	161026093	161026093	G	T	exonic	LPA	lipoprotein(a)	nonsynonymous SNV	p.A977E		0	0	0	N	ID=COSM450852;OCCURENCE=1(breast),1(liver),1(endometrium)	.
chr6	161470602	161470602	G	A	exonic	MAP3K4	mitogen-activated protein kinase kinase kinase 4	nonsynonymous SNV	p.R433Q	rs778101871	0	0	0	N	ID=COSM4972096,COSM4972095;OCCURENCE=1(thyroid)	.
chr6	165711527	165711527	C	T	exonic	C6orf118	chromosome 6 open reading frame 118	nonsynonymous SNV	p.A334T	rs202037689	0	0	0	N	ID=COSM3393968,COSM3393969;OCCURENCE=1(pancreas),1(large_intestine)	.
chr6	165715680	165715680	A	C	exonic	C6orf118	chromosome 6 open reading frame 118	nonsynonymous SNV	p.L44R		0	0	0	N	ID=COSM1246891;OCCURENCE=2(stomach)	.
chr6	166721290	166721290	G	A	exonic	PRR18	proline rich 18	nonsynonymous SNV	p.T114M		0	0	0	N	ID=COSM5357843;OCCURENCE=1(large_intestine)	.
chr6	166912004	166912004	C	T	exonic	RPS6KA2	ribosomal protein S6 kinase A2	nonsynonymous SNV	p.V272M	rs776635505	0	0	0	D	ID=COSM6769507,COSM6769504,COSM6769505,COSM6769506;OCCURENCE=1(large_intestine)	.	BI-D1870; COMPOUND 25B [PMID: 22564207]
chr6	167570740	167570740	C	T	exonic	GPR31	G protein-coupled receptor 31	nonsynonymous SNV	p.V194M	rs369377204	0	0	0	N	ID=COSM1075951;OCCURENCE=1(endometrium)	.
chr6	167728900	167728900	T	C	exonic	UNC93A	unc-93 homolog A	nonsynonymous SNV	p.V445A	rs752323292	0	0	0	N	ID=COSM140578;OCCURENCE=4(liver),1(skin),1(lung),3(thyroid),3(upper_aerodigestive_tract),1(large_intestine)	.
chr6	169053902	169053902	C	T	exonic	SMOC2	SPARC related modular calcium binding 2	nonsynonymous SNV	p.R438C	rs368210259	0	0	0	N	ID=COSM4973241,COSM4973240;OCCURENCE=2(oesophagus)	.
chr7	590099	590099	G	A	exonic	PRKAR1B	protein kinase cAMP-dependent type I regulatory subunit beta	nonsynonymous SNV	p.R372C	rs765576596	0	0	0	D	ID=COSM4650761;OCCURENCE=1(large_intestine)	.
[truncated: 303 more rows]

## Sheet: Unknown_Mutations
Chr	Start	End	Ref	Alt	Type	Symbol	Genename	Exonic Function	AAChange	snp150	TSG	OG	HS	Condel	Cosmic84	Target	DGIdb	OncoKB
[truncated: 8,275 more rows]
